# Supplementary material for: Expression of Root Genes in Arabidopsis Seedlings Grown by Standard and Improved Growing Methods
Source: MDPI journal article supplement (doi:10.3390/ijms18050951), 2017-05-03
Supplement: s1 [file s1]

**Supplementary Table 3.** List of all 141 PEGs from IPG/TPG comparison groups.

| Gene_id   | readcount_TPG | readcount_IPG | log <sub>2</sub> Fold change<br>(TPG vs IPG) | q value    |
|-----------|---------------|---------------|----------------------------------------------|------------|
| AT3G22142 | 16.96262238   | 0             | 4.738                                        | 0.0020806  |
| AT5G04120 | 22.83263929   | 1.662408091   | 3.7798                                       | 0.00041635 |
| AT1G08090 | 40.18371867   | 3.227027471   | 3.6383                                       | 2.97E-07   |
| AT5G17220 | 20.07027839   | 1.955774225   | 3.3592                                       | 0.0028957  |
| AT4G31940 | 99.66080173   | 12.32137762   | 3.0159                                       | 8.21E-16   |
| AT4G15480 | 191.6819491   | 29.87445129   | 2.6817                                       | 2.38E-27   |
| AT5G62210 | 233.721629    | 38.38206917   | 2.6063                                       | 1.93E-32   |
| AT3G28160 | 50.11095314   | 9.583293703   | 2.3865                                       | 6.12E-06   |
| AT3G60140 | 139.9308442   | 27.08747302   | 2.369                                        | 3.76E-17   |
| AT5G15960 | 117.9182808   | 23.51818506   | 2.3259                                       | 4.41E-14   |
| AT1G44575 | 30.60177931   | 6.356266231   | 2.2674                                       | 0.0025789  |
| AT5G24770 | 91.41688093   | 19.06879869   | 2.2612                                       | 1.90E-10   |
| AT3G22840 | 262.5969327   | 57.10860737   | 2.2011                                       | 7.64E-30   |

|           |             |             |        |            |
|-----------|-------------|-------------|--------|------------|
| AT4G37800 | 72.33932598 | 16.28182042 | 2.1515 | 1.13E-07   |
| AT5G07990 | 513.8854506 | 117.1019817 | 2.1337 | 6.72E-57   |
| AT5G17700 | 32.71671187 | 7.480836411 | 2.1288 | 0.0028192  |
| AT2G34810 | 35.17693954 | 8.60540659  | 2.0313 | 0.0025671  |
| AT2G22590 | 178.0859541 | 45.22727895 | 1.9773 | 1.96E-17   |
| AT5G15970 | 332.4328692 | 85.36954492 | 1.9613 | 1.10E-32   |
| AT1G10370 | 167.8565864 | 43.90713135 | 1.9347 | 5.93E-16   |
| AT2G23910 | 539.9552315 | 142.0381031 | 1.9266 | 1.81E-52   |
| AT4G14690 | 68.62740353 | 18.77543256 | 1.8699 | 5.62E-06   |
| AT1G65060 | 256.295297  | 76.42187784 | 1.7457 | 2.43E-21   |
| AT4G04840 | 104.7107427 | 32.71032391 | 1.6786 | 5.44E-08   |
| AT5G17040 | 59.95186384 | 18.82432692 | 1.6712 | 0.0002134  |
| AT4G19810 | 55.20405605 | 17.4063906  | 1.6652 | 0.00051027 |
| AT5G44400 | 76.91448622 | 24.44717781 | 1.6536 | 1.23E-05   |
| AT4G03210 | 102.8979434 | 32.71032391 | 1.6534 | 1.14E-07   |
| AT4G35770 | 136.8231882 | 44.39607491 | 1.6238 | 4.58E-10   |

|           |             |             |        |            |
|-----------|-------------|-------------|--------|------------|
| AT5G49360 | 326.3902047 | 106.5408009 | 1.6152 | 1.90E-24   |
| AT4G02290 | 184.1286185 | 60.23784613 | 1.612  | 1.57E-13   |
| AT5G48880 | 403.4773385 | 134.4105836 | 1.5858 | 1.68E-29   |
| AT4G04750 | 52.61434271 | 17.60196803 | 1.5797 | 0.0015494  |
| AT1G01580 | 152.7930871 | 51.6813339  | 1.5639 | 1.19E-10   |
| AT1G77760 | 226.8157268 | 77.05750447 | 1.5575 | 6.10E-16   |
| AT1G30530 | 74.58374421 | 25.76732541 | 1.5333 | 7.23E-05   |
| AT3G55120 | 712.5596257 | 248.9211645 | 1.5173 | 1.70E-49   |
| AT2G18150 | 112.2209114 | 39.31106192 | 1.5133 | 2.46E-07   |
| AT3G21560 | 389.6223721 | 137.9309772 | 1.4981 | 3.41E-26   |
| AT3G53980 | 64.39753841 | 22.93145279 | 1.4897 | 0.00054362 |
| AT1G42550 | 108.120532  | 38.96880143 | 1.4722 | 9.08E-07   |
| AT2G38230 | 109.6311981 | 39.70221677 | 1.4654 | 8.22E-07   |
| AT5G56080 | 53.08912348 | 19.31327047 | 1.4588 | 0.0037936  |
| AT1G06000 | 172.8202036 | 63.85602845 | 1.4364 | 1.26E-10   |
| AT5G17050 | 295.7021016 | 117.3953479 | 1.3328 | 1.85E-16   |

|           |             |             |        |            |
|-----------|-------------|-------------|--------|------------|
| AT1G22770 | 72.64145921 | 28.84766982 | 1.3323 | 0.00084469 |
| AT1G78290 | 106.9119991 | 43.71155393 | 1.2903 | 2.06E-05   |
| AT5G05270 | 784.6831422 | 322.7027471 | 1.2819 | 3.99E-42   |
| AT5G08640 | 1575.840568 | 648.9747822 | 1.2799 | 3.77E-85   |
| AT3G53260 | 905.709079  | 373.6017713 | 1.2775 | 1.63E-48   |
| AT4G11650 | 202.9472021 | 84.19608039 | 1.2693 | 2.54E-10   |
| AT1G21400 | 112.9546635 | 47.62310238 | 1.246  | 2.06E-05   |
| AT3G23810 | 923.0169965 | 389.1990708 | 1.2458 | 1.50E-47   |
| AT1G06430 | 82.35288423 | 35.20393605 | 1.2261 | 0.00086896 |
| AT1G55020 | 313.830095  | 135.0462102 | 1.2165 | 3.92E-15   |
| AT2G33770 | 183.8264853 | 79.1110674  | 1.2164 | 1.12E-08   |
| AT1G10960 | 82.13707479 | 35.35061912 | 1.2163 | 0.0009985  |
| AT2G25160 | 79.07258067 | 34.17715458 | 1.2101 | 0.0015022  |
| AT2G25530 | 76.48286733 | 33.24816183 | 1.2019 | 0.0022297  |
| AT5G52310 | 94.99931772 | 41.41351922 | 1.1978 | 0.00032128 |
| AT4G30470 | 199.494251  | 87.52089657 | 1.1886 | 4.22E-09   |

|           |             |             |        |            |
|-----------|-------------|-------------|--------|------------|
| AT1G10070 | 125.8169065 | 55.34841057 | 1.1847 | 1.41E-05   |
| AT4G16260 | 131.6005996 | 58.1842832  | 1.1775 | 8.80E-06   |
| AT1G24280 | 111.7461307 | 49.43219354 | 1.1767 | 7.23E-05   |
| AT3G47780 | 89.5609197  | 39.80000548 | 1.1701 | 0.00079283 |
| AT3G04720 | 126.4211729 | 56.47298075 | 1.1626 | 1.98E-05   |
| AT1G78570 | 1198.174039 | 536.7622361 | 1.1585 | 4.66E-55   |
| AT5G04950 | 95.99204116 | 43.66265957 | 1.1365 | 0.00064475 |
| AT3G47340 | 174.7624886 | 80.72458114 | 1.1143 | 4.08E-07   |
| AT4G15530 | 120.9827749 | 56.42408639 | 1.1004 | 9.99E-05   |
| AT5G13930 | 5369.080022 | 2523.046539 | 1.0895 | 5.86E-228  |
| AT1G30510 | 336.6195724 | 160.6179582 | 1.0675 | 4.14E-13   |
| AT3G44300 | 526.4887222 | 253.2238678 | 1.056  | 2.21E-20   |
| AT1G79040 | 163.4540737 | 78.6710182  | 1.055  | 4.99E-06   |
| AT5G10470 | 113.7315775 | 55.00615008 | 1.048  | 0.00045244 |
| AT3G49120 | 431.3599188 | 208.8766872 | 1.0462 | 2.24E-16   |
| AT4G09750 | 89.86305292 | 43.51597651 | 1.0462 | 0.003614   |

|           |             |             |         |            |
|-----------|-------------|-------------|---------|------------|
| AT1G55320 | 149.9444024 | 72.80369553 | 1.0423  | 2.10E-05   |
| AT5G42270 | 206.09802   | 100.7223726 | 1.0329  | 1.97E-07   |
| AT5G01600 | 126.5074967 | 62.19362036 | 1.0244  | 0.00022604 |
| AT2G37040 | 2093.610588 | 1041.84093  | 1.0069  | 5.00E-77   |
| AT5G13630 | 93.31600404 | 46.59632091 | 1.0019  | 0.0047098  |
| AT1G32640 | 270.7113679 | 543.3140797 | -1.005  | 3.77E-19   |
| AT1G13260 | 120.2490228 | 241.5381168 | -1.0062 | 2.71E-08   |
| AT2G22330 | 94.69718449 | 192.0081345 | -1.0198 | 1.13E-06   |
| AT4G37610 | 83.34560768 | 171.6191882 | -1.042  | 0.00000384 |
| AT2G06050 | 43.16188901 | 88.93883288 | -1.0431 | 4.46E-03   |
| AT3G23430 | 216.9316542 | 447.0899878 | -1.0433 | 1.12E-16   |
| AT1G20510 | 90.89893826 | 189.6123111 | -1.0607 | 4.72E-07   |
| AT5G22920 | 64.0090814  | 133.6282739 | -1.0619 | 7.04E-05   |
| AT1G78280 | 63.79327196 | 133.3838021 | -1.0641 | 6.94E-05   |
| AT1G73080 | 72.85726865 | 153.8216428 | -1.0781 | 8.36E-06   |
| AT2G42760 | 73.4615351  | 155.7285227 | -1.084  | 0.00000616 |

|           |             |             |         |            |
|-----------|-------------|-------------|---------|------------|
| AT1G19180 | 306.449412  | 650.4905072 | -1.0859 | 2.99E-26   |
| AT4G17500 | 95.60358416 | 204.1828291 | -1.0947 | 4.84E-08   |
| AT2G32150 | 136.5210549 | 295.1752249 | -1.1124 | 3.95E-12   |
| AT1G66760 | 47.69388736 | 103.5093509 | -1.1179 | 4.52E-04   |
| AT5G18670 | 69.01586053 | 150.1545661 | -1.1214 | 0.00000475 |
| AT3G25190 | 125.0399925 | 273.4172367 | -1.1287 | 1.76E-11   |
| AT4G15760 | 47.00329713 | 104.7806041 | -1.1565 | 2.31E-04   |
| AT5G01040 | 111.4008355 | 248.4322209 | -1.1571 | 7.97E-11   |
| AT5G48412 | 70.26755531 | 161.0091131 | -1.1962 | 2.84E-07   |
| AT2G25460 | 110.5375978 | 254.6906985 | -1.2042 | 7.18E-12   |
| AT5G42650 | 57.57795994 | 136.1218861 | -1.2413 | 1.74E-06   |
| AT5G41080 | 228.283231  | 546.2966354 | -1.2589 | 5.98E-28   |
| AT4G17615 | 34.65899688 | 83.56045376 | -1.2696 | 5.09E-04   |
| AT1G49500 | 36.04017732 | 87.71647399 | -1.2832 | 0.00026222 |
| AT4G21850 | 85.93532102 | 210.1479405 | -1.2901 | 7.11E-11   |
| AT2G14878 | 78.38199045 | 192.9860217 | -1.2999 | 4.36E-10   |

|           |             |             |         |           |
|-----------|-------------|-------------|---------|-----------|
| AT1G70850 | 1114.094679 | 2766.247064 | -1.3121 | 1.99E-155 |
| AT2G01520 | 402.8299101 | 1003.263283 | -1.3165 | 8.76E-56  |
| AT1G80840 | 141.182539  | 352.6749871 | -1.3208 | 2.91E-19  |
| AT3G15630 | 58.00957883 | 150.4479323 | -1.3749 | 1.64E-08  |
| AT2G18210 | 24.25698162 | 66.15406316 | -1.4474 | 6.81E-04  |
| AT3G59930 | 76.95764811 | 213.9617002 | -1.4752 | 1.04E-13  |
| AT1G26250 | 78.166181   | 221.491431  | -1.5026 | 1.29E-14  |
| AT5G19120 | 98.92704962 | 281.2403336 | -1.5074 | 9.36E-19  |
| AT5G05600 | 25.68132396 | 73.39042779 | -1.5149 | 1.17E-04  |
| AT5G19110 | 19.07755494 | 55.54398799 | -1.5418 | 1.41E-03  |
| AT1G32450 | 108.2068558 | 323.778423  | -1.5812 | 2.64E-23  |
| AT1G72450 | 43.46402223 | 131.2324505 | -1.5942 | 2.76E-09  |
| AT3G09940 | 65.73555696 | 201.1024847 | -1.6132 | 1.03E-14  |
| AT5G63160 | 64.26805274 | 197.9732459 | -1.6231 | 1.29E-14  |
| AT1G79310 | 11.86951948 | 40.68010388 | -1.7771 | 3.48E-03  |
| AT2G46510 | 17.73953638 | 60.97126147 | -1.7812 | 0.0000688 |



|           |             |             |         |           |
|-----------|-------------|-------------|---------|-----------|
| AT4G34410 | 66.55563286 | 229.7056827 | −1.7872 | 1.44E−19  |
| AT1G11185 | 14.41607093 | 50.06782016 | −1.7962 | 5.08E−04  |
| AT1G12610 | 14.50239471 | 51.14349598 | −1.8183 | 0.000347  |
| AT4G21830 | 34.40002554 | 122.1381004 | −1.828  | 1.53E−10  |
| AT2G25735 | 15.36563249 | 54.56610088 | −1.8283 | 1.63E−04  |
| AT3G14260 | 11.86951948 | 44.78722975 | −1.9158 | 6.25E−04  |
| AT1G74930 | 23.04844873 | 89.77003693 | −1.9616 | 1.91E−08  |
| AT4G12550 | 21.66726828 | 90.89460711 | −2.0687 | 3.44E−09  |
| AT1G17420 | 9.884072584 | 42.09804019 | −2.0906 | 3.84E−04  |
| AT5G12340 | 7.639654355 | 34.07936587 | −2.1573 | 1.82E−03  |
| AT5G33355 | 15.79725138 | 75.88403993 | −2.2641 | 1.44E−08  |
| AT1G28480 | 20.28608784 | 105.5140194 | −2.3789 | 7.56E−13  |
| AT1G74950 | 30.34280798 | 160.5690639 | −2.4038 | 5.14E−20  |
| AT2G34600 | 8.891349136 | 47.3786306  | −2.4138 | 0.000012  |
| AT5G13220 | 3.237141676 | 23.51818506 | −2.861  | 0.0027735 |

---
