# Supplementary material for: Expression of Root Genes in Arabidopsis Seedlings Grown by Standard and Improved Growing Methods
Source: MDPI journal article supplement (doi:10.3390/ijms18050951), 2017-05-03
Supplement: s1 [file s1]

**Supplementary Table 1.** List of all 2245 DEGs from IPG/SG comparison groups.

| Gene_id   | readcount_IPG | readcount_IPG | log <sub>2</sub> Fold change (IPG vs SG) | q value    |
|-----------|---------------|---------------|------------------------------------------|------------|
| AT5G22890 | 28.17093568   | 0             | 9.2233                                   | 1.01E-05   |
| AT1G51840 | 26.87572025   | 0             | 8.1554                                   | 3.71E-06   |
| AT1G51830 | 114.6265659   | 0             | 7.663                                    | 7.41E-26   |
| AT5G23990 | 18.78062379   | 0             | 7.6383                                   | 0.00010944 |
| AT5G07990 | 110.7871773   | 0             | 7.2919                                   | 8.63E-26   |
| AT2G24762 | 40.01290536   | 0             | 6.4076                                   | 4.39E-10   |
| AT1G73120 | 15.86638906   | 0             | 6.395                                    | 0.00023408 |
| AT3G46900 | 10.40798116   | 0             | 6.2018                                   | 0.0042396  |
| AT5G59520 | 71.42187962   | 0             | 6.1731                                   | 8.35E-18   |
| AT4G29740 | 18.22553146   | 0             | 5.7877                                   | 5.61E-05   |
| AT5G17040 | 17.80921221   | 0             | 5.7543                                   | 7.03E-05   |
| AT5G04950 | 41.30812079   | 0             | 5.688                                    | 1.45E-10   |
| AT3G28345 | 132.7133242   | 2.59230539    | 5.6779                                   | 4.64E-33   |

|           |             |             |        |            |
|-----------|-------------|-------------|--------|------------|
| AT1G08430 | 10.36172347 | 0           | 5.4584 | 0.0041332  |
| AT2G25090 | 17.48540835 | 0           | 5.3653 | 8.51E-05   |
| AT5G26270 | 27.10700872 | 0           | 5.2608 | 4.25E-07   |
| AT4G25100 | 210.7500541 | 5.514540558 | 5.2561 | 3.67E-52   |
| AT5G48010 | 339.8090205 | 9.332299405 | 5.1863 | 6.96E-84   |
| AT5G35190 | 40.75302846 | 1.178320632 | 5.1121 | 2.37E-10   |
| AT4G12510 | 23.63768166 | 0           | 4.9701 | 3.30E-06   |
| AT5G48000 | 252.8908134 | 8.201111598 | 4.9466 | 6.28E-62   |
| AT1G31320 | 12.62835048 | 0           | 4.8958 | 0.0013444  |
| AT5G03995 | 14.98749287 | 0           | 4.8534 | 0.00038436 |
| AT5G50760 | 46.76652869 | 1.649648885 | 4.8252 | 1.13E-11   |
| AT3G08040 | 65.45463709 | 2.309508439 | 4.8248 | 3.62E-16   |
| AT3G56290 | 34.32320899 | 1.272586283 | 4.7533 | 1.15E-08   |
| AT3G09220 | 129.9378626 | 4.996079479 | 4.7009 | 1.67E-31   |
| AT4G04750 | 16.65276986 | 0           | 4.6575 | 0.00017379 |
| AT4G12520 | 106.9477887 | 4.430485576 | 4.5933 | 8.50E-26   |

|           |             |             |        |            |
|-----------|-------------|-------------|--------|------------|
| AT3G14060 | 21.55608543 | 0           | 4.5892 | 1.34E-05   |
| AT3G49330 | 13.36847358 | 0           | 4.5629 | 0.0010473  |
| AT4G31940 | 11.6569389  | 0           | 4.5431 | 0.0025919  |
| AT4G11210 | 19.70577767 | 0           | 4.5377 | 3.73E-05   |
| AT5G47980 | 19.70577767 | 0           | 4.5377 | 3.73E-05   |
| AT4G31330 | 11.93448507 | 0           | 4.5248 | 0.0022617  |
| AT1G66725 | 36.45106292 | 1.602516059 | 4.5076 | 5.05E-09   |
| AT4G37310 | 24.60909324 | 1.084054981 | 4.5047 | 2.86E-06   |
| AT2G25160 | 32.33412815 | 1.461117584 | 4.4679 | 4.91E-08   |
| AT5G47990 | 194.7911497 | 8.813838327 | 4.466  | 2.86E-46   |
| AT3G26290 | 14.29362746 | 0           | 4.4371 | 0.00069633 |
| AT1G64500 | 14.24736977 | 0           | 4.4324 | 0.00071582 |
| AT4G37160 | 15.26503904 | 0           | 4.4324 | 0.00041935 |
| AT1G54970 | 11.98074276 | 0           | 4.4048 | 0.0023542  |
| AT5G04960 | 23.73019705 | 1.131187807 | 4.3908 | 5.18E-06   |
| AT5G62210 | 36.31228983 | 1.791047361 | 4.3416 | 7.28E-09   |

|           |             |             |        |            |
|-----------|-------------|-------------|--------|------------|
| AT3G62680 | 32.88922047 | 1.649648885 | 4.3174 | 4.66E-08   |
| AT1G65970 | 118.234666  | 5.938735985 | 4.3154 | 8.21E-28   |
| AT2G03090 | 116.8931929 | 6.033001636 | 4.2762 | 2.17E-27   |
| AT5G47950 | 27.19952411 | 1.413984758 | 4.2657 | 9.86E-07   |
| AT1G80340 | 18.04050068 | 0           | 4.2584 | 0.00011523 |
| AT3G61220 | 57.45205602 | 3.016500818 | 4.2514 | 1.30E-13   |
| AT3G45710 | 100.703     | 5.326009256 | 4.2409 | 1.47E-23   |
| AT4G34881 | 618.9742042 | 32.75731357 | 4.24   | 1.60E-143  |
| AT2G23910 | 134.3786012 | 7.541252044 | 4.1554 | 5.04E-31   |
| AT1G78990 | 24.33154707 | 1.366851933 | 4.1539 | 5.17E-06   |
| AT4G08400 | 24.74786632 | 1.413984758 | 4.1295 | 4.31E-06   |
| AT4G29905 | 250.6241864 | 14.32837888 | 4.1286 | 1.84E-57   |
| AT5G10230 | 23.82271244 | 1.366851933 | 4.1234 | 7.00E-06   |
| AT5G66580 | 13.09092742 | 0           | 4.1176 | 0.0016248  |
| AT3G01260 | 32.657932   | 1.885313011 | 4.1146 | 7.69E-08   |
| AT1G77990 | 22.85130086 | 1.319719108 | 4.114  | 1.17E-05   |

|           |             |             |        |            |
|-----------|-------------|-------------|--------|------------|
| AT3G49960 | 12.16577354 | 0           | 4.105  | 0.0026093  |
| AT4G04840 | 30.94639732 | 1.838180186 | 4.0734 | 2.00E-07   |
| AT5G38100 | 14.20111208 | 0           | 4.0651 | 0.0009773  |
| AT3G44990 | 182.9029223 | 10.93481546 | 4.0641 | 1.18E-41   |
| AT3G57020 | 257.6553559 | 15.69523082 | 4.037  | 2.12E-58   |
| AT2G46420 | 19.93706614 | 1.225453457 | 4.0241 | 5.77E-05   |
| AT4G08410 | 38.99523609 | 2.450906914 | 3.9919 | 4.03E-09   |
| AT1G64170 | 28.95731648 | 1.838180186 | 3.9776 | 6.60E-07   |
| AT5G13900 | 24.65535093 | 1.649648885 | 3.9017 | 6.59E-06   |
| AT5G57785 | 28.17093568 | 1.885313011 | 3.9013 | 1.14E-06   |
| AT4G08040 | 19.56700459 | 1.319719108 | 3.8901 | 8.35E-05   |
| AT1G32450 | 306.31845   | 21.8224981  | 3.8111 | 3.32E-67   |
| AT3G45700 | 23.68393936 | 1.69678171  | 3.803  | 1.28E-05   |
| AT4G01680 | 13.13718511 | 0           | 3.8008 | 0.0021101  |
| AT2G25000 | 15.03375057 | 1.084054981 | 3.7937 | 0.00085861 |
| AT5G20700 | 322.5549007 | 23.56641264 | 3.7747 | 2.39E-70   |

|           |             |             |        |            |
|-----------|-------------|-------------|--------|------------|
| AT5G66690 | 139.8370091 | 10.22782309 | 3.7732 | 1.29E-30   |
| AT4G00880 | 49.54199033 | 3.629227546 | 3.7709 | 4.27E-11   |
| AT2G01530 | 614.1171463 | 45.43604357 | 3.7566 | 1.99E-133  |
| AT5G08640 | 613.9783732 | 45.48317639 | 3.7548 | 2.31E-133  |
| AT1G51860 | 46.99781716 | 3.487829071 | 3.7522 | 1.61E-10   |
| AT3G46130 | 22.01866237 | 1.649648885 | 3.7385 | 3.20E-05   |
| AT2G40230 | 14.70994671 | 1.131187807 | 3.7009 | 0.0011159  |
| AT2G39310 | 230.6408626 | 17.76907513 | 3.6982 | 1.06E-49   |
| AT5G13930 | 2386.989529 | 185.5148003 | 3.6856 | 0          |
| AT1G16400 | 52.73377122 | 4.147688624 | 3.6683 | 1.37E-11   |
| AT3G58990 | 50.18959805 | 3.959157323 | 3.6641 | 4.85E-11   |
| AT2G36090 | 16.42148139 | 1.319719108 | 3.6373 | 0.00054116 |
| AT1G22750 | 49.68076342 | 4.006290149 | 3.6323 | 7.09E-11   |
| AT1G35515 | 12.58209278 | 1.036922156 | 3.601  | 0.0033765  |
| AT3G25930 | 108.4280349 | 8.955236803 | 3.5979 | 4.11E-23   |
| AT3G09260 | 11533.93969 | 955.1938371 | 3.5939 | 0          |

|           |             |             |        |            |
|-----------|-------------|-------------|--------|------------|
| AT1G78090 | 61.80027926 | 5.137477955 | 3.5885 | 2.59E-13   |
| AT4G28250 | 115.6442351 | 9.662229182 | 3.5812 | 1.51E-24   |
| AT1G64780 | 183.4117569 | 15.36530104 | 3.5773 | 1.01E-38   |
| AT3G59340 | 22.85130086 | 1.932445836 | 3.5638 | 3.01E-05   |
| AT4G37760 | 34.83204362 | 2.969367993 | 3.5522 | 1.13E-07   |
| AT5G49080 | 28.72602801 | 2.450906914 | 3.551  | 1.99E-06   |
| AT1G14160 | 18.22553146 | 1.555383234 | 3.5506 | 0.00026417 |
| AT2G29340 | 14.89497749 | 1.272586283 | 3.549  | 0.001241   |
| AT4G15393 | 74.93746437 | 6.410064238 | 3.5473 | 6.17E-16   |
| AT1G70890 | 32.42664353 | 2.780836691 | 3.5436 | 3.56E-07   |
| AT5G19600 | 23.59142397 | 2.026711487 | 3.541  | 2.23E-05   |
| AT2G04090 | 14.20111208 | 1.225453457 | 3.5346 | 0.0017358  |
| AT4G04745 | 16.23645061 | 1.413984758 | 3.5214 | 0.00069536 |
| AT4G13390 | 44.31487091 | 3.864891673 | 3.5193 | 1.46E-09   |
| AT5G26310 | 18.87313917 | 1.649648885 | 3.5161 | 0.00020794 |
| AT3G09270 | 284.1147569 | 24.83899892 | 3.5158 | 3.63E-59   |

|           |             |             |        |            |
|-----------|-------------|-------------|--------|------------|
| AT3G25190 | 258.6730252 | 22.85942026 | 3.5003 | 1.05E-53   |
| AT4G15290 | 16.05141984 | 1.461117584 | 3.4576 | 0.00083244 |
| AT4G22460 | 14.38614285 | 1.319719108 | 3.4464 | 0.0017941  |
| AT4G28740 | 13.27595819 | 1.225453457 | 3.4374 | 0.002976   |
| AT5G09520 | 28.58725493 | 2.639438216 | 3.4371 | 2.86E-06   |
| AT4G20240 | 22.94381625 | 2.120977138 | 3.4353 | 3.78E-05   |
| AT2G18050 | 41.40063618 | 3.864891673 | 3.4212 | 8.44E-09   |
| AT5G36180 | 37.19118602 | 3.487829071 | 3.4146 | 6.00E-08   |
| AT1G14960 | 40.15167844 | 3.770626022 | 3.4126 | 1.56E-08   |
| AT5G47110 | 52.59499814 | 4.996079479 | 3.3961 | 5.57E-11   |
| AT5G48880 | 127.162401  | 12.16026892 | 3.3864 | 6.32E-26   |
| AT4G39770 | 22.11117776 | 2.120977138 | 3.382  | 6.21E-05   |
| AT1G12740 | 60.96764077 | 5.89160316  | 3.3713 | 1.35E-12   |
| AT1G55990 | 54.67659437 | 5.373142082 | 3.3471 | 2.79E-11   |
| AT4G12330 | 12.4433197  | 1.225453457 | 3.344  | 0.0048733  |
| AT3G23730 | 22.94381625 | 2.262375613 | 3.3422 | 4.67E-05   |



|           |             |             |        |            |
|-----------|-------------|-------------|--------|------------|
| AT2G28470 | 71.42187962 | 7.069923792 | 3.3366 | 1.43E-14   |
| AT4G31910 | 59.81119841 | 6.033001636 | 3.3095 | 3.37E-12   |
| AT1G49310 | 56.29561367 | 5.703071859 | 3.3032 | 1.71E-11   |
| AT3G20370 | 258.1179328 | 26.39438216 | 3.2897 | 3.29E-51   |
| AT4G17280 | 47.22910563 | 4.854681004 | 3.2822 | 1.14E-09   |
| AT5G48290 | 35.15584748 | 3.629227546 | 3.276  | 2.49E-07   |
| AT4G35030 | 30.94639732 | 3.205032119 | 3.2714 | 1.62E-06   |
| AT1G78370 | 32.657932   | 3.39356342  | 3.2666 | 7.69E-07   |
| AT1G60270 | 39.78161689 | 4.147688624 | 3.2617 | 3.42E-08   |
| AT2G48130 | 124.5719701 | 13.0557926  | 3.2542 | 1.17E-24   |
| AT2G24980 | 76.60274136 | 8.059713123 | 3.2486 | 2.71E-15   |
| AT1G22430 | 16.51399678 | 1.743914535 | 3.2433 | 0.00095852 |
| AT5G41040 | 124.3406816 | 13.15005825 | 3.2412 | 1.54E-24   |
| AT3G01420 | 255.5737597 | 27.05424171 | 3.2398 | 4.13E-50   |
| AT3G02885 | 17.53166605 | 1.885313011 | 3.2171 | 0.00064725 |
| AT5G62920 | 17.67043913 | 1.932445836 | 3.1928 | 0.00063889 |

|           |             |             |        |            |
|-----------|-------------|-------------|--------|------------|
| AT5G01250 | 13.78479283 | 1.508250409 | 3.1921 | 0.0033221  |
| AT1G34040 | 34.73952824 | 3.817758848 | 3.1858 | 4.17E-07   |
| AT2G43100 | 46.720271   | 5.137477955 | 3.1849 | 2.30E-09   |
| AT4G22666 | 38.9489784  | 4.336219926 | 3.1671 | 7.32E-08   |
| AT2G38380 | 561.6146635 | 62.87518892 | 3.159  | 8.66E-108  |
| AT2G34610 | 15.5425852  | 1.743914535 | 3.1558 | 0.0016771  |
| AT5G06330 | 16.328966   | 1.838180186 | 3.1511 | 0.0012179  |
| AT5G54230 | 31.36271657 | 3.534961896 | 3.1493 | 2.05E-06   |
| AT1G52070 | 87.28826868 | 9.945026134 | 3.1337 | 6.97E-17   |
| AT5G06640 | 101.8131846 | 11.64180784 | 3.1285 | 1.31E-19   |
| AT1G13250 | 13.9698236  | 1.602516059 | 3.1239 | 0.0034042  |
| AT3G48100 | 37.70002066 | 4.336219926 | 3.1201 | 1.53E-07   |
| AT5G37690 | 55.13917132 | 6.362931413 | 3.1153 | 8.93E-11   |
| AT2G22920 | 50.42088652 | 5.844470334 | 3.1089 | 7.07E-10   |
| AT1G73620 | 18.6418507  | 2.168109963 | 3.104  | 0.00050538 |
| AT4G35060 | 48.38554798 | 5.655939033 | 3.0967 | 1.79E-09   |

|           |             |             |        |            |
|-----------|-------------|-------------|--------|------------|
| AT4G29140 | 22.43498162 | 2.639438216 | 3.0874 | 0.00010759 |
| AT4G05200 | 17.57792374 | 2.073844312 | 3.0834 | 0.00082131 |
| AT4G21230 | 19.65951997 | 2.356641264 | 3.0604 | 0.00036345 |
| AT1G28130 | 48.66309415 | 5.844470334 | 3.0577 | 1.98E-09   |
| AT4G26850 | 82.38495311 | 9.897893308 | 3.0572 | 1.22E-15   |
| AT5G26010 | 18.41056223 | 2.215242788 | 3.055  | 0.00061681 |
| AT1G13080 | 29.32737803 | 3.534961896 | 3.0525 | 6.72E-06   |
| AT5G62720 | 29.5586665  | 3.582094721 | 3.0447 | 6.29E-06   |
| AT1G65060 | 72.30077581 | 8.766705502 | 3.0439 | 1.01E-13   |
| AT3G49120 | 197.612869  | 23.99060807 | 3.0421 | 7.09E-37   |
| AT1G03820 | 30.66885116 | 3.723493197 | 3.042  | 3.99E-06   |
| AT2G01520 | 949.1616243 | 115.8524845 | 3.0344 | 5.07E-176  |
| AT5G53110 | 28.91105879 | 3.534961896 | 3.0319 | 8.62E-06   |
| AT5G66460 | 15.03375057 | 1.838180186 | 3.0319 | 0.0025565  |
| AT2G37460 | 19.56700459 | 2.403774089 | 3.025  | 0.00040738 |
| AT2G43920 | 258.3029636 | 32.09745401 | 3.0085 | 1.14E-47   |

|           |             |             |        |            |
|-----------|-------------|-------------|--------|------------|
| AT2G41370 | 20.39964308 | 2.545172565 | 3.0027 | 0.00030574 |
| AT3G52740 | 32.10283968 | 4.006290149 | 3.0024 | 2.55E-06   |
| AT4G33610 | 73.31844508 | 9.238033754 | 2.9885 | 1.07E-13   |
| AT1G66800 | 32.88922047 | 4.147688624 | 2.9872 | 1.97E-06   |
| AT1G70850 | 2617.075299 | 332.2864182 | 2.9775 | 0          |
| AT2G32990 | 74.84494898 | 9.520830706 | 2.9747 | 6.37E-14   |
| AT5G61420 | 31.77903582 | 4.053422974 | 2.9709 | 3.28E-06   |
| AT4G04850 | 20.58467386 | 2.639438216 | 2.9633 | 0.00031162 |
| AT4G37470 | 53.52015202 | 6.881392491 | 2.9593 | 4.81E-10   |
| AT3G26210 | 25.99682406 | 3.346430595 | 2.9576 | 3.58E-05   |
| AT4G36610 | 35.75719751 | 4.619016877 | 2.9526 | 6.96E-07   |
| AT5G48800 | 15.68135829 | 2.026711487 | 2.9518 | 0.0022706  |
| AT3G09925 | 16.74528525 | 2.168109963 | 2.9492 | 0.0015004  |
| AT5G06630 | 45.61008634 | 5.938735985 | 2.9411 | 1.35E-08   |
| AT5G49270 | 18.36430454 | 2.403774089 | 2.9335 | 0.00081535 |
| AT1G67195 | 24.79412401 | 3.252164944 | 2.9305 | 6.32E-05   |

|           |             |             |        |            |
|-----------|-------------|-------------|--------|------------|
| AT5G64940 | 34.73952824 | 4.571884052 | 2.9257 | 1.18E-06   |
| AT5G50100 | 21.41731235 | 2.827969517 | 2.9209 | 0.0002484  |
| AT3G21560 | 130.4929549 | 17.3448797  | 2.9114 | 1.47E-23   |
| AT4G00700 | 38.62517454 | 5.184610781 | 2.8972 | 2.83E-07   |
| AT1G54540 | 19.56700459 | 2.639438216 | 2.8901 | 0.00056051 |
| AT4G33960 | 15.68135829 | 2.120977138 | 2.8862 | 0.0025693  |
| AT1G13300 | 108.4280349 | 14.75257431 | 2.8777 | 1.94E-19   |
| AT5G24090 | 19.01191226 | 2.59230539  | 2.8746 | 0.00072006 |
| AT4G14440 | 48.15425951 | 6.598595539 | 2.8674 | 7.41E-09   |
| AT3G29250 | 101.4431231 | 13.90418346 | 2.8671 | 3.80E-18   |
| AT1G54010 | 43.66726319 | 5.98586881  | 2.8669 | 4.46E-08   |
| AT1G10470 | 122.3516008 | 16.82641862 | 2.8622 | 8.82E-22   |
| AT4G12030 | 27.75461643 | 3.817758848 | 2.8619 | 2.43E-05   |
| AT1G23010 | 36.63609369 | 5.043212305 | 2.8609 | 7.33E-07   |
| AT1G18870 | 18.13301607 | 2.49803974  | 2.8598 | 0.0010474  |
| AT3G20100 | 56.34187136 | 7.776916171 | 2.8569 | 3.09E-10   |

|           |             |             |        |           |
|-----------|-------------|-------------|--------|-----------|
| AT1G07610 | 285.2249416 | 39.40304193 | 2.8557 | 2.96E-50  |
| AT3G55120 | 235.4979204 | 32.56878227 | 2.8542 | 1.62E-41  |
| AT2G19970 | 17.71669682 | 2.450906914 | 2.8537 | 0.0012502 |
| AT5G13630 | 44.08358244 | 6.127267286 | 2.8469 | 4.22E-08  |
| AT1G42550 | 36.86738216 | 5.137477955 | 2.8432 | 7.27E-07  |
| AT3G62270 | 90.98888421 | 12.72586283 | 2.8379 | 3.59E-16  |
| AT4G30450 | 60.92138307 | 8.672439851 | 2.8124 | 7.01E-11  |
| AT3G50740 | 121.2876738 | 17.39201253 | 2.8019 | 3.49E-21  |
| AT2G40320 | 16.328966   | 2.356641264 | 2.7926 | 0.0024066 |
| AT1G13970 | 16.97657372 | 2.450906914 | 2.7922 | 0.0018884 |
| AT5G07475 | 29.37363573 | 4.241954275 | 2.7917 | 1.68E-05  |
| AT5G53370 | 96.30851903 | 13.95131628 | 2.7873 | 8.12E-17  |
| AT3G16450 | 785.7331912 | 113.825773  | 2.7872 | 3.30E-135 |
| AT4G20390 | 88.16716487 | 12.77299565 | 2.7871 | 1.98E-15  |
| AT2G28250 | 69.57157186 | 10.08642461 | 2.7861 | 2.93E-12  |
| AT3G44310 | 191.0905341 | 27.71410126 | 2.7856 | 5.44E-33  |

|           |             |             |        |            |
|-----------|-------------|-------------|--------|------------|
| AT5G08050 | 18.50307762 | 2.686571041 | 2.7839 | 0.0010799  |
| AT1G07590 | 567.6281638 | 82.48244424 | 2.7828 | 1.45E-97   |
| AT2G47360 | 15.49632751 | 2.262375613 | 2.776  | 0.003404   |
| AT3G51820 | 22.20369315 | 3.252164944 | 2.7713 | 0.00027407 |
| AT5G45380 | 52.59499814 | 7.824048996 | 2.7489 | 2.82E-09   |
| AT4G19690 | 134.0547974 | 19.98431792 | 2.7459 | 5.97E-23   |
| AT2G48140 | 72.85586814 | 10.88768264 | 2.7423 | 1.23E-12   |
| AT1G80240 | 57.54457141 | 8.672439851 | 2.7302 | 4.90E-10   |
| AT1G78120 | 58.60849837 | 8.860971152 | 2.7256 | 3.39E-10   |
| AT4G19030 | 39.87413228 | 6.033001636 | 2.7245 | 4.12E-07   |
| AT4G37070 | 64.43696782 | 9.756494833 | 2.7235 | 3.71E-11   |
| AT5G14200 | 157.9237675 | 23.94347524 | 2.7215 | 9.60E-27   |
| AT1G18290 | 14.98749287 | 2.309508439 | 2.6981 | 0.0048274  |
| AT1G79410 | 22.62001239 | 3.487829071 | 2.6972 | 0.00029151 |
| AT4G01440 | 37.23744372 | 5.750204684 | 2.6951 | 1.29E-06   |
| AT1G07090 | 21.0009931  | 3.252164944 | 2.691  | 0.00054055 |

|           |             |             |        |           |
|-----------|-------------|-------------|--------|-----------|
| AT5G42590 | 17.85546991 | 2.780836691 | 2.6828 | 0.0017402 |
| AT4G25090 | 29.88247036 | 4.666149703 | 2.679  | 2.13E-05  |
| AT1G75500 | 255.2036981 | 40.01576866 | 2.673  | 2.63E-42  |
| AT4G21740 | 20.12209691 | 3.157899294 | 2.6717 | 0.0007835 |
| AT1G31050 | 45.51757095 | 7.164189442 | 2.6675 | 6.92E-08  |
| AT5G13580 | 46.53524022 | 7.399853569 | 2.6528 | 5.22E-08  |
| AT4G11190 | 37.3299591  | 5.938735985 | 2.6521 | 1.54E-06  |
| AT2G16750 | 91.63649193 | 14.70544149 | 2.6396 | 3.08E-15  |
| AT5G05270 | 305.3007808 | 49.01813829 | 2.6388 | 5.99E-50  |
| AT4G13770 | 81.13599537 | 13.0557926  | 2.6357 | 1.65E-13  |
| AT3G59370 | 58.46972529 | 9.426565056 | 2.6329 | 7.38E-10  |
| AT2G22510 | 125.3583509 | 20.21998204 | 2.6322 | 1.22E-20  |
| AT5G01840 | 17.53166605 | 2.827969517 | 2.6321 | 0.0021941 |
| AT1G73650 | 54.90788284 | 8.860971152 | 2.6315 | 2.75E-09  |
| AT1G02810 | 117.4945429 | 18.99452859 | 2.6289 | 2.36E-19  |
| AT2G01900 | 18.04050068 | 2.922235167 | 2.6261 | 0.0018599 |



|           |             |             |        |            |
|-----------|-------------|-------------|--------|------------|
| AT1G69310 | 63.92813319 | 10.36922156 | 2.6241 | 1.06E-10   |
| AT1G58360 | 28.44848184 | 4.619016877 | 2.6227 | 4.49E-05   |
| AT4G20820 | 51.06849424 | 8.295377249 | 2.6221 | 1.20E-08   |
| AT2G37970 | 196.5026844 | 31.95605554 | 2.6204 | 5.06E-32   |
| AT3G54590 | 140.9471938 | 23.04795156 | 2.6124 | 5.30E-23   |
| AT5G57150 | 60.7363523  | 9.992158959 | 2.6037 | 4.10E-10   |
| AT5G25460 | 141.82609   | 23.37788134 | 2.6009 | 4.81E-23   |
| AT2G40480 | 55.97180981 | 9.238033754 | 2.599  | 2.38E-09   |
| AT1G12110 | 190.1653803 | 31.67325859 | 2.5859 | 1.32E-30   |
| AT1G72430 | 46.07266328 | 7.68265052  | 2.5842 | 9.52E-08   |
| AT1G79620 | 21.13976618 | 3.534961896 | 2.5802 | 0.00070045 |
| AT2G21100 | 16.328966   | 2.733703866 | 2.5785 | 0.0037988  |
| AT2G23610 | 77.8516991  | 13.0557926  | 2.576  | 1.05E-12   |
| AT4G40090 | 33.12050894 | 5.561673383 | 2.5741 | 1.03E-05   |
| AT3G26300 | 24.33154707 | 4.100555799 | 2.5689 | 0.00023444 |
| AT3G26440 | 82.75501467 | 13.95131628 | 2.5684 | 1.95E-13   |

|           |             |             |        |            |
|-----------|-------------|-------------|--------|------------|
| AT5G42500 | 32.01032429 | 5.420274907 | 2.5621 | 1.62E-05   |
| AT2G34080 | 20.2146123  | 3.440696245 | 2.5546 | 0.0010404  |
| AT5G24930 | 57.03573677 | 9.709362007 | 2.5544 | 2.30E-09   |
| AT4G00080 | 23.45265089 | 4.006290149 | 2.5494 | 0.00034114 |
| AT4G18640 | 44.3611286  | 7.58838487  | 2.5474 | 2.19E-07   |
| AT4G25820 | 33.86063205 | 5.797337509 | 2.5461 | 9.03E-06   |
| AT3G54600 | 35.20210518 | 6.033001636 | 2.5447 | 5.67E-06   |
| AT3G44326 | 30.66885116 | 5.278876431 | 2.5385 | 2.85E-05   |
| AT5G25810 | 56.34187136 | 9.709362007 | 2.5368 | 3.40E-09   |
| AT2G15620 | 205.6154501 | 35.44388461 | 2.5363 | 1.96E-32   |
| AT1G74460 | 104.5886463 | 18.05187208 | 2.5345 | 1.16E-16   |
| AT1G72200 | 19.33571612 | 3.346430595 | 2.5306 | 0.0015061  |
| AT3G32980 | 991.3023836 | 172.0348123 | 2.5266 | 4.79E-155  |
| AT1G13930 | 1169.625794 | 203.4724067 | 2.5231 | 1.15E-182  |
| AT5G53250 | 87.42704177 | 15.27103539 | 2.5173 | 6.75E-14   |
| AT5G51110 | 19.89080844 | 3.487829071 | 2.5117 | 0.0013094  |

|           |             |             |        |            |
|-----------|-------------|-------------|--------|------------|
| AT3G58810 | 27.93964721 | 4.901813829 | 2.5109 | 8.29E-05   |
| AT2G17500 | 226.1538662 | 39.73297171 | 2.5089 | 2.91E-35   |
| AT1G77760 | 72.90212583 | 12.82012848 | 2.5076 | 1.27E-11   |
| AT5G23010 | 61.84653695 | 10.88768264 | 2.506  | 6.34E-10   |
| AT5G57625 | 25.30295865 | 4.477618401 | 2.4985 | 0.0002132  |
| AT5G23190 | 43.5747478  | 7.776916171 | 2.4862 | 4.20E-07   |
| AT3G20110 | 34.55449746 | 6.174400111 | 2.4845 | 9.54E-06   |
| AT2G21960 | 20.44590077 | 3.676360372 | 2.4755 | 0.0011998  |
| AT5G67400 | 25.90430867 | 4.666149703 | 2.4729 | 0.00019041 |
| AT3G60550 | 34.2306936  | 6.174400111 | 2.4709 | 1.14E-05   |
| AT5G10130 | 33.16676664 | 5.98586881  | 2.4701 | 1.64E-05   |
| AT3G22620 | 150.1062172 | 27.10137453 | 2.4695 | 3.79E-23   |
| AT5G58770 | 21.37105465 | 3.864891673 | 2.4672 | 0.00090014 |
| AT4G30470 | 82.80127236 | 14.98823844 | 2.4658 | 6.36E-13   |
| AT3G24300 | 98.8526922  | 17.91047361 | 2.4645 | 2.41E-15   |
| AT4G25640 | 406.9751923 | 73.81000439 | 2.4631 | 4.01E-62   |

|           |             |             |        |            |
|-----------|-------------|-------------|--------|------------|
| AT4G18020 | 27.2457818  | 4.948946654 | 2.4608 | 0.00012677 |
| AT3G21260 | 46.85904408 | 8.531041375 | 2.4575 | 1.65E-07   |
| AT4G37750 | 19.89080844 | 3.629227546 | 2.4544 | 0.0015308  |
| AT1G48500 | 31.22394349 | 5.703071859 | 2.4528 | 3.41E-05   |
| AT4G13620 | 19.05816995 | 3.487829071 | 2.45   | 0.0020413  |
| AT3G43670 | 49.35695956 | 9.049502453 | 2.4473 | 7.54E-08   |
| AT5G66040 | 341.5668129 | 62.63952479 | 2.447  | 8.41E-52   |
| AT1G49500 | 82.98630314 | 15.27103539 | 2.4421 | 7.95E-13   |
| AT3G19030 | 493.5233379 | 91.06061844 | 2.4382 | 1.62E-74   |
| AT4G15765 | 18.13301607 | 3.346430595 | 2.4379 | 0.0028661  |
| AT2G22590 | 42.788367   | 7.918314647 | 2.434  | 7.54E-07   |
| AT2G26355 | 79.42446069 | 14.70544149 | 2.4332 | 2.98E-12   |
| AT2G47540 | 22.06492006 | 4.100555799 | 2.4279 | 0.0008062  |
| AT1G10960 | 33.4443128  | 6.221532937 | 2.4264 | 1.83E-05   |
| AT2G26980 | 86.82569174 | 16.16655907 | 2.4251 | 2.64E-13   |
| AT4G11320 | 982.5134218 | 183.2524247 | 2.4226 | 3.22E-147  |

|           |             |             |        |            |
|-----------|-------------|-------------|--------|------------|
| AT4G02075 | 17.9017276  | 3.346430595 | 2.4194 | 0.0032352  |
| AT5G38030 | 71.37562193 | 13.38572238 | 2.4147 | 5.70E-11   |
| AT1G49430 | 40.05916305 | 7.541252044 | 2.4093 | 2.20E-06   |
| AT2G30840 | 24.28528938 | 4.571884052 | 2.4092 | 0.00040925 |
| AT3G16420 | 2750.575004 | 517.942617  | 2.4089 | 0          |
| AT3G04110 | 16.88405833 | 3.205032119 | 2.3973 | 0.0048104  |
| AT5G65380 | 234.2952204 | 44.68191836 | 2.3906 | 9.23E-35   |
| AT4G02270 | 32.24161276 | 6.174400111 | 2.3846 | 3.31E-05   |
| AT4G24130 | 94.45821126 | 18.09900491 | 2.3838 | 3.45E-14   |
| AT4G22160 | 18.36430454 | 3.534961896 | 2.3771 | 0.0031007  |
| AT1G80050 | 44.77744785 | 8.625307026 | 2.3761 | 5.63E-07   |
| AT4G27654 | 77.94421448 | 15.03537126 | 2.3741 | 9.79E-12   |
| AT4G29020 | 26.36688561 | 5.09034513  | 2.3729 | 0.00023641 |
| AT1G30650 | 34.64701285 | 6.692861189 | 2.372  | 1.62E-05   |
| AT4G32650 | 87.79710332 | 16.9678171  | 2.3714 | 3.78E-13   |
| AT2G23600 | 31.68652043 | 6.127267286 | 2.3706 | 4.26E-05   |

|           |             |             |        |            |
|-----------|-------------|-------------|--------|------------|
| AT5G26280 | 913.4506845 | 176.7480948 | 2.3696 | 8.43E-134  |
| AT3G63540 | 26.22811253 | 5.09034513  | 2.3653 | 0.0002548  |
| AT5G38020 | 100.1016499 | 19.51298967 | 2.359  | 7.39E-15   |
| AT1G72230 | 30.94639732 | 6.033001636 | 2.3588 | 5.72E-05   |
| AT4G30670 | 47.4603941  | 9.28516658  | 2.3537 | 2.72E-07   |
| AT3G63520 | 131.233078  | 25.68738978 | 2.353  | 2.60E-19   |
| AT1G65985 | 43.48223241 | 8.531041375 | 2.3496 | 1.02E-06   |
| AT1G71960 | 28.58725493 | 5.608806208 | 2.3496 | 0.000127   |
| AT2G41660 | 110.0933119 | 21.6339668  | 2.3474 | 3.26E-16   |
| AT5G41140 | 66.74985252 | 13.15005825 | 2.3437 | 5.47E-10   |
| AT2G25810 | 39.18026687 | 7.729783346 | 2.3416 | 4.33E-06   |
| AT5G38010 | 26.87572025 | 5.326009256 | 2.3352 | 0.00023255 |
| AT5G40890 | 206.1705424 | 40.91129234 | 2.3333 | 7.34E-30   |
| AT5G60660 | 89.55489569 | 17.81620796 | 2.3296 | 3.68E-13   |
| AT1G16060 | 23.40639319 | 4.713282528 | 2.3121 | 0.00076229 |
| AT1G52060 | 35.34087826 | 7.164189442 | 2.3025 | 1.83E-05   |

|           |             |             |        |            |
|-----------|-------------|-------------|--------|------------|
| AT4G30190 | 1440.557108 | 292.1292511 | 2.3019 | 1.75E-204  |
| AT2G44230 | 22.75878548 | 4.619016877 | 2.3008 | 0.00097113 |
| AT3G45410 | 27.75461643 | 5.655939033 | 2.2949 | 0.000207   |
| AT4G29720 | 35.38713595 | 7.211322268 | 2.2949 | 1.88E-05   |
| AT5G42860 | 46.95155947 | 9.567963531 | 2.2949 | 4.82E-07   |
| AT5G21020 | 489.128857  | 99.78019111 | 2.2934 | 2.97E-69   |
| AT5G24380 | 35.75719751 | 7.305587918 | 2.2912 | 1.71E-05   |
| AT1G31070 | 84.79035321 | 17.3448797  | 2.2894 | 2.91E-12   |
| AT3G45650 | 63.41929855 | 13.00865978 | 2.2854 | 2.80E-09   |
| AT4G12880 | 142.0573784 | 29.17521885 | 2.2837 | 3.19E-20   |
| AT2G32430 | 24.19277399 | 4.996079479 | 2.2757 | 0.00067731 |
| AT1G64390 | 123.9243624 | 25.59312413 | 2.2756 | 1.28E-17   |
| AT2G25530 | 31.45523196 | 6.504329888 | 2.2738 | 7.18E-05   |
| AT5G64120 | 316.9577197 | 65.60889279 | 2.2723 | 1.74E-44   |
| AT1G53090 | 22.75878548 | 4.713282528 | 2.2716 | 0.0010668  |
| AT3G25110 | 51.3922981  | 10.65201851 | 2.2704 | 1.43E-07   |

|           |             |             |        |            |
|-----------|-------------|-------------|--------|------------|
| AT1G52750 | 26.92197794 | 5.608806208 | 2.263  | 0.00030484 |
| AT2G46430 | 23.96148552 | 4.996079479 | 2.2618 | 0.00076364 |
| AT5G17050 | 111.0647234 | 23.33074851 | 2.2511 | 1.19E-15   |
| AT5G22020 | 194.4210881 | 40.91129234 | 2.2486 | 4.33E-27   |
| AT5G03760 | 55.97180981 | 11.78320632 | 2.248  | 4.11E-08   |
| AT1G08990 | 20.07583922 | 4.241954275 | 2.2427 | 0.0026511  |
| AT1G01580 | 48.89438262 | 10.36922156 | 2.2374 | 3.97E-07   |
| AT5G44550 | 125.4046086 | 26.63004628 | 2.2355 | 1.72E-17   |
| AT5G03570 | 23.03633164 | 4.901813829 | 2.2325 | 0.0011192  |
| AT3G56940 | 23.91522783 | 5.09034513  | 2.2321 | 0.00086144 |
| AT4G26320 | 49.7732788  | 10.60488569 | 2.2306 | 3.19E-07   |
| AT3G18170 | 30.02124344 | 6.410064238 | 2.2276 | 0.00013708 |
| AT1G74090 | 47.09033255 | 10.13355743 | 2.2163 | 8.01E-07   |
| AT3G62040 | 68.36887182 | 14.75257431 | 2.2124 | 1.25E-09   |
| AT5G26290 | 65.63966787 | 14.18698041 | 2.21   | 2.93E-09   |
| AT2G28160 | 32.657932   | 7.069923792 | 2.2077 | 6.81E-05   |



|           |             |             |        |           |
|-----------|-------------|-------------|--------|-----------|
| AT1G50250 | 68.09132565 | 14.75257431 | 2.2065 | 1.44E-09  |
| AT1G12380 | 21.09350849 | 4.571884052 | 2.2059 | 0.0021815 |
| AT1G72160 | 190.4891841 | 41.38262059 | 2.2026 | 5.87E-26  |
| AT3G45780 | 36.5435783  | 7.965447472 | 2.1978 | 2.22E-05  |
| AT1G30840 | 57.86837526 | 12.63159717 | 2.1957 | 3.61E-08  |
| AT2G41310 | 56.0180675  | 12.25453457 | 2.1926 | 6.47E-08  |
| AT3G02020 | 33.90688974 | 7.446986394 | 2.1868 | 5.20E-05  |
| AT1G06650 | 19.52074689 | 4.2890871   | 2.1863 | 0.0036932 |
| AT1G02730 | 29.14234726 | 6.410064238 | 2.1847 | 0.0002157 |
| AT5G23020 | 219.4927583 | 48.40541156 | 2.1809 | 1.52E-29  |
| AT1G74930 | 84.92912629 | 18.80599729 | 2.1751 | 1.23E-11  |
| AT2G17820 | 42.8346247  | 9.520830706 | 2.1696 | 4.01E-06  |
| AT1G56010 | 51.06849424 | 11.40614372 | 2.1626 | 3.63E-07  |
| AT3G23510 | 49.58824803 | 11.07621394 | 2.1625 | 5.64E-07  |
| AT5G61480 | 38.81020531 | 8.672439851 | 2.1619 | 1.39E-05  |
| AT5G46900 | 42.97339778 | 9.615096357 | 2.1601 | 4.10E-06  |

|           |             |             |        |            |
|-----------|-------------|-------------|--------|------------|
| AT3G20015 | 36.5435783  | 8.201111598 | 2.1557 | 2.80E-05   |
| AT5G48412 | 152.3265865 | 34.21843115 | 2.1543 | 2.46E-20   |
| AT2G31790 | 35.20210518 | 7.918314647 | 2.1524 | 4.25E-05   |
| AT3G16430 | 195.2074689 | 43.92779316 | 2.1518 | 6.35E-26   |
| AT1G72180 | 26.59817408 | 5.98586881  | 2.1517 | 0.00052701 |
| AT1G11460 | 27.84713182 | 6.268665762 | 2.1513 | 0.00036615 |
| AT5G19940 | 22.94381625 | 5.184610781 | 2.1458 | 0.0015448  |
| AT5G21950 | 20.76970463 | 4.713282528 | 2.1397 | 0.0029526  |
| AT5G10280 | 31.54774735 | 7.164189442 | 2.1387 | 0.00013201 |
| AT2G24580 | 58.70101376 | 13.33858955 | 2.1378 | 4.72E-08   |
| AT1G21910 | 66.98114099 | 15.22390256 | 2.1374 | 4.11E-09   |
| AT3G14940 | 301.183846  | 68.67252643 | 2.1328 | 1.92E-39   |
| AT1G11450 | 27.84713182 | 6.362931413 | 2.1298 | 0.00039954 |
| AT5G09530 | 321.5834891 | 73.57434026 | 2.1279 | 5.57E-42   |
| AT4G13860 | 34.97081671 | 8.012580297 | 2.1258 | 5.24E-05   |
| AT3G30875 | 40.52173999 | 9.28516658  | 2.1257 | 1.05E-05   |

|           |             |             |        |           |
|-----------|-------------|-------------|--------|-----------|
| AT1G30270 | 186.5572801 | 42.79660535 | 2.1241 | 1.94E-24  |
| AT2G33250 | 24.37780477 | 5.608806208 | 2.1198 | 0.0011268 |
| AT5G22940 | 23.3138778  | 5.373142082 | 2.1174 | 0.0015353 |
| AT1G74470 | 56.8044483  | 13.10292543 | 2.1161 | 9.98E-08  |
| AT3G57010 | 71.00556038 | 16.4022232  | 2.114  | 1.62E-09  |
| AT4G31890 | 19.33571612 | 4.477618401 | 2.1105 | 0.0048844 |
| AT1G28400 | 298.0383228 | 69.09672186 | 2.1088 | 1.53E-38  |
| AT3G52370 | 47.73794027 | 11.07621394 | 2.1077 | 1.46E-06  |
| AT3G22600 | 311.6843426 | 72.67881658 | 2.1005 | 4.08E-40  |
| AT5G40730 | 54.12150205 | 12.63159717 | 2.0992 | 2.50E-07  |
| AT1G18880 | 90.20250341 | 21.11550572 | 2.0949 | 7.73E-12  |
| AT5G42250 | 68.97022184 | 16.16655907 | 2.093  | 3.69E-09  |
| AT4G29800 | 24.51657785 | 5.750204684 | 2.0921 | 0.0012026 |
| AT2G05440 | 3925.520433 | 920.7397418 | 2.092  | 0         |
| AT3G52900 | 19.89080844 | 4.666149703 | 2.0918 | 0.0044083 |
| AT5G66490 | 29.51240881 | 6.928525316 | 2.0907 | 0.0002955 |

|           |             |             |        |            |
|-----------|-------------|-------------|--------|------------|
| AT5G60890 | 61.01389846 | 14.32837888 | 2.0903 | 3.75E-08   |
| AT2G31585 | 44.54615938 | 10.46348721 | 2.0899 | 4.16E-06   |
| AT3G11720 | 27.2457818  | 6.410064238 | 2.0876 | 0.00056973 |
| AT3G50640 | 20.81596233 | 4.901813829 | 2.0863 | 0.0034374  |
| AT1G65310 | 52.64125584 | 12.44306587 | 2.0809 | 4.42E-07   |
| AT4G31730 | 32.47290123 | 7.68265052  | 2.0796 | 0.00013525 |
| AT3G28050 | 46.99781716 | 11.12334677 | 2.079  | 2.24E-06   |
| AT1G78060 | 95.79968439 | 22.71802178 | 2.0762 | 2.00E-12   |
| AT3G45160 | 90.43379188 | 21.4454355  | 2.0762 | 9.43E-12   |
| AT5G22740 | 188.5926187 | 44.72905119 | 2.076  | 4.42E-24   |
| AT1G70370 | 95.01330359 | 22.57662331 | 2.0733 | 2.62E-12   |
| AT1G07560 | 23.59142397 | 5.608806208 | 2.0725 | 0.0016689  |
| AT1G80870 | 30.48382038 | 7.258455093 | 2.0703 | 0.00024659 |
| AT1G53940 | 39.31903995 | 9.426565056 | 2.0604 | 2.20E-05   |
| AT4G04810 | 28.30970876 | 6.78712684  | 2.0604 | 0.00047345 |
| AT1G04280 | 77.0190606  | 18.47606751 | 2.0596 | 5.44E-10   |

|           |             |             |        |            |
|-----------|-------------|-------------|--------|------------|
| AT5G24120 | 22.34246623 | 5.373142082 | 2.056  | 0.0024966  |
| AT5G42825 | 50.37462883 | 12.16026892 | 2.0505 | 1.07E-06   |
| AT5G67070 | 22.62001239 | 5.467407732 | 2.0487 | 0.0023729  |
| AT1G73885 | 36.40480522 | 8.813838327 | 2.0463 | 5.41E-05   |
| AT2G45750 | 45.51757095 | 11.02908112 | 2.0451 | 4.33E-06   |
| AT4G12480 | 46.25769406 | 11.21761242 | 2.0439 | 3.56E-06   |
| AT3G51950 | 192.5707804 | 46.8028955  | 2.0407 | 4.14E-24   |
| AT3G54720 | 27.66210105 | 6.739994015 | 2.0371 | 0.00062702 |
| AT4G24780 | 107.2253348 | 26.30011651 | 2.0275 | 1.73E-13   |
| AT2G30210 | 66.51856405 | 16.35509037 | 2.024  | 1.54E-08   |
| AT4G28410 | 22.01866237 | 5.420274907 | 2.0223 | 0.0030558  |
| AT1G64590 | 42.23327467 | 10.41635439 | 2.0195 | 1.29E-05   |
| AT4G23400 | 240.5862668 | 59.38735985 | 2.0183 | 1.16E-29   |
| AT2G01830 | 92.05281117 | 22.76515461 | 2.0156 | 1.42E-11   |
| AT5G07680 | 22.43498162 | 5.561673383 | 2.0122 | 0.0028323  |
| AT2G18570 | 32.657932   | 8.106845948 | 2.0102 | 0.00018225 |

|           |             |             |        |            |
|-----------|-------------|-------------|--------|------------|
| AT3G23470 | 41.2156054  | 10.27495591 | 2.0041 | 1.86E-05   |
| AT4G36180 | 45.9338902  | 11.45327654 | 2.0038 | 5.21E-06   |
| AT2G13820 | 60.45880613 | 15.12963691 | 1.9986 | 1.05E-07   |
| AT2G31570 | 123.6468162 | 30.96626621 | 1.9975 | 3.03E-15   |
| AT4G38620 | 58.28469451 | 14.61117584 | 1.996  | 1.93E-07   |
| AT2G05380 | 123.36927   | 31.01339903 | 1.992  | 3.64E-15   |
| AT1G22550 | 55.83303673 | 14.04558193 | 1.991  | 3.92E-07   |
| AT5G12940 | 33.76811666 | 8.531041375 | 1.9849 | 0.00015436 |
| AT5G43630 | 102.0444731 | 25.82878825 | 1.9821 | 1.52E-12   |
| AT3G06125 | 34.97081671 | 8.860971152 | 1.9806 | 0.00011484 |
| AT4G15480 | 28.26345107 | 7.164189442 | 1.9801 | 0.00068327 |
| AT4G00370 | 40.56799769 | 10.32208874 | 1.9746 | 2.68E-05   |
| AT3G19370 | 205.9392539 | 52.55310018 | 1.9704 | 9.67E-25   |
| AT4G32460 | 28.0321626  | 7.164189442 | 1.9682 | 0.00076404 |
| AT2G02130 | 421.7313967 | 107.8870371 | 1.9668 | 2.96E-50   |
| AT5G59090 | 308.0299847 | 79.04174799 | 1.9624 | 1.10E-36   |

|           |             |             |        |            |
|-----------|-------------|-------------|--------|------------|
| AT5G52882 | 148.0708787 | 38.4132526  | 1.9466 | 1.21E-17   |
| AT4G17250 | 31.03891271 | 8.059713123 | 1.9453 | 0.00038711 |
| AT5G40830 | 33.72185897 | 8.766705502 | 1.9436 | 0.00019423 |
| AT5G17160 | 27.15326641 | 7.069923792 | 1.9414 | 0.0010771  |
| AT3G22800 | 64.94580246 | 16.92068427 | 1.9404 | 5.62E-08   |
| AT1G45130 | 105.9763771 | 27.61983561 | 1.94   | 1.08E-12   |
| AT1G30870 | 32.98173586 | 8.625307026 | 1.935  | 0.00024608 |
| AT3G45070 | 31.17768579 | 8.153978773 | 1.9349 | 0.00039217 |
| AT3G16770 | 146.5906325 | 38.50751825 | 1.9286 | 2.76E-17   |
| AT3G54770 | 29.5586665  | 7.776916171 | 1.9263 | 0.00062185 |
| AT4G15390 | 185.215807  | 48.87673981 | 1.922  | 1.17E-21   |
| AT4G27860 | 113.1925774 | 29.88221123 | 1.9214 | 2.23E-13   |
| AT2G23340 | 45.56382865 | 12.06600327 | 1.9169 | 1.08E-05   |
| AT1G19210 | 24.00774322 | 6.362931413 | 1.9157 | 0.0026627  |
| AT3G15354 | 27.01449333 | 7.164189442 | 1.9149 | 0.0012508  |
| AT3G20380 | 23.63768166 | 6.268665762 | 1.9149 | 0.0029316  |

|           |             |             |        |            |
|-----------|-------------|-------------|--------|------------|
| AT3G44550 | 51.53107118 | 13.66851933 | 1.9146 | 2.35E-06   |
| AT5G57685 | 129.1977395 | 34.3126968  | 1.9128 | 3.84E-15   |
| AT1G21440 | 62.40162928 | 16.5907545  | 1.9112 | 1.47E-07   |
| AT5G63410 | 25.6730202  | 6.834259665 | 1.9094 | 0.0017968  |
| AT3G03520 | 89.87869955 | 23.94347524 | 1.9083 | 1.23E-10   |
| AT3G48115 | 87.01072252 | 23.23648286 | 1.9048 | 2.74E-10   |
| AT1G22065 | 40.29045152 | 10.79341699 | 1.9003 | 4.65E-05   |
| AT4G27657 | 39.55032842 | 10.65201851 | 1.8926 | 5.89E-05   |
| AT3G19450 | 400.6378882 | 108.2640997 | 1.8877 | 1.64E-45   |
| AT1G30530 | 24.37780477 | 6.598595539 | 1.8853 | 0.0027252  |
| AT3G55990 | 22.38872392 | 6.080134461 | 1.8806 | 0.0045566  |
| AT4G16190 | 410.8608386 | 112.0347257 | 1.8747 | 2.80E-46   |
| AT1G09090 | 31.45523196 | 8.578174201 | 1.8746 | 0.00049391 |
| AT2G05920 | 417.151885  | 113.9200387 | 1.8726 | 6.42E-47   |
| AT2G45470 | 116.2455852 | 31.81465706 | 1.8694 | 2.65E-13   |
| AT1G19715 | 24.79412401 | 6.78712684  | 1.8691 | 0.0026142  |



|           |             |             |        |            |
|-----------|-------------|-------------|--------|------------|
| AT4G02970 | 63.51181394 | 17.39201253 | 1.8686 | 1.70E-07   |
| AT4G39350 | 235.4979204 | 64.57197063 | 1.8667 | 1.64E-26   |
| AT5G08330 | 35.10958979 | 9.662229182 | 1.8614 | 0.00021344 |
| AT1G08320 | 58.00714835 | 15.97802777 | 1.8601 | 7.27E-07   |
| AT3G26520 | 1087.102068 | 299.4819718 | 1.8599 | 4.08E-121  |
| AT5G61820 | 213.8955773 | 58.96316442 | 1.859  | 5.28E-24   |
| AT1G35260 | 42.88088239 | 11.83033914 | 1.8578 | 3.20E-05   |
| AT4G22120 | 62.2628562  | 17.20348123 | 1.8557 | 2.64E-07   |
| AT1G13420 | 34.41572438 | 9.520830706 | 1.8539 | 0.00026403 |
| AT5G42030 | 26.22811253 | 7.258455093 | 1.8534 | 0.0019643  |
| AT4G08930 | 37.97756682 | 10.51062004 | 1.8533 | 0.00011083 |
| AT3G56980 | 26.87572025 | 7.446986394 | 1.8516 | 0.001689   |
| AT4G36640 | 38.76394762 | 10.74628416 | 1.8509 | 9.29E-05   |
| AT3G61270 | 41.2156054  | 11.45327654 | 1.8474 | 5.20E-05   |
| AT2G27840 | 60.41254844 | 16.82641862 | 1.8441 | 4.68E-07   |
| AT3G26330 | 41.72444004 | 11.64180784 | 1.8416 | 4.77E-05   |

|           |             |             |        |            |
|-----------|-------------|-------------|--------|------------|
| AT2G19130 | 31.40897426 | 8.766705502 | 1.8411 | 0.00059156 |
| AT1G55320 | 68.87770645 | 19.27732554 | 1.8371 | 6.27E-08   |
| AT5G55730 | 26.08933945 | 7.305587918 | 1.8364 | 0.0021746  |
| AT2G37180 | 135.3500128 | 37.98905717 | 1.833  | 4.46E-15   |
| AT1G14480 | 60.27377536 | 16.9678171  | 1.8287 | 5.63E-07   |
| AT5G44030 | 37.83879374 | 10.65201851 | 1.8287 | 0.00013282 |
| AT1G12370 | 24.9328971  | 7.022790966 | 1.8279 | 0.0029699  |
| AT3G06035 | 54.30653282 | 15.36530104 | 1.8214 | 2.59E-06   |
| AT1G59970 | 28.30970876 | 8.012580297 | 1.821  | 0.0013699  |
| AT5G10170 | 83.72642624 | 23.75494394 | 1.8175 | 2.08E-09   |
| AT2G41380 | 39.82787458 | 11.31187807 | 1.8159 | 8.94E-05   |
| AT2G42760 | 147.3307556 | 41.85394885 | 1.8156 | 3.45E-16   |
| AT4G37540 | 80.62716074 | 22.90655309 | 1.8155 | 4.53E-09   |
| AT1G75820 | 54.53782129 | 15.50669952 | 1.8144 | 2.60E-06   |
| AT1G69252 | 79.28568761 | 22.62375613 | 1.8092 | 6.84E-09   |
| AT5G11790 | 140.0682976 | 39.96863584 | 1.8092 | 2.39E-15   |

|           |             |             |        |            |
|-----------|-------------|-------------|--------|------------|
| AT1G30510 | 151.956525  | 43.36219926 | 1.8091 | 1.30E-16   |
| AT1G22500 | 49.95830958 | 14.28124606 | 1.8066 | 8.44E-06   |
| AT5G24030 | 45.98014789 | 13.15005825 | 1.8059 | 2.18E-05   |
| AT3G23530 | 110.2783426 | 31.62612576 | 1.802  | 4.11E-12   |
| AT1G11545 | 40.42922461 | 11.59467502 | 1.8019 | 8.48E-05   |
| AT2G02680 | 40.75302846 | 11.68894067 | 1.8018 | 7.87E-05   |
| AT5G26260 | 437.7828165 | 125.986042  | 1.797  | 7.46E-47   |
| AT4G01450 | 95.79968439 | 27.57270279 | 1.7968 | 1.51E-10   |
| AT5G66052 | 55.97180981 | 16.11942625 | 1.7959 | 2.18E-06   |
| AT1G60390 | 39.41155534 | 11.35901089 | 1.7948 | 0.00011258 |
| AT3G57040 | 25.99682406 | 7.494119219 | 1.7945 | 0.002646   |
| AT1G65510 | 41.77069773 | 12.06600327 | 1.7915 | 6.59E-05   |
| AT2G38170 | 30.16001652 | 8.719572676 | 1.7903 | 0.001019   |
| AT5G24290 | 48.52432107 | 14.04558193 | 1.7886 | 1.37E-05   |
| AT1G49860 | 76.00139133 | 22.0110294  | 1.7878 | 2.00E-08   |
| AT1G66200 | 1012.765954 | 293.3075717 | 1.7878 | 1.40E-107  |

|           |             |             |        |            |
|-----------|-------------|-------------|--------|------------|
| AT4G04830 | 391.4326071 | 113.4958433 | 1.7861 | 1.30E-41   |
| AT4G40060 | 137.1540629 | 39.96863584 | 1.7789 | 9.73E-15   |
| AT5G16590 | 61.61524848 | 17.95760643 | 1.7787 | 6.66E-07   |
| AT1G73330 | 1034.322039 | 301.5558161 | 1.7782 | 3.93E-109  |
| AT1G54000 | 417.4294312 | 121.8854862 | 1.776  | 4.62E-44   |
| AT3G50060 | 67.30494485 | 19.65438814 | 1.7759 | 1.80E-07   |
| AT5G15910 | 45.28628248 | 13.2443239  | 1.7737 | 3.25E-05   |
| AT1G68710 | 29.32737803 | 8.578174201 | 1.7735 | 0.0013409  |
| AT5G24850 | 35.24836287 | 10.32208874 | 1.7718 | 0.00034248 |
| AT5G46790 | 41.95572851 | 12.3016674  | 1.77   | 7.31E-05   |
| AT3G27170 | 51.3460404  | 15.08250409 | 1.7674 | 8.37E-06   |
| AT2G36380 | 396.5209535 | 116.5123441 | 1.7669 | 1.33E-41   |
| AT5G56530 | 41.86321312 | 12.3016674  | 1.7668 | 7.64E-05   |
| AT5G65390 | 80.9509646  | 23.94347524 | 1.7574 | 9.04E-09   |
| AT3G54810 | 220.3253968 | 65.32609584 | 1.7539 | 4.75E-23   |
| AT4G23510 | 26.36688561 | 7.824048996 | 1.7527 | 0.0028888  |

|           |             |             |        |            |
|-----------|-------------|-------------|--------|------------|
| AT1G51850 | 45.42505556 | 13.52712085 | 1.7476 | 3.81E-05   |
| AT5G60450 | 42.23327467 | 12.58446435 | 1.7467 | 8.05E-05   |
| AT2G39890 | 38.76394762 | 11.59467502 | 1.7413 | 0.00018277 |
| AT4G38080 | 279.9978221 | 84.03782747 | 1.7363 | 7.62E-29   |
| AT1G77690 | 139.9757822 | 42.04248015 | 1.7353 | 1.36E-14   |
| AT2G27000 | 45.65634403 | 13.71565216 | 1.735  | 3.98E-05   |
| AT1G01750 | 26.50565869 | 7.965447472 | 1.7345 | 0.0030207  |
| AT2G44940 | 42.51082084 | 12.82012848 | 1.7294 | 8.49E-05   |
| AT4G14130 | 110.1395695 | 33.22864182 | 1.7288 | 1.59E-11   |
| AT4G30460 | 139.4206899 | 42.1367458  | 1.7263 | 1.90E-14   |
| AT4G09750 | 41.16934771 | 12.44306587 | 1.7262 | 0.0001169  |
| AT3G11410 | 69.94163341 | 21.16263855 | 1.7246 | 1.73E-07   |
| AT1G78570 | 507.8169653 | 154.31287   | 1.7185 | 1.98E-51   |
| AT2G28550 | 96.4935498  | 29.36375015 | 1.7164 | 4.56E-10   |
| AT1G47670 | 62.58666006 | 19.08879424 | 1.7131 | 1.04E-06   |
| AT1G01610 | 94.45821126 | 28.84528907 | 1.7113 | 7.85E-10   |

|           |             |             |        |            |
|-----------|-------------|-------------|--------|------------|
| AT4G22130 | 84.37403396 | 25.9230539  | 1.7026 | 8.65E-09   |
| AT1G64640 | 37.00615525 | 11.40614372 | 1.698  | 0.00035382 |
| AT5G66280 | 48.89438262 | 15.08250409 | 1.6968 | 2.58E-05   |
| AT1G78100 | 58.14592143 | 17.95760643 | 1.6951 | 3.35E-06   |
| AT5G44110 | 88.35219565 | 27.38417149 | 1.6899 | 4.25E-09   |
| AT1G04220 | 56.11058289 | 17.39201253 | 1.6898 | 5.56E-06   |
| AT3G57540 | 28.49473954 | 8.860971152 | 1.6852 | 0.0024193  |
| AT5G06390 | 94.73575743 | 29.55228145 | 1.6806 | 1.19E-09   |
| AT3G51860 | 47.22910563 | 14.75257431 | 1.6787 | 4.29E-05   |
| AT4G14760 | 80.76593382 | 25.26319435 | 1.6767 | 2.79E-08   |
| AT2G36830 | 698.0286033 | 218.7905749 | 1.6737 | 2.13E-68   |
| AT2G42320 | 30.06750114 | 9.426565056 | 1.6734 | 0.0018259  |
| AT3G12610 | 39.6891015  | 12.44306587 | 1.6734 | 0.00022869 |
| AT5G24165 | 85.80802247 | 26.91284323 | 1.6728 | 9.53E-09   |
| AT2G46535 | 54.81536746 | 17.20348123 | 1.6719 | 8.70E-06   |
| AT5G39850 | 34.87830132 | 10.98194829 | 1.6672 | 0.00067291 |

|           |             |             |        |            |
|-----------|-------------|-------------|--------|------------|
| AT4G34620 | 107.6879118 | 33.9356342  | 1.666  | 8.59E-11   |
| AT2G23540 | 160.8380022 | 50.71492    | 1.6651 | 6.80E-16   |
| AT5G10430 | 163.3359177 | 51.75184216 | 1.6582 | 4.72E-16   |
| AT4G00430 | 92.05281117 | 29.17521885 | 1.6577 | 3.04E-09   |
| AT4G27595 | 26.82946255 | 8.531041375 | 1.653  | 0.0040044  |
| AT1G24280 | 46.76652869 | 14.89397279 | 1.6507 | 5.87E-05   |
| AT1G63000 | 211.8602388 | 67.54133862 | 1.6493 | 1.43E-20   |
| AT3G14680 | 79.47071839 | 25.35746    | 1.648  | 5.35E-08   |
| AT3G23800 | 43.85229397 | 13.99844911 | 1.6474 | 0.00011171 |
| AT2G14878 | 182.5791184 | 58.35043769 | 1.6457 | 9.86E-18   |
| AT5G63800 | 41.53940926 | 13.29145673 | 1.644  | 0.00018676 |
| AT5G63760 | 37.09867063 | 11.87747197 | 1.6431 | 0.0004811  |
| AT1G14210 | 65.31586401 | 20.92697442 | 1.6421 | 1.19E-06   |
| AT2G36570 | 42.92714008 | 13.76278498 | 1.6411 | 0.00014171 |
| AT3G19680 | 137.0152898 | 43.97492598 | 1.6396 | 2.42E-13   |
| AT3G63200 | 137.0615475 | 44.02205881 | 1.6385 | 2.45E-13   |

|           |             |             |        |            |
|-----------|-------------|-------------|--------|------------|
| AT5G58860 | 98.39011526 | 31.86178989 | 1.6267 | 1.26E-09   |
| AT1G77530 | 73.45721816 | 23.80207677 | 1.6258 | 2.55E-07   |
| AT1G78580 | 39.87413228 | 12.96152695 | 1.6212 | 0.00030747 |
| AT3G28200 | 47.09033255 | 15.36530104 | 1.6158 | 7.17E-05   |
| AT2G22230 | 27.15326641 | 8.860971152 | 1.6156 | 0.0044006  |
| AT1G15210 | 299.1485075 | 97.75347963 | 1.6136 | 3.91E-28   |
| AT1G77640 | 31.1314281  | 10.18069026 | 1.6125 | 0.0019679  |
| AT3G56240 | 213.340485  | 69.80371424 | 1.6118 | 3.89E-20   |
| AT1G16720 | 38.99523609 | 12.77299565 | 1.6102 | 0.00039546 |
| AT2G48030 | 43.99106705 | 14.42264454 | 1.6089 | 0.00014239 |
| AT4G37410 | 34.92455901 | 11.45327654 | 1.6085 | 0.00092706 |
| AT1G31770 | 64.48322551 | 21.16263855 | 1.6074 | 2.07E-06   |
| AT1G65690 | 31.59400504 | 10.36922156 | 1.6073 | 0.001837   |
| AT1G70690 | 31.50148965 | 10.36922156 | 1.6031 | 0.0019125  |
| AT1G47530 | 229.0218433 | 75.41252044 | 1.6026 | 1.97E-21   |
| AT4G21960 | 1726.105854 | 568.7518026 | 1.6016 | 7.66E-160  |



|           |             |             |        |            |
|-----------|-------------|-------------|--------|------------|
| AT4G12390 | 55.92555211 | 18.42893468 | 1.6015 | 1.30E-05   |
| AT5G36160 | 43.75977858 | 14.42264454 | 1.6013 | 0.0001578  |
| AT1G07870 | 52.68751353 | 17.39201253 | 1.599  | 2.57E-05   |
| AT4G34138 | 180.2662337 | 59.57589115 | 1.5973 | 7.03E-17   |
| AT5G44130 | 46.85904408 | 15.50669952 | 1.5954 | 8.78E-05   |
| AT3G15950 | 1562.261101 | 518.5082109 | 1.5912 | 1.61E-143  |
| AT1G05710 | 33.02799356 | 10.98194829 | 1.5886 | 0.001517   |
| AT5G02480 | 165.7413178 | 55.14540558 | 1.5876 | 1.95E-15   |
| AT5G65970 | 68.5076449  | 22.81228743 | 1.5865 | 1.13E-06   |
| AT5G23920 | 28.7722857  | 9.615096357 | 1.5813 | 0.0036862  |
| AT5G12420 | 101.9982154 | 34.1241655  | 1.5797 | 1.29E-09   |
| AT5G44350 | 37.46873219 | 12.53733152 | 1.5795 | 0.00065409 |
| AT3G16410 | 42.92714008 | 14.37551171 | 1.5783 | 0.00021936 |
| AT3G12520 | 30.06750114 | 10.08642461 | 1.5758 | 0.0029205  |
| AT4G00040 | 52.64125584 | 17.67480948 | 1.5745 | 3.20E-05   |
| AT3G54580 | 422.0089429 | 141.7755384 | 1.5737 | 2.46E-38   |

|           |             |             |        |            |
|-----------|-------------|-------------|--------|------------|
| AT1G04250 | 111.5273004 | 37.51772892 | 1.5718 | 2.12E-10   |
| AT2G14890 | 287.5840839 | 96.7636903  | 1.5714 | 3.61E-26   |
| AT1G76790 | 120.4550353 | 40.53422974 | 1.5713 | 3.42E-11   |
| AT1G75780 | 60.78260999 | 20.45564617 | 1.5712 | 6.40E-06   |
| AT5G53460 | 1418.214642 | 477.6911842 | 1.5699 | 4.07E-128  |
| AT1G36060 | 34.41572438 | 11.59467502 | 1.5696 | 0.001275   |
| AT3G23640 | 110.7871773 | 37.37633045 | 1.5676 | 2.66E-10   |
| AT1G53300 | 74.61366051 | 25.21606152 | 1.5651 | 4.19E-07   |
| AT2G36890 | 28.91105879 | 9.803627658 | 1.5602 | 0.0039654  |
| AT4G36190 | 28.7722857  | 9.756494833 | 1.5602 | 0.0040725  |
| AT1G32640 | 514.0154964 | 174.532852  | 1.5583 | 4.64E-46   |
| AT2G04780 | 96.72483827 | 32.85157922 | 1.5579 | 5.35E-09   |
| AT1G12040 | 38.39388607 | 13.0557926  | 1.5562 | 0.00062836 |
| AT3G55420 | 36.40480522 | 12.39593305 | 1.5543 | 0.00094136 |
| AT2G40460 | 33.07425125 | 11.26474524 | 1.5539 | 0.0018077  |
| AT4G20270 | 85.90053786 | 29.2694845  | 1.5533 | 5.11E-08   |

|           |             |             |        |            |
|-----------|-------------|-------------|--------|------------|
| AT1G58235 | 29.00357417 | 9.897893308 | 1.551  | 0.0040651  |
| AT1G05570 | 316.1250812 | 107.9341699 | 1.5503 | 2.97E-28   |
| AT2G42840 | 41.40063618 | 14.23411323 | 1.5403 | 0.00038606 |
| AT4G34260 | 46.62775561 | 16.07229342 | 1.5366 | 0.00014275 |
| AT1G30400 | 367.9799562 | 127.2586283 | 1.5319 | 2.46E-32   |
| AT4G13290 | 38.53265915 | 13.33858955 | 1.5305 | 0.00071714 |
| AT2G40150 | 32.93547817 | 11.40614372 | 1.5298 | 0.0021038  |
| AT1G80830 | 173.3275796 | 60.0472194  | 1.5293 | 2.16E-15   |
| AT3G21190 | 58.14592143 | 20.17284922 | 1.5273 | 1.66E-05   |
| AT3G16400 | 1096.122318 | 380.9746267 | 1.5246 | 2.14E-95   |
| AT2G01890 | 69.89537572 | 24.32053784 | 1.523  | 1.76E-06   |
| AT1G80280 | 31.36271657 | 10.93481546 | 1.5201 | 0.0029825  |
| AT1G61667 | 28.91105879 | 10.08642461 | 1.5192 | 0.0048169  |
| AT5G05960 | 70.91304499 | 24.74473327 | 1.5189 | 1.51E-06   |
| AT3G63120 | 60.64383691 | 21.16263855 | 1.5188 | 1.11E-05   |
| AT5G57350 | 51.57732887 | 18.00473926 | 1.5184 | 6.37E-05   |

|           |             |             |        |            |
|-----------|-------------|-------------|--------|------------|
| AT3G27060 | 35.06333209 | 12.25453457 | 1.5166 | 0.0015123  |
| AT3G54040 | 142.5199554 | 49.81939632 | 1.5164 | 1.35E-12   |
| AT3G14350 | 105.6988309 | 36.99926784 | 1.5144 | 1.88E-09   |
| AT2G41820 | 32.01032429 | 11.21761242 | 1.5128 | 0.0027454  |
| AT5G08240 | 142.3811823 | 49.96079479 | 1.5109 | 1.58E-12   |
| AT5G03555 | 35.71093981 | 12.53733152 | 1.5101 | 0.0013857  |
| AT3G06390 | 45.74885942 | 16.07229342 | 1.5092 | 0.00020794 |
| AT1G64370 | 135.9976205 | 47.83981766 | 1.5073 | 6.00E-12   |
| AT4G25630 | 160.3291676 | 56.41799186 | 1.5068 | 5.34E-14   |
| AT2G47460 | 80.67341843 | 28.42109364 | 1.5051 | 2.73E-07   |
| AT2G16720 | 39.59658611 | 13.95131628 | 1.505  | 0.00068784 |
| AT5G17820 | 147.5157863 | 52.17603758 | 1.4994 | 7.73E-13   |
| AT3G17609 | 37.00615525 | 13.10292543 | 1.4979 | 0.0011699  |
| AT2G36290 | 230.5020895 | 81.91685033 | 1.4925 | 9.95E-20   |
| AT1G33800 | 65.08457554 | 23.14221721 | 1.4918 | 6.27E-06   |
| AT3G46700 | 138.4030206 | 49.34806807 | 1.4878 | 5.89E-12   |

|           |             |             |        |            |
|-----------|-------------|-------------|--------|------------|
| AT1G25520 | 35.52590904 | 12.67873    | 1.4865 | 0.001641   |
| AT3G26770 | 36.31228983 | 13.00865978 | 1.481  | 0.0014686  |
| AT5G27420 | 66.70359483 | 23.99060807 | 1.4753 | 5.54E-06   |
| AT1G30410 | 36.03474367 | 12.96152695 | 1.4752 | 0.0015944  |
| AT3G45310 | 77.57415293 | 27.90263256 | 1.4752 | 7.22E-07   |
| AT1G75270 | 138.495536  | 49.96079479 | 1.471  | 8.53E-12   |
| AT1G06000 | 60.41254844 | 21.86963093 | 1.4659 | 1.94E-05   |
| AT1G54030 | 103.1084001 | 37.32919762 | 1.4658 | 7.13E-09   |
| AT4G26220 | 48.2467749  | 17.48627818 | 1.4642 | 0.00018384 |
| AT3G27390 | 72.48580659 | 26.30011651 | 1.4626 | 2.18E-06   |
| AT4G26130 | 52.45622506 | 19.08879424 | 1.4584 | 8.98E-05   |
| AT1G50750 | 50.46714422 | 18.38180186 | 1.4571 | 0.00013019 |
| AT1G29025 | 37.60750527 | 13.71565216 | 1.4552 | 0.0013531  |
| AT2G22330 | 181.6539646 | 66.26875234 | 1.4548 | 3.92E-15   |
| AT2G10410 | 242.9454092 | 88.79824282 | 1.452  | 4.67E-20   |
| AT2G30520 | 140.3458438 | 51.37477955 | 1.4499 | 9.83E-12   |

|           |             |             |        |            |
|-----------|-------------|-------------|--------|------------|
| AT4G02290 | 56.98947908 | 20.92697442 | 1.4453 | 4.44E-05   |
| AT1G28580 | 162.9195985 | 59.8586881  | 1.4445 | 1.75E-13   |
| AT1G67360 | 81.6910877  | 30.0236097  | 1.4441 | 5.09E-07   |
| AT5G10480 | 87.9358764  | 32.38025097 | 1.4413 | 1.71E-07   |
| AT4G12470 | 63.28052547 | 23.37788134 | 1.4366 | 1.56E-05   |
| AT1G20560 | 47.04407486 | 17.39201253 | 1.4356 | 0.00028487 |
| AT2G37170 | 655.5177825 | 242.4983861 | 1.4347 | 9.18E-53   |
| AT3G05490 | 131.4643665 | 48.68820851 | 1.433  | 7.32E-11   |
| AT5G55550 | 33.95314744 | 12.58446435 | 1.4319 | 0.0029526  |
| AT5G07030 | 142.3349246 | 52.78876431 | 1.431  | 1.06E-11   |
| AT1G78340 | 56.98947908 | 21.16263855 | 1.4292 | 5.15E-05   |
| AT4G17880 | 35.10958979 | 13.0557926  | 1.4272 | 0.0024744  |
| AT2G38760 | 33.81437436 | 12.58446435 | 1.426  | 0.0031177  |
| AT3G21510 | 156.6285521 | 58.35043769 | 1.4245 | 9.33E-13   |
| AT1G68560 | 114.3952774 | 42.65520688 | 1.4232 | 1.94E-09   |
| AT2G30200 | 64.06690627 | 23.94347524 | 1.4199 | 1.62E-05   |

|           |             |             |        |            |
|-----------|-------------|-------------|--------|------------|
| AT3G51350 | 32.61167431 | 12.20740175 | 1.4176 | 0.0040473  |
| AT2G36420 | 89.32360722 | 33.46430595 | 1.4164 | 1.91E-07   |
| AT3G01690 | 194.1897996 | 72.82021505 | 1.4151 | 1.38E-15   |
| AT2G30970 | 92.00655348 | 34.54836093 | 1.4131 | 1.25E-07   |
| AT5G61030 | 62.86420622 | 23.61354546 | 1.4126 | 2.14E-05   |
| AT1G64330 | 92.70041889 | 34.92542353 | 1.4083 | 1.20E-07   |
| AT1G20950 | 129.3365126 | 48.78247416 | 1.4067 | 1.90E-10   |
| AT5G62440 | 54.4915636  | 20.59704465 | 1.4036 | 0.0001004  |
| AT5G10470 | 52.03990581 | 19.74865379 | 1.3979 | 0.00016074 |
| AT1G75750 | 584.4197067 | 221.9013414 | 1.3971 | 1.82E-45   |
| AT1G41830 | 148.5797133 | 56.41799186 | 1.397  | 7.89E-12   |
| AT4G01480 | 163.1046292 | 61.97966524 | 1.3959 | 6.26E-13   |
| AT1G35320 | 50.37462883 | 19.18305989 | 1.3929 | 0.0002228  |
| AT4G21910 | 63.51181394 | 24.22627219 | 1.3905 | 2.40E-05   |
| AT1G27930 | 36.82112447 | 14.04558193 | 1.3904 | 0.0022784  |
| AT4G31920 | 39.41155534 | 15.03537126 | 1.3903 | 0.0014747  |

|           |             |             |        |            |
|-----------|-------------|-------------|--------|------------|
| AT3G53510 | 38.85646301 | 14.84683996 | 1.388  | 0.00164    |
| AT3G02230 | 335.3220242 | 128.3426832 | 1.3855 | 6.32E-26   |
| AT5G20960 | 422.1014583 | 161.7598564 | 1.3837 | 1.71E-32   |
| AT5G59450 | 50.6059173  | 19.41872401 | 1.3819 | 0.00023422 |
| AT4G31990 | 169.3956756 | 65.04329888 | 1.3809 | 3.15E-13   |
| AT2G47800 | 108.3355195 | 41.61828472 | 1.3802 | 1.24E-08   |
| AT4G14960 | 522.8969736 | 200.8801013 | 1.3802 | 4.62E-40   |
| AT1G23030 | 54.53782129 | 20.97410725 | 1.3786 | 0.00012407 |
| AT3G23090 | 89.69366878 | 34.5012281  | 1.3784 | 3.13E-07   |
| AT3G52430 | 98.62140373 | 37.94192435 | 1.3781 | 6.85E-08   |
| AT2G26650 | 189.5177725 | 72.96161353 | 1.3771 | 1.06E-14   |
| AT2G47860 | 37.60750527 | 14.51691019 | 1.3733 | 0.0022094  |
| AT4G13010 | 98.20508448 | 37.94192435 | 1.372  | 8.12E-08   |
| AT1G63940 | 207.0494386 | 80.1729358  | 1.3688 | 6.73E-16   |
| AT4G35040 | 67.44371793 | 26.15871803 | 1.3664 | 1.60E-05   |
| AT5G45480 | 39.59658611 | 15.36530104 | 1.3657 | 0.0016664  |



|           |             |             |        |            |
|-----------|-------------|-------------|--------|------------|
| AT1G31540 | 40.89180155 | 15.88376212 | 1.3643 | 0.001361   |
| AT4G35300 | 70.31169497 | 27.33703866 | 1.3629 | 1.03E-05   |
| AT5G37790 | 47.36787871 | 18.47606751 | 1.3583 | 0.00048675 |
| AT5G13650 | 164.5386178 | 64.24204085 | 1.3568 | 1.40E-12   |
| AT1G66180 | 281.6630991 | 110.0080142 | 1.3564 | 3.06E-21   |
| AT5G16000 | 37.79253604 | 14.79970714 | 1.3525 | 0.0024283  |
| AT5G24735 | 100.0553922 | 39.21451063 | 1.3513 | 8.30E-08   |
| AT2G37860 | 47.36787871 | 18.57033316 | 1.3509 | 0.00051567 |
| AT2G16400 | 41.35437849 | 16.2136919  | 1.3508 | 0.0013772  |
| AT1G53280 | 95.66091131 | 37.51772892 | 1.3504 | 1.75E-07   |
| AT5G41700 | 489.4526608 | 192.0191302 | 1.3499 | 1.92E-36   |
| AT5G57740 | 37.42247449 | 14.70544149 | 1.3476 | 0.0026621  |
| AT1G49580 | 58.28469451 | 22.90655309 | 1.3474 | 8.87E-05   |
| AT3G55360 | 75.95513364 | 29.92934405 | 1.3436 | 5.05E-06   |
| AT1G62990 | 38.48640145 | 15.17676974 | 1.3425 | 0.0023085  |
| AT3G26590 | 37.97756682 | 14.98823844 | 1.3413 | 0.0025244  |

|           |             |             |        |           |
|-----------|-------------|-------------|--------|-----------|
| AT5G41670 | 223.6096931 | 88.79824282 | 1.3324 | 1.49E-16  |
| AT1G67730 | 133.0833858 | 52.97729561 | 1.3289 | 5.40E-10  |
| AT1G51070 | 166.2964101 | 66.26875234 | 1.3274 | 2.35E-12  |
| AT1G22440 | 145.3879324 | 57.97337509 | 1.3264 | 7.53E-11  |
| AT5G17010 | 88.39845334 | 35.25535331 | 1.3262 | 8.22E-07  |
| AT4G15160 | 63.55807163 | 25.35746    | 1.3257 | 4.65E-05  |
| AT2G40080 | 206.2630578 | 82.34104576 | 1.3248 | 3.43E-15  |
| AT4G30440 | 329.6323278 | 131.6891138 | 1.3237 | 5.03E-24  |
| AT1G74450 | 121.8427661 | 48.68820851 | 1.3234 | 3.80E-09  |
| AT1G01630 | 63.18801008 | 25.26319435 | 1.3226 | 5.10E-05  |
| AT4G15920 | 62.63291775 | 25.07466305 | 1.3207 | 5.68E-05  |
| AT2G30860 | 1164.306159 | 466.7092359 | 1.3189 | 7.81E-84  |
| AT1G09560 | 397.5386227 | 159.3560823 | 1.3188 | 9.19E-29  |
| AT5G65310 | 167.5916256 | 67.21140885 | 1.3182 | 2.44E-12  |
| AT3G59670 | 40.98431693 | 16.44935602 | 1.317  | 0.0018238 |
| AT4G34135 | 92.33035734 | 37.23493197 | 1.3101 | 5.57E-07  |

|           |             |             |        |            |
|-----------|-------------|-------------|--------|------------|
| AT3G05165 | 173.0500335 | 69.80371424 | 1.3098 | 1.27E-12   |
| AT1G50560 | 51.16100963 | 20.64417747 | 1.3093 | 0.00038813 |
| AT2G43360 | 59.67242533 | 24.08487372 | 1.3089 | 0.00010182 |
| AT2G04160 | 37.28370141 | 15.08250409 | 1.3057 | 0.0034795  |
| AT1G52280 | 40.75302846 | 16.49648885 | 1.3047 | 0.0020428  |
| AT5G40910 | 61.75402157 | 25.02753022 | 1.303  | 7.81E-05   |
| AT3G56370 | 45.56382865 | 18.47606751 | 1.3022 | 0.0009863  |
| AT1G33560 | 45.65634403 | 18.52320033 | 1.3015 | 0.00097851 |
| AT1G74950 | 151.9102673 | 61.74400111 | 1.2988 | 5.16E-11   |
| AT2G34585 | 122.6291469 | 49.86652914 | 1.2982 | 5.46E-09   |
| AT1G20510 | 179.3873376 | 72.96161353 | 1.2979 | 6.49E-13   |
| AT1G04680 | 68.97022184 | 28.09116387 | 1.2959 | 2.70E-05   |
| AT1G05000 | 66.84236791 | 27.24277301 | 1.2949 | 3.80E-05   |
| AT2G24570 | 51.99364812 | 21.30403703 | 1.2872 | 0.00040833 |
| AT1G77885 | 57.82211757 | 23.70781111 | 1.2863 | 0.00016784 |
| AT5G10560 | 46.53524022 | 19.08879424 | 1.2856 | 0.00096039 |

|           |             |             |        |            |
|-----------|-------------|-------------|--------|------------|
| AT5G40250 | 41.58566696 | 17.06208275 | 1.2853 | 0.0020413  |
| AT2G18980 | 77.38912216 | 31.81465706 | 1.2824 | 8.61E-06   |
| AT2G01950 | 72.25451812 | 29.74081275 | 1.2806 | 1.93E-05   |
| AT2G43970 | 752.7514554 | 309.945459  | 1.2802 | 4.03E-52   |
| AT5G44480 | 50.92972116 | 20.97410725 | 1.2799 | 0.00051305 |
| AT1G74770 | 86.59440327 | 35.67954874 | 1.2792 | 2.15E-06   |
| AT4G05150 | 190.6742149 | 78.57041974 | 1.2791 | 1.94E-13   |
| AT4G39955 | 50.28211344 | 20.73844312 | 1.2777 | 0.00057646 |
| AT2G34710 | 67.7212641  | 28.04403104 | 1.2719 | 4.28E-05   |
| AT5G59780 | 86.68691866 | 35.91521286 | 1.2712 | 2.37E-06   |
| AT3G18130 | 95.38336514 | 39.59157323 | 1.2685 | 6.47E-07   |
| AT2G45510 | 65.26960631 | 27.10137453 | 1.268  | 6.45E-05   |
| AT3G16470 | 322.2310968 | 133.810091  | 1.2679 | 3.37E-22   |
| AT1G58080 | 74.10482588 | 30.82486773 | 1.2655 | 1.74E-05   |
| AT1G18200 | 37.70002066 | 15.69523082 | 1.2642 | 0.0041971  |
| AT3G58710 | 49.07941339 | 20.45564617 | 1.2626 | 0.00077723 |

|           |             |             |        |            |
|-----------|-------------|-------------|--------|------------|
| AT4G36900 | 42.64959392 | 17.81620796 | 1.2593 | 0.0020696  |
| AT1G28370 | 45.42505556 | 18.99452859 | 1.2579 | 0.0013857  |
| AT1G30120 | 129.7990895 | 54.29701472 | 1.2573 | 4.18E-09   |
| AT1G55210 | 83.68016855 | 35.01968918 | 1.2567 | 4.57E-06   |
| AT2G26900 | 51.43855579 | 21.53970115 | 1.2559 | 0.00057801 |
| AT2G21660 | 2014.106257 | 845.1386901 | 1.2529 | 2.18E-135  |
| AT3G15820 | 72.06948734 | 30.25927383 | 1.252  | 2.76E-05   |
| AT3G63210 | 71.42187962 | 30.0236097  | 1.2503 | 3.11E-05   |
| AT1G21310 | 6010.262189 | 2527.874818 | 1.2495 | 0          |
| AT5G56540 | 102.2757616 | 43.0794023  | 1.2474 | 3.21E-07   |
| AT5G57070 | 60.36629074 | 25.45172565 | 1.246  | 0.00016733 |
| AT2G46650 | 55.37045979 | 23.37788134 | 1.244  | 0.00035704 |
| AT4G11650 | 79.65574916 | 33.65283725 | 1.2431 | 1.00E-05   |
| AT3G52960 | 80.62716074 | 34.1241655  | 1.2405 | 8.98E-06   |
| AT5G15740 | 42.23327467 | 17.91047361 | 1.2376 | 0.0025458  |
| AT2G36910 | 137.1078052 | 58.16190639 | 1.2372 | 2.15E-09   |

|           |             |             |        |            |
|-----------|-------------|-------------|--------|------------|
| AT4G17770 | 39.08775148 | 16.5907545  | 1.2363 | 0.0040616  |
| AT2G04030 | 158.8951791 | 67.44707297 | 1.2362 | 8.53E-11   |
| AT3G28860 | 151.4014326 | 64.28917368 | 1.2357 | 2.67E-10   |
| AT2G47400 | 62.81794853 | 26.81857758 | 1.2279 | 0.00013941 |
| AT3G16240 | 106.0688925 | 45.29464509 | 1.2276 | 2.55E-07   |
| AT2G43290 | 93.90311893 | 40.11003431 | 1.2272 | 1.52E-06   |
| AT5G19740 | 66.42604866 | 28.37396082 | 1.2272 | 8.39E-05   |
| AT3G55010 | 44.03732474 | 18.85313011 | 1.2239 | 0.002152   |
| AT3G22240 | 72.53206428 | 31.06053186 | 1.2235 | 3.59E-05   |
| AT2G22770 | 84.46654935 | 36.24514264 | 1.2206 | 6.62E-06   |
| AT3G46290 | 49.95830958 | 21.49256833 | 1.2169 | 0.00097915 |
| AT4G29700 | 59.67242533 | 25.68738978 | 1.216  | 0.00024623 |
| AT3G12110 | 40.61425538 | 17.48627818 | 1.2158 | 0.0037006  |
| AT5G18860 | 89.13857645 | 38.46038543 | 1.2127 | 3.76E-06   |
| AT1G04040 | 112.0823927 | 48.40541156 | 1.2113 | 1.42E-07   |
| AT2G16890 | 51.16100963 | 22.10529506 | 1.2107 | 0.00086786 |

|           |             |             |        |            |
|-----------|-------------|-------------|--------|------------|
| AT1G11840 | 462.6231983 | 199.890312  | 1.2106 | 7.90E-30   |
| AT4G13340 | 648.1165514 | 280.1575135 | 1.21   | 1.21E-41   |
| AT2G41475 | 70.45046805 | 30.49493795 | 1.208  | 5.80E-05   |
| AT5G58350 | 47.32162102 | 20.502779   | 1.2067 | 0.0015316  |
| AT2G30020 | 317.1427504 | 137.580717  | 1.2049 | 2.00E-20   |
| AT4G23670 | 654.1300516 | 283.9281395 | 1.2041 | 9.52E-42   |
| AT5G65640 | 53.65892511 | 23.37788134 | 1.1987 | 0.00067511 |
| AT2G29750 | 46.39646714 | 20.26711487 | 1.1949 | 0.0019013  |
| AT2G39700 | 110.0470542 | 48.07548178 | 1.1947 | 2.55E-07   |
| AT5G44530 | 40.52173999 | 17.7219423  | 1.1932 | 0.0043452  |
| AT1G15500 | 417.6144619 | 182.7339636 | 1.1924 | 2.06E-26   |
| AT3G23490 | 77.43537985 | 33.88850137 | 1.1922 | 2.60E-05   |
| AT3G13690 | 51.66984426 | 22.62375613 | 1.1915 | 0.0009449  |
| AT2G43150 | 2533.071327 | 1111.674817 | 1.1882 | 1.72E-158  |
| AT3G27230 | 57.40579832 | 25.21606152 | 1.1869 | 0.00044349 |
| AT2G23030 | 43.38971702 | 19.08879424 | 1.1846 | 0.0030801  |

|           |             |             |        |            |
|-----------|-------------|-------------|--------|------------|
| AT4G24240 | 49.95830958 | 22.0110294  | 1.1825 | 0.0012819  |
| AT2G39130 | 47.83045565 | 21.11550572 | 1.1796 | 0.0017497  |
| AT5G37990 | 141.5022861 | 62.54525914 | 1.1779 | 4.32E-09   |
| AT1G56280 | 1149.226151 | 508.6103176 | 1.176  | 5.88E-71   |
| AT4G30020 | 44.59241707 | 19.74865379 | 1.175  | 0.0028     |
| AT4G17520 | 314.5060619 | 139.3246315 | 1.1746 | 1.37E-19   |
| AT3G08030 | 81.27476846 | 36.10374416 | 1.1707 | 2.00E-05   |
| AT1G53730 | 57.91463296 | 25.7345226  | 1.1702 | 0.00048186 |
| AT2G43710 | 101.3968654 | 45.05898097 | 1.1701 | 1.28E-06   |
| AT5G27950 | 58.09966373 | 25.82878825 | 1.1695 | 0.00047275 |
| AT1G76090 | 118.0496352 | 52.60023301 | 1.1663 | 1.41E-07   |
| AT5G64030 | 98.34385756 | 43.83352751 | 1.1658 | 2.10E-06   |
| AT1G47480 | 51.57732887 | 23.00081874 | 1.1651 | 0.0011836  |
| AT5G46470 | 61.80027926 | 27.57270279 | 1.1644 | 0.00030066 |
| AT5G03240 | 2374.083632 | 1059.640178 | 1.1638 | 1.88E-144  |
| AT3G55230 | 49.86579419 | 22.29382636 | 1.1614 | 0.0015278  |



|           |             |             |        |            |
|-----------|-------------|-------------|--------|------------|
| AT5G60920 | 292.7649457 | 131.0763871 | 1.1593 | 6.12E-18   |
| AT1G80270 | 43.34345933 | 19.41872401 | 1.1584 | 0.0037103  |
| AT5G52020 | 195.2537266 | 87.80845349 | 1.1529 | 5.15E-12   |
| AT3G27150 | 43.01965547 | 19.37159119 | 1.1511 | 0.0040784  |
| AT1G77510 | 58.74727145 | 26.53578063 | 1.1466 | 0.00053694 |
| AT5G49810 | 121.7965085 | 55.05113992 | 1.1456 | 1.26E-07   |
| AT3G02630 | 72.43954889 | 32.75731357 | 1.145  | 8.98E-05   |
| AT1G64650 | 82.5237262  | 37.37633045 | 1.1427 | 2.43E-05   |
| AT4G29270 | 60.55132152 | 27.43130431 | 1.1423 | 0.00043906 |
| AT4G29100 | 61.52273309 | 27.90263256 | 1.1407 | 0.00039217 |
| AT1G53240 | 212.3228157 | 96.38662769 | 1.1394 | 7.98E-13   |
| AT4G12600 | 94.41195357 | 42.890871   | 1.1383 | 5.42E-06   |
| AT5G42180 | 43.34345933 | 19.70152097 | 1.1375 | 0.0042806  |
| AT3G54400 | 62.81794853 | 28.56249212 | 1.1371 | 0.00034357 |
| AT1G79270 | 136.9227744 | 62.26246219 | 1.1369 | 2.02E-08   |
| AT4G02540 | 68.18384104 | 31.01339903 | 1.1365 | 0.0001714  |

|           |             |             |        |            |
|-----------|-------------|-------------|--------|------------|
| AT4G07825 | 56.20309828 | 25.59312413 | 1.1349 | 0.00083015 |
| AT3G04940 | 58.19217912 | 26.53578063 | 1.1329 | 0.00065216 |
| AT4G21600 | 69.2940257  | 31.62612576 | 1.1316 | 0.00015661 |
| AT5G26780 | 84.55906473 | 38.6017839  | 1.1313 | 2.16E-05   |
| AT1G35720 | 1107.13165  | 505.6409496 | 1.1306 | 8.28E-65   |
| AT2G04410 | 136.0901359 | 62.16819654 | 1.1303 | 2.61E-08   |
| AT1G43710 | 146.4981171 | 66.97574472 | 1.1292 | 6.73E-09   |
| AT3G15530 | 82.24618003 | 37.61199457 | 1.1288 | 3.02E-05   |
| AT4G18010 | 257.4240674 | 117.7849304 | 1.128  | 2.91E-15   |
| AT3G04810 | 57.96089065 | 26.53578063 | 1.1271 | 0.00070786 |
| AT1G80490 | 133.0371281 | 60.94274308 | 1.1263 | 4.22E-08   |
| AT3G44590 | 56.850706   | 26.06445238 | 1.1251 | 0.00083201 |
| AT5G19530 | 73.73476433 | 33.88850137 | 1.1215 | 9.90E-05   |
| AT3G27300 | 89.32360722 | 41.09982364 | 1.1199 | 1.37E-05   |
| AT1G79040 | 74.42862974 | 34.26556398 | 1.1191 | 9.34E-05   |
| AT4G35160 | 70.54298344 | 32.52164944 | 1.1171 | 0.00015631 |

|           |             |             |        |            |
|-----------|-------------|-------------|--------|------------|
| AT1G64950 | 68.73893337 | 31.72039141 | 1.1157 | 0.00019929 |
| AT2G41480 | 54.16775974 | 25.02753022 | 1.1139 | 0.0012847  |
| AT1G35516 | 66.56482175 | 30.77773491 | 1.1129 | 0.00027023 |
| AT3G25530 | 78.68433759 | 36.38654111 | 1.1127 | 5.87E-05   |
| AT1G67030 | 50.92972116 | 23.56641264 | 1.1118 | 0.0019634  |
| AT5G19240 | 111.3422696 | 51.56331085 | 1.1106 | 9.34E-07   |
| AT2G42490 | 262.7437022 | 121.7912205 | 1.1092 | 3.16E-15   |
| AT4G14010 | 124.1093932 | 57.54917966 | 1.1087 | 1.90E-07   |
| AT4G20260 | 549.2638592 | 254.7057878 | 1.1087 | 2.09E-31   |
| AT2G26730 | 64.43696782 | 29.88221123 | 1.1086 | 0.00037058 |
| AT1G68810 | 54.4453059  | 25.31032717 | 1.1051 | 0.0013381  |
| AT5G02050 | 64.34445243 | 29.92934405 | 1.1043 | 0.00039072 |
| AT3G45600 | 97.04864213 | 45.15324662 | 1.1039 | 6.44E-06   |
| AT2G39900 | 52.03990581 | 24.22627219 | 1.103  | 0.0018305  |
| AT1G62800 | 54.95414054 | 25.59312413 | 1.1025 | 0.0012829  |
| AT3G47620 | 56.66567522 | 26.39438216 | 1.1022 | 0.00104    |

|           |             |             |        |            |
|-----------|-------------|-------------|--------|------------|
| AT5G50400 | 45.84137481 | 21.39830268 | 1.0992 | 0.0040682  |
| AT4G18040 | 76.97280291 | 35.96234569 | 1.0979 | 8.71E-05   |
| AT2G38120 | 135.6738167 | 63.53504847 | 1.0945 | 5.89E-08   |
| AT1G45201 | 73.64224894 | 34.54836093 | 1.0919 | 0.00014015 |
| AT3G23810 | 368.2112447 | 172.8360703 | 1.0911 | 1.03E-20   |
| AT1G19600 | 92.83919197 | 43.59786338 | 1.0905 | 1.34E-05   |
| AT5G44020 | 143.7226554 | 67.4942058  | 1.0905 | 2.37E-08   |
| AT2G05940 | 158.2475714 | 74.37559829 | 1.0893 | 3.92E-09   |
| AT2G38800 | 511.656354  | 240.7073387 | 1.0879 | 1.53E-28   |
| AT5G04830 | 108.2430041 | 50.95058413 | 1.0871 | 2.08E-06   |
| AT3G23600 | 260.6158483 | 122.6867442 | 1.0869 | 1.06E-14   |
| AT1G64230 | 418.4008427 | 197.0623425 | 1.0862 | 2.37E-23   |
| AT1G56110 | 258.9043136 | 122.1211503 | 1.0841 | 1.48E-14   |
| AT2G35940 | 62.49414467 | 29.50514862 | 1.0828 | 0.0006087  |
| AT3G54010 | 105.6988309 | 49.91366197 | 1.0825 | 3.08E-06   |
| AT1G66760 | 97.92753832 | 46.28443442 | 1.0812 | 8.21E-06   |

|           |             |             |        |            |
|-----------|-------------|-------------|--------|------------|
| AT5G64330 | 49.44947495 | 23.37788134 | 1.0808 | 0.0029807  |
| AT3G56200 | 46.53524022 | 22.0110294  | 1.0801 | 0.0042758  |
| AT2G05990 | 146.9144363 | 69.61518294 | 1.0775 | 2.14E-08   |
| AT4G17340 | 161.8094138 | 76.68510673 | 1.0773 | 3.40E-09   |
| AT5G01890 | 63.41929855 | 30.07074253 | 1.0766 | 0.00057765 |
| AT3G13470 | 75.44629901 | 35.77381439 | 1.0765 | 0.00013452 |
| AT3G18780 | 1299.656172 | 618.1941363 | 1.072  | 1.00E-70   |
| AT5G06750 | 76.74151444 | 36.52793959 | 1.071  | 0.00012285 |
| AT3G09980 | 91.45146115 | 43.69212903 | 1.0656 | 2.24E-05   |
| AT4G39260 | 789.8038683 | 377.4396648 | 1.0652 | 1.18E-42   |
| AT3G62130 | 52.78002892 | 25.26319435 | 1.063  | 0.0023075  |
| AT5G14390 | 65.45463709 | 31.34332881 | 1.0623 | 0.00052114 |
| AT1G48920 | 603.5241344 | 289.0184846 | 1.0622 | 1.59E-32   |
| AT5G15350 | 178.2308952 | 85.35754658 | 1.0622 | 6.86E-10   |
| AT2G06850 | 60.36629074 | 28.98668755 | 1.0584 | 0.00098585 |
| AT5G20885 | 57.40579832 | 27.57270279 | 1.058  | 0.0013973  |

|           |             |             |        |            |
|-----------|-------------|-------------|--------|------------|
| AT3G24080 | 174.2989912 | 83.84929617 | 1.0557 | 1.31E-09   |
| AT5G37310 | 48.75560954 | 23.47214699 | 1.0546 | 0.0039594  |
| AT1G04820 | 366.4071946 | 176.6066963 | 1.0529 | 1.19E-19   |
| AT3G22850 | 146.6368902 | 70.84063639 | 1.0496 | 4.18E-08   |
| AT1G58270 | 318.0216466 | 153.7001432 | 1.049  | 5.15E-17   |
| AT4G26690 | 204.875327  | 99.12033156 | 1.0475 | 4.32E-11   |
| AT3G54200 | 60.96764077 | 29.50514862 | 1.0471 | 0.001019   |
| AT2G25520 | 210.9813426 | 102.1368324 | 1.0466 | 2.13E-11   |
| AT1G06640 | 343.5096361 | 166.3317404 | 1.0463 | 2.75E-18   |
| AT2G38080 | 49.72702111 | 24.08487372 | 1.0459 | 0.0037608  |
| AT2G47180 | 52.1786789  | 25.31032717 | 1.0437 | 0.0028847  |
| AT5G58750 | 68.4613872  | 33.22864182 | 1.0429 | 0.00044572 |
| AT4G37870 | 460.0327674 | 223.4095918 | 1.042  | 3.10E-24   |
| AT2G28570 | 82.5237262  | 40.11003431 | 1.0408 | 9.00E-05   |
| AT1G28290 | 581.3204412 | 282.6084204 | 1.0405 | 1.76E-30   |
| AT5G67470 | 58.14592143 | 28.32682799 | 1.0375 | 0.0015333  |

|           |             |             |        |           |
|-----------|-------------|-------------|--------|-----------|
| AT1G20620 | 502.2660421 | 244.7607617 | 1.0371 | 2.97E-26  |
| AT5G56000 | 61.4764754  | 29.97647688 | 1.0362 | 0.0010632 |
| AT4G26010 | 52.59499814 | 25.68738978 | 1.0339 | 0.0029715 |
| AT2G18280 | 174.5765374 | 85.45181223 | 1.0307 | 2.50E-09  |
| AT3G61200 | 59.62616764 | 29.2694845  | 1.0265 | 0.0014327 |
| AT1G12140 | 49.63450572 | 24.36767067 | 1.0264 | 0.0044144 |
| AT5G07580 | 61.24518693 | 30.07074253 | 1.0262 | 0.0011994 |
| AT3G23560 | 50.18959805 | 24.65046762 | 1.0258 | 0.0041635 |
| AT5G09870 | 169.5344487 | 83.28370227 | 1.0255 | 5.12E-09  |
| AT3G01520 | 149.7361557 | 73.57434026 | 1.0251 | 5.10E-08  |
| AT2G28890 | 59.07107531 | 29.03382037 | 1.0247 | 0.0015448 |
| AT4G27652 | 206.540604  | 101.5712385 | 1.0239 | 7.54E-11  |
| AT3G29360 | 181.0526145 | 89.08103978 | 1.0232 | 1.46E-09  |
| AT4G16340 | 113.100062  | 55.71099948 | 1.0216 | 3.59E-06  |
| AT3G24503 | 355.7216673 | 175.4755085 | 1.0195 | 2.84E-18  |
| AT4G38920 | 291.0071533 | 143.5665858 | 1.0193 | 5.07E-15  |

|           |             |             |        |            |
|-----------|-------------|-------------|--------|------------|
| AT5G48560 | 79.19317222 | 39.07311216 | 1.0192 | 0.00017119 |
| AT5G46290 | 150.2449903 | 74.18706699 | 1.0181 | 5.65E-08   |
| AT4G10480 | 189.8415764 | 93.84145513 | 1.0165 | 6.48E-10   |
| AT2G41530 | 104.9587078 | 51.89324063 | 1.0162 | 9.91E-06   |
| AT5G07340 | 59.9499715  | 29.6465471  | 1.0159 | 0.0015218  |
| AT2G41220 | 339.9477936 | 168.1699206 | 1.0154 | 2.20E-17   |
| AT3G21710 | 57.40579832 | 28.42109364 | 1.0142 | 0.0020413  |
| AT5G45340 | 89.83244186 | 44.49338706 | 1.0136 | 5.62E-05   |
| AT1G18660 | 60.7363523  | 30.11787535 | 1.0119 | 0.0014464  |
| AT2G12400 | 130.8630165 | 64.94903323 | 1.0107 | 5.89E-07   |
| AT5G60690 | 58.28469451 | 28.98668755 | 1.0077 | 0.0019643  |
| AT1G75680 | 124.5257124 | 62.02679807 | 1.0055 | 1.32E-06   |
| AT4G24830 | 79.56323378 | 39.63870606 | 1.0052 | 0.00019436 |
| AT3G53420 | 738.0415087 | 367.7303028 | 1.0051 | 7.80E-37   |
| AT4G18030 | 208.2058809 | 103.7864813 | 1.0044 | 1.17E-10   |
| AT3G25860 | 129.7528318 | 64.71336911 | 1.0036 | 7.63E-07   |



|           |             |             |         |            |
|-----------|-------------|-------------|---------|------------|
| AT5G52540 | 56.20309828 | 28.04403104 | 1.003   | 0.0025672  |
| AT5G66730 | 53.75144049 | 107.5099745 | -1.0001 | 0.0023915  |
| AT3G49790 | 49.68076342 | 99.49739416 | -1.002  | 0.0037103  |
| AT1G56145 | 76.32519519 | 152.9931509 | -1.0032 | 0.00016291 |
| ATCG01130 | 123.6930739 | 248.2485907 | -1.005  | 5.68E-07   |
| AT1G04400 | 107.502881  | 216.0568711 | -1.007  | 3.65E-06   |
| AT1G07820 | 70.49672574 | 141.6812728 | -1.007  | 0.00029635 |
| AT4G01000 | 134.7949205 | 270.9194797 | -1.0071 | 1.39E-07   |
| AT3G19910 | 67.11991408 | 134.9884116 | -1.008  | 0.00043219 |
| AT2G30040 | 50.00456727 | 100.628582  | -1.0089 | 0.0031957  |
| AT4G21570 | 107.6879118 | 216.8581291 | -1.0099 | 3.24E-06   |
| AT4G03390 | 48.75560954 | 98.46047201 | -1.014  | 0.0034218  |
| AT3G07780 | 167.0827909 | 337.7538259 | -1.0154 | 1.81E-09   |
| AT1G53430 | 56.29561367 | 113.9671715 | -1.0175 | 0.0013102  |
| AT1G33980 | 57.91463296 | 117.8320632 | -1.0247 | 0.00094217 |
| AT3G07090 | 61.52273309 | 125.1847839 | -1.0249 | 0.00060206 |

|           |             |             |         |            |
|-----------|-------------|-------------|---------|------------|
| AT5G57560 | 403.8759268 | 822.0436057 | -1.0253 | 7.16E-23   |
| AT5G49520 | 69.47905647 | 141.7755384 | -1.029  | 0.0002037  |
| AT2G14170 | 203.0250192 | 414.5803311 | -1.03   | 7.88E-12   |
| AT5G18130 | 61.15267154 | 124.9491198 | -1.0309 | 0.00055907 |
| AT3G10985 | 184.013107  | 376.4498755 | -1.0326 | 7.69E-11   |
| AT2G26530 | 144.9253555 | 296.7954008 | -1.0342 | 1.12E-08   |
| AT4G21580 | 67.02739869 | 137.4864513 | -1.0365 | 0.00023408 |
| AT1G67310 | 69.47905647 | 142.8124606 | -1.0395 | 0.00015946 |
| AT4G39640 | 47.73794027 | 98.46047201 | -1.0444 | 0.0024038  |
| AT5G44070 | 67.6750064  | 139.6074285 | -1.0447 | 0.00017877 |
| AT3G59350 | 134.1935705 | 277.0938798 | -1.0461 | 2.61E-08   |
| AT5G42570 | 85.34544553 | 176.3238994 | -1.0468 | 1.66E-05   |
| AT2G48020 | 45.1475094  | 93.32299405 | -1.0476 | 0.0031957  |
| AT5G44290 | 100.7492577 | 208.4684862 | -1.0491 | 1.99E-06   |
| AT5G28770 | 57.26702524 | 118.6333212 | -1.0507 | 0.00061985 |
| AT5G21940 | 303.8205346 | 629.5060144 | -1.051  | 1.81E-18   |

|           |             |             |         |            |
|-----------|-------------|-------------|---------|------------|
| AT5G53310 | 48.43180568 | 100.3929178 | -1.0516 | 0.0019554  |
| AT2G38470 | 285.4099723 | 591.846887  | -1.0522 | 2.02E-17   |
| AT1G62380 | 156.0734597 | 323.8025097 | -1.0529 | 9.66E-10   |
| AT3G27260 | 80.1645838  | 166.6616702 | -1.0559 | 2.56E-05   |
| AT4G27320 | 81.32102615 | 169.2068427 | -1.0571 | 2.11E-05   |
| AT3G63310 | 58.88604453 | 122.9695412 | -1.0623 | 0.00039358 |
| AT1G22280 | 77.52789524 | 162.136919  | -1.0644 | 2.89E-05   |
| AT1G07360 | 53.47389433 | 112.0347257 | -1.067  | 0.00075613 |
| AT1G17290 | 124.7570009 | 261.6343131 | -1.0684 | 3.44E-08   |
| AT2G30490 | 690.9511761 | 1449.899971 | -1.0693 | 1.40E-43   |
| AT1G14900 | 51.20726732 | 107.4628416 | -1.0694 | 0.00098901 |
| AT2G18690 | 210.8425695 | 442.5772294 | -1.0698 | 1.52E-13   |
| AT4G25810 | 126.6073086 | 265.9234002 | -1.0707 | 2.39E-08   |
| AT5G65630 | 193.9585112 | 408.2173997 | -1.0736 | 1.28E-12   |
| AT1G27970 | 59.44113686 | 125.1376511 | -1.074  | 0.00028589 |
| AT1G32700 | 43.99106705 | 92.71026732 | -1.0755 | 0.002432   |

|           |             |             |         |            |
|-----------|-------------|-------------|---------|------------|
| AT1G67580 | 64.29819474 | 135.5540055 | -1.076  | 0.00013746 |
| AT1G19770 | 254.5560904 | 536.9842784 | -1.0769 | 1.44E-16   |
| AT5G08500 | 46.53524022 | 98.17767505 | -1.0771 | 0.0016617  |
| AT5G08630 | 38.76394762 | 81.86971751 | -1.0786 | 0.0048809  |
| AT1G11400 | 43.6210055  | 92.19180624 | -1.0796 | 0.0024049  |
| AT3G63070 | 65.26960631 | 137.9577796 | -1.0797 | 0.00011014 |
| AT5G27380 | 83.86519932 | 177.50222   | -1.0817 | 7.18E-06   |
| AT5G03730 | 92.70041889 | 196.6381471 | -1.0849 | 1.79E-06   |
| AT5G25280 | 84.18900318 | 178.586275  | -1.0849 | 6.23E-06   |
| AT5G16830 | 75.72384517 | 160.9585983 | -1.0879 | 1.96E-05   |
| AT5G01100 | 94.1344074  | 200.2202418 | -1.0888 | 1.26E-06   |
| AT1G25220 | 46.81278638 | 99.78019111 | -1.0919 | 0.0012502  |
| AT3G45980 | 124.2481662 | 265.1221422 | -1.0934 | 1.18E-08   |
| AT2G15970 | 222.7770546 | 476.937059  | -1.0982 | 2.51E-15   |
| AT2G31810 | 142.3349246 | 304.9022467 | -1.0991 | 5.71E-10   |
| AT4G24060 | 62.81794853 | 134.6584818 | -1.1001 | 9.82E-05   |

|           |             |             |         |            |
|-----------|-------------|-------------|---------|------------|
| AT5G65300 | 68.69267567 | 147.4786103 | -1.1023 | 3.81E-05   |
| AT1G64280 | 53.47389433 | 114.8626952 | -1.103  | 0.00037737 |
| AT5G39670 | 39.45781303 | 84.8390855  | -1.1044 | 0.0030394  |
| AT5G46730 | 38.39388607 | 82.62384271 | -1.1057 | 0.0034976  |
| AT4G36730 | 73.9197951  | 159.3089494 | -1.1078 | 1.49E-05   |
| AT5G47220 | 43.66726319 | 94.12425208 | -1.108  | 0.0015247  |
| AT4G19200 | 183.8280762 | 396.7641232 | -1.1099 | 4.50E-13   |
| AT5G18650 | 74.52114512 | 161.052864  | -1.1118 | 1.21E-05   |
| AT1G51760 | 70.58924113 | 152.6632211 | -1.1128 | 2.16E-05   |
| AT5G14120 | 123.8781047 | 268.138643  | -1.1141 | 4.67E-09   |
| AT3G52240 | 40.79928616 | 88.42118022 | -1.1158 | 0.0020877  |
| AT5G55100 | 47.36787871 | 102.7024263 | -1.1165 | 0.00074656 |
| AT1G08930 | 341.705586  | 741.7764042 | -1.1182 | 1.85E-24   |
| AT2G18440 | 152.8816789 | 332.0036213 | -1.1188 | 3.55E-11   |
| AT5G43830 | 170.9684372 | 371.6423273 | -1.1202 | 1.73E-12   |
| AT4G37120 | 90.66508035 | 197.3451394 | -1.1221 | 6.69E-07   |

|           |             |             |         |            |
|-----------|-------------|-------------|---------|------------|
| AT3G53110 | 101.7206692 | 221.5242788 | -1.1229 | 1.11E-07   |
| AT2G18750 | 126.699824  | 276.1040905 | -1.1238 | 1.85E-09   |
| AT4G14500 | 61.01389846 | 133.6215597 | -1.1309 | 6.30E-05   |
| AT1G25682 | 44.59241707 | 97.7063468  | -1.1317 | 0.00088808 |
| AT2G05520 | 34.69327054 | 76.02524717 | -1.1318 | 0.0043692  |
| AT2G46740 | 43.89855166 | 96.19809639 | -1.1318 | 0.00098901 |
| AT3G10720 | 43.80603627 | 96.00956509 | -1.132  | 0.00099952 |
| AT4G12040 | 130.2154088 | 285.3892571 | -1.132  | 6.91E-10   |
| AT3G19190 | 68.41512951 | 149.97665   | -1.1324 | 1.81E-05   |
| AT1G51680 | 145.6192209 | 319.4191569 | -1.1333 | 4.99E-11   |
| AT3G45970 | 122.7216623 | 269.3169636 | -1.1339 | 2.17E-09   |
| AT1G55810 | 87.05698021 | 191.265005  | -1.1355 | 7.54E-07   |
| AT3G05545 | 65.96347172 | 144.9334377 | -1.1357 | 2.48E-05   |
| AT5G20000 | 44.96247862 | 98.83753461 | -1.1363 | 0.00077027 |
| AT5G01830 | 57.22076755 | 125.8446435 | -1.137  | 0.00010152 |
| AT3G62240 | 41.12309002 | 90.49502453 | -1.1379 | 0.0014029  |

|           |             |             |         |            |
|-----------|-------------|-------------|---------|------------|
| AT4G21660 | 173.8364143 | 382.8599397 | -1.1391 | 2.94E-13   |
| AT1G11960 | 73.31844508 | 161.5241922 | -1.1395 | 6.59E-06   |
| AT4G20380 | 40.89180155 | 90.16509476 | -1.1408 | 0.0013931  |
| AT2G04400 | 49.68076342 | 109.5838188 | -1.1413 | 0.00032194 |
| AT3G03790 | 39.13400917 | 86.34733591 | -1.1417 | 0.0018324  |
| AT5G26760 | 34.64701285 | 76.6379739  | -1.1453 | 0.0036549  |
| AT2G19270 | 36.26603214 | 80.31433427 | -1.147  | 0.0027262  |
| AT4G17140 | 129.7990895 | 287.6516327 | -1.148  | 3.21E-10   |
| AT5G57580 | 71.79194118 | 159.4032151 | -1.1508 | 6.17E-06   |
| AT4G19860 | 109.5844772 | 243.3467769 | -1.151  | 9.05E-09   |
| AT5G62640 | 41.40063618 | 92.00327494 | -1.152  | 0.001065   |
| AT2G03470 | 39.41155534 | 87.66705502 | -1.1534 | 0.0014615  |
| AT5G35690 | 42.74210931 | 95.11404141 | -1.154  | 0.00082298 |
| AT3G08730 | 82.80127236 | 184.2893468 | -1.1542 | 8.18E-07   |
| AT4G27960 | 122.5366316 | 272.8519255 | -1.1549 | 7.95E-10   |
| AT4G02020 | 59.30236378 | 132.1133093 | -1.1556 | 4.65E-05   |

|           |             |             |         |            |
|-----------|-------------|-------------|---------|------------|
| AT3G17860 | 37.00615525 | 82.52957706 | -1.1571 | 0.0020728  |
| AT5G11260 | 86.91820713 | 193.9044432 | -1.1576 | 3.58E-07   |
| AT2G30600 | 88.76851489 | 198.1935303 | -1.1588 | 2.49E-07   |
| AT2G27830 | 58.70101376 | 131.1706527 | -1.16   | 4.65E-05   |
| AT3G45960 | 69.15525261 | 154.5485341 | -1.1601 | 7.44E-06   |
| AT5G58020 | 49.7732788  | 111.3277333 | -1.1614 | 0.00021247 |
| AT1G47380 | 42.55707853 | 95.25543989 | -1.1624 | 0.00073346 |
| AT5G46410 | 59.71868303 | 134.1871536 | -1.168  | 3.18E-05   |
| AT5G53550 | 47.59916718 | 106.9915134 | -1.1685 | 0.00026976 |
| AT3G10550 | 32.14909737 | 72.3488868  | -1.1702 | 0.0040321  |
| AT2G04865 | 31.22394349 | 70.27504249 | -1.1704 | 0.0047486  |
| AT2G16365 | 45.33254018 | 102.231098  | -1.1732 | 0.00037023 |
| AT1G61690 | 58.00714835 | 130.840723  | -1.1735 | 3.78E-05   |
| AT5G47120 | 127.763751  | 288.3114922 | -1.1741 | 1.13E-10   |
| AT5G50430 | 30.71510885 | 69.33238598 | -1.1746 | 0.0049159  |
| AT5G50200 | 55.37045979 | 125.0433855 | -1.1752 | 5.86E-05   |



|           |             |             |         |            |
|-----------|-------------|-------------|---------|------------|
| AT1G16670 | 35.66468212 | 80.5499984  | -1.1754 | 0.0020036  |
| AT5G12480 | 77.43537985 | 175.0513131 | -1.1767 | 1.01E-06   |
| AT3G54140 | 35.43339365 | 80.1729358  | -1.178  | 0.0020073  |
| AT1G08940 | 38.67143223 | 87.52565654 | -1.1784 | 0.0011172  |
| AT3G24500 | 42.32579006 | 95.82103379 | -1.1788 | 0.00057556 |
| AT1G78420 | 53.47389433 | 121.0842281 | -1.1791 | 7.57E-05   |
| AT3G07280 | 34.69327054 | 78.66468539 | -1.1811 | 0.0021926  |
| AT2G32240 | 189.7953187 | 430.4640933 | -1.1814 | 6.69E-16   |
| AT3G45830 | 46.53524022 | 105.5775286 | -1.1819 | 0.00025138 |
| AT2G38230 | 37.56124757 | 85.31041375 | -1.1835 | 0.0012609  |
| AT3G57550 | 78.73059528 | 179.7174628 | -1.1907 | 5.00E-07   |
| AT2G20560 | 34.2306936  | 78.14622431 | -1.1909 | 0.0020722  |
| AT5G45190 | 60.36629074 | 137.9577796 | -1.1924 | 1.54E-05   |
| AT5G63160 | 187.2974032 | 428.90871   | -1.1953 | 3.44E-16   |
| AT2G40000 | 866.2215789 | 1988.015437 | -1.1985 | 2.26E-74   |
| AT4G18710 | 149.0422902 | 342.1843115 | -1.1991 | 4.51E-13   |

|           |             |             |         |            |
|-----------|-------------|-------------|---------|------------|
| AT4G01120 | 86.08556864 | 198.2877959 | -1.2038 | 7.69E-08   |
| AT4G31860 | 61.4764754  | 141.7284056 | -1.205  | 8.90E-06   |
| AT1G28200 | 65.03831784 | 150.0709157 | -1.2063 | 4.27E-06   |
| AT4G39980 | 175.9642682 | 406.1435554 | -1.2067 | 1.27E-15   |
| AT3G02340 | 28.7722857  | 66.55154929 | -1.2098 | 0.0045254  |
| AT1G12610 | 48.38554798 | 111.94046   | -1.2101 | 0.0001002  |
| AT5G13750 | 72.76335275 | 168.3584519 | -1.2103 | 8.24E-07   |
| AT1G03290 | 42.64959392 | 98.79040178 | -1.2118 | 0.00029601 |
| AT1G55500 | 35.34087826 | 81.96398316 | -1.2137 | 0.0011994  |
| AT1G70590 | 48.98689801 | 113.6372417 | -1.214  | 8.24E-05   |
| AT5G51980 | 38.76394762 | 90.07082911 | -1.2163 | 0.00058751 |
| AT4G36780 | 90.89636882 | 211.4378542 | -1.2179 | 1.70E-08   |
| AT2G35710 | 49.31070186 | 114.8626952 | -1.2199 | 6.76E-05   |
| AT1G75380 | 59.30236378 | 138.3348422 | -1.222  | 8.69E-06   |
| AT3G53260 | 353.4550403 | 824.7301767 | -1.2224 | 4.09E-32   |
| AT1G62180 | 86.08556864 | 200.8801013 | -1.2225 | 3.76E-08   |

|           |             |             |         |            |
|-----------|-------------|-------------|---------|------------|
| AT5G50210 | 36.49732061 | 85.16901528 | -1.2225 | 0.00083015 |
| AT1G21110 | 59.85745611 | 139.7959598 | -1.2237 | 7.39E-06   |
| AT3G18290 | 78.31427604 | 182.9224949 | -1.2239 | 1.73E-07   |
| AT5G50960 | 46.95155947 | 109.7252172 | -1.2247 | 9.81E-05   |
| AT1G04985 | 34.92455901 | 81.68118621 | -1.2258 | 0.0010771  |
| AT4G02380 | 361.365106  | 847.2596672 | -1.2293 | 2.52E-33   |
| AT2G42680 | 107.1790771 | 251.689287  | -1.2316 | 3.26E-10   |
| AT4G15760 | 99.13023836 | 232.8832897 | -1.2322 | 1.68E-09   |
| AT5G11740 | 240.0774322 | 564.0856529 | -1.2324 | 2.08E-22   |
| AT2G06025 | 43.25094394 | 101.7597698 | -1.2344 | 0.0001704  |
| AT1G53580 | 99.82410377 | 234.9100012 | -1.2346 | 1.31E-09   |
| AT1G14860 | 42.41830545 | 99.92158959 | -1.2361 | 0.00019536 |
| AT3G06760 | 43.6210055  | 102.8909576 | -1.238  | 0.00014657 |
| AT1G53840 | 244.4719131 | 577.0000471 | -1.2389 | 3.92E-23   |
| AT1G79245 | 878.5723832 | 2073.891445 | -1.2391 | 1.42E-82   |
| AT1G22410 | 298.5471574 | 704.7771364 | -1.2392 | 3.39E-28   |

|           |             |             |         |            |
|-----------|-------------|-------------|---------|------------|
| AT1G08720 | 36.21977445 | 85.64034353 | -1.2415 | 0.00064336 |
| AT3G51130 | 38.62517454 | 91.62621234 | -1.2462 | 0.00035859 |
| AT3G03310 | 34.2306936  | 81.35125643 | -1.2489 | 0.00086766 |
| AT2G27550 | 42.18701698 | 100.2986522 | -1.2494 | 0.00015852 |
| AT1G05960 | 78.22176065 | 186.127527  | -1.2506 | 6.72E-08   |
| AT2G07783 | 28.54099723 | 67.91840123 | -1.2508 | 0.0027963  |
| AT2G38410 | 41.07683232 | 97.84774528 | -1.2522 | 0.0001904  |
| AT3G08690 | 33.53682819 | 79.89013885 | -1.2523 | 0.00095368 |
| AT3G06860 | 110.1395695 | 262.8126337 | -1.2547 | 5.32E-11   |
| AT2G44080 | 31.8715512  | 76.11951282 | -1.256  | 0.0012831  |
| AT4G30210 | 266.6756062 | 637.1415321 | -1.2565 | 3.60E-26   |
| AT5G04770 | 25.7192779  | 61.46120416 | -1.2568 | 0.0047535  |
| AT1G02170 | 38.99523609 | 93.2287284  | -1.2575 | 0.00026964 |
| AT4G17900 | 86.68691866 | 207.2901656 | -1.2578 | 7.97E-09   |
| AT3G46640 | 50.32837113 | 120.4715014 | -1.2592 | 2.22E-05   |
| AT1G09060 | 34.36946668 | 82.57670989 | -1.2646 | 0.00065409 |

|           |             |             |         |            |
|-----------|-------------|-------------|---------|------------|
| AT5G62460 | 34.55449746 | 83.04803814 | -1.2651 | 0.00062419 |
| AT4G30490 | 45.24002479 | 108.9239592 | -1.2676 | 5.65E-05   |
| AT2G38560 | 26.41314331 | 63.72357978 | -1.2706 | 0.0034226  |
| AT3G07310 | 25.16418557 | 60.84847743 | -1.2738 | 0.0043675  |
| AT5G10400 | 33.95314744 | 82.10538163 | -1.2739 | 0.00061796 |
| AT1G34220 | 28.54099723 | 69.09672186 | -1.2756 | 0.0020073  |
| AT1G63090 | 38.1163399  | 92.33320472 | -1.2764 | 0.00023183 |
| AT2G20900 | 46.99781716 | 113.9671715 | -1.278  | 3.02E-05   |
| AT3G53540 | 28.72602801 | 69.75658141 | -1.28   | 0.001818   |
| AT1G66480 | 40.89180155 | 99.30886286 | -1.2801 | 0.00011538 |
| AT4G32600 | 29.23486264 | 71.17056617 | -1.2836 | 0.0015353  |
| AT4G25170 | 70.95930268 | 172.8360703 | -1.2843 | 1.02E-07   |
| AT1G45145 | 177.814576  | 434.046188  | -1.2875 | 9.41E-19   |
| AT4G21680 | 27.47707027 | 67.1171432  | -1.2885 | 0.0021474  |
| AT1G15230 | 32.42664353 | 79.41881059 | -1.2923 | 0.00065058 |
| AT1G14040 | 88.53722642 | 217.6593871 | -1.2977 | 9.45E-10   |

|           |             |             |         |            |
|-----------|-------------|-------------|---------|------------|
| AT1G60940 | 73.27218739 | 180.3301895 | -1.2993 | 3.47E-08   |
| AT5G19340 | 24.05400091 | 59.24596137 | -1.3004 | 0.0040968  |
| AT1G73920 | 61.98531004 | 152.8988852 | -1.3026 | 4.64E-07   |
| AT4G21390 | 29.37363573 | 72.5374181  | -1.3042 | 0.0011111  |
| AT5G63320 | 62.03156773 | 153.1816822 | -1.3042 | 4.36E-07   |
| AT1G14000 | 64.94580246 | 160.3930044 | -1.3043 | 2.15E-07   |
| AT4G16130 | 32.79670509 | 81.02132665 | -1.3048 | 0.00048783 |
| AT4G33910 | 27.93964721 | 69.04958903 | -1.3053 | 0.0015329  |
| AT2G33770 | 74.84494898 | 185.043472  | -1.3059 | 1.85E-08   |
| AT5G52580 | 50.6059173  | 125.2790496 | -1.3078 | 6.31E-06   |
| AT1G30720 | 58.65475606 | 145.2633675 | -1.3084 | 8.67E-07   |
| AT4G11360 | 46.44272483 | 115.0512265 | -1.3088 | 1.69E-05   |
| AT1G25230 | 41.81695543 | 103.8336141 | -1.3121 | 4.83E-05   |
| AT3G50950 | 66.47230636 | 165.2005526 | -1.3134 | 1.10E-07   |
| AT3G54620 | 91.63649193 | 228.21714   | -1.3164 | 1.87E-10   |
| AT5G09390 | 33.81437436 | 84.22635877 | -1.3166 | 0.00031162 |

|           |             |             |         |           |
|-----------|-------------|-------------|---------|-----------|
| AT1G19850 | 25.53424712 | 63.62931413 | -1.3173 | 0.0023306 |
| AT4G35750 | 337.0335589 | 840.849603  | -1.319  | 1.27E-37  |
| AT1G34300 | 33.07425125 | 82.52957706 | -1.3192 | 0.0003589 |
| AT3G06250 | 22.5737547  | 56.46512468 | -1.3227 | 0.0045189 |
| AT2G46500 | 144.9716132 | 363.1584188 | -1.3248 | 1.43E-16  |
| AT3G12500 | 22.15743545 | 55.52246818 | -1.3253 | 0.0048711 |
| AT5G12310 | 23.96148552 | 60.0472194  | -1.3254 | 0.0030879 |
| AT3G15630 | 142.3349246 | 357.4082141 | -1.3283 | 2.18E-16  |
| AT1G03230 | 50.97597885 | 128.0127535 | -1.3284 | 3.35E-06  |
| AT3G48520 | 107.0865617 | 269.0341667 | -1.329  | 1.88E-12  |
| AT5G23050 | 99.26901144 | 249.521177  | -1.3297 | 1.36E-11  |
| AT3G20060 | 25.53424712 | 64.19490803 | -1.33   | 0.0019764 |
| AT1G01340 | 36.17351675 | 91.20201691 | -1.3341 | 0.0001267 |
| AT1G09940 | 84.97538398 | 214.8314176 | -1.3381 | 3.76E-10  |
| AT5G54810 | 179.017276  | 452.8993181 | -1.3391 | 5.77E-21  |
| AT1G27290 | 71.00556038 | 179.9059941 | -1.3412 | 1.27E-08  |

|           |             |             |         |            |
|-----------|-------------|-------------|---------|------------|
| AT4G35860 | 26.73694716 | 67.82413557 | -1.343  | 0.0012265  |
| AT2G20670 | 143.8151708 | 364.8552005 | -1.3431 | 4.75E-17   |
| AT4G21980 | 65.63966787 | 166.5202717 | -1.3431 | 4.88E-08   |
| AT1G63800 | 42.18701698 | 107.085779  | -1.3439 | 2.20E-05   |
| AT4G30780 | 53.47389433 | 135.9310681 | -1.346  | 1.08E-06   |
| AT2G46140 | 47.13659024 | 119.9059075 | -1.347  | 5.62E-06   |
| AT1G75220 | 74.19734127 | 188.8140981 | -1.3475 | 4.26E-09   |
| AT1G73880 | 21.41731235 | 54.57981167 | -1.3496 | 0.0044582  |
| AT1G32230 | 401.5630421 | 1025.13895  | -1.3521 | 6.72E-48   |
| AT4G27585 | 30.02124344 | 76.73223955 | -1.3538 | 0.00044166 |
| AT3G24070 | 35.89597059 | 91.86187647 | -1.3556 | 9.05E-05   |
| AT1G56140 | 107.8266848 | 276.8582157 | -1.3604 | 2.51E-13   |
| AT5G54540 | 55.50923287 | 142.5296636 | -1.3605 | 4.10E-07   |
| AT4G18340 | 131.5106242 | 337.9423572 | -1.3616 | 3.32E-16   |
| AT2G15490 | 42.788367   | 110.1965455 | -1.3648 | 1.17E-05   |
| AT5G54500 | 279.1651836 | 718.9641168 | -1.3648 | 3.20E-34   |



|           |             |             |         |            |
|-----------|-------------|-------------|---------|------------|
| AT5G18490 | 33.67560127 | 86.86579699 | -1.3671 | 0.0001325  |
| AT4G04620 | 24.65535093 | 63.62931413 | -1.3678 | 0.0015123  |
| AT1G76650 | 175.6404643 | 453.8419746 | -1.3696 | 7.31E-22   |
| AT1G73260 | 276.0196604 | 713.4024434 | -1.3699 | 3.45E-34   |
| AT3G26020 | 33.67560127 | 87.05432829 | -1.3702 | 0.00012508 |
| AT1G62300 | 52.22493659 | 135.0826772 | -1.371  | 7.33E-07   |
| AT1G31930 | 55.37045979 | 143.519453  | -1.3741 | 2.81E-07   |
| AT1G23390 | 28.49473954 | 74.04566851 | -1.3777 | 0.00045718 |
| AT4G30280 | 167.7766563 | 436.5913605 | -1.3797 | 2.57E-21   |
| AT4G23100 | 283.6059223 | 738.3828408 | -1.3805 | 7.28E-36   |
| AT2G44410 | 29.00357417 | 75.55391892 | -1.3813 | 0.00037631 |
| AT3G62650 | 85.99305325 | 224.0223185 | -1.3814 | 3.70E-11   |
| AT1G71950 | 52.54874045 | 136.9208574 | -1.3816 | 4.94E-07   |
| AT4G27520 | 92.56164581 | 241.1786669 | -1.3816 | 5.55E-12   |
| AT3G51600 | 21.0009931  | 54.8154758  | -1.3841 | 0.0033433  |
| AT3G47160 | 37.70002066 | 98.46047201 | -1.385  | 3.05E-05   |

|           |             |             |         |            |
|-----------|-------------|-------------|---------|------------|
| AT5G51070 | 106.7165002 | 278.7435287 | -1.3852 | 7.75E-14   |
| AT1G22930 | 214.1268658 | 559.8908315 | -1.3867 | 1.76E-27   |
| AT1G02360 | 40.01290536 | 104.6820049 | -1.3875 | 1.51E-05   |
| AT4G33540 | 29.97498575 | 78.61755256 | -1.3911 | 0.00024271 |
| AT3G59220 | 34.2306936  | 89.92943063 | -1.3935 | 6.93E-05   |
| AT4G39670 | 22.38872392 | 58.86889877 | -1.3947 | 0.0019975  |
| AT3G30775 | 1105.928949 | 2908.472382 | -1.395  | 1.59E-143  |
| AT2G36310 | 92.00655348 | 241.979925  | -1.3951 | 3.19E-12   |
| AT2G31260 | 33.4905705  | 88.09125044 | -1.3952 | 8.31E-05   |
| AT4G37790 | 50.18959805 | 132.0190436 | -1.3953 | 6.52E-07   |
| AT1G29930 | 50.18959805 | 132.0661764 | -1.3958 | 6.44E-07   |
| AT2G39660 | 50.65217499 | 133.2916299 | -1.3959 | 5.63E-07   |
| AT3G59110 | 20.67718924 | 54.4384132  | -1.3966 | 0.0031713  |
| AT5G17760 | 34.73952824 | 91.62621234 | -1.3992 | 5.35E-05   |
| AT3G17000 | 44.12984013 | 116.4180784 | -1.3995 | 3.43E-06   |
| AT3G61070 | 33.76811666 | 89.17530543 | -1.401  | 6.85E-05   |

|           |             |             |         |            |
|-----------|-------------|-------------|---------|------------|
| AT5G27030 | 42.0482439  | 111.2806005 | -1.4041 | 5.67E-06   |
| AT4G33980 | 29.69743958 | 78.61755256 | -1.4045 | 0.00020983 |
| AT5G10980 | 185.7246416 | 491.8310318 | -1.405  | 9.69E-25   |
| AT5G12010 | 44.73119015 | 118.4919227 | -1.4054 | 2.47E-06   |
| AT5G17380 | 94.9207882  | 251.4536229 | -1.4055 | 7.64E-13   |
| AT4G36648 | 163.5672062 | 433.7162582 | -1.4069 | 6.53E-22   |
| AT1G12200 | 43.5747478  | 115.6168204 | -1.4078 | 3.28E-06   |
| AT2G23320 | 65.68592556 | 174.2971879 | -1.4079 | 4.42E-09   |
| AT4G14370 | 27.43081258 | 72.9144807  | -1.4104 | 0.00037189 |
| AT3G29160 | 69.20151031 | 184.0065499 | -1.4109 | 1.38E-09   |
| AT4G16790 | 19.84455075 | 52.78876431 | -1.4115 | 0.003404   |
| AT4G17030 | 19.75203536 | 52.55310018 | -1.4118 | 0.0034827  |
| AT2G35510 | 50.32837113 | 133.9514894 | -1.4123 | 3.84E-07   |
| AT2G02220 | 57.31328294 | 152.8046196 | -1.4147 | 4.36E-08   |
| AT3G62150 | 54.95414054 | 146.6302194 | -1.4159 | 8.56E-08   |
| AT4G05020 | 84.55906473 | 225.9076316 | -1.4177 | 9.38E-12   |

|           |             |             |         |            |
|-----------|-------------|-------------|---------|------------|
| AT1G11330 | 29.65118189 | 79.27741212 | -1.4188 | 0.00016674 |
| AT4G24590 | 31.27020118 | 83.75503052 | -1.4214 | 9.81E-05   |
| AT5G01750 | 132.8058396 | 355.8528308 | -1.422  | 2.23E-18   |
| AT1G17060 | 18.45681993 | 49.48946654 | -1.423  | 0.0045584  |
| AT5G16630 | 24.37780477 | 65.37322866 | -1.4231 | 0.00076485 |
| AT1G72360 | 37.88505143 | 101.7126369 | -1.4248 | 1.23E-05   |
| AT3G23150 | 20.72344694 | 55.66386665 | -1.4255 | 0.0022289  |
| AT1G30420 | 49.0331557  | 132.1133093 | -1.4299 | 3.40E-07   |
| AT2G47450 | 21.64860082 | 58.35043769 | -1.4305 | 0.0015839  |
| AT3G16800 | 26.59817408 | 71.7832929  | -1.4323 | 0.00033857 |
| AT2G42330 | 25.58050481 | 69.14385468 | -1.4346 | 0.00044705 |
| AT1G13195 | 19.84455075 | 53.73142082 | -1.437  | 0.0025439  |
| AT5G47450 | 46.21143636 | 125.5147137 | -1.4415 | 5.93E-07   |
| AT3G20660 | 34.2306936  | 93.08732992 | -1.4433 | 2.56E-05   |
| AT2G24100 | 41.95572851 | 114.10857   | -1.4435 | 2.19E-06   |
| AT5G07460 | 28.26345107 | 76.87363803 | -1.4436 | 0.00016738 |

|           |             |             |         |            |
|-----------|-------------|-------------|---------|------------|
| AT3G05580 | 44.22235552 | 120.3301029 | -1.4441 | 1.04E-06   |
| AT1G77220 | 27.75461643 | 75.64818457 | -1.4466 | 0.00018706 |
| AT1G15110 | 50.42088652 | 137.4864513 | -1.4472 | 1.32E-07   |
| AT4G16760 | 167.5453679 | 456.9527411 | -1.4475 | 3.14E-24   |
| AT1G53440 | 45.05499401 | 122.9695412 | -1.4485 | 7.04E-07   |
| AT5G13800 | 34.78578593 | 95.16117424 | -1.4519 | 1.79E-05   |
| AT2G41430 | 727.1246929 | 1994.142705 | -1.4555 | 5.08E-106  |
| AT1G03370 | 62.44788698 | 171.6106168 | -1.4584 | 1.75E-09   |
| AT4G15420 | 21.09350849 | 58.06764074 | -1.4609 | 0.0012819  |
| AT1G09950 | 17.99424299 | 49.58373219 | -1.4623 | 0.0034183  |
| AT1G55450 | 46.07266328 | 127.0700969 | -1.4636 | 3.32E-07   |
| AT3G05500 | 94.78201512 | 261.6814459 | -1.4651 | 2.52E-14   |
| AT1G18570 | 41.72444004 | 115.3340235 | -1.4669 | 1.29E-06   |
| AT1G73730 | 18.41056223 | 50.95058413 | -1.4686 | 0.0027936  |
| AT1G53190 | 26.27437022 | 72.7259494  | -1.4688 | 0.00020931 |
| AT5G63620 | 57.91463296 | 160.2987388 | -1.4688 | 5.35E-09   |

|           |             |             |         |            |
|-----------|-------------|-------------|---------|------------|
| AT5G56870 | 160.8380022 | 445.3580661 | -1.4694 | 3.10E-24   |
| AT5G60200 | 25.44173173 | 70.46357379 | -1.4697 | 0.00027141 |
| AT1G17170 | 113.5163812 | 314.8472729 | -1.4718 | 2.76E-17   |
| AT4G18140 | 21.50982774 | 59.6701568  | -1.472  | 0.00096958 |
| AT5G06560 | 40.75302846 | 113.1187807 | -1.4729 | 1.53E-06   |
| AT4G30390 | 24.00774322 | 66.78721342 | -1.4761 | 0.00039663 |
| AT2G23790 | 46.85904408 | 130.5107932 | -1.4778 | 1.70E-07   |
| AT1G32530 | 39.04149378 | 109.0653577 | -1.4821 | 2.17E-06   |
| AT2G30250 | 42.18701698 | 118.0677273 | -1.4847 | 6.83E-07   |
| AT1G50460 | 60.45880613 | 169.2068427 | -1.4848 | 1.24E-09   |
| AT1G30700 | 79.14691453 | 221.5242788 | -1.4849 | 1.81E-12   |
| AT3G12350 | 24.8866394  | 69.75658141 | -1.487  | 0.00024935 |
| AT1G34260 | 30.48382038 | 85.45181223 | -1.4871 | 3.66E-05   |
| AT5G11950 | 16.93031602 | 47.46275505 | -1.4872 | 0.0037289  |
| AT5G19230 | 107.8729425 | 302.4513398 | -1.4874 | 6.47E-17   |
| AT2G33700 | 33.4905705  | 93.93572078 | -1.4879 | 1.29E-05   |

|           |             |             |         |            |
|-----------|-------------|-------------|---------|------------|
| AT1G42990 | 73.36470277 | 205.8761808 | -1.4886 | 1.14E-11   |
| AT4G26260 | 30.25253191 | 85.07474963 | -1.4917 | 3.63E-05   |
| AT2G40970 | 31.22394349 | 88.09125044 | -1.4963 | 2.36E-05   |
| AT5G57910 | 36.08100136 | 101.8069026 | -1.4965 | 4.28E-06   |
| AT1G09070 | 540.0585781 | 1524.369835 | -1.497  | 4.60E-85   |
| AT5G47370 | 33.58308588 | 94.87837728 | -1.4983 | 9.94E-06   |
| AT1G27300 | 45.24002479 | 128.0127535 | -1.5006 | 1.51E-07   |
| AT1G30730 | 73.9197951  | 209.5054084 | -1.503  | 4.74E-12   |
| AT5G23340 | 24.23903169 | 68.76679208 | -1.5044 | 0.00023729 |
| AT3G14590 | 51.02223654 | 144.7920393 | -1.5048 | 1.69E-08   |
| AT1G20780 | 41.30812079 | 117.6906647 | -1.5105 | 4.65E-07   |
| AT4G05010 | 21.41731235 | 61.03700873 | -1.5109 | 0.00058988 |
| AT1G26270 | 198.214219  | 566.6308255 | -1.5153 | 2.15E-32   |
| AT4G29670 | 76.00139133 | 217.3294574 | -1.5158 | 1.16E-12   |
| AT3G63010 | 35.29462056 | 100.9585117 | -1.5162 | 3.58E-06   |
| AT5G48970 | 19.28945842 | 55.1925384  | -1.5167 | 0.0011687  |

|           |             |             |         |            |
|-----------|-------------|-------------|---------|------------|
| AT5G13200 | 53.42763664 | 153.2759478 | -1.5205 | 4.05E-09   |
| AT3G09440 | 615.9674541 | 1771.770035 | -1.5243 | 5.63E-102  |
| AT1G19400 | 51.11475193 | 147.1486805 | -1.5255 | 7.99E-09   |
| AT4G38470 | 342.0293899 | 985.0760483 | -1.5261 | 7.73E-57   |
| AT2G34500 | 24.42406246 | 70.36930814 | -1.5266 | 0.00015619 |
| AT4G08555 | 29.41989342 | 84.79195267 | -1.5271 | 2.45E-05   |
| AT4G14040 | 50.28211344 | 144.9805706 | -1.5277 | 1.01E-08   |
| AT3G13110 | 78.12924526 | 225.4363033 | -1.5288 | 2.65E-13   |
| AT1G29520 | 19.24320073 | 55.66386665 | -1.5324 | 0.00097374 |
| AT2G46260 | 81.55231462 | 236.0883218 | -1.5335 | 5.58E-14   |
| AT4G29950 | 98.89894989 | 286.5204449 | -1.5346 | 6.64E-17   |
| AT3G51500 | 19.93706614 | 57.78484379 | -1.5352 | 0.00072392 |
| AT4G28260 | 89.78618416 | 260.314594  | -1.5357 | 2.04E-15   |
| AT5G16110 | 267.2306986 | 775.5235071 | -1.5371 | 2.49E-45   |
| AT5G43620 | 30.80762424 | 89.55236803 | -1.5394 | 1.14E-05   |
| AT5G58787 | 24.05400091 | 69.94511271 | -1.5399 | 0.00014395 |



|           |             |             |         |           |
|-----------|-------------|-------------|---------|-----------|
| AT3G25495 | 14.8024621  | 43.0794023  | -1.5412 | 0.0045872 |
| AT5G01600 | 58.83978684 | 171.3278199 | -1.5419 | 2.32E-10  |
| AT1G72680 | 30.85388194 | 89.92943063 | -1.5433 | 1.03E-05  |
| AT1G56220 | 152.3265865 | 444.3211439 | -1.5444 | 2.71E-26  |
| AT1G55020 | 127.763751  | 372.7263823 | -1.5446 | 4.01E-22  |
| AT1G61340 | 59.07107531 | 172.4118749 | -1.5453 | 1.84E-10  |
| AT2G35800 | 34.64701285 | 101.3355743 | -1.5483 | 2.14E-06  |
| AT2G46270 | 45.74885942 | 133.810091  | -1.5484 | 2.93E-08  |
| AT4G28300 | 91.91403809 | 269.1755652 | -1.5502 | 3.55E-16  |
| AT5G46180 | 38.62517454 | 113.2130463 | -1.5514 | 4.21E-07  |
| AT4G14680 | 24.8866394  | 72.96161353 | -1.5518 | 8.67E-05  |
| AT4G38810 | 40.75302846 | 119.5288449 | -1.5524 | 1.80E-07  |
| AT2G36320 | 347.6265708 | 1020.095737 | -1.5531 | 1.26E-60  |
| AT4G02880 | 40.66051308 | 119.6231106 | -1.5568 | 1.65E-07  |
| AT2G41250 | 26.04308175 | 76.8265052  | -1.5607 | 4.71E-05  |
| AT1G80120 | 15.31129673 | 45.24751227 | -1.5632 | 0.0029974 |

|           |             |             |         |            |
|-----------|-------------|-------------|---------|------------|
| AT5G14730 | 46.30395175 | 137.0622559 | -1.5656 | 1.34E-08   |
| AT4G00550 | 18.82688148 | 55.7581323  | -1.5664 | 0.00073346 |
| AT4G34710 | 336.570982  | 998.1789737 | -1.5684 | 2.59E-60   |
| AT1G01770 | 31.45523196 | 93.46439253 | -1.5711 | 4.44E-06   |
| AT4G36670 | 29.97498575 | 89.17530543 | -1.5729 | 7.80E-06   |
| AT2G42750 | 18.13301607 | 53.96708494 | -1.5735 | 0.00088215 |
| AT5G11070 | 78.6380799  | 234.0616103 | -1.5736 | 1.81E-14   |
| AT2G44790 | 466.0000099 | 1387.590376 | -1.5742 | 2.60E-84   |
| AT1G77770 | 20.39964308 | 60.75421178 | -1.5744 | 0.00035243 |
| AT5G46910 | 43.48223241 | 129.5681367 | -1.5752 | 3.11E-08   |
| AT2G26660 | 23.96148552 | 71.5947616  | -1.5791 | 7.85E-05   |
| AT5G57610 | 17.57792374 | 52.60023301 | -1.5813 | 0.00099632 |
| AT3G12740 | 94.87453051 | 283.9281395 | -1.5814 | 1.31E-17   |
| AT5G60270 | 15.86638906 | 47.55702071 | -1.5837 | 0.0019322  |
| AT5G27520 | 32.61167431 | 97.84774528 | -1.5852 | 2.02E-06   |
| AT4G11850 | 103.8485232 | 311.830772  | -1.5863 | 2.10E-19   |

|           |             |             |         |            |
|-----------|-------------|-------------|---------|------------|
| AT3G20340 | 34.55449746 | 103.7864813 | -1.5867 | 8.63E-07   |
| AT5G04340 | 122.9992085 | 370.1812097 | -1.5896 | 4.81E-23   |
| AT1G03740 | 71.51439501 | 216.2454024 | -1.5964 | 1.05E-13   |
| AT4G31780 | 27.15326641 | 82.10538163 | -1.5964 | 1.54E-05   |
| AT4G09150 | 80.71967613 | 244.2894334 | -1.5976 | 1.86E-15   |
| AT5G22920 | 126.4222779 | 383.2370023 | -1.6    | 4.23E-24   |
| AT5G55700 | 21.09350849 | 64.00637673 | -1.6014 | 0.00017755 |
| AT3G49845 | 15.21878134 | 46.28443442 | -1.6047 | 0.0019971  |
| AT5G66650 | 78.86936837 | 240.094612  | -1.6061 | 2.47E-15   |
| AT5G47230 | 78.82311067 | 240.1888776 | -1.6075 | 2.33E-15   |
| AT3G45730 | 50.97597885 | 155.3969249 | -1.6081 | 4.25E-10   |
| AT1G06760 | 151.4014326 | 462.2316175 | -1.6102 | 2.65E-29   |
| AT3G22530 | 15.31129673 | 46.75576268 | -1.6105 | 0.001803   |
| AT1G21000 | 57.54457141 | 175.8997039 | -1.612  | 2.06E-11   |
| AT5G11530 | 26.69068947 | 81.63405338 | -1.6128 | 1.35E-05   |
| AT1G69830 | 25.6730202  | 78.52328691 | -1.6129 | 2.08E-05   |

|           |             |             |         |            |
|-----------|-------------|-------------|---------|------------|
| AT1G01650 | 68.4613872  | 209.6468068 | -1.6146 | 1.52E-13   |
| AT4G35985 | 51.57732887 | 158.083496  | -1.6159 | 2.43E-10   |
| AT1G66500 | 58.65475606 | 179.9059941 | -1.6169 | 1.02E-11   |
| AT1G02400 | 60.13500227 | 184.525011  | -1.6175 | 5.15E-12   |
| AT4G20780 | 35.52590904 | 109.0182249 | -1.6176 | 2.58E-07   |
| AT2G39350 | 33.4905705  | 102.8438248 | -1.6186 | 6.12E-07   |
| AT4G00755 | 16.83780064 | 51.70470933 | -1.6186 | 0.00085671 |
| AT1G59740 | 28.12467799 | 86.58300004 | -1.6222 | 5.96E-06   |
| AT3G15070 | 22.15743545 | 68.248331   | -1.623  | 8.04E-05   |
| AT1G20440 | 1571.558898 | 4849.637791 | -1.6257 | 0          |
| AT3G10420 | 15.86638906 | 48.97100546 | -1.626  | 0.0011913  |
| AT1G54710 | 29.88247036 | 92.23893907 | -1.6261 | 2.52E-06   |
| AT2G46030 | 20.90847771 | 64.76050193 | -1.631  | 0.0001214  |
| AT4G05050 | 574.6593333 | 1782.799116 | -1.6334 | 3.74E-115  |
| AT2G25900 | 93.67183046 | 290.809532  | -1.6344 | 5.04E-19   |
| AT4G32480 | 127.2549163 | 395.7743339 | -1.637  | 8.10E-26   |

|           |             |             |         |            |
|-----------|-------------|-------------|---------|------------|
| AT5G04760 | 29.51240881 | 91.86187647 | -1.6381 | 2.26E-06   |
| AT1G62770 | 35.43339365 | 110.3850768 | -1.6394 | 1.51E-07   |
| AT5G64300 | 88.99980336 | 277.2824111 | -1.6395 | 3.06E-18   |
| AT1G76180 | 993.8928145 | 3096.720886 | -1.6396 | 3.03E-201  |
| AT5G54730 | 48.52432107 | 151.2021035 | -1.6397 | 3.84E-10   |
| AT2G22470 | 160.2829099 | 500.2678075 | -1.6421 | 1.05E-32   |
| AT4G17260 | 17.67043913 | 55.33393688 | -1.6468 | 0.00040892 |
| AT1G18270 | 292.9962342 | 919.5142883 | -1.65   | 1.97E-60   |
| AT1G23870 | 171.9398488 | 540.2364433 | -1.6517 | 1.21E-35   |
| AT2G02180 | 69.61782955 | 219.4504345 | -1.6564 | 9.28E-15   |
| AT4G21470 | 28.07842029 | 88.5625787  | -1.6572 | 2.86E-06   |
| AT4G13830 | 19.75203536 | 62.30959502 | -1.6575 | 0.00013564 |
| AT1G35670 | 68.09132565 | 215.2084802 | -1.6602 | 1.55E-14   |
| AT2G34910 | 12.25828892 | 38.7903152  | -1.6619 | 0.0040824  |
| AT1G19310 | 15.77387367 | 50.00792762 | -1.6646 | 0.00077927 |
| AT4G21410 | 81.22851076 | 257.5808901 | -1.665  | 2.14E-17   |

|           |             |             |         |           |
|-----------|-------------|-------------|---------|-----------|
| AT2G30620 | 138.0792168 | 437.9582125 | -1.6653 | 2.43E-29  |
| AT3G54640 | 74.89120668 | 237.5965722 | -1.6656 | 4.35E-16  |
| AT5G08660 | 28.35596646 | 89.97656346 | -1.6659 | 2.07E-06  |
| AT5G55180 | 46.21143636 | 146.7244851 | -1.6668 | 4.12E-10  |
| AT5G62540 | 42.41830545 | 134.7056146 | -1.6671 | 2.49E-09  |
| AT5G56550 | 23.3601355  | 74.70552807 | -1.6772 | 1.78E-05  |
| AT5G07440 | 984.132441  | 3147.812869 | -1.6774 | 2.46E-212 |
| AT3G43230 | 45.61008634 | 145.9232271 | -1.6778 | 3.67E-10  |
| AT5G39660 | 27.93964721 | 89.41096955 | -1.6781 | 1.93E-06  |
| AT3G23250 | 90.80385343 | 290.8566648 | -1.6795 | 7.14E-20  |
| AT4G39675 | 27.80087413 | 89.1281726  | -1.6808 | 1.94E-06  |
| AT3G58750 | 63.88187549 | 205.02779   | -1.6823 | 3.72E-14  |
| AT2G41630 | 103.8947809 | 333.4647388 | -1.6824 | 8.51E-23  |
| AT1G66580 | 336.3396935 | 1080.425754 | -1.6836 | 2.34E-73  |
| AT5G13310 | 12.81338125 | 41.24122212 | -1.6864 | 0.0024632 |
| AT1G68440 | 262.2811253 | 844.4316977 | -1.6869 | 1.58E-57  |

|           |             |             |         |            |
|-----------|-------------|-------------|---------|------------|
| AT1G20450 | 553.7971132 | 1783.223312 | -1.6871 | 1.98E-121  |
| AT4G34310 | 26.13559714 | 84.2734916  | -1.6891 | 3.64E-06   |
| AT2G19800 | 187.7599802 | 605.5154063 | -1.6893 | 2.11E-41   |
| AT3G44300 | 239.5685975 | 772.6484048 | -1.6894 | 9.05E-53   |
| AT1G74750 | 12.53583509 | 40.43996409 | -1.6897 | 0.0027272  |
| AT5G06570 | 30.25253191 | 97.65921398 | -1.6907 | 4.59E-07   |
| AT5G53970 | 23.91522783 | 77.20356781 | -1.6907 | 1.05E-05   |
| AT5G62480 | 26.78320486 | 86.58300004 | -1.6928 | 2.44E-06   |
| AT4G34890 | 104.2185847 | 337.0939664 | -1.6935 | 2.79E-23   |
| AT2G33830 | 472.2910563 | 1528.611789 | -1.6945 | 7.55E-105  |
| AT5G17650 | 17.1153468  | 55.61673383 | -1.7002 | 0.00025579 |
| AT2G23450 | 61.4764754  | 199.9845777 | -1.7018 | 4.56E-14   |
| AT5G05730 | 54.53782129 | 177.5493528 | -1.7029 | 1.48E-12   |
| AT3G43430 | 51.71610195 | 168.4055847 | -1.7033 | 6.20E-12   |
| AT1G62320 | 11.74945429 | 38.31898695 | -1.7055 | 0.0034226  |
| AT4G27450 | 40.75302846 | 132.9145673 | -1.7055 | 1.53E-09   |

|           |             |             |         |            |
|-----------|-------------|-------------|---------|------------|
| AT4G39090 | 363.5854753 | 1188.12426  | -1.7083 | 1.42E-82   |
| AT5G12340 | 32.24161276 | 105.4361301 | -1.7094 | 1.05E-07   |
| AT1G32170 | 135.9976205 | 444.8867378 | -1.7099 | 4.35E-31   |
| AT3G20500 | 28.7722857  | 94.12425208 | -1.7099 | 6.04E-07   |
| AT4G30790 | 36.40480522 | 119.1989151 | -1.7112 | 1.18E-08   |
| AT2G02710 | 66.37979097 | 217.9421841 | -1.7151 | 1.74E-15   |
| AT1G02750 | 14.89497749 | 48.92387264 | -1.7157 | 0.00063825 |
| AT2G30870 | 712.7848077 | 2346.743371 | -1.7191 | 1.20E-164  |
| AT4G11280 | 272.5965911 | 897.4561261 | -1.7191 | 4.97E-63   |
| AT4G23730 | 15.08000826 | 49.67799784 | -1.72   | 0.00055199 |
| AT1G63440 | 49.91205189 | 165.624748  | -1.7305 | 4.93E-12   |
| AT3G49590 | 28.40222415 | 94.26565056 | -1.7307 | 4.43E-07   |
| AT4G34230 | 121.1951584 | 402.2315309 | -1.7307 | 1.10E-28   |
| AT3G18830 | 48.52432107 | 161.0999968 | -1.7312 | 1.00E-11   |
| AT1G08800 | 55.97180981 | 186.0332614 | -1.7328 | 1.74E-13   |
| AT5G02490 | 24.28528938 | 80.78566253 | -1.734  | 3.64E-06   |



|           |             |             |         |            |
|-----------|-------------|-------------|---------|------------|
| AT5G15960 | 22.24995084 | 74.04566851 | -1.7346 | 1.06E-05   |
| AT1G15800 | 14.10859669 | 47.03855963 | -1.7373 | 0.00073557 |
| AT1G15430 | 25.90430867 | 86.39446873 | -1.7377 | 1.41E-06   |
| AT4G33030 | 18.73436609 | 62.54525914 | -1.7392 | 6.27E-05   |
| AT3G05360 | 15.49632751 | 51.89324063 | -1.7436 | 0.00032581 |
| AT3G26460 | 42.09450159 | 140.9742804 | -1.7437 | 1.97E-10   |
| AT5G52660 | 11.33313504 | 37.98905717 | -1.745  | 0.0029099  |
| AT3G50930 | 104.773677  | 351.8936735 | -1.7479 | 1.58E-25   |
| AT4G08770 | 41.07683232 | 138.0049124 | -1.7483 | 2.90E-10   |
| AT5G13330 | 16.69902755 | 56.27659338 | -1.7528 | 0.00015067 |
| AT5G18400 | 55.13917132 | 185.9389957 | -1.7537 | 9.89E-14   |
| AT1G70290 | 117.7258314 | 397.4239827 | -1.7552 | 5.57E-29   |
| AT4G14630 | 42.92714008 | 145.0748362 | -1.7568 | 7.57E-11   |
| AT5G46050 | 10.73178502 | 36.29227546 | -1.7578 | 0.0035484  |
| AT2G03270 | 10.68552733 | 36.19800981 | -1.7603 | 0.0035557  |
| AT1G14870 | 270.9775718 | 918.5716318 | -1.7612 | 4.72E-67   |

|           |             |             |         |            |
|-----------|-------------|-------------|---------|------------|
| AT4G22212 | 325.6541662 | 1106.631605 | -1.7648 | 5.19E-81   |
| AT4G15260 | 16.00516214 | 54.48554602 | -1.7673 | 0.00017907 |
| AT4G32070 | 82.75501467 | 281.7128967 | -1.7673 | 7.32E-21   |
| AT2G29670 | 10.59301194 | 36.15087699 | -1.7709 | 0.0033918  |
| AT5G66170 | 60.50506383 | 206.5360404 | -1.7713 | 1.88E-15   |
| AT2G26670 | 52.96505969 | 180.9900491 | -1.7728 | 1.33E-13   |
| AT1G28260 | 13.78479283 | 47.1799581  | -1.7751 | 0.00055802 |
| AT2G34930 | 26.87572025 | 92.00327494 | -1.7754 | 3.48E-07   |
| AT3G49570 | 11.14810427 | 38.17758848 | -1.7759 | 0.0023827  |
| AT1G76590 | 24.42406246 | 83.84929617 | -1.7795 | 1.27E-06   |
| AT5G18470 | 31.31645888 | 107.6042401 | -1.7807 | 2.43E-08   |
| AT1G62570 | 65.54715248 | 225.8604987 | -1.7848 | 4.69E-17   |
| AT1G52240 | 26.18185484 | 90.44789171 | -1.7885 | 3.77E-07   |
| AT2G32140 | 15.68135829 | 54.20274907 | -1.7893 | 0.00015769 |
| AT1G78850 | 153.3442558 | 530.3856829 | -1.7903 | 8.55E-40   |
| AT3G51430 | 15.86638906 | 55.09827275 | -1.796  | 0.00012902 |

|           |             |             |         |            |
|-----------|-------------|-------------|---------|------------|
| AT4G32190 | 20.26087    | 70.65210509 | -1.802  | 9.03E-06   |
| AT3G13100 | 12.72086587 | 44.44625424 | -1.8049 | 0.00071681 |
| AT4G33150 | 139.7907514 | 488.9559294 | -1.8064 | 3.18E-37   |
| AT5G55970 | 22.15743545 | 77.53349758 | -1.807  | 2.66E-06   |
| AT4G21990 | 276.9448143 | 969.8521457 | -1.8082 | 9.08E-74   |
| AT5G40690 | 39.73535919 | 139.6545613 | -1.8134 | 5.72E-11   |
| AT3G50910 | 48.10800182 | 169.1125771 | -1.8136 | 3.44E-13   |
| AT5G59690 | 74.61366051 | 262.3884383 | -1.8142 | 2.91E-20   |
| AT3G14780 | 13.27595819 | 46.75576268 | -1.8163 | 0.00044937 |
| AT5G49665 | 13.41473128 | 47.41562223 | -1.8215 | 0.00038813 |
| AT3G02555 | 9.714115752 | 34.35982963 | -1.8226 | 0.0035005  |
| AT5G18670 | 142.0573784 | 502.4830503 | -1.8226 | 8.95E-39   |
| AT3G57750 | 10.36172347 | 36.66933807 | -1.8233 | 0.0023685  |
| AT4G03320 | 20.67718924 | 73.48007461 | -1.8293 | 4.16E-06   |
| AT5G23360 | 19.24320073 | 68.6253936  | -1.8344 | 9.17E-06   |
| AT5G57655 | 173.7901566 | 620.6921761 | -1.8365 | 2.09E-48   |

|           |             |             |         |          |
|-----------|-------------|-------------|---------|----------|
| AT5G05600 | 69.43279878 | 248.6727862 | -1.8406 | 1.19E-19 |
| AT2G15890 | 54.35279052 | 195.3655608 | -1.8458 | 1.39E-15 |
| AT5G13740 | 45.84137481 | 165.1534198 | -1.8491 | 2.85E-13 |
| AT1G36370 | 69.89537572 | 252.5376778 | -1.8532 | 3.69E-20 |
| AT3G46930 | 30.48382038 | 110.2908112 | -1.8552 | 4.53E-09 |
| AT3G54130 | 17.06908911 | 61.79113394 | -1.856  | 2.45E-05 |
| AT2G38290 | 22.66627009 | 82.15251446 | -1.8578 | 6.52E-07 |
| AT1G77680 | 27.52332796 | 99.78019111 | -1.8581 | 2.88E-08 |
| AT2G24500 | 66.84236791 | 242.4983861 | -1.8591 | 1.82E-19 |
| AT1G29760 | 29.46615111 | 107.368576  | -1.8654 | 6.50E-09 |
| AT5G17460 | 50.65217499 | 184.8078079 | -1.8673 | 5.00E-15 |
| AT4G28240 | 29.23486264 | 106.7558493 | -1.8686 | 6.91E-09 |
| AT5G47040 | 72.3932912  | 264.7922124 | -1.8709 | 2.02E-21 |
| AT3G10960 | 18.87313917 | 69.14385468 | -1.8733 | 5.66E-06 |
| AT1G21130 | 17.67043913 | 65.18469736 | -1.8832 | 1.05E-05 |
| AT3G03640 | 36.589836   | 135.1298101 | -1.8848 | 2.98E-11 |

|           |             |             |         |           |
|-----------|-------------|-------------|---------|-----------|
| AT3G22890 | 317.2352658 | 1173.418818 | -1.8871 | 2.51E-95  |
| AT4G01700 | 19.05816995 | 70.51070662 | -1.8874 | 3.80E-06  |
| AT2G35170 | 8.280127236 | 30.63633643 | -1.8875 | 0.0049686 |
| AT5G54170 | 25.62676251 | 95.06690859 | -1.8913 | 4.15E-08  |
| AT3G02840 | 30.90013963 | 114.8155624 | -1.8936 | 1.07E-09  |
| AT1G17180 | 32.19535506 | 119.764509  | -1.8953 | 4.15E-10  |
| AT4G27020 | 28.44848184 | 106.4730523 | -1.9041 | 4.17E-09  |
| AT3G51730 | 120.7325815 | 452.8521853 | -1.9072 | 1.75E-37  |
| AT3G25900 | 19.79829306 | 74.28133264 | -1.9076 | 1.53E-06  |
| AT2G43400 | 34.46198207 | 129.3324726 | -1.908  | 5.54E-11  |
| AT1G69890 | 100.1479076 | 375.9785472 | -1.9085 | 3.39E-31  |
| AT3G06780 | 23.22136242 | 87.19572676 | -1.9088 | 1.40E-07  |
| AT1G56660 | 1009.62043  | 3791.930059 | -1.9091 | 0         |
| AT1G55920 | 76.60274136 | 287.840164  | -1.9098 | 5.42E-24  |
| AT1G09932 | 16.3752237  | 61.60260264 | -1.9115 | 1.55E-05  |
| AT3G61740 | 9.852888834 | 37.09353349 | -1.9125 | 0.0013707 |

|           |             |             |         |            |
|-----------|-------------|-------------|---------|------------|
| AT5G16650 | 15.45006981 | 58.25617204 | -1.9148 | 2.77E-05   |
| AT4G13300 | 8.742704177 | 32.99297769 | -1.916  | 0.0028358  |
| AT3G15850 | 15.31129673 | 57.83197662 | -1.9173 | 2.94E-05   |
| AT2G15480 | 61.33770232 | 231.9406332 | -1.9189 | 1.54E-19   |
| AT5G43190 | 26.96823563 | 102.1368324 | -1.9212 | 7.16E-09   |
| AT3G53180 | 75.16875284 | 284.7765303 | -1.9216 | 5.83E-24   |
| AT1G64065 | 8.141354154 | 30.91913338 | -1.9252 | 0.003988   |
| AT4G35110 | 12.4433197  | 47.27422375 | -1.9257 | 0.00019423 |
| AT1G25275 | 61.43021771 | 234.0144775 | -1.9296 | 7.14E-20   |
| AT1G15030 | 21.23228157 | 81.06845948 | -1.9329 | 3.24E-07   |
| AT5G54940 | 361.7814252 | 1387.920306 | -1.9397 | 1.62E-117  |
| AT2G38870 | 27.06075102 | 103.8807469 | -1.9407 | 3.85E-09   |
| AT1G08570 | 53.7051828  | 206.5831732 | -1.9436 | 9.06E-18   |
| AT2G36950 | 94.64324204 | 364.3838722 | -1.9449 | 4.13E-31   |
| AT3G48390 | 12.58209278 | 48.45254439 | -1.9452 | 0.00013608 |
| AT5G20910 | 15.95890445 | 61.50833699 | -1.9464 | 1.15E-05   |

|           |             |             |         |            |
|-----------|-------------|-------------|---------|------------|
| AT2G32560 | 17.48540835 | 67.39994015 | -1.9466 | 3.72E-06   |
| AT2G40113 | 8.280127236 | 32.09745401 | -1.9547 | 0.0027936  |
| AT5G65207 | 64.20567935 | 248.9555831 | -1.9551 | 1.58E-21   |
| AT4G36500 | 98.57514603 | 382.4828771 | -1.9561 | 6.57E-33   |
| AT5G19855 | 7.540004131 | 29.2694845  | -1.9568 | 0.0047402  |
| AT5G11920 | 13.04466972 | 50.66778717 | -1.9576 | 8.24E-05   |
| AT5G20250 | 1134.793751 | 4413.70629  | -1.9596 | 0          |
| AT5G13820 | 22.85130086 | 88.89250847 | -1.9598 | 5.23E-08   |
| AT4G14930 | 12.30454662 | 47.88695048 | -1.9604 | 0.00013608 |
| AT5G49360 | 100.7955153 | 392.4279033 | -1.961  | 6.89E-34   |
| AT4G12400 | 43.52849011 | 170.0081008 | -1.9656 | 6.08E-15   |
| AT1G76680 | 285.4099723 | 1115.681107 | -1.9668 | 1.84E-96   |
| AT3G09370 | 9.344054199 | 36.57507242 | -1.9687 | 0.0011192  |
| AT5G54640 | 22.52749701 | 88.18551609 | -1.9689 | 5.32E-08   |
| AT4G15120 | 9.991661916 | 39.16737781 | -1.9709 | 0.00067592 |
| AT3G47950 | 11.05558888 | 43.59786338 | -1.9795 | 0.0002726  |

|           |             |             |         |            |
|-----------|-------------|-------------|---------|------------|
| AT2G43140 | 20.49215847 | 81.02132665 | -1.9832 | 1.80E-07   |
| AT5G66850 | 30.25253191 | 119.764509  | -1.9851 | 8.35E-11   |
| AT5G47070 | 10.8705581  | 43.0794023  | -1.9866 | 0.00028888 |
| AT3G07565 | 19.4744892  | 77.48636476 | -1.9924 | 3.24E-07   |
| AT5G20010 | 204.2277193 | 812.7584391 | -1.9926 | 1.14E-71   |
| AT4G32870 | 31.64026273 | 125.986042  | -1.9934 | 2.07E-11   |
| AT5G01410 | 75.86261825 | 303.7710589 | -2.0015 | 4.15E-27   |
| AT5G27610 | 9.529084976 | 38.17758848 | -2.0023 | 0.00068637 |
| AT5G21170 | 68.13758334 | 273.4175194 | -2.0046 | 1.73E-24   |
| AT1G19380 | 58.88604453 | 236.5596501 | -2.0062 | 2.92E-21   |
| AT3G14075 | 20.58467386 | 82.81237401 | -2.0083 | 9.38E-08   |
| AT3G11170 | 24.05400091 | 96.85795595 | -2.0096 | 5.43E-09   |
| AT1G58200 | 19.98332383 | 80.7385297  | -2.0145 | 1.32E-07   |
| AT5G52190 | 8.002581072 | 32.38025097 | -2.0166 | 0.0019869  |
| AT5G16120 | 52.22493659 | 211.6263855 | -2.0187 | 3.08E-19   |
| AT1G57990 | 88.58348412 | 359.4820584 | -2.0208 | 1.81E-32   |



|           |             |             |         |            |
|-----------|-------------|-------------|---------|------------|
| AT4G37390 | 10.45423886 | 42.46667558 | -2.0222 | 0.00026105 |
| AT1G76070 | 32.47290123 | 132.3489734 | -2.027  | 2.99E-12   |
| AT2G40420 | 20.16835461 | 82.24678011 | -2.0279 | 8.28E-08   |
| AT1G64400 | 6.892396414 | 28.13829669 | -2.0295 | 0.0043595  |
| AT4G36040 | 196.1788805 | 803.614671  | -2.0343 | 4.68E-73   |
| AT4G22530 | 10.63926963 | 43.59786338 | -2.0349 | 0.00019262 |
| AT5G40590 | 13.36847358 | 54.8154758  | -2.0357 | 1.99E-05   |
| AT5G21990 | 59.71868303 | 245.1378243 | -2.0373 | 1.62E-22   |
| AT5G51440 | 20.76970463 | 85.45181223 | -2.0406 | 3.69E-08   |
| AT4G39780 | 14.84871979 | 61.13127439 | -2.0416 | 5.27E-06   |
| AT5G65280 | 25.16418557 | 103.59795   | -2.0416 | 8.71E-10   |
| AT5G13700 | 11.79571198 | 48.68820851 | -2.0453 | 6.43E-05   |
| AT5G10695 | 41.2618631  | 170.5265619 | -2.0471 | 6.96E-16   |
| AT4G20830 | 400.6378882 | 1656.624543 | -2.0479 | 6.54E-152  |
| AT2G45180 | 8.973992647 | 37.18779914 | -2.051  | 0.00064156 |
| AT3G15450 | 774.585087  | 3210.263863 | -2.0512 | 2.34E-295  |

|           |             |             |         |            |
|-----------|-------------|-------------|---------|------------|
| AT3G28580 | 15.17252365 | 62.92232175 | -2.0521 | 3.31E-06   |
| AT4G34350 | 127.9025241 | 531.0455424 | -2.0538 | 5.50E-49   |
| AT5G51130 | 9.80663114  | 40.76989387 | -2.0557 | 0.00030066 |
| AT4G03430 | 88.7222572  | 369.2385532 | -2.0572 | 3.26E-34   |
| AT1G32870 | 10.9168158  | 45.43604357 | -2.0573 | 0.00011496 |
| AT3G14050 | 53.33512125 | 222.7025994 | -2.062  | 7.71E-21   |
| AT2G29440 | 16.88405833 | 70.51070662 | -2.0622 | 6.22E-07   |
| AT5G53050 | 9.251538811 | 38.7903152  | -2.0679 | 0.00041999 |
| AT2G27150 | 23.54516627 | 98.93180026 | -2.071  | 1.47E-09   |
| AT5G17850 | 25.90430867 | 108.9239592 | -2.0721 | 1.78E-10   |
| AT5G46710 | 10.63926963 | 44.77618401 | -2.0733 | 0.0001186  |
| AT5G54490 | 21.32479696 | 90.07082911 | -2.0785 | 8.57E-09   |
| AT3G57520 | 727.4947544 | 3076.689436 | -2.0804 | 6.39E-289  |
| AT5G66050 | 59.9037138  | 253.8573969 | -2.0833 | 4.63E-24   |
| AT5G35735 | 152.0952981 | 644.8713155 | -2.084  | 9.93E-61   |
| AT2G41880 | 16.328966   | 69.28525316 | -2.0851 | 6.37E-07   |

|           |             |             |         |            |
|-----------|-------------|-------------|---------|------------|
| AT3G03150 | 35.61842442 | 151.2492363 | -2.0862 | 1.62E-14   |
| AT1G32200 | 13.73853513 | 58.35043769 | -2.0865 | 6.33E-06   |
| AT5G56580 | 6.522334862 | 27.71410126 | -2.0872 | 0.0037583  |
| AT4G18250 | 9.667858058 | 41.24122212 | -2.0928 | 0.0002189  |
| AT5G11520 | 100.1941653 | 428.107452  | -2.0952 | 1.10E-40   |
| AT1G67810 | 22.66627009 | 96.85795595 | -2.0953 | 1.61E-09   |
| ATMG00020 | 14.10859669 | 60.33001636 | -2.0963 | 3.82E-06   |
| AT1G58420 | 6.337304086 | 27.14850736 | -2.0989 | 0.0040515  |
| AT3G17790 | 27.38455488 | 117.3136021 | -2.0989 | 1.88E-11   |
| AT2G19810 | 12.4433197  | 53.30722539 | -2.099  | 1.66E-05   |
| AT4G05120 | 9.714115752 | 41.61828472 | -2.0991 | 0.00019492 |
| AT1G33590 | 50.09708266 | 214.7842848 | -2.1001 | 1.22E-20   |
| AT2G32150 | 279.257699  | 1197.833622 | -2.1008 | 5.10E-114  |
| AT2G37430 | 7.817550296 | 33.5585716  | -2.1019 | 0.0010468  |
| AT5G41080 | 516.8372157 | 2223.491032 | -2.105  | 3.58E-212  |
| AT5G52750 | 9.529084976 | 41.09982364 | -2.1087 | 0.00020556 |

|           |             |             |         |           |
|-----------|-------------|-------------|---------|-----------|
| AT5G47740 | 28.49473954 | 123.1109396 | -2.1112 | 4.34E-12  |
| AT4G38060 | 35.29462056 | 152.9931509 | -2.1159 | 5.65E-15  |
| AT5G03030 | 15.45006981 | 66.97574472 | -2.116  | 7.63E-07  |
| AT4G04610 | 121.1951584 | 525.483869  | -2.1163 | 1.34E-50  |
| AT5G64310 | 119.1598199 | 517.7540857 | -2.1194 | 5.78E-50  |
| AT4G36790 | 22.15743545 | 96.38662769 | -2.121  | 1.25E-09  |
| AT4G39660 | 223.8872392 | 976.5921398 | -2.125  | 1.59E-94  |
| AT3G11580 | 7.077427191 | 30.91913338 | -2.1272 | 0.0016248 |
| AT3G06420 | 29.92872805 | 131.2649184 | -2.1329 | 4.81E-13  |
| AT3G62770 | 32.05658198 | 140.7386163 | -2.1343 | 5.79E-14  |
| AT1G02660 | 45.51757095 | 200.173109  | -2.1368 | 9.75E-20  |
| AT3G10020 | 104.2185847 | 458.5552571 | -2.1375 | 8.09E-45  |
| AT1G62975 | 27.10700872 | 119.3403136 | -2.1383 | 6.10E-12  |
| AT3G55840 | 12.07325815 | 53.54288952 | -2.1489 | 1.08E-05  |
| AT5G62520 | 56.75819061 | 251.7835526 | -2.1493 | 6.27E-25  |
| AT2G16900 | 57.68334449 | 256.1197726 | -2.1506 | 2.24E-25  |

|           |             |             |         |           |
|-----------|-------------|-------------|---------|-----------|
| AT2G15695 | 25.58050481 | 113.5901089 | -2.1507 | 1.77E-11  |
| AT5G24490 | 35.75719751 | 158.9318868 | -2.1521 | 6.68E-16  |
| AT5G42940 | 52.78002892 | 235.0513997 | -2.1549 | 2.19E-23  |
| AT5G28610 | 41.12309002 | 183.6766201 | -2.1591 | 2.11E-18  |
| AT1G10370 | 41.53940926 | 186.1746598 | -2.1641 | 1.04E-18  |
| AT5G64410 | 27.29203949 | 123.6765335 | -2.18   | 1.09E-12  |
| AT1G78895 | 18.08675838 | 82.10538163 | -2.1825 | 1.33E-08  |
| AT2G46980 | 5.643438675 | 25.64025695 | -2.1838 | 0.0040725 |
| AT5G60800 | 10.68552733 | 48.64107569 | -2.1865 | 2.41E-05  |
| AT1G29640 | 11.51816582 | 52.55310018 | -2.1899 | 9.82E-06  |
| AT1G22770 | 27.29203949 | 125.2790496 | -2.1986 | 5.42E-13  |
| AT5G58650 | 11.56442351 | 53.11869409 | -2.1995 | 8.04E-06  |
| AT5G23510 | 28.44848184 | 130.6993245 | -2.1998 | 1.53E-13  |
| AT5G42380 | 84.23526088 | 389.5056681 | -2.2091 | 6.75E-40  |
| AT5G47860 | 12.25828892 | 56.70078881 | -2.2096 | 3.27E-06  |
| AT2G33150 | 200.480846  | 928.233861  | -2.211  | 5.43E-95  |

|           |             |             |         |            |
|-----------|-------------|-------------|---------|------------|
| AT3G17690 | 10.63926963 | 49.34806807 | -2.2136 | 1.71E-05   |
| AT2G20562 | 6.753623332 | 31.39046164 | -2.2166 | 0.0009889  |
| AT3G22370 | 50.05082497 | 232.9304225 | -2.2184 | 4.02E-24   |
| AT3G19210 | 6.984911802 | 32.75731357 | -2.2295 | 0.00068465 |
| AT3G53620 | 65.63966787 | 308.1544117 | -2.231  | 4.77E-32   |
| AT4G01010 | 5.13460404  | 24.13200654 | -2.2326 | 0.0048284  |
| AT1G02610 | 6.106015615 | 28.70389059 | -2.2329 | 0.0016938  |
| AT3G61060 | 62.95672161 | 296.0884084 | -2.2336 | 7.38E-31   |
| AT3G01650 | 33.30553972 | 156.7637769 | -2.2348 | 1.62E-16   |
| AT1G29400 | 84.00397241 | 396.7641232 | -2.2398 | 2.07E-41   |
| AT5G67340 | 10.31546577 | 49.01813829 | -2.2485 | 1.44E-05   |
| AT5G23350 | 26.87572025 | 127.871355  | -2.2503 | 1.15E-13   |
| AT2G43500 | 5.13460404  | 24.46193632 | -2.2522 | 0.0041688  |
| AT5G44260 | 5.180861734 | 24.69760045 | -2.2531 | 0.0039449  |
| AT4G20070 | 35.10958979 | 167.4157954 | -2.2535 | 8.28E-18   |
| AT3G47420 | 43.38971702 | 207.5729625 | -2.2582 | 4.65E-22   |

|           |             |             |         |           |
|-----------|-------------|-------------|---------|-----------|
| AT2G35390 | 17.53166605 | 83.99069465 | -2.2603 | 3.40E-09  |
| AT3G04320 | 13.59976205 | 65.32609584 | -2.2641 | 2.72E-07  |
| AT5G22290 | 14.15485438 | 68.0597997  | -2.2655 | 1.41E-07  |
| AT5G06720 | 5.273377122 | 25.35746    | -2.2656 | 0.0032225 |
| AT2G41190 | 8.927734953 | 43.03226948 | -2.2691 | 5.12E-05  |
| AT5G63790 | 163.9372677 | 791.1716051 | -2.2708 | 5.62E-84  |
| AT5G38200 | 15.26503904 | 73.71573873 | -2.2717 | 3.47E-08  |
| AT1G01470 | 212.1377849 | 1024.761887 | -2.2722 | 7.77E-109 |
| AT1G72330 | 10.40798116 | 50.29072457 | -2.2726 | 9.02E-06  |
| AT2G29500 | 9.760373446 | 47.1799581  | -2.2732 | 1.87E-05  |
| AT1G16850 | 5.689696369 | 27.66696844 | -2.2817 | 0.0017801 |
| AT1G58180 | 43.01965547 | 210.5894633 | -2.2914 | 8.07E-23  |
| AT4G03960 | 11.33313504 | 55.569601   | -2.2937 | 2.17E-06  |
| AT1G60730 | 51.53107118 | 252.9147404 | -2.2951 | 2.17E-27  |
| AT2G42270 | 61.75402157 | 303.2525978 | -2.2959 | 8.81E-33  |
| AT1G14540 | 16.51399678 | 81.39838925 | -2.3013 | 3.90E-09  |

|           |             |             |         |            |
|-----------|-------------|-------------|---------|------------|
| AT5G15870 | 31.59400504 | 156.0096517 | -2.3039 | 4.07E-17   |
| AT3G12580 | 275.2332796 | 1359.970541 | -2.3048 | 3.51E-147  |
| AT1G19530 | 148.4871979 | 733.7638239 | -2.305  | 1.74E-79   |
| AT3G26910 | 30.85388194 | 152.7574867 | -2.3077 | 8.31E-17   |
| AT5G04040 | 54.90788284 | 272.2863316 | -2.31   | 1.01E-29   |
| AT5G28630 | 48.47806337 | 241.2729326 | -2.3153 | 1.92E-26   |
| AT5G28050 | 179.2485645 | 897.3147276 | -2.3237 | 3.07E-98   |
| AT5G02160 | 7.493746437 | 37.51772892 | -2.3238 | 0.00013951 |
| AT3G13520 | 104.1260693 | 522.7501652 | -2.3278 | 2.07E-57   |
| AT2G32120 | 7.678777213 | 38.6017839  | -2.3297 | 0.00010421 |
| AT4G39230 | 14.66368902 | 73.71573873 | -2.3297 | 1.88E-08   |
| AT3G13080 | 50.05082497 | 252.4434122 | -2.3345 | 5.75E-28   |
| AT3G27650 | 4.764542488 | 24.03774089 | -2.3349 | 0.0034697  |
| AT1G60750 | 11.7031966  | 59.15169572 | -2.3375 | 6.33E-07   |
| AT3G53650 | 7.493746437 | 38.03619    | -2.3436 | 0.00011111 |
| AT5G45350 | 50.83720577 | 258.8534764 | -2.3482 | 6.89E-29   |



|           |             |             |         |           |
|-----------|-------------|-------------|---------|-----------|
| AT5G02970 | 29.28112034 | 149.2696577 | -2.3499 | 7.99E-17  |
| AT5G42900 | 10.31546577 | 52.60023301 | -2.3503 | 2.91E-06  |
| AT3G54150 | 11.88822737 | 60.80134461 | -2.3546 | 3.64E-07  |
| AT4G38940 | 16.19019292 | 82.85950684 | -2.3555 | 1.44E-09  |
| AT3G16330 | 8.187611848 | 42.56094123 | -2.378  | 2.98E-05  |
| AT1G33600 | 7.308715661 | 38.08332282 | -2.3815 | 9.00E-05  |
| AT1G61360 | 32.33412815 | 168.6412488 | -2.3828 | 2.60E-19  |
| AT2G38400 | 96.81735366 | 505.9237465 | -2.3856 | 2.12E-57  |
| AT4G19870 | 5.088346346 | 26.63004628 | -2.3878 | 0.0015316 |
| AT5G66700 | 6.984911802 | 36.66933807 | -2.3923 | 0.0001213 |
| AT3G47040 | 4.255707853 | 22.43522483 | -2.3983 | 0.0042235 |
| AT5G01810 | 157.5999636 | 832.6013585 | -2.4014 | 3.18E-95  |
| AT3G19970 | 19.19694303 | 102.0896996 | -2.4109 | 5.05E-12  |
| AT2G30140 | 11.51816582 | 61.31980569 | -2.4124 | 1.95E-07  |
| AT3G23920 | 75.53881439 | 402.3257966 | -2.4131 | 2.31E-46  |
| AT5G02230 | 41.49315157 | 221.6656773 | -2.4174 | 9.70E-26  |

|           |             |             |         |            |
|-----------|-------------|-------------|---------|------------|
| AT2G17880 | 11.79571198 | 63.06372022 | -2.4185 | 1.19E-07   |
| AT5G50450 | 4.949573264 | 26.53578063 | -2.4226 | 0.0013849  |
| AT1G30040 | 5.504665593 | 29.74081275 | -2.4337 | 0.00058695 |
| AT2G20500 | 5.273377122 | 28.70389059 | -2.4444 | 0.00073254 |
| AT3G45300 | 117.8646045 | 641.9962131 | -2.4454 | 3.53E-75   |
| AT5G54080 | 40.42922461 | 220.2988253 | -2.446  | 5.80E-26   |
| AT1G77000 | 12.21203123 | 66.55154929 | -2.4462 | 3.72E-08   |
| AT5G51260 | 4.857057876 | 26.72431193 | -2.46   | 0.0011534  |
| AT3G18950 | 4.90331557  | 27.05424171 | -2.464  | 0.0010427  |
| AT2G47550 | 24.74786632 | 136.8265918 | -2.467  | 1.92E-16   |
| AT5G18630 | 35.57216673 | 197.4865379 | -2.4729 | 1.22E-23   |
| AT5G25250 | 13.27595819 | 73.71573873 | -2.4732 | 4.24E-09   |
| AT1G55510 | 29.74369728 | 165.6718809 | -2.4777 | 6.11E-20   |
| AT3G60450 | 58.97855992 | 329.5055815 | -2.482  | 2.03E-39   |
| AT1G70670 | 36.03474367 | 202.1526876 | -2.488  | 2.24E-24   |
| AT5G65110 | 93.20925352 | 523.881353  | -2.4907 | 7.76E-63   |

|           |             |             |         |            |
|-----------|-------------|-------------|---------|------------|
| AT1G80380 | 290.5908341 | 1634.849178 | -2.4921 | 5.95E-196  |
| AT3G50980 | 5.458407899 | 30.77773491 | -2.4953 | 0.00034643 |
| AT5G15120 | 4.995830958 | 28.18542952 | -2.4962 | 0.00068784 |
| AT1G11210 | 22.75878548 | 129.0968084 | -2.504  | 7.96E-16   |
| AT1G72900 | 30.94639732 | 175.6640398 | -2.505  | 2.08E-21   |
| AT5G61560 | 5.180861734 | 29.4580158  | -2.5074 | 0.00046865 |
| AT1G68290 | 3.978161689 | 22.62375613 | -2.5077 | 0.002878   |
| AT1G13480 | 9.020250341 | 51.56331085 | -2.5151 | 1.16E-06   |
| AT3G13650 | 20.39964308 | 116.6537426 | -2.5156 | 2.01E-14   |
| AT1G65390 | 4.440738629 | 25.45172565 | -2.5189 | 0.001311   |
| AT4G18950 | 118.0033775 | 679.8910046 | -2.5265 | 5.48E-83   |
| AT3G51890 | 24.79412401 | 143.2837888 | -2.5308 | 9.41E-18   |
| AT4G18510 | 11.28687735 | 65.37322866 | -2.5341 | 2.31E-08   |
| AT3G03990 | 74.33611435 | 431.07682   | -2.5358 | 6.75E-53   |
| AT2G38820 | 13.2297005  | 76.77937238 | -2.5369 | 9.59E-10   |
| AT1G12950 | 18.73436609 | 108.971092  | -2.5402 | 1.18E-13   |

|           |             |             |         |          |
|-----------|-------------|-------------|---------|----------|
| AT1G13990 | 17.71669682 | 103.1266217 | -2.5412 | 5.91E-13 |
| AT5G38940 | 13.92356591 | 81.16272513 | -2.5433 | 2.66E-10 |
| AT5G02810 | 18.08675838 | 105.4361301 | -2.5434 | 3.01E-13 |
| AT1G03905 | 17.62418144 | 102.9852232 | -2.5468 | 5.68E-13 |
| AT2G38250 | 10.50049655 | 61.41407134 | -2.5481 | 6.07E-08 |
| AT4G23550 | 11.24061966 | 65.79742409 | -2.5493 | 1.79E-08 |
| AT1G71695 | 15.08000826 | 88.27978175 | -2.5494 | 3.39E-11 |
| AT1G20630 | 30.66885116 | 179.8117284 | -2.5516 | 2.06E-22 |
| AT2G17280 | 12.85963895 | 75.45965327 | -2.5529 | 1.18E-09 |
| AT4G19720 | 8.233869542 | 48.40541156 | -2.5555 | 2.11E-06 |
| AT2G22880 | 30.94639732 | 182.074104  | -2.5567 | 9.47E-23 |
| AT1G76600 | 54.4453059  | 322.624189  | -2.567  | 2.96E-40 |
| AT3G02550 | 14.38614285 | 85.49894505 | -2.5712 | 5.71E-11 |
| AT1G04310 | 15.35755443 | 91.43768104 | -2.5738 | 1.02E-11 |
| AT1G74360 | 13.50724666 | 80.50286557 | -2.5753 | 2.25E-10 |
| AT5G02320 | 7.447488743 | 44.39912141 | -2.5757 | 5.67E-06 |

|           |             |             |         |            |
|-----------|-------------|-------------|---------|------------|
| AT4G05320 | 1031.824124 | 6167.094523 | -2.5794 | 0          |
| AT5G02580 | 6.707365638 | 40.25143279 | -2.5852 | 1.71E-05   |
| AT5G08790 | 159.7278176 | 961.9809639 | -2.5904 | 4.33E-121  |
| AT1G79360 | 3.931903995 | 23.80207677 | -2.5978 | 0.0015846  |
| AT1G05060 | 7.632519519 | 46.28443442 | -2.6003 | 2.86E-06   |
| AT1G27760 | 114.9503697 | 698.3670721 | -2.603  | 1.87E-88   |
| AT5G40780 | 34.60075515 | 210.7308618 | -2.6065 | 6.83E-27   |
| AT1G28190 | 9.667858058 | 58.9160316  | -2.6074 | 7.58E-08   |
| AT1G61820 | 110.3246003 | 672.8682137 | -2.6086 | 1.93E-85   |
| AT5G16370 | 114.7190813 | 700.5351821 | -2.6104 | 4.90E-89   |
| AT3G13450 | 26.78320486 | 164.3521617 | -2.6174 | 3.70E-21   |
| AT1G28760 | 6.661107944 | 41.47688624 | -2.6385 | 9.06E-06   |
| AT4G37030 | 4.6720271   | 29.12808602 | -2.6403 | 0.00030574 |
| AT2G02230 | 25.02541248 | 156.3395814 | -2.6432 | 2.22E-20   |
| AT3G44860 | 3.376811666 | 21.11550572 | -2.6446 | 0.0029318  |
| AT3G08970 | 4.255707853 | 26.77144476 | -2.6532 | 0.00057479 |

|           |             |             |         |           |
|-----------|-------------|-------------|---------|-----------|
| AT3G05390 | 6.152273309 | 38.74318238 | -2.6548 | 1.82E-05  |
| AT4G15530 | 53.38137894 | 338.6022168 | -2.6652 | 3.29E-44  |
| AT1G76700 | 35.75719751 | 226.9916865 | -2.6663 | 9.60E-30  |
| AT1G25400 | 150.0137018 | 956.9377516 | -2.6733 | 3.74E-125 |
| AT4G12120 | 11.42565043 | 73.29154331 | -2.6814 | 6.06E-10  |
| AT3G55940 | 8.372642624 | 53.87281929 | -2.6858 | 1.81E-07  |
| AT1G67070 | 6.892396414 | 44.35198859 | -2.6859 | 3.00E-06  |
| AT3G03110 | 19.89080844 | 129.4267382 | -2.702  | 2.22E-17  |
| AT3G29240 | 46.76652869 | 305.2793093 | -2.7066 | 1.29E-40  |
| AT1G68410 | 74.24359896 | 487.6362103 | -2.7155 | 5.04E-65  |
| AT3G19930 | 93.48679969 | 614.6120416 | -2.7168 | 5.70E-82  |
| AT5G54710 | 3.053007808 | 20.07858357 | -2.7174 | 0.0032555 |
| AT5G63130 | 8.048838766 | 53.02442844 | -2.7198 | 1.84E-07  |
| AT1G54100 | 221.7593853 | 1462.107373 | -2.721  | 3.68E-195 |
| AT2G23120 | 347.5803131 | 2295.321458 | -2.7233 | 0         |
| AT1G17300 | 7.956323378 | 52.55310018 | -2.7236 | 2.06E-07  |

|           |             |             |         |            |
|-----------|-------------|-------------|---------|------------|
| AT5G16970 | 21.27853927 | 140.6443506 | -2.7246 | 4.83E-19   |
| AT5G50720 | 7.910065684 | 52.60023301 | -2.7333 | 1.91E-07   |
| AT4G03510 | 27.75461643 | 184.7135423 | -2.7345 | 5.46E-25   |
| AT5G52760 | 3.746873219 | 25.02753022 | -2.7398 | 0.00071483 |
| AT1G53920 | 7.123684885 | 47.65128636 | -2.7418 | 7.96E-07   |
| AT5G51830 | 42.14075929 | 283.0797486 | -2.7479 | 2.35E-38   |
| AT1G67480 | 217.272389  | 1462.39017  | -2.7508 | 1.13E-197  |
| AT4G15130 | 10.63926963 | 72.44315245 | -2.7675 | 3.46E-10   |
| AT1G80920 | 161.7168984 | 1107.338597 | -2.7756 | 2.83E-151  |
| AT4G30430 | 3.238038584 | 22.19956071 | -2.7773 | 0.0014868  |
| AT1G30755 | 23.54516627 | 161.4770594 | -2.7778 | 2.71E-22   |
| AT4G02520 | 164.2148139 | 1126.663055 | -2.7784 | 4.31E-154  |
| AT5G27760 | 47.22910563 | 329.7883785 | -2.8038 | 1.09E-45   |
| AT3G17770 | 50.92972116 | 357.7381439 | -2.8123 | 1.03E-49   |
| AT1G68390 | 3.376811666 | 23.75494394 | -2.8145 | 0.00083439 |
| AT1G15010 | 32.98173586 | 232.8361569 | -2.8196 | 1.56E-32   |

|           |             |             |         |           |
|-----------|-------------|-------------|---------|-----------|
| AT3G06500 | 75.72384517 | 535.0046997 | -2.8207 | 1.57E-74  |
| AT3G13430 | 27.61584335 | 195.5069593 | -2.8237 | 2.03E-27  |
| AT2G45170 | 48.75560954 | 347.3217895 | -2.8326 | 1.15E-48  |
| AT1G64660 | 160.9767753 | 1150.417999 | -2.8372 | 3.83E-161 |
| AT1G09460 | 32.33412815 | 231.8935004 | -2.8423 | 1.07E-32  |
| AT1G03090 | 101.7206692 | 729.8989323 | -2.8431 | 1.43E-102 |
| AT2G47190 | 2.914234726 | 20.92697442 | -2.8442 | 0.0018287 |
| AT5G57660 | 7.540004131 | 54.15561624 | -2.8445 | 5.56E-08  |
| AT5G64510 | 2.821719337 | 20.45564617 | -2.8579 | 0.0020413 |
| AT3G59480 | 4.949573264 | 35.96234569 | -2.8611 | 1.59E-05  |
| AT1G23060 | 2.636688561 | 19.23019271 | -2.8666 | 0.002924  |
| AT5G04250 | 8.696446483 | 63.53504847 | -2.8691 | 2.34E-09  |
| AT3G12920 | 31.03891271 | 227.0859522 | -2.8711 | 2.16E-32  |
| AT5G62350 | 98.29759987 | 719.1997809 | -2.8712 | 3.40E-102 |
| AT5G03545 | 122.8141777 | 903.7719247 | -2.8795 | 8.36E-129 |
| AT3G60930 | 4.810800182 | 35.44388461 | -2.8812 | 1.71E-05  |



|           |             |             |         |            |
|-----------|-------------|-------------|---------|------------|
| AT4G01026 | 4.301965547 | 32.14458684 | -2.9015 | 4.49E-05   |
| AT1G80820 | 31.96406659 | 239.3876196 | -2.9048 | 1.42E-34   |
| AT1G19540 | 3.885646301 | 29.12808602 | -2.9062 | 0.00011515 |
| AT2G38210 | 2.590430867 | 19.46585684 | -2.9097 | 0.0024533  |
| AT1G11260 | 128.3188433 | 970.040677  | -2.9183 | 2.84E-140  |
| AT5G25450 | 4.394480935 | 33.22864182 | -2.9187 | 2.95E-05   |
| AT3G45060 | 4.163192465 | 31.53186011 | -2.921  | 5.06E-05   |
| AT5G52710 | 5.458407899 | 41.47688624 | -2.9258 | 1.99E-06   |
| AT1G14640 | 3.006750114 | 23.04795156 | -2.9384 | 0.0007306  |
| AT1G78830 | 65.22334862 | 502.6244488 | -2.946  | 1.65E-73   |
| AT1G80670 | 23.86897013 | 184.2893468 | -2.9488 | 3.96E-27   |
| AT4G38420 | 5.412150205 | 42.46667558 | -2.9721 | 1.13E-06   |
| AT2G26380 | 3.099265502 | 24.41480349 | -2.9778 | 0.0004186  |
| AT2G45760 | 2.914234726 | 23.04795156 | -2.9834 | 0.0006459  |
| AT5G64250 | 92.14532656 | 728.8148773 | -2.9836 | 5.32E-108  |
| AT1G04100 | 5.550923287 | 44.11632446 | -2.9905 | 5.94E-07   |

|           |             |             |         |           |
|-----------|-------------|-------------|---------|-----------|
| AT2G17840 | 315.1999273 | 2505.580992 | -2.9908 | 0         |
| AT3G19250 | 2.451657785 | 19.79578662 | -3.0134 | 0.0017384 |
| AT4G29190 | 9.436569587 | 76.21377847 | -3.0137 | 1.03E-11  |
| AT2G16660 | 27.89338952 | 225.3891705 | -3.0144 | 6.85E-34  |
| AT3G43190 | 8.002581072 | 65.09043171 | -3.0239 | 4.17E-10  |
| AT4G36430 | 24.51657785 | 200.5030387 | -3.0318 | 2.25E-30  |
| AT4G24380 | 36.12725906 | 296.1355412 | -3.0351 | 8.83E-45  |
| AT4G34030 | 59.07107531 | 487.6362103 | -3.0453 | 6.84E-74  |
| AT2G35980 | 13.46098897 | 113.3544448 | -3.074  | 1.42E-17  |
| AT2G34790 | 11.88822737 | 101.0056446 | -3.0868 | 9.11E-16  |
| AT2G40880 | 4.718284794 | 40.15716714 | -3.0893 | 1.39E-06  |
| AT5G08350 | 57.68334449 | 494.3762043 | -3.0994 | 2.72E-76  |
| AT5G16010 | 21.60234312 | 185.5148003 | -3.1023 | 8.37E-29  |
| AT5G15970 | 80.76593382 | 697.0944859 | -3.1095 | 6.71E-108 |
| AT5G33355 | 71.79194118 | 619.7966524 | -3.1099 | 5.79E-96  |
| AT1G07040 | 21.0472508  | 183.0638934 | -3.1206 | 1.34E-28  |

|           |             |             |         |           |
|-----------|-------------|-------------|---------|-----------|
| AT5G48180 | 114.7190813 | 998.650302  | -3.1219 | 4.38E-155 |
| AT5G20830 | 35.29462056 | 307.8244819 | -3.1246 | 5.97E-48  |
| AT1G67850 | 5.597180981 | 49.30093524 | -3.1388 | 4.54E-08  |
| AT5G48430 | 23.08258933 | 203.4724067 | -3.14   | 6.05E-32  |
| AT3G50970 | 231.4735011 | 2048.251188 | -3.1455 | 0         |
| AT4G01870 | 93.30176891 | 826.2855599 | -3.1467 | 1.94E-129 |
| AT5G57500 | 2.174111621 | 19.27732554 | -3.1484 | 0.0015316 |
| AT1G68500 | 4.995830958 | 44.49338706 | -3.1548 | 2.25E-07  |
| AT4G15610 | 172.0786219 | 1532.665212 | -3.1549 | 1.26E-240 |
| AT5G49700 | 6.291046392 | 56.04092926 | -3.1551 | 3.81E-09  |
| AT2G16060 | 7.031169497 | 62.92232175 | -3.1617 | 3.18E-10  |
| AT3G15356 | 5.689696369 | 51.2805139  | -3.172  | 1.87E-08  |
| AT5G65690 | 122.7216623 | 1108.846847 | -3.1756 | 3.41E-175 |
| AT3G49160 | 6.753623332 | 61.08414156 | -3.1771 | 5.49E-10  |
| AT2G30400 | 5.088346346 | 46.56723137 | -3.194  | 8.85E-08  |
| AT4G24960 | 31.82529351 | 291.3751259 | -3.1946 | 2.01E-46  |

|           |             |             |         |            |
|-----------|-------------|-------------|---------|------------|
| AT1G30760 | 17.30037758 | 161.0999968 | -3.2191 | 5.47E-26   |
| AT2G29460 | 4.949573264 | 46.6143642  | -3.2354 | 7.03E-08   |
| AT1G49570 | 5.227119428 | 49.48946654 | -3.243  | 2.40E-08   |
| AT4G02890 | 124.9882893 | 1190.198104 | -3.2513 | 1.67E-192  |
| AT3G02800 | 11.98074276 | 114.8155624 | -3.2605 | 7.30E-19   |
| AT1G22400 | 12.25828892 | 117.6435319 | -3.2626 | 2.48E-19   |
| AT4G18280 | 31.96406659 | 306.7875597 | -3.2627 | 6.85E-50   |
| AT2G31945 | 4.440738629 | 42.65520688 | -3.2639 | 2.56E-07   |
| AT5G06730 | 3.885646301 | 37.37633045 | -3.2659 | 1.74E-06   |
| AT1G21400 | 45.05499401 | 437.2040873 | -3.2785 | 2.23E-71   |
| AT3G14770 | 22.52749701 | 219.2147704 | -3.2826 | 6.27E-36   |
| AT4G36880 | 2.035338538 | 19.93718509 | -3.2921 | 0.00089755 |
| AT1G14890 | 15.03375057 | 149.175392  | -3.3107 | 9.53E-25   |
| AT1G05340 | 33.53682819 | 335.5385832 | -3.3227 | 1.65E-55   |
| AT5G39720 | 2.497915479 | 25.02753022 | -3.3247 | 0.00013037 |
| AT5G13210 | 11.00933119 | 110.9978035 | -3.3337 | 1.24E-18   |

|           |             |             |         |           |
|-----------|-------------|-------------|---------|-----------|
| AT2G32020 | 14.84871979 | 149.8352516 | -3.335  | 5.03E-25  |
| AT4G24230 | 88.67599951 | 903.3005965 | -3.3486 | 2.77E-150 |
| AT2G30395 | 2.867977031 | 29.22235167 | -3.349  | 2.59E-05  |
| AT5G52300 | 1.572761598 | 16.16655907 | -3.3616 | 0.0030877 |
| AT1G32970 | 1.757792374 | 18.09900491 | -3.3641 | 0.0015202 |
| AT5G10625 | 23.26762011 | 240.3302761 | -3.3686 | 2.48E-40  |
| AT3G06850 | 112.8687735 | 1172.146232 | -3.3764 | 1.74E-196 |
| AT5G42830 | 5.458407899 | 56.70078881 | -3.3768 | 7.70E-10  |
| AT3G11020 | 3.376811666 | 35.11395483 | -3.3783 | 2.61E-06  |
| AT2G03760 | 11.51816582 | 119.8116419 | -3.3788 | 2.49E-20  |
| AT1G23550 | 2.96049242  | 30.82486773 | -3.3802 | 1.30E-05  |
| AT1G07150 | 11.14810427 | 116.6066097 | -3.3868 | 7.70E-20  |
| AT1G75860 | 27.15326641 | 284.3523349 | -3.3885 | 6.21E-48  |
| AT4G33070 | 10.130435   | 106.1902554 | -3.3899 | 4.11E-18  |
| AT2G05580 | 3.006750114 | 31.53186011 | -3.3905 | 9.67E-06  |
| AT3G23550 | 2.821719337 | 29.6465471  | -3.3932 | 1.93E-05  |

|           |             |             |         |            |
|-----------|-------------|-------------|---------|------------|
| AT4G28290 | 2.914234726 | 30.77773491 | -3.4007 | 1.24E-05   |
| AT3G15500 | 14.61743132 | 154.9255967 | -3.4058 | 2.29E-26   |
| AT4G35480 | 15.5888429  | 165.2948182 | -3.4065 | 4.01E-28   |
| AT3G08860 | 15.5888429  | 165.624748  | -3.4093 | 3.38E-28   |
| AT5G20150 | 63.37304086 | 674.2821984 | -3.4114 | 3.43E-114  |
| AT4G17090 | 8.973992647 | 96.29236204 | -3.4236 | 1.32E-16   |
| AT5G41610 | 4.255707853 | 46.14303595 | -3.4386 | 3.13E-08   |
| AT3G19240 | 156.8598405 | 1704.322962 | -3.4417 | 6.52E-291  |
| AT1G15040 | 124.3406816 | 1361.573057 | -3.4529 | 5.23E-233  |
| AT5G40880 | 9.482827282 | 104.5406065 | -3.4626 | 3.55E-18   |
| AT1G21790 | 4.810800182 | 53.40149104 | -3.4725 | 1.59E-09   |
| AT5G28145 | 2.867977031 | 31.86178989 | -3.4737 | 6.51E-06   |
| AT5G13080 | 16.60651217 | 184.6192766 | -3.4747 | 6.27E-32   |
| AT1G06570 | 34.46198207 | 383.1427367 | -3.4748 | 4.96E-66   |
| AT5G28646 | 2.174111621 | 24.36767067 | -3.4865 | 0.00011156 |
| AT3G06490 | 3.885646301 | 43.92779316 | -3.4989 | 5.58E-08   |

|           |             |             |         |            |
|-----------|-------------|-------------|---------|------------|
| AT3G48450 | 16.00516214 | 181.0371819 | -3.4997 | 1.64E-31   |
| AT2G18700 | 65.13083323 | 740.9280134 | -3.5079 | 1.18E-128  |
| AT1G74010 | 5.458407899 | 62.21532937 | -3.5107 | 4.08E-11   |
| AT1G14260 | 2.220369315 | 25.35746    | -3.5135 | 7.17E-05   |
| AT3G09350 | 27.89338952 | 319.7019539 | -3.5187 | 1.01E-55   |
| AT1G26380 | 1.989080844 | 22.81228743 | -3.5196 | 0.00018779 |
| AT5G04120 | 1.572761598 | 18.05187208 | -3.5208 | 0.0011722  |
| AT4G36410 | 9.945404222 | 114.5798983 | -3.5262 | 3.32E-20   |
| AT5G40010 | 2.867977031 | 33.22864182 | -3.5343 | 3.17E-06   |
| AT3G22120 | 1.71153468  | 19.84291944 | -3.5353 | 0.00057479 |
| AT1G66050 | 1.433988516 | 16.68502015 | -3.5404 | 0.0019125  |
| AT1G10070 | 52.36370967 | 612.5853301 | -3.5483 | 1.88E-107  |
| AT4G28085 | 15.03375057 | 176.418165  | -3.5527 | 4.07E-31   |
| AT2G46240 | 18.22553146 | 214.1244252 | -3.5544 | 1.00E-37   |
| AT3G20670 | 20.53841616 | 245.5148869 | -3.5794 | 1.78E-43   |
| AT5G39610 | 5.828469451 | 69.94511271 | -3.585  | 1.16E-12   |

|           |             |             |         |           |
|-----------|-------------|-------------|---------|-----------|
| AT3G01970 | 7.447488743 | 89.8822978  | -3.5932 | 3.49E-16  |
| AT2G47950 | 1.989080844 | 24.08487372 | -3.598  | 9.65E-05  |
| AT3G26740 | 6.059757921 | 73.81000439 | -3.6065 | 2.13E-13  |
| AT5G64530 | 2.682946255 | 32.85157922 | -3.6141 | 2.86E-06  |
| AT3G09405 | 3.238038584 | 39.92150301 | -3.624  | 1.65E-07  |
| AT3G16150 | 33.53682819 | 417.1255037 | -3.6367 | 1.00E-74  |
| AT1G76410 | 9.57534267  | 121.131361  | -3.6611 | 5.14E-22  |
| AT2G43120 | 62.49414467 | 802.3420847 | -3.6824 | 4.41E-145 |
| AT4G27310 | 1.387730822 | 17.81620796 | -3.6824 | 0.0009857 |
| AT5G61390 | 3.238038584 | 41.99534732 | -3.697  | 5.44E-08  |
| AT5G55090 | 1.94282315  | 25.35746    | -3.7062 | 4.57E-05  |
| AT5G67080 | 3.053007808 | 39.92150301 | -3.7089 | 1.22E-07  |
| AT2G04040 | 2.821719337 | 36.90500219 | -3.7092 | 4.13E-07  |
| AT1G43670 | 29.14234726 | 381.9644161 | -3.7122 | 1.31E-69  |
| AT1G19250 | 1.48024621  | 19.46585684 | -3.717  | 0.000481  |
| AT5G57510 | 6.38356178  | 84.22635877 | -3.7218 | 1.27E-15  |



|           |             |             |         |            |
|-----------|-------------|-------------|---------|------------|
| AT3G19390 | 166.5739563 | 2252.383454 | -3.7572 | 0          |
| AT3G05630 | 3.700615525 | 50.24359175 | -3.7631 | 1.39E-09   |
| AT5G43450 | 2.266627009 | 30.87200056 | -3.7677 | 4.14E-06   |
| AT1G67980 | 6.984911802 | 95.58536966 | -3.7745 | 7.22E-18   |
| AT5G57220 | 9.57534267  | 131.8776451 | -3.7837 | 1.46E-24   |
| AT3G17110 | 29.88247036 | 415.0516594 | -3.7959 | 5.98E-77   |
| AT5G45630 | 2.729203949 | 37.94192435 | -3.7972 | 2.03E-07   |
| AT2G24850 | 2.035338538 | 28.32682799 | -3.7988 | 1.10E-05   |
| AT3G29670 | 1.387730822 | 19.51298967 | -3.8136 | 0.00040085 |
| AT1G10160 | 9.344054199 | 132.3961062 | -3.8247 | 7.39E-25   |
| AT5G48570 | 14.29362746 | 204.3679304 | -3.8377 | 2.63E-38   |
| AT5G52050 | 50.51340191 | 723.7245321 | -3.8407 | 2.70E-135  |
| AT3G02040 | 29.88247036 | 429.4743039 | -3.8452 | 2.05E-80   |
| AT1G74310 | 50.37462883 | 725.4684467 | -3.8481 | 8.41E-136  |
| AT5G65600 | 1.24895774  | 18.38180186 | -3.8795 | 0.00058182 |
| AT4G36010 | 13.73853513 | 203.6138052 | -3.8895 | 1.53E-38   |

|           |             |             |         |            |
|-----------|-------------|-------------|---------|------------|
| AT5G54165 | 1.341473128 | 20.17284922 | -3.9105 | 0.00026142 |
| AT4G22710 | 27.10700872 | 409.3957204 | -3.9168 | 1.06E-77   |
| AT5G07010 | 15.40381212 | 233.5431493 | -3.9223 | 1.91E-44   |
| AT1G43160 | 35.38713595 | 536.7486143 | -3.9229 | 5.63E-102  |
| AT5G14470 | 6.059757921 | 92.23893907 | -3.928  | 9.06E-18   |
| AT4G36820 | 2.174111621 | 33.13437617 | -3.9298 | 1.04E-06   |
| AT2G43510 | 1.896565456 | 28.93955472 | -3.9316 | 6.25E-06   |
| AT5G40000 | 6.753623332 | 103.7864813 | -3.9418 | 5.30E-20   |
| AT1G77380 | 10.130435   | 156.999441  | -3.954  | 3.84E-30   |
| AT1G05560 | 1.063926963 | 16.54362167 | -3.9588 | 0.0011243  |
| AT4G24040 | 2.312884703 | 36.10374416 | -3.9644 | 2.68E-07   |
| AT2G18193 | 15.68135829 | 247.6829968 | -3.9814 | 1.28E-47   |
| AT5G52640 | 54.21401743 | 866.207063  | -3.998  | 1.35E-166  |
| AT1G59860 | 2.220369315 | 35.63241591 | -4.0043 | 2.94E-07   |
| AT4G22690 | 29.92872805 | 484.6668423 | -4.0174 | 1.17E-93   |
| AT1G56060 | 1.063926963 | 17.39201253 | -4.031  | 0.00071729 |

|           |             |             |         |            |
|-----------|-------------|-------------|---------|------------|
| AT2G41100 | 158.4788598 | 2596.31168  | −4.0341 | 0          |
| AT2G34390 | 1.989080844 | 32.61591509 | −4.0354 | 1.00E−06   |
| AT4G20730 | 3.284296278 | 54.01421777 | −4.0397 | 8.72E−11   |
| AT2G32210 | 4.579511712 | 76.02524717 | −4.0532 | 4.88E−15   |
| AT3G03660 | 1.619019292 | 27.00710888 | −4.0601 | 1.09E−05   |
| AT1G08050 | 11.33313504 | 189.6153561 | −4.0645 | 4.93E−37   |
| AT1G08090 | 3.053007808 | 51.6575765  | −4.0807 | 2.12E−10   |
| AT5G38430 | 1.24895774  | 21.20977138 | −4.0859 | 0.00012877 |
| AT1G22985 | 6.152273309 | 105.7189271 | −4.103  | 6.39E−21   |
| AT2G24130 | 4.718284794 | 81.58692056 | −4.112  | 2.97E−16   |
| AT1G54050 | 2.544173173 | 44.21059011 | −4.1191 | 4.94E−09   |
| AT1G08630 | 13.46098897 | 234.0144775 | −4.1197 | 4.72E−46   |
| AT4G28350 | 4.440738629 | 77.39209911 | −4.1233 | 1.82E−15   |
| AT5G38410 | 3.700615525 | 64.94903323 | −4.1335 | 4.57E−13   |
| AT4G35770 | 42.0019862  | 743.2375218 | −4.1453 | 1.69E−146  |
| AT4G16690 | 0           | 14.84683996 | −4.1563 | 0.0018603  |

|           |             |             |         |           |
|-----------|-------------|-------------|---------|-----------|
| AT1G63180 | 19.19694303 | 349.3013681 | −4.1855 | 2.29E−69  |
| AT5G66400 | 0           | 15.22390256 | −4.1925 | 0.0015247 |
| AT5G49620 | 2.544173173 | 46.52009855 | −4.1926 | 1.42E−09  |
| AT1G69680 | 9.390311893 | 174.1557894 | −4.2131 | 8.02E−35  |
| AT4G33666 | 2.405400091 | 44.72905119 | −4.2169 | 2.93E−09  |
| AT1G72800 | 4.255707853 | 82.10538163 | −4.27   | 9.76E−17  |
| AT5G20790 | 1.94282315  | 37.61199457 | −4.275  | 6.24E−08  |
| AT1G70130 | 1.989080844 | 39.02597933 | −4.2943 | 3.17E−08  |
| AT1G15330 | 6.291046392 | 124.4306587 | −4.3059 | 2.68E−25  |
| AT4G01360 | 17.34663527 | 345.3422108 | −4.3153 | 7.47E−70  |
| AT1G47510 | 1.341473128 | 26.91284323 | −4.3264 | 7.08E−06  |
| AT3G46080 | 3.238038584 | 65.18469736 | −4.3313 | 1.78E−13  |
| AT5G24600 | 2.174111621 | 43.88066033 | −4.3351 | 3.10E−09  |
| AT2G38823 | 0           | 13.15005825 | −4.3438 | 0.0033196 |
| AT3G16530 | 6.799881026 | 141.3042102 | −4.3772 | 5.94E−29  |
| AT1G02920 | 26.69068947 | 560.3150269 | −4.3918 | 2.24E−114 |

|           |             |             |         |            |
|-----------|-------------|-------------|---------|------------|
| AT2G32190 | 8.141354154 | 171.5163512 | −4.3969 | 3.69E−35   |
| AT3G22740 | 3.793130913 | 79.93727167 | −4.3974 | 1.42E−16   |
| AT2G22860 | 37.51498988 | 797.5345365 | −4.41   | 4.78E−163  |
| AT2G44578 | 2.867977031 | 61.13127439 | −4.4138 | 8.49E−13   |
| AT2G01340 | 3.700615525 | 79.46594342 | −4.4245 | 1.55E−16   |
| AT2G18550 | 1.295215434 | 27.85549974 | −4.4267 | 3.92E−06   |
| AT3G03670 | 1.48024621  | 32.00318836 | −4.4343 | 5.75E−07   |
| AT1G21120 | 15.49632751 | 335.9156458 | −4.4381 | 4.99E−69   |
| AT4G35180 | 1.665276986 | 36.10374416 | −4.4383 | 8.71E−08   |
| AT5G06980 | 1.572761598 | 35.53815026 | −4.498  | 1.01E−07   |
| AT5G46330 | 0           | 17.95760643 | −4.5132 | 0.00032877 |
| AT4G18170 | 1.665276986 | 39.49730758 | −4.5679 | 1.38E−08   |
| AT5G20230 | 47.41413641 | 1125.861797 | −4.5696 | 1.84E−234  |
| AT1G63040 | 1.48024621  | 35.49101743 | −4.5835 | 8.81E−08   |
| AT1G05680 | 7.308715661 | 176.6538291 | −4.5952 | 4.93E−37   |
| AT3G60140 | 25.62676251 | 620.7864417 | −4.5984 | 9.62E−130  |

|           |             |             |         |            |
|-----------|-------------|-------------|---------|------------|
| AT2G17660 | 6.013500227 | 145.9232271 | −4.6009 | 1.17E−30   |
| AT5G14740 | 0           | 20.31424769 | −4.6087 | 0.00010152 |
| AT1G10170 | 66.42604866 | 1628.533379 | −4.6157 | 0          |
| AT1G26240 | 2.266627009 | 55.61673383 | −4.6169 | 6.08E−12   |
| AT3G12510 | 3.42306936  | 84.8390855  | −4.6314 | 5.01E−18   |
| AT5G59080 | 4.163192465 | 103.315153  | −4.6332 | 7.04E−22   |
| AT5G02020 | 5.550923287 | 137.8635139 | −4.6344 | 4.41E−29   |
| AT1G74000 | 1.850307762 | 46.33156725 | −4.6462 | 4.69E−10   |
| AT5G43370 | 0           | 19.93718509 | −4.6641 | 0.00011487 |
| AT5G43360 | 0           | 13.4328552  | −4.7477 | 0.0022365  |
| AT4G34380 | 1.804050068 | 48.64107569 | −4.7529 | 1.24E−10   |
| AT1G01480 | 1.341473128 | 36.24514264 | −4.7559 | 4.66E−08   |
| AT3G47380 | 2.220369315 | 60.56568048 | −4.7696 | 3.78E−13   |
| AT3G46090 | 1.295215434 | 36.99926784 | −4.8362 | 2.90E−08   |
| AT5G52670 | 0           | 27.05424171 | −4.87   | 3.25E−06   |
| AT5G39580 | 28.44848184 | 837.3146411 | −4.8793 | 2.40E−179  |

|            |             |             |         |           |
|------------|-------------|-------------|---------|-----------|
| AT1G71520  | 1.48024621  | 44.16345729 | −4.8989 | 8.24E−10  |
| AT5G52310  | 39.18026687 | 1179.734617 | −4.9122 | 2.15E−253 |
| AT1G56250  | 3.469327054 | 107.2271775 | −4.9499 | 2.64E−23  |
| AT4G16680  | 8.09509646  | 253.8573969 | −4.9708 | 7.55E−55  |
| AT5G01380  | 5.597180981 | 175.8997039 | −4.9739 | 4.35E−38  |
| AT3G14210  | 0           | 13.2443239  | −4.9915 | 0.0021693 |
| AT3G28210  | 16.23645061 | 517.1413589 | −4.9933 | 8.96E−112 |
| AT5G16980  | 0           | 11.9246048  | −5.01   | 0.0040473 |
| AT2G02990  | 0           | 19.79578662 | −5.0408 | 9.29E−05  |
| AT3G16120  | 0           | 29.97647688 | −5.092  | 6.39E−07  |
| AT3G47340  | 76.37145289 | 2625.298368 | −5.1033 | 0         |
| AT5G62360  | 3.284296278 | 113.6372417 | −5.1127 | 6.31E−25  |
| Novel00001 | 1.804050068 | 62.73379044 | −5.1199 | 6.22E−14  |
| AT4G37370  | 4.116934771 | 144.0850469 | −5.1292 | 1.52E−31  |
| AT1G16030  | 8.002581072 | 285.3892571 | −5.1563 | 2.36E−62  |
| AT2G39400  | 4.440738629 | 159.4032151 | −5.1657 | 6.19E−35  |

|           |             |             |         |           |
|-----------|-------------|-------------|---------|-----------|
| AT4G12735 | 0           | 23.75494394 | -5.197  | 1.25E-05  |
| AT3G28600 | 0           | 23.09508439 | -5.2632 | 1.66E-05  |
| AT5G52400 | 0           | 12.53733152 | -5.275  | 0.0027639 |
| AT2G10940 | 0           | 19.46585684 | -5.2829 | 9.64E-05  |
| AT2G36770 | 0           | 19.74865379 | -5.3037 | 8.35E-05  |
| AT4G37710 | 0           | 22.05816223 | -5.3124 | 2.68E-05  |
| AT1G59660 | 11.93448507 | 475.2874101 | -5.3156 | 1.50E-104 |
| AT5G38420 | 1.202700045 | 48.21688026 | -5.3252 | 6.43E-11  |
| AT1G73010 | 9.112765729 | 371.7837258 | -5.3504 | 6.44E-82  |
| AT5G26340 | 17.67043913 | 749.7889845 | -5.4071 | 2.58E-165 |
| AT1G63530 | 4.348223241 | 188.9554965 | -5.4415 | 7.72E-42  |
| AT3G60420 | 0           | 22.67088896 | -5.4775 | 1.86E-05  |
| AT5G26000 | 0           | 22.34095918 | -5.4816 | 2.18E-05  |
| AT1G73220 | 0           | 17.10921558 | -5.5309 | 0.0002811 |
| AT1G77120 | 12.81338125 | 611.548408  | -5.5767 | 1.45E-135 |
| AT1G64160 | 2.544173173 | 131.5005825 | -5.6917 | 2.22E-29  |



|           |             |             |         |            |
|-----------|-------------|-------------|---------|------------|
| AT5G39120 | 0           | 26.48864781 | -5.702  | 2.65E-06   |
| AT5G01760 | 0           | 12.44306587 | -5.7495 | 0.0026768  |
| AT2G41730 | 0           | 51.6575765  | -5.8031 | 8.63E-12   |
| AT2G40340 | 3.238038584 | 183.4880888 | -5.8244 | 6.21E-41   |
| AT1G02930 | 9.945404222 | 575.2561325 | -5.854  | 4.92E-128  |
| AT1G80160 | 4.070677077 | 240.9901356 | -5.8876 | 1.05E-53   |
| AT3G01500 | 0           | 38.83744803 | -5.9062 | 5.37E-09   |
| AT1G29395 | 0           | 27.85549974 | -5.9121 | 1.30E-06   |
| AT1G66090 | 1.341473128 | 83.66076487 | -5.9627 | 7.43E-19   |
| AT2G43620 | 0           | 41.00555799 | -5.9846 | 1.82E-09   |
| AT5G06760 | 0           | 46.94429398 | -5.987  | 9.18E-11   |
| AT2G36800 | 0           | 15.36530104 | -6.0538 | 0.00064022 |
| AT4G06746 | 2.405400091 | 161.0057311 | -6.0647 | 6.08E-36   |
| AT1G14550 | 0           | 21.77536528 | -6.0714 | 2.71E-05   |
| AT5G22300 | 1.017669269 | 69.09672186 | -6.0853 | 1.26E-15   |
| AT1G07400 | 1.94282315  | 136.4495292 | -6.1341 | 1.73E-30   |

|           |             |             |         |            |
|-----------|-------------|-------------|---------|------------|
| AT1G69490 | 6.059757921 | 429.2857726 | -6.1465 | 1.89E-95   |
| AT3G12320 | 0           | 16.4022232  | -6.1481 | 0.00038711 |
| AT5G49690 | 0           | 49.77226349 | -6.2641 | 2.39E-11   |
| AT1G69930 | 0           | 68.0597997  | -6.275  | 2.33E-15   |
| AT4G21920 | 1.110184657 | 86.63013286 | -6.286  | 1.93E-19   |
| AT2G31345 | 0           | 14.75257431 | -6.3171 | 0.00088894 |
| AT5G19890 | 3.145523196 | 254.4229909 | -6.3378 | 2.00E-56   |
| AT1G80660 | 0           | 42.7023397  | -6.4162 | 9.04E-10   |
| AT5G61890 | 0           | 17.20348123 | -6.5388 | 0.0002811  |
| AT3G02480 | 0           | 35.58528308 | -6.5874 | 3.45E-08   |
| AT2G11810 | 0           | 39.16737781 | -6.7257 | 6.43E-09   |
| AT2G02250 | 0           | 14.89397279 | -6.7459 | 0.00091905 |
| AT4G34210 | 0           | 20.07858357 | -6.7617 | 7.56E-05   |
| AT3G55970 | 0           | 36.19800981 | -6.8046 | 3.00E-08   |
| AT4G33467 | 0           | 48.59394286 | -6.8669 | 7.14E-11   |
| AT2G15780 | 0           | 28.56249212 | -6.9483 | 1.36E-06   |

|           |             |             |         |            |
|-----------|-------------|-------------|---------|------------|
| AT1G21529 | 0           | 17.39201253 | -6.9696 | 0.00030015 |
| AT3G09922 | 0           | 58.77463312 | -6.9894 | 5.63E-13   |
| AT3G05950 | 0           | 23.51927981 | -6.9899 | 1.62E-05   |
| AT3G63380 | 10.03791961 | 1293.984585 | -7.0102 | 4.85E-279  |
| AT3G60120 | 0           | 12.01887045 | -7.0214 | 0.0039499  |
| AT2G47520 | 0           | 48.45254439 | -7.0327 | 9.36E-11   |
| AT2G04050 | 0           | 50.9034513  | -7.1039 | 3.15E-11   |
| AT3G43250 | 0           | 38.27185413 | -7.1074 | 1.44E-08   |
| AT3G19615 | 0           | 39.45017476 | -7.1512 | 8.52E-09   |
| AT4G25580 | 0           | 101.7597698 | -7.2958 | 8.76E-22   |
| AT1G69920 | 0           | 134.3756849 | -7.3344 | 1.39E-28   |
| AT3G22910 | 4.024419383 | 652.3654347 | -7.3408 | 7.73E-138  |
| AT1G34047 | 0           | 150.3065798 | -7.344  | 6.56E-32   |
| AT1G17710 | 0           | 22.57662331 | -7.346  | 3.19E-05   |
| AT5G39150 | 0           | 15.36530104 | -7.3758 | 0.00095012 |
| AT1G48710 | 0           | 15.88376212 | -7.4236 | 0.00076404 |

|           |             |             |         |            |
|-----------|-------------|-------------|---------|------------|
| AT3G27690 | 0           | 96.00956509 | -7.4343 | 2.22E-20   |
| AT1G71000 | 0           | 17.48627818 | -7.5623 | 0.00039346 |
| AT5G64750 | 2.590430867 | 529.537292  | -7.6754 | 3.57E-109  |
| AT4G32950 | 0           | 152.8046196 | -7.7828 | 2.25E-31   |
| AT1G06225 | 0           | 20.83270877 | -7.8149 | 0.00010244 |
| AT1G75600 | 0           | 84.6505542  | -7.8376 | 1.85E-17   |
| AT3G19920 | 0           | 34.6897594  | -7.9656 | 2.30E-07   |
| AT2G38240 | 2.729203949 | 682.4361772 | -7.9661 | 3.43E-137  |
| AT2G36255 | 0           | 103.2208874 | -8.1238 | 1.14E-20   |
| AT4G36600 | 0           | 13.76278498 | -8.2169 | 0.0030729  |
| AT1G52890 | 0           | 16.92068427 | -8.5149 | 0.0009857  |
| AT4G33720 | 0           | 159.167551  | -8.5786 | 2.89E-30   |
| AT5G12030 | 0           | 215.0199489 | -8.5975 | 1.08E-40   |
| AT2G42560 | 0           | 92.71026732 | -8.6469 | 1.21E-17   |
| AT4G33930 | 0           | 116.7480082 | -8.7165 | 5.89E-22   |
| AT1G11925 | 0           | 27.43130431 | -9.2119 | 2.88E-05   |

|                  |          |                    |                |                 |
|------------------|----------|--------------------|----------------|-----------------|
| AT2G02010        | 0        | 537.1256769        | -9.2554        | 7.69E-94        |
| AT4G25200        | 0        | 29.69367993        | -9.3262        | 1.42E-05        |
| AT5G55150        | 0        | 37.4705961         | -9.6618        | 1.30E-06        |
| AT5G24640        | 0        | 37.6591274         | -9.6691        | 1.23E-06        |
| AT3G46230        | 0        | 682.0591146        | -10.147        | 1.96E-105       |
| AT5G12020        | 0        | 109.253889         | -10.206        | 5.54E-17        |
| <u>AT1G05675</u> | <u>0</u> | <u>79.65447472</u> | <u>-10.75</u>  | <u>1.55E-11</u> |
| <u>AT1G53540</u> | <u>0</u> | <u>257.628023</u>  | <u>-11.443</u> | <u>1.46E-32</u> |
