# Supplementary material for: Expression of Root Genes in Arabidopsis Seedlings Grown by Standard and Improved Growing Methods
Source: MDPI journal article supplement (doi:10.3390/ijms18050951), 2017-05-03
Supplement: s1 [file s1]

**Supplementary Table 5.** List of the primers for the qRT-PCR analysis on photoreceptor genes.

| Gene Name    | Gene ID   | Primer Sequences                                        |                |
|--------------|-----------|---------------------------------------------------------|----------------|
|              |           | (F/R)                                                   | Product Length |
| <i>UVR8</i>  | AT5G63860 | ATTGTTTCCGTTACCTGTGGTGCTG/<br>AATCTGCTTGATCCGAATACCGTGC | 189            |
| <i>CRY1</i>  | AT4G08920 | AAACCAAGTCACTGCTATGATTCCA/<br>TCCTCCAATACCATTTTCTTCACTA | 178            |
| <i>CRY2</i>  | AT1G04400 | GTTGTCTACTTTTGTCTCGTTGTGA/<br>TAGTGACTTGACTCTTCTTTCTTCC | 183            |
| <i>PHOT1</i> | AT3G45780 | AAGAGCCCCTCCATCTCCTTTGAAT/<br>GCGGTTCTTTCTGTAATCTTAGCGG | 201            |
| <i>PHOT2</i> | AT5G58140 | ATGCGTGTGGTATCTATGTCTATCC/<br>AGTTGACGGGTTGAATACTTCGAGA | 188            |
| <i>PHYA</i>  | AT1G09570 | TTGTATGGAGACAGTATTAGGCTTC/<br>TTAGTAAAAACTCAGGTATCCCAGC | 196            |

---

|               |           |                                                          |     |
|---------------|-----------|----------------------------------------------------------|-----|
| <i>PHYB</i>   | AT2G18790 | ATGGTTTCCGGAGTCGGGGGTAGT/<br>ATTGCTTTGCTCATTGATTCAGTGTTG | 173 |
| <i>ACTIN2</i> | AT3G18780 | AAGCTCTCCTTTGTTGCTGTT/<br>GACTTCTGGGCATCTGAATCT          | 178 |

---
