# Supplementary material for: Expression of Root Genes in Arabidopsis Seedlings Grown by Standard and Improved Growing Methods
Source: MDPI journal article supplement (doi:10.3390/ijms18050951), 2017-05-03
Supplement: s1 [file s1]

**Supplementary Table 4.** List of the primers for the qRT-PCR analysis to valid the transcriptome results.

| Gene Name      | Gene ID   | Primer Sequences                                |                |
|----------------|-----------|-------------------------------------------------|----------------|
|                |           | (F/R)                                           | Product Length |
| <i>ATFRO2</i>  | AT1G01580 | CTCATCAATCCTCGGACCA/<br>TGCGGCTATGTTGTGGAAC     | 189            |
| /              | AT1G21400 | AATGGGTGAGGCTCCGTTA/<br>GGACCTCATAAGTTGCGGTT    | 178            |
| <i>ASN1</i>    | AT3G47340 | AGAACTCTGCGAGACTAACGG/<br>TGGGTCAAGGAGTTGTGATTC | 183            |
| <i>LAX3</i>    | AT1G77690 | TGGGTCAAGGAGTTGTGATTC/<br>GGGTATTTCGTAGTTGGGTT  | 201            |
| <i>GH3.17</i>  | AT1G28130 | TACCAAGTTACGACCCAA/<br>CGTAAAGCCTTTCATTCA       | 188            |
| <i>ATCDPK2</i> | AT1G35670 | TGGACCTGAAATAGATGTG/<br>TCCAGCAGTCTTATCTCG      | 196            |

---

|               |           |                                                 |     |
|---------------|-----------|-------------------------------------------------|-----|
| <i>UBC5</i>   | AT1G63800 | TCAGTGGACCCAAAGAC/<br>TTTCTTCCGCAACTTCT         | 173 |
| <i>ARR3</i>   |           | TGCCTGGAATGACTGGA/<br>AAGAAGGTGCGGAGGAT         | 178 |
| <i>ATNPR1</i> | AT1G64280 | TTGCGGAGAAGACGACA/<br>CTCATCGTCGTCGGTGA         | 196 |
| <i>ERS2</i>   | AT1G04310 | GATTGTTAAGGTGGTGGC/<br>GATTGTTAAGGTGGTGGC       | 182 |
| <i>ACTIN2</i> | AT3G18780 | AAGCTCTCCTTTGTTGCTGTT/<br>GACTTCTGGGCATCTGAATCT | 178 |

---
