# Supplementary material for: Expression of Root Genes in Arabidopsis Seedlings Grown by Standard and Improved Growing Methods
Source: MDPI journal article supplement (doi:10.3390/ijms18050951), 2017-05-03
Supplement: s1 [file s1]

**Supplementary Table 2.** List of all 2471 DEGs from TPG/SG comparison groups.

| Gene_id   | readcount_TPG | readcount_SG | log2 Fold change<br>(TPG vs SG) | q value    |
|-----------|---------------|--------------|---------------------------------|------------|
| AT5G07990 | 488.7099391   | 0            | 9.4377                          | 5.89E-89   |
| AT5G22890 | 22.94547757   | 0            | 8.9318                          | 6.01E-05   |
| AT1G51840 | 27.74801939   | 0            | 8.206                           | 2.56E-06   |
| AT1G73120 | 44.94686572   | 0            | 7.9019                          | 3.51E-10   |
| AT1G51830 | 115.1378615   | 0            | 7.674                           | 6.68E-26   |
| AT4G31940 | 94.77836799   | 0            | 7.5665                          | 1.39E-21   |
| AT5G17040 | 57.01479131   | 0            | 7.4376                          | 2.61E-13   |
| AT3G46900 | 20.44158825   | 0            | 7.1802                          | 3.15E-05   |
| AT5G23990 | 12.88887291   | 0            | 7.0998                          | 0.0015143  |
| AT5G17220 | 19.08702517   | 0            | 7.0813                          | 5.93E-05   |
| AT5G62210 | 222.2714867   | 1.785364618  | 6.96                            | 1.49E-52   |
| AT3G56080 | 16.17266219   | 0            | 6.8422                          | 0.000241   |
| AT5G04950 | 91.28934189   | 0            | 6.8366                          | 6.10E-22   |
| AT3G44450 | 10.38498359   | 0            | 6.7881                          | 0.0049224  |
| AT4G04750 | 50.0367391    | 0            | 6.2493                          | 1.44E-12   |
| AT2G23910 | 513.5025481   | 7.517324708  | 6.094                           | 3.48E-126  |
| AT5G59520 | 65.10112241   | 0            | 6.044                           | 2.60E-16   |
| AT2G25090 | 25.69565109   | 0            | 5.9252                          | 9.00E-07   |
| AT1G08430 | 13.87400969   | 0            | 5.8841                          | 0.0006134  |
| AT4G25100 | 308.4709552   | 5.497043693  | 5.8103                          | 2.84E-76   |
| AT5G35190 | 65.18321714   | 1.174581986  | 5.7943                          | 2.13E-16   |
| AT4G03540 | 15.63904643   | 0            | 5.7938                          | 0.00023144 |

|           |             |             |        |            |
|-----------|-------------|-------------|--------|------------|
| AT4G04840 | 99.58090981 | 1.832347898 | 5.7641 | 7.94E-25   |
| AT2G25160 | 75.19877443 | 1.456481662 | 5.6901 | 7.55E-19   |
| AT4G23496 | 16.70627794 | 0           | 5.6667 | 0.00012641 |
| AT4G29740 | 16.62418321 | 0           | 5.6596 | 0.00013209 |
| AT3G56290 | 61.8583805  | 1.268548545 | 5.6077 | 1.34E-15   |
| AT3G28160 | 47.65599187 | 0           | 5.594  | 4.01E-12   |
| AT3G09220 | 236.8022542 | 4.980227619 | 5.5713 | 1.19E-58   |
| AT1G64500 | 30.53924027 | 0           | 5.5369 | 5.89E-08   |
| AT4G37310 | 45.68571831 | 1.080615427 | 5.4018 | 1.26E-11   |
| AT1G54970 | 22.65814601 | 0           | 5.3287 | 4.83E-06   |
| AT5G47980 | 31.52437705 | 0           | 5.2202 | 3.68E-08   |
| AT4G18630 | 15.47485697 | 0           | 5.1936 | 0.00026424 |
| AT2G23630 | 13.7508676  | 0           | 5.1932 | 0.00067413 |
| AT5G48010 | 334.4128904 | 9.302689327 | 5.1678 | 3.21E-82   |
| AT1G66725 | 57.26107551 | 1.597431501 | 5.1637 | 2.24E-14   |
| AT3G28345 | 89.72954198 | 2.584080369 | 5.1179 | 3.09E-22   |
| AT4G11210 | 29.30781929 | 0           | 5.115  | 1.33E-07   |
| AT3G22550 | 11.00069408 | 0           | 5.0639 | 0.0030628  |
| AT5G08640 | 1498.639331 | 45.33886465 | 5.0468 | 0          |
| AT5G48880 | 383.710777  | 12.12168609 | 4.9844 | 1.08E-93   |
| AT3G49960 | 22.12453025 | 0           | 4.9724 | 7.40E-06   |
| AT2G24762 | 14.61286228 | 0           | 4.9589 | 0.00045175 |
| AT3G61220 | 92.27447867 | 3.006929883 | 4.9396 | 1.06E-22   |
| AT4G12510 | 22.20662498 | 0           | 4.8846 | 7.44E-06   |
| AT4G18422 | 17.85560419 | 0           | 4.8696 | 7.99E-05   |
| AT3G62680 | 46.87609192 | 1.64441478  | 4.8332 | 1.06E-11   |
| AT1G65060 | 243.739259  | 8.738889974 | 4.8017 | 4.89E-59   |
| AT5G13930 | 5106.046041 | 184.9261878 | 4.7872 | 0          |

|           |             |             |        |            |
|-----------|-------------|-------------|--------|------------|
| AT1G57590 | 16.78837268 | 0           | 4.7807 | 0.00015015 |
| AT4G37160 | 19.0459778  | 0           | 4.7562 | 4.50E-05   |
| AT4G12520 | 119.3246928 | 4.416428266 | 4.7559 | 5.76E-29   |
| AT3G57020 | 422.295301  | 15.64543205 | 4.7544 | 7.04E-102  |
| AT1G31320 | 11.37012037 | 0           | 4.749  | 0.0027626  |
| AT5G04960 | 30.12876661 | 1.127598706 | 4.7398 | 1.14E-07   |
| AT1G80340 | 24.71051431 | 0           | 4.7168 | 2.18E-06   |
| AT4G08400 | 36.86053463 | 1.409498383 | 4.7088 | 3.02E-09   |
| AT5G57785 | 48.64112866 | 1.879331177 | 4.6939 | 5.05E-12   |
| AT5G10230 | 35.21863999 | 1.362515103 | 4.692  | 7.45E-09   |
| AT3G14060 | 22.86338284 | 0           | 4.6787 | 6.07E-06   |
| AT4G15480 | 182.2913522 | 7.141458473 | 4.6739 | 7.39E-44   |
| AT1G49450 | 23.68433016 | 0           | 4.6556 | 3.99E-06   |
| AT3G49330 | 14.20238862 | 0           | 4.6548 | 0.00064396 |
| AT5G48000 | 203.471793  | 8.17509062  | 4.6375 | 8.47E-49   |
| AT4G37760 | 73.3105956  | 2.959946604 | 4.6304 | 8.30E-18   |
| AT1G78990 | 33.04312959 | 1.362515103 | 4.6    | 2.77E-08   |
| AT2G46420 | 29.51305612 | 1.221565265 | 4.5946 | 1.85E-07   |
| AT5G13900 | 39.24128185 | 1.64441478  | 4.5767 | 1.01E-09   |
| AT5G07190 | 11.86268876 | 0           | 4.5684 | 0.0023095  |
| AT4G08410 | 57.46631234 | 2.44313053  | 4.5559 | 5.59E-14   |
| AT4G11780 | 10.91859934 | 0           | 4.5385 | 0.0038056  |
| AT4G31330 | 11.8216414  | 0           | 4.5156 | 0.0024199  |
| AT3G23290 | 11.329073   | 0           | 4.4542 | 0.0032094  |
| AT5G58910 | 13.3814413  | 0           | 4.4534 | 0.0011023  |
| AT2G22590 | 169.3614319 | 7.893190944 | 4.4234 | 5.74E-40   |
| AT3G21560 | 370.5345725 | 17.28984683 | 4.4216 | 3.43E-87   |
| AT3G02885 | 39.93908708 | 1.879331177 | 4.4095 | 9.42E-10   |

|           |             |             |        |            |
|-----------|-------------|-------------|--------|------------|
| AT5G66690 | 216.4838081 | 10.19537164 | 4.4083 | 6.19E-51   |
| AT5G47990 | 185.9856151 | 8.785873253 | 4.4039 | 8.66E-44   |
| AT3G55120 | 677.6509646 | 32.46544608 | 4.3836 | 1.06E-158  |
| AT5G22410 | 11.5753572  | 0           | 4.3597 | 0.00298    |
| AT4G04745 | 28.77420354 | 1.409498383 | 4.3515 | 3.81E-07   |
| AT1G42550 | 102.8236517 | 5.121177458 | 4.3276 | 3.54E-24   |
| AT5G23660 | 31.11390339 | 1.550448221 | 4.3268 | 1.16E-07   |
| AT5G09520 | 52.78691262 | 2.631063648 | 4.3265 | 1.26E-12   |
| AT5G26270 | 13.87400969 | 0           | 4.2991 | 0.00094891 |
| AT4G20240 | 40.71898703 | 2.114247574 | 4.2675 | 8.44E-10   |
| AT1G52100 | 15.26962014 | 0           | 4.2568 | 0.00048222 |
| AT5G19730 | 18.75864624 | 0           | 4.2489 | 7.97E-05   |
| AT5G50760 | 31.11390339 | 1.64441478  | 4.2419 | 1.34E-07   |
| AT5G66580 | 13.99715179 | 0           | 4.2188 | 0.00094766 |
| AT2G34610 | 31.97589808 | 1.738381339 | 4.2012 | 9.24E-08   |
| AT2G36090 | 24.13585118 | 1.315531824 | 4.1975 | 5.29E-06   |
| AT3G26290 | 12.06792559 | 0           | 4.1975 | 0.0025813  |
| AT2G34810 | 33.45360325 | 1.832347898 | 4.1904 | 4.36E-08   |
| AT5G08050 | 48.47693919 | 2.678046927 | 4.178  | 1.84E-11   |
| AT5G36180 | 62.30990152 | 3.476762678 | 4.1636 | 1.42E-14   |
| AT1G64170 | 32.63265593 | 1.832347898 | 4.1546 | 7.19E-08   |
| AT4G11050 | 14.12029389 | 0           | 4.1439 | 0.0009471  |
| AT3G49120 | 410.2273754 | 23.91448923 | 4.1005 | 3.01E-93   |
| AT4G28740 | 20.93415664 | 1.221565265 | 4.0991 | 3.13E-05   |
| AT3G08040 | 39.44651868 | 2.302180692 | 4.0988 | 2.44E-09   |
| AT3G44990 | 185.9035204 | 10.90012083 | 4.0921 | 2.61E-42   |
| AT5G49080 | 41.53993435 | 2.44313053  | 4.0877 | 8.57E-10   |
| AT1G77760 | 215.7039081 | 12.779452   | 4.0772 | 5.71E-49   |

|           |             |             |        |            |
|-----------|-------------|-------------|--------|------------|
| AT1G16400 | 69.24690637 | 4.13452859  | 4.066  | 5.84E-16   |
| AT4G02850 | 11.73954666 | 0           | 4.0581 | 0.0033456  |
| AT5G50100 | 46.67085509 | 2.818996766 | 4.0493 | 6.85E-11   |
| AT4G04850 | 43.51020791 | 2.631063648 | 4.0476 | 3.51E-10   |
| AT1G22750 | 65.79892763 | 3.993578751 | 4.0423 | 3.86E-15   |
| AT2G40130 | 21.63196186 | 1.315531824 | 4.0394 | 2.39E-05   |
| AT5G26310 | 26.72183524 | 1.64441478  | 4.0224 | 1.89E-06   |
| AT4G17280 | 75.65029546 | 4.839277781 | 3.9665 | 3.60E-17   |
| AT2G25000 | 16.74732531 | 1.080615427 | 3.954  | 0.00031092 |
| AT1G55990 | 82.46415821 | 5.356093855 | 3.9445 | 1.30E-18   |
| AT5G05270 | 746.2411131 | 48.8626106  | 3.9328 | 1.10E-165  |
| AT3G45710 | 80.82226357 | 5.309110575 | 3.9282 | 3.29E-18   |
| AT1G15550 | 18.59445678 | 1.221565265 | 3.9281 | 0.00012746 |
| AT1G23010 | 76.47124278 | 5.027210899 | 3.9271 | 2.96E-17   |
| AT3G58990 | 60.01124903 | 3.946595472 | 3.9266 | 1.24E-13   |
| AT1G12740 | 87.43088949 | 5.872909928 | 3.896  | 1.44E-19   |
| AT1G14160 | 22.69919337 | 1.550448221 | 3.8719 | 1.82E-05   |
| AT5G13630 | 88.7444052  | 6.107826326 | 3.8609 | 9.38E-20   |
| AT2G24980 | 115.5072878 | 8.034140782 | 3.8457 | 1.55E-25   |
| AT5G19600 | 28.85629827 | 2.020281015 | 3.8363 | 9.41E-07   |
| AT4G13390 | 55.00347038 | 3.852628913 | 3.8356 | 2.25E-12   |
| AT2G15370 | 16.04952009 | 1.127598706 | 3.8312 | 0.00050507 |
| AT3G52740 | 56.48117556 | 3.993578751 | 3.822  | 1.15E-12   |
| AT1G78370 | 47.73808661 | 3.382796119 | 3.8189 | 8.77E-11   |
| AT1G01580 | 145.3076755 | 10.33632147 | 3.8133 | 6.98E-32   |
| AT2G18050 | 53.81309677 | 3.852628913 | 3.804  | 4.63E-12   |
| AT5G47950 | 19.57959356 | 1.409498383 | 3.7961 | 9.46E-05   |
| AT5G64940 | 62.63828045 | 4.557378104 | 3.7808 | 6.59E-14   |

|           |             |             |        |            |
|-----------|-------------|-------------|--------|------------|
| AT2G03090 | 82.05368455 | 6.013859767 | 3.7702 | 4.75E-18   |
| AT4G35420 | 15.35171487 | 1.127598706 | 3.7671 | 0.00076098 |
| AT1G51860 | 46.95818665 | 3.476762678 | 3.7556 | 1.64E-10   |
| AT5G48850 | 25.77774582 | 1.926314457 | 3.7422 | 5.15E-06   |
| AT2G21100 | 36.4090136  | 2.725030207 | 3.74   | 2.99E-08   |
| AT4G08040 | 17.52722526 | 1.315531824 | 3.7359 | 0.0002818  |
| AT1G22430 | 22.86338284 | 1.738381339 | 3.7172 | 2.22E-05   |
| AT3G01420 | 353.0073472 | 26.96840239 | 3.7104 | 8.71E-76   |
| AT1G13830 | 19.66168829 | 1.503464942 | 3.709  | 0.00010443 |
| AT4G15500 | 22.65814601 | 1.738381339 | 3.7042 | 2.51E-05   |
| AT4G15393 | 83.03882133 | 6.389726002 | 3.7    | 4.75E-18   |
| AT1G07500 | 12.19106769 | 0           | 3.6975 | 0.0036749  |
| AT4G22460 | 16.91151477 | 1.315531824 | 3.6843 | 0.00040467 |
| AT4G12330 | 15.63904643 | 1.221565265 | 3.6783 | 0.00074226 |
| AT1G18870 | 31.81170862 | 2.49011381  | 3.6753 | 3.32E-07   |
| AT3G44310 | 351.2012631 | 27.6261683  | 3.6682 | 7.51E-75   |
| AT4G01680 | 11.94478349 | 0           | 3.6681 | 0.0042547  |
| AT5G41040 | 166.570211  | 13.10833496 | 3.6676 | 1.27E-35   |
| AT4G30470 | 189.7209254 | 14.94068286 | 3.6666 | 1.61E-40   |
| AT1G73620 | 27.33754573 | 2.161230854 | 3.661  | 2.94E-06   |
| AT1G10960 | 78.11313741 | 6.201792884 | 3.6548 | 7.04E-17   |
| AT4G33610 | 115.7125246 | 9.208722768 | 3.6514 | 8.87E-25   |
| AT2G39310 | 222.1483446 | 17.71269634 | 3.6487 | 2.90E-47   |
| AT4G36610 | 57.71259653 | 4.604361384 | 3.6478 | 1.43E-12   |
| AT2G43100 | 64.11598562 | 5.121177458 | 3.6461 | 6.55E-14   |
| AT3G25790 | 15.22857277 | 1.221565265 | 3.64   | 0.00094519 |
| AT1G73650 | 109.9658934 | 8.832856532 | 3.638  | 1.66E-23   |
| AT5G20700 | 290.6974457 | 23.49163971 | 3.6293 | 1.50E-61   |

|           |             |             |        |            |
|-----------|-------------|-------------|--------|------------|
| AT4G28250 | 119.0373613 | 9.631572283 | 3.6275 | 2.25E-25   |
| AT5G62920 | 23.76642489 | 1.926314457 | 3.625  | 1.72E-05   |
| AT1G01420 | 12.10897296 | 0           | 3.6174 | 0.004148   |
| AT5G24770 | 86.93832109 | 7.141458473 | 3.6057 | 1.45E-18   |
| AT5G17050 | 281.2155042 | 23.25672332 | 3.596  | 3.47E-59   |
| AT4G25250 | 13.6277255  | 1.127598706 | 3.5952 | 0.0021191  |
| AT4G26850 | 119.1605034 | 9.86648868  | 3.5942 | 3.04E-25   |
| AT5G37690 | 76.34810068 | 6.342742723 | 3.5894 | 2.58E-16   |
| AT1G35515 | 12.35525715 | 1.033632147 | 3.5793 | 0.0038489  |
| AT2G19970 | 29.14362983 | 2.44313053  | 3.5764 | 1.54E-06   |
| AT5G16530 | 12.31420979 | 1.033632147 | 3.5745 | 0.0039408  |
| AT4G35060 | 66.98930124 | 5.637993531 | 3.5707 | 2.56E-14   |
| AT2G24190 | 17.1167516  | 1.456481662 | 3.5548 | 0.00044545 |
| AT5G47110 | 58.45144912 | 4.980227619 | 3.553  | 1.64E-12   |
| AT4G31910 | 70.27309052 | 6.013859767 | 3.5466 | 6.24E-15   |
| AT5G06630 | 69.0827169  | 5.919893208 | 3.5447 | 1.11E-14   |
| AT1G14960 | 43.55125528 | 3.758662354 | 3.5344 | 2.02E-09   |
| AT5G64120 | 755.3536283 | 65.40072496 | 3.5298 | 1.17E-156  |
| AT3G09600 | 15.72114116 | 1.362515103 | 3.5284 | 0.00087529 |
| AT3G46270 | 13.54563077 | 1.174581986 | 3.5276 | 0.0023868  |
| AT3G20370 | 302.7243239 | 26.31063648 | 3.5243 | 8.11E-63   |
| AT5G49270 | 27.50173519 | 2.396147251 | 3.5207 | 3.81E-06   |
| AT5G62720 | 40.92422386 | 3.570729237 | 3.5187 | 7.24E-09   |
| AT4G29905 | 163.1222323 | 14.28291695 | 3.5136 | 6.55E-34   |
| AT4G00880 | 41.17050805 | 3.617712516 | 3.5085 | 6.73E-09   |
| AT5G06640 | 132.0083289 | 11.60487002 | 3.5078 | 1.83E-27   |
| AT2G22980 | 13.21725184 | 1.174581986 | 3.4922 | 0.0028772  |
| AT1G34040 | 42.77135533 | 3.805645634 | 3.4904 | 3.46E-09   |

|           |             |             |        |            |
|-----------|-------------|-------------|--------|------------|
| AT1G67195 | 36.36796624 | 3.241846281 | 3.4878 | 6.87E-08   |
| AT2G25530 | 72.73593247 | 6.483692561 | 3.4878 | 2.90E-15   |
| AT4G15290 | 16.29580428 | 1.456481662 | 3.4839 | 0.00071936 |
| AT2G40230 | 12.56049398 | 1.127598706 | 3.4776 | 0.0039278  |
| AT2G48130 | 144.7330124 | 13.0143684  | 3.4752 | 6.83E-30   |
| AT1G54540 | 29.14362983 | 2.631063648 | 3.4695 | 2.05E-06   |
| AT3G10710 | 14.48972018 | 1.315531824 | 3.4613 | 0.001693   |
| AT4G19690 | 218.3309395 | 19.92091048 | 3.4542 | 9.81E-45   |
| AT5G26010 | 24.05375645 | 2.208214133 | 3.4453 | 2.24E-05   |
| AT4G25640 | 799.1101204 | 73.57581558 | 3.4411 | 9.39E-163  |
| AT5G48485 | 17.85560419 | 1.64441478  | 3.4407 | 0.00038213 |
| AT1G78090 | 55.5781335  | 5.121177458 | 3.44   | 1.15E-11   |
| AT2G29340 | 13.7508676  | 1.268548545 | 3.4383 | 0.0024303  |
| AT2G28470 | 76.30705331 | 7.047491914 | 3.4366 | 7.84E-16   |
| AT1G77990 | 14.20238862 | 1.315531824 | 3.4324 | 0.0020067  |
| AT2G15620 | 381.4121245 | 35.33142613 | 3.4323 | 1.25E-77   |
| AT1G30530 | 70.92984837 | 6.57765912  | 3.4307 | 9.98E-15   |
| AT4G34881 | 351.2012631 | 32.6533792  | 3.427  | 2.02E-71   |
| AT3G48100 | 46.0551446  | 4.322461707 | 3.4134 | 1.06E-09   |
| AT5G07475 | 44.82372362 | 4.228495148 | 3.406  | 1.93E-09   |
| AT3G51820 | 33.98721901 | 3.241846281 | 3.3901 | 2.85E-07   |
| AT4G13770 | 135.0047866 | 13.0143684  | 3.3748 | 2.60E-27   |
| AT5G64700 | 12.56049398 | 1.221565265 | 3.3621 | 0.004523   |
| AT5G24120 | 55.00347038 | 5.356093855 | 3.3603 | 2.32E-11   |
| AT1G65970 | 60.21648586 | 5.919893208 | 3.3465 | 2.37E-12   |
| AT2G41370 | 25.69565109 | 2.537097089 | 3.3403 | 1.38E-05   |
| AT2G05620 | 20.40054088 | 2.020281015 | 3.336  | 0.00014778 |
| AT2G01530 | 456.4467094 | 45.29188137 | 3.3331 | 6.99E-91   |



|           |             |             |        |            |
|-----------|-------------|-------------|--------|------------|
| AT1G69310 | 102.4952728 | 10.33632147 | 3.3098 | 1.58E-20   |
| AT3G09270 | 244.7243958 | 24.76018826 | 3.3051 | 1.69E-48   |
| AT4G19030 | 59.19030171 | 6.013859767 | 3.299  | 5.04E-12   |
| AT2G37970 | 313.1503549 | 31.85466345 | 3.2973 | 6.89E-62   |
| AT3G46130 | 16.09056745 | 1.64441478  | 3.2906 | 0.0010665  |
| AT2G37460 | 23.39699859 | 2.396147251 | 3.2875 | 4.37E-05   |
| AT2G47360 | 21.91929342 | 2.255197413 | 3.2809 | 8.47E-05   |
| AT2G43920 | 310.6464656 | 31.99561329 | 3.2793 | 3.89E-61   |
| AT2G47010 | 17.77350946 | 1.832347898 | 3.278  | 0.00052803 |
| AT4G22666 | 41.74517118 | 4.322461707 | 3.2717 | 1.38E-08   |
| AT3G09260 | 9154.876124 | 952.1631409 | 3.2653 | 0          |
| AT3G01260 | 18.06084102 | 1.879331177 | 3.2646 | 0.00047829 |
| AT4G35030 | 30.70342973 | 3.194863001 | 3.2646 | 1.88E-06   |
| AT5G56080 | 50.48826013 | 5.262127296 | 3.2622 | 3.05E-10   |
| AT3G09925 | 20.68787244 | 2.161230854 | 3.2589 | 0.00015321 |
| AT5G48800 | 19.33330937 | 2.020281015 | 3.2585 | 0.00027895 |
| AT1G13510 | 13.46353603 | 1.409498383 | 3.2558 | 0.0035043  |
| AT4G09990 | 23.19176177 | 2.44313053  | 3.2468 | 5.25E-05   |
| AT1G64780 | 144.4867282 | 15.31654909 | 3.2378 | 2.63E-28   |
| AT5G48290 | 34.02826638 | 3.617712516 | 3.2336 | 4.82E-07   |
| AT1G28130 | 54.59299672 | 5.825926649 | 3.2282 | 5.96E-11   |
| AT1G68238 | 18.47131468 | 1.973297736 | 3.2266 | 0.00043063 |
| AT5G13580 | 68.95957481 | 7.37637487  | 3.2248 | 1.09E-13   |
| AT4G37470 | 63.99284353 | 6.859558796 | 3.2217 | 1.00E-12   |
| AT3G54600 | 55.98860716 | 6.013859767 | 3.2188 | 3.42E-11   |
| AT4G37750 | 33.57674535 | 3.617712516 | 3.2143 | 6.33E-07   |
| AT2G24820 | 20.40054088 | 2.208214133 | 3.2077 | 0.00019459 |
| AT3G54590 | 210.4498453 | 22.97482364 | 3.1954 | 1.19E-40   |

|           |             |             |        |            |
|-----------|-------------|-------------|--------|------------|
| AT5G24380 | 66.37359075 | 7.282408311 | 3.1881 | 4.46E-13   |
| AT5G66460 | 16.45999375 | 1.832347898 | 3.1672 | 0.0011241  |
| AT1G13250 | 14.28448335 | 1.597431501 | 3.1606 | 0.0028532  |
| AT2G28690 | 13.01201501 | 1.456481662 | 3.1593 | 0.0048712  |
| AT5G07130 | 29.34886666 | 3.28882956  | 3.1577 | 4.74E-06   |
| AT2G18800 | 20.52368298 | 2.302180692 | 3.1562 | 0.00020727 |
| AT4G28660 | 23.35595123 | 2.631063648 | 3.1501 | 6.26E-05   |
| AT4G36530 | 22.00138815 | 2.49011381  | 3.1433 | 0.00011337 |
| AT1G07610 | 346.0703424 | 39.2780216  | 3.1393 | 9.30E-66   |
| AT3G50300 | 37.96881351 | 4.322461707 | 3.1349 | 1.31E-07   |
| AT1G69230 | 25.49041426 | 2.912963325 | 3.1294 | 2.68E-05   |
| AT2G48080 | 19.25121463 | 2.208214133 | 3.124  | 0.00038153 |
| AT1G01600 | 17.15779897 | 1.973297736 | 3.1202 | 0.00091731 |
| AT1G50250 | 126.5900766 | 14.70576646 | 3.1057 | 4.99E-24   |
| AT2G38380 | 539.0750571 | 62.67569476 | 3.1045 | 2.04E-101  |
| AT2G34080 | 29.43096139 | 3.429779398 | 3.1011 | 5.51E-06   |
| AT3G25930 | 76.59438487 | 8.926823091 | 3.101  | 1.07E-14   |
| AT4G12030 | 32.63265593 | 3.805645634 | 3.1001 | 1.44E-06   |
| AT4G11190 | 50.24197593 | 5.919893208 | 3.0853 | 9.06E-10   |
| AT3G21520 | 17.1167516  | 2.020281015 | 3.0828 | 0.0010004  |
| AT5G61420 | 34.02826638 | 4.040562031 | 3.0741 | 8.84E-07   |
| AT4G02290 | 175.1080632 | 20.86057607 | 3.0694 | 8.54E-33   |
| AT5G06330 | 15.35171487 | 1.832347898 | 3.0666 | 0.0021456  |
| AT4G14440 | 54.92137565 | 6.57765912  | 3.0617 | 1.44E-10   |
| AT5G23190 | 64.32122245 | 7.752241106 | 3.0526 | 2.93E-12   |
| AT3G63520 | 212.0506925 | 25.60588729 | 3.0499 | 2.00E-39   |
| AT3G59340 | 15.88533062 | 1.926314457 | 3.0438 | 0.0017979  |
| AT5G14200 | 196.4526935 | 23.86750595 | 3.0411 | 1.84E-36   |

|           |             |             |        |            |
|-----------|-------------|-------------|--------|------------|
| AT1G03820 | 30.53924027 | 3.711679075 | 3.0405 | 4.28E-06   |
| AT4G00700 | 42.48402376 | 5.168160737 | 3.0392 | 3.01E-08   |
| AT2G34490 | 18.14293575 | 2.208214133 | 3.0385 | 0.00071936 |
| AT3G45700 | 13.87400969 | 1.691398059 | 3.0361 | 0.0040957  |
| AT3G22620 | 221.1632078 | 27.01538567 | 3.0333 | 6.51E-41   |
| AT1G58360 | 37.55833985 | 4.604361384 | 3.0281 | 2.47E-07   |
| AT3G62270 | 102.9057465 | 12.68548545 | 3.0201 | 3.73E-19   |
| AT2G21960 | 29.67724559 | 3.664695795 | 3.0176 | 6.62E-06   |
| AT2G48140 | 87.47193685 | 10.85313755 | 3.0107 | 2.57E-16   |
| AT1G60270 | 33.04312959 | 4.13452859  | 2.9986 | 1.80E-06   |
| AT1G13970 | 19.4154041  | 2.44313053  | 2.9904 | 0.0004788  |
| AT2G30210 | 129.217108  | 16.30319796 | 2.9866 | 9.98E-24   |
| AT5G67400 | 36.61425043 | 4.651344663 | 2.9767 | 4.53E-07   |
| AT1G10470 | 131.3515711 | 16.77303076 | 2.9692 | 5.41E-24   |
| AT5G42590 | 21.63196186 | 2.772013486 | 2.9642 | 0.00020829 |
| AT3G60550 | 47.40970768 | 6.154809605 | 2.9454 | 6.50E-09   |
| AT3G20100 | 59.64182273 | 7.752241106 | 2.9436 | 4.58E-11   |
| AT1G62870 | 20.56473034 | 2.678046927 | 2.9409 | 0.00033962 |
| AT5G06270 | 16.21370955 | 2.114247574 | 2.939  | 0.0019194  |
| AT4G29140 | 20.15425668 | 2.631063648 | 2.9374 | 0.00040274 |
| AT1G21910 | 115.6714773 | 15.17559926 | 2.9302 | 6.27E-21   |
| AT4G09760 | 20.40054088 | 2.678046927 | 2.9294 | 0.00037318 |
| AT1G53090 | 35.71120838 | 4.698327943 | 2.9262 | 8.16E-07   |
| AT1G20160 | 26.7628826  | 3.523745957 | 2.9251 | 2.96E-05   |
| AT5G24090 | 19.62064093 | 2.584080369 | 2.9246 | 0.0005132  |
| AT4G25820 | 43.71544474 | 5.77894337  | 2.9193 | 3.37E-08   |
| AT2G20750 | 15.26962014 | 2.020281015 | 2.918  | 0.0028772  |
| AT1G46480 | 20.56473034 | 2.725030207 | 2.9158 | 0.00036156 |

|           |             |             |        |            |
|-----------|-------------|-------------|--------|------------|
| AT1G52870 | 17.3630358  | 2.302180692 | 2.9149 | 0.0012699  |
| AT1G06000 | 164.3536533 | 21.80024165 | 2.9144 | 1.87E-29   |
| AT3G29250 | 104.2603095 | 13.86006743 | 2.9112 | 8.43E-19   |
| AT1G44970 | 18.01979365 | 2.396147251 | 2.9108 | 0.00098975 |
| AT2G41170 | 21.18044083 | 2.818996766 | 2.9095 | 0.00028867 |
| AT4G14690 | 65.26531187 | 8.691906694 | 2.9086 | 6.14E-12   |
| AT3G26440 | 104.2603095 | 13.90705071 | 2.9063 | 8.95E-19   |
| AT3G26210 | 24.8336564  | 3.335812839 | 2.8962 | 6.96E-05   |
| AT1G55320 | 142.5985493 | 19.21616129 | 2.8916 | 2.01E-25   |
| AT1G78570 | 1139.474879 | 153.8232568 | 2.889  | 3.16E-201  |
| AT1G30510 | 320.1284071 | 43.22461707 | 2.8887 | 1.21E-56   |
| AT1G48930 | 20.15425668 | 2.725030207 | 2.8867 | 0.00045611 |
| AT2G47540 | 29.96457715 | 4.08754531  | 2.874  | 9.89E-06   |
| AT5G54230 | 25.81879319 | 3.523745957 | 2.8732 | 5.08E-05   |
| AT4G00370 | 75.36296389 | 10.28933819 | 2.8727 | 1.46E-13   |
| AT1G52070 | 72.24336408 | 9.913471959 | 2.8654 | 5.45E-13   |
| AT2G22920 | 41.99145537 | 5.825926649 | 2.8495 | 9.77E-08   |
| AT1G74460 | 129.0118712 | 17.99459602 | 2.8419 | 1.11E-22   |
| AT1G24280 | 106.2716305 | 14.8467163  | 2.8395 | 9.72E-19   |
| AT1G49430 | 53.6489073  | 7.517324708 | 2.8353 | 1.09E-09   |
| AT2G25810 | 54.96242301 | 7.705257826 | 2.8345 | 6.54E-10   |
| AT5G03760 | 82.54625294 | 11.74581986 | 2.8131 | 1.53E-14   |
| AT4G37070 | 67.56396436 | 9.725538842 | 2.7964 | 6.33E-12   |
| AT4G09750 | 85.46061592 | 12.40358577 | 2.7845 | 6.71E-15   |
| AT1G67750 | 16.78837268 | 2.44313053  | 2.7807 | 0.0021189  |
| AT5G02780 | 45.97304987 | 6.718608958 | 2.7746 | 3.16E-08   |
| AT1G02730 | 43.63335001 | 6.389726002 | 2.7716 | 7.90E-08   |
| AT5G42500 | 36.7784399  | 5.403077134 | 2.767  | 1.11E-06   |

|           |             |             |        |            |
|-----------|-------------|-------------|--------|------------|
| AT1G13420 | 64.56750665 | 9.490622444 | 2.7662 | 2.63E-11   |
| AT2G22510 | 136.1541129 | 20.15582687 | 2.756  | 2.99E-23   |
| AT5G53370 | 93.71113648 | 13.90705071 | 2.7524 | 3.99E-16   |
| AT4G33110 | 20.11320932 | 3.006929883 | 2.7418 | 0.00066776 |
| AT4G24130 | 120.3919243 | 18.0415793  | 2.7383 | 1.75E-20   |
| AT2G32990 | 63.2950383  | 9.490622444 | 2.7375 | 5.44E-11   |
| AT1G78120 | 58.73878068 | 8.832856532 | 2.7334 | 3.21E-10   |
| AT5G25460 | 154.8306644 | 23.3037066  | 2.7321 | 3.57E-26   |
| AT5G38030 | 88.12869471 | 13.34325136 | 2.7235 | 4.84E-15   |
| AT1G12110 | 208.3153822 | 31.57276378 | 2.722  | 5.41E-35   |
| AT2G28950 | 18.26607785 | 2.772013486 | 2.7202 | 0.001391   |
| AT1G07090 | 21.2214882  | 3.241846281 | 2.7106 | 0.00048147 |
| AT4G21230 | 15.35171487 | 2.349163971 | 2.7082 | 0.0041563  |
| AT3G02020 | 48.47693919 | 7.42335815  | 2.7072 | 1.85E-08   |
| AT5G65380 | 289.5070721 | 44.5401489  | 2.7004 | 3.75E-48   |
| AT5G01840 | 18.26607785 | 2.818996766 | 2.6959 | 0.0014758  |
| AT5G07680 | 35.91644521 | 5.544026972 | 2.6956 | 2.17E-06   |
| AT5G58330 | 30.33400344 | 4.745311222 | 2.6764 | 1.85E-05   |
| AT3G23530 | 201.0910458 | 31.5257805  | 2.6732 | 3.26E-33   |
| AT1G80240 | 55.08556511 | 8.644923415 | 2.6717 | 2.02E-09   |
| AT4G40090 | 35.25968736 | 5.544026972 | 2.669  | 3.13E-06   |
| AT3G27170 | 95.59931531 | 15.03464942 | 2.6687 | 5.62E-16   |
| AT5G19940 | 32.7968454  | 5.168160737 | 2.6658 | 7.80E-06   |
| AT2G33250 | 35.38282945 | 5.591010252 | 2.6619 | 3.10E-06   |
| AT5G24850 | 64.93693294 | 10.28933819 | 2.6579 | 5.81E-11   |
| AT2G31570 | 194.7697515 | 30.86801458 | 2.6576 | 5.37E-32   |
| AT5G51110 | 21.91929342 | 3.476762678 | 2.6564 | 0.00043567 |
| AT3G50400 | 28.11744568 | 4.463411546 | 2.6552 | 4.54E-05   |

|           |             |             |        |            |
|-----------|-------------|-------------|--------|------------|
| AT1G07590 | 517.8535689 | 82.220739   | 2.655  | 1.40E-84   |
| AT4G18640 | 47.45075504 | 7.564307988 | 2.6492 | 3.93E-08   |
| AT4G00080 | 24.99784587 | 3.993578751 | 2.646  | 0.00014647 |
| AT5G38020 | 121.6643927 | 19.45107768 | 2.645  | 5.00E-20   |
| AT3G32980 | 1072.157199 | 171.4889699 | 2.6443 | 3.29E-174  |
| AT5G09530 | 457.8012725 | 73.34089919 | 2.642  | 1.97E-74   |
| AT5G24930 | 60.13439113 | 9.678555562 | 2.6353 | 4.18E-10   |
| AT1G16060 | 29.10258246 | 4.698327943 | 2.6309 | 3.48E-05   |
| AT4G30980 | 20.93415664 | 3.382796119 | 2.6296 | 0.00066898 |
| AT4G32770 | 17.73246209 | 2.865980045 | 2.6293 | 0.0021065  |
| AT4G20390 | 78.76989527 | 12.73246872 | 2.6291 | 4.70E-13   |
| AT5G28500 | 20.89310927 | 3.382796119 | 2.6267 | 0.00068388 |
| AT2G17500 | 244.1086853 | 39.60690456 | 2.6237 | 1.60E-39   |
| AT2G40480 | 56.68641238 | 9.208722768 | 2.6219 | 1.64E-09   |
| AT2G01900 | 17.89665156 | 2.912963325 | 2.6191 | 0.002036   |
| AT3G57010 | 100.2376677 | 16.35018124 | 2.616  | 2.06E-16   |
| AT4G01440 | 35.13654526 | 5.73196009  | 2.6159 | 4.20E-06   |
| AT1G13080 | 21.54986713 | 3.523745957 | 2.6125 | 0.00056459 |
| AT1G02810 | 115.5483352 | 18.93426161 | 2.6094 | 8.53E-19   |
| AT1G08990 | 25.61355636 | 4.228495148 | 2.5987 | 0.00013761 |
| AT4G18570 | 18.18398312 | 3.006929883 | 2.5963 | 0.0019442  |
| AT4G21740 | 19.00493044 | 3.147879722 | 2.5939 | 0.0014562  |
| AT2G28250 | 60.62695952 | 10.0544218  | 2.5921 | 5.00E-10   |
| AT3G56940 | 30.58028764 | 5.074194178 | 2.5914 | 2.40E-05   |
| AT1G74470 | 78.64675317 | 13.06135168 | 2.5901 | 7.53E-13   |
| AT1G12370 | 42.03250274 | 7.000508635 | 2.586  | 4.13E-07   |
| AT3G44550 | 81.60216352 | 13.62515103 | 2.5823 | 2.80E-13   |
| AT4G08150 | 20.76996717 | 3.476762678 | 2.5787 | 0.00081583 |

|           |             |             |        |            |
|-----------|-------------|-------------|--------|------------|
| AT3G16450 | 676.9531593 | 113.4646198 | 2.5768 | 2.66E-107  |
| AT1G75500 | 237.8694857 | 39.88880423 | 2.5761 | 7.71E-38   |
| AT1G78510 | 43.46916055 | 7.329391591 | 2.5682 | 2.76E-07   |
| AT5G53110 | 20.81101454 | 3.523745957 | 2.5622 | 0.00084131 |
| AT1G62980 | 18.01979365 | 3.053913163 | 2.5609 | 0.0022419  |
| AT1G79410 | 20.31844615 | 3.476762678 | 2.547  | 0.0010398  |
| AT5G22020 | 237.0895858 | 40.78148654 | 2.5394 | 3.52E-37   |
| AT3G50640 | 28.32268251 | 4.88626106  | 2.5352 | 6.69E-05   |
| AT1G72230 | 34.80816633 | 6.013859767 | 2.5331 | 7.01E-06   |
| AT4G25470 | 30.70342973 | 5.309110575 | 2.5319 | 2.96E-05   |
| AT2G45750 | 63.25399094 | 10.99408739 | 2.5244 | 3.51E-10   |
| AT4G11650 | 193.0047147 | 33.54606151 | 2.5244 | 3.79E-30   |
| AT2G41660 | 124.0040926 | 21.56532526 | 2.5236 | 1.72E-19   |
| AT1G49310 | 32.63265593 | 5.684976811 | 2.5211 | 1.59E-05   |
| AT2G32430 | 28.40477724 | 4.980227619 | 2.5119 | 7.12E-05   |
| AT5G57625 | 25.40831953 | 4.463411546 | 2.5091 | 0.00020399 |
| AT1G59940 | 17.1167516  | 3.006929883 | 2.509  | 0.0034331  |
| AT5G10130 | 33.86407691 | 5.966876487 | 2.5047 | 1.12E-05   |
| AT1G06650 | 24.25899328 | 4.275478428 | 2.5044 | 0.00030886 |
| AT2G36570 | 77.78475849 | 13.71911759 | 2.5033 | 2.64E-12   |
| AT1G72240 | 23.60223542 | 4.181511869 | 2.4968 | 0.00039525 |
| AT4G38620 | 81.80740035 | 14.56481662 | 2.4897 | 7.63E-13   |
| AT2G25060 | 18.71759888 | 3.335812839 | 2.4883 | 0.0021204  |
| AT1G74090 | 56.56327029 | 10.10140508 | 2.4853 | 5.02E-09   |
| AT5G14650 | 20.48263561 | 3.664695795 | 2.4826 | 0.0011787  |
| AT5G11420 | 25.36727216 | 4.557378104 | 2.4767 | 0.00023296 |
| AT1G72160 | 229.2084915 | 41.25131934 | 2.4741 | 5.09E-35   |
| AT3G26300 | 22.65814601 | 4.08754531  | 2.4707 | 0.00059227 |

|           |             |             |        |            |
|-----------|-------------|-------------|--------|------------|
| AT2G41380 | 62.35094889 | 11.27598706 | 2.4672 | 8.02E-10   |
| AT4G32650 | 93.46485228 | 16.91398059 | 2.4662 | 1.79E-14   |
| AT4G03210 | 97.85692044 | 17.71269634 | 2.4659 | 3.95E-15   |
| AT1G18060 | 18.92283571 | 3.429779398 | 2.4639 | 0.0021123  |
| AT3G45070 | 44.74162889 | 8.128107341 | 2.4606 | 3.45E-07   |
| AT3G18170 | 35.13654526 | 6.389726002 | 2.4591 | 9.02E-06   |
| AT5G10470 | 108.1598093 | 19.68599408 | 2.4579 | 1.27E-16   |
| AT3G14940 | 376.0349195 | 68.45463813 | 2.4576 | 7.01E-57   |
| AT3G25640 | 18.75864624 | 3.429779398 | 2.4514 | 0.0023052  |
| AT3G15680 | 20.81101454 | 3.805645634 | 2.4511 | 0.0011574  |
| AT3G43670 | 49.25683915 | 9.02078965  | 2.449  | 8.06E-08   |
| AT1G54010 | 32.5505612  | 5.966876487 | 2.4476 | 2.29E-05   |
| AT3G18710 | 22.78128811 | 4.181511869 | 2.4458 | 0.00061557 |
| AT3G50740 | 94.36789433 | 17.33683011 | 2.4445 | 1.77E-14   |
| AT4G31890 | 24.25899328 | 4.463411546 | 2.4423 | 0.00038101 |
| AT1G66800 | 22.45290918 | 4.13452859  | 2.4411 | 0.00069402 |
| AT3G25110 | 57.54840707 | 10.61822115 | 2.4382 | 5.25E-09   |
| AT3G17040 | 26.39345631 | 4.88626106  | 2.4334 | 0.00019258 |
| AT4G18760 | 18.75864624 | 3.476762678 | 2.4317 | 0.0024234  |
| AT4G02410 | 22.04243552 | 4.08754531  | 2.431  | 0.00081942 |
| AT3G53980 | 61.24267001 | 11.36995362 | 2.4293 | 1.64E-09   |
| AT3G58810 | 26.27031421 | 4.88626106  | 2.4266 | 0.00020597 |
| AT2G05440 | 4932.785109 | 917.8183636 | 2.4261 | 0          |
| AT3G59370 | 50.32407066 | 9.396655886 | 2.421  | 6.88E-08   |
| AT2G47460 | 151.6289698 | 28.33091749 | 2.4201 | 9.29E-23   |
| AT3G23210 | 18.59445678 | 3.476762678 | 2.4191 | 0.0026433  |
| AT2G22240 | 41.37574488 | 7.752241106 | 2.4161 | 1.42E-06   |
| AT4G25090 | 24.66946694 | 4.651344663 | 2.407  | 0.00037606 |



|           |             |             |        |            |
|-----------|-------------|-------------|--------|------------|
| AT5G53250 | 80.61702674 | 15.22258253 | 2.4049 | 3.09E-12   |
| AT2G41310 | 64.48541192 | 12.21565265 | 2.4002 | 7.19E-10   |
| AT5G26670 | 17.56827263 | 3.335812839 | 2.3969 | 0.0038804  |
| AT4G34830 | 17.73246209 | 3.382796119 | 2.3901 | 0.0037444  |
| AT5G42250 | 84.39338441 | 16.11526484 | 2.3887 | 1.07E-12   |
| AT2G20724 | 17.19884634 | 3.28882956  | 2.3867 | 0.0044976  |
| AT1G73885 | 45.84990777 | 8.785873253 | 2.3837 | 3.93E-07   |
| AT3G25190 | 118.9142192 | 22.78689052 | 2.3836 | 1.14E-17   |
| AT5G45380 | 40.67793966 | 7.799224385 | 2.3828 | 2.17E-06   |
| AT1G30650 | 34.76711896 | 6.671625679 | 2.3816 | 1.51E-05   |
| AT3G44540 | 40.34956073 | 7.752241106 | 2.3799 | 2.47E-06   |
| AT1G12380 | 23.64328279 | 4.557378104 | 2.3752 | 0.00058714 |
| AT5G44110 | 141.5723652 | 27.29728535 | 2.3747 | 7.33E-21   |
| AT4G02270 | 31.77066125 | 6.154809605 | 2.3679 | 4.30E-05   |
| AT1G47530 | 388.0207504 | 75.17324708 | 2.3678 | 1.89E-56   |
| AT5G26290 | 72.69488511 | 14.14196711 | 2.3619 | 6.92E-11   |
| AT4G33950 | 17.85560419 | 3.476762678 | 2.3606 | 0.0038803  |
| AT5G10180 | 25.81879319 | 5.027210899 | 2.3606 | 0.00030723 |
| AT1G48500 | 29.0615351  | 5.684976811 | 2.3539 | 0.00010984 |
| AT3G63540 | 25.90088792 | 5.074194178 | 2.3518 | 0.00030913 |
| AT3G23810 | 877.797921  | 172.2876857 | 2.3491 | 2.03E-126  |
| AT1G35250 | 28.938393   | 5.684976811 | 2.3478 | 0.00011727 |
| AT4G26320 | 53.7720494  | 10.57123787 | 2.3467 | 3.86E-08   |
| AT1G16720 | 64.60855401 | 12.73246872 | 2.3432 | 1.19E-09   |
| AT1G65310 | 62.76142255 | 12.40358577 | 2.3391 | 2.25E-09   |
| AT2G30840 | 22.98652494 | 4.557378104 | 2.3345 | 0.00082426 |
| AT3G22800 | 85.05014226 | 16.86699731 | 2.3341 | 1.71E-12   |
| AT5G43630 | 129.0118712 | 25.74683713 | 2.325  | 1.23E-18   |

|           |             |             |        |            |
|-----------|-------------|-------------|--------|------------|
| AT3G22840 | 249.7321745 | 49.84925947 | 2.3247 | 1.01E-35   |
| AT2G31790 | 39.44651868 | 7.893190944 | 2.3212 | 4.61E-06   |
| AT3G54770 | 38.7076661  | 7.752241106 | 2.3199 | 5.88E-06   |
| AT4G18020 | 24.50527748 | 4.93324434  | 2.3125 | 0.00055492 |
| AT4G14550 | 33.82302955 | 6.812575517 | 2.3117 | 2.92E-05   |
| AT3G19450 | 534.2725153 | 107.9205928 | 2.3076 | 1.48E-75   |
| AT3G15354 | 35.34178209 | 7.141458473 | 2.3071 | 1.84E-05   |
| AT3G52370 | 54.26461779 | 11.04107067 | 2.2971 | 4.94E-08   |
| AT3G50060 | 96.2150258  | 19.59202752 | 2.296  | 7.84E-14   |
| AT1G30870 | 42.11459747 | 8.597940135 | 2.2923 | 2.38E-06   |
| AT4G30670 | 45.31629202 | 9.255706047 | 2.2916 | 8.68E-07   |
| AT1G70370 | 110.0069408 | 22.50499085 | 2.2893 | 1.05E-15   |
| AT5G44550 | 129.5044396 | 26.54555288 | 2.2865 | 2.23E-18   |
| AT1G64110 | 34.27455057 | 7.047491914 | 2.282  | 2.94E-05   |
| AT4G12880 | 141.0797968 | 29.08264997 | 2.2783 | 6.64E-20   |
| AT3G24300 | 86.5688948  | 17.85364618 | 2.2776 | 2.17E-12   |
| AT4G23490 | 23.39699859 | 4.839277781 | 2.2735 | 0.00089138 |
| AT5G61480 | 41.78621854 | 8.644923415 | 2.2731 | 2.98E-06   |
| AT5G58770 | 18.59445678 | 3.852628913 | 2.271  | 0.0039014  |
| AT3G45780 | 38.29719244 | 7.940174223 | 2.27   | 8.91E-06   |
| AT4G27657 | 51.18606535 | 10.61822115 | 2.2692 | 1.62E-07   |
| AT2G22990 | 36.45006097 | 7.564307988 | 2.2686 | 1.60E-05   |
| AT5G57150 | 47.9843708  | 9.960455239 | 2.2683 | 4.42E-07   |
| AT5G62710 | 23.23280913 | 4.839277781 | 2.2633 | 0.00097103 |
| AT2G47200 | 19.99006722 | 4.181511869 | 2.2572 | 0.0026704  |
| AT5G55730 | 34.80816633 | 7.282408311 | 2.2569 | 2.84E-05   |
| AT1G64390 | 121.6643927 | 25.51192073 | 2.2537 | 4.89E-17   |
| AT5G37550 | 45.23419728 | 9.490622444 | 2.2528 | 1.16E-06   |

|           |             |             |        |            |
|-----------|-------------|-------------|--------|------------|
| AT1G65560 | 44.04382367 | 9.255706047 | 2.2505 | 1.71E-06   |
| AT3G51860 | 69.78052212 | 14.70576646 | 2.2464 | 6.12E-10   |
| AT1G71870 | 25.40831953 | 5.356093855 | 2.246  | 0.0005354  |
| AT2G46430 | 23.60223542 | 4.980227619 | 2.2446 | 0.00092627 |
| AT1G72430 | 36.2858715  | 7.658274547 | 2.2443 | 1.92E-05   |
| AT1G32450 | 102.9057465 | 21.75325838 | 2.242  | 2.14E-14   |
| AT5G41140 | 61.98152259 | 13.10833496 | 2.2414 | 7.09E-09   |
| AT5G23020 | 227.8539284 | 48.25182797 | 2.2395 | 2.44E-31   |
| AT4G19810 | 52.49958106 | 11.13503722 | 2.2372 | 1.39E-07   |
| AT5G40890 | 192.0606253 | 40.78148654 | 2.2356 | 2.09E-26   |
| AT5G47060 | 30.29295608 | 6.436709282 | 2.2346 | 0.00012629 |
| AT3G50820 | 28.48687197 | 6.060843046 | 2.2327 | 0.00022232 |
| AT5G05500 | 21.63196186 | 4.604361384 | 2.2321 | 0.001762   |
| AT1G64590 | 48.76427076 | 10.38330475 | 2.2316 | 4.53E-07   |
| AT1G04280 | 86.36365797 | 18.41744554 | 2.2294 | 4.35E-12   |
| AT5G22940 | 25.03889323 | 5.356093855 | 2.2249 | 0.00064885 |
| AT5G67070 | 25.40831953 | 5.450060414 | 2.221  | 0.00058983 |
| AT3G23510 | 51.18606535 | 11.04107067 | 2.2129 | 2.51E-07   |
| AT2G16430 | 55.08556511 | 11.8867697  | 2.2123 | 7.70E-08   |
| AT1G13930 | 937.1934595 | 202.8268173 | 2.2081 | 3.43E-126  |
| AT1G50630 | 22.82233547 | 4.980227619 | 2.1962 | 0.0013833  |
| AT3G54390 | 21.50881976 | 4.698327943 | 2.1947 | 0.0020626  |
| AT4G32460 | 32.6737033  | 7.141458473 | 2.1938 | 7.44E-05   |
| AT2G35770 | 31.81170862 | 6.953525355 | 2.1937 | 9.63E-05   |
| AT2G44230 | 21.05729874 | 4.604361384 | 2.1932 | 0.0023665  |
| AT5G40730 | 57.54840707 | 12.59151889 | 2.1923 | 4.33E-08   |
| AT1G31050 | 32.63265593 | 7.141458473 | 2.192  | 7.59E-05   |
| AT1G18250 | 19.94901985 | 4.369444987 | 2.1908 | 0.0032791  |

|           |             |             |        |            |
|-----------|-------------|-------------|--------|------------|
| AT1G65985 | 38.78976083 | 8.503973576 | 2.1895 | 1.23E-05   |
| AT2G19130 | 39.85699234 | 8.738889974 | 2.1893 | 8.91E-06   |
| AT4G00430 | 132.3777552 | 29.08264997 | 2.1864 | 6.72E-18   |
| AT1G79040 | 155.4463749 | 34.15684414 | 2.1862 | 6.27E-21   |
| AT3G07340 | 33.12522433 | 7.282408311 | 2.1854 | 6.79E-05   |
| AT2G23610 | 59.19030171 | 13.0143684  | 2.1853 | 2.82E-08   |
| AT2G16750 | 66.66092231 | 14.65878318 | 2.1851 | 2.99E-09   |
| AT5G26280 | 800.5057309 | 176.1872979 | 2.1838 | 1.71E-106  |
| AT4G36180 | 51.80177584 | 11.4169369  | 2.1818 | 2.66E-07   |
| AT1G01750 | 35.95749258 | 7.940174223 | 2.179  | 3.03E-05   |
| AT5G38010 | 24.01270908 | 5.309110575 | 2.1773 | 0.0010397  |
| AT5G15910 | 59.6828701  | 13.20230152 | 2.1765 | 2.64E-08   |
| AT3G21510 | 262.9083789 | 58.16529993 | 2.1763 | 5.38E-35   |
| AT4G30450 | 38.87185556 | 8.644923415 | 2.1688 | 1.35E-05   |
| AT2G40460 | 50.48826013 | 11.22900378 | 2.1687 | 4.34E-07   |
| AT5G61640 | 38.2150977  | 8.503973576 | 2.1679 | 1.65E-05   |
| AT5G17010 | 156.9651274 | 35.14349301 | 2.1591 | 7.58E-21   |
| AT1G71960 | 24.9567985  | 5.591010252 | 2.1583 | 0.00084836 |
| AT4G16190 | 497.904549  | 111.6792552 | 2.1565 | 2.27E-65   |
| AT5G17160 | 31.31914022 | 7.047491914 | 2.1519 | 0.00013657 |
| AT5G66230 | 21.05729874 | 4.745311222 | 2.1497 | 0.0027015  |
| AT3G04720 | 120.2277349 | 27.15633551 | 2.1464 | 5.62E-16   |
| AT3G21260 | 37.64043458 | 8.503973576 | 2.1461 | 2.23E-05   |
| AT1G28400 | 304.6125028 | 68.87748764 | 2.1449 | 7.74E-40   |
| AT5G23750 | 27.83011412 | 6.295759443 | 2.1442 | 0.00039319 |
| AT4G17250 | 35.38282945 | 8.034140782 | 2.1388 | 4.47E-05   |
| AT2G39220 | 26.06507738 | 5.919893208 | 2.1385 | 0.00066777 |
| AT1G19715 | 29.75934032 | 6.765592238 | 2.1371 | 0.00023255 |

|           |             |             |        |            |
|-----------|-------------|-------------|--------|------------|
| AT2G13820 | 66.33254338 | 15.0816327  | 2.1369 | 5.38E-09   |
| AT3G52900 | 20.31844615 | 4.651344663 | 2.1271 | 0.0035661  |
| AT4G30190 | 1271.483208 | 291.2023659 | 2.1264 | 4.60E-164  |
| AT1G64640 | 49.62626544 | 11.36995362 | 2.1259 | 7.79E-07   |
| AT1G04220 | 75.56820072 | 17.33683011 | 2.1239 | 4.21E-10   |
| AT3G29410 | 29.22572456 | 6.718608958 | 2.121  | 0.00029134 |
| AT1G11545 | 50.20092856 | 11.55788674 | 2.1188 | 6.97E-07   |
| AT3G11720 | 27.74801939 | 6.389726002 | 2.1186 | 0.00044831 |
| AT5G21950 | 20.35949351 | 4.698327943 | 2.1155 | 0.003654   |
| AT5G41670 | 382.930877  | 88.51649844 | 2.1131 | 3.55E-49   |
| AT5G54510 | 29.02048773 | 6.718608958 | 2.1108 | 0.0003234  |
| AT1G31070 | 74.66515867 | 17.28984683 | 2.1105 | 6.39E-10   |
| AT3G03130 | 21.30358293 | 4.93324434  | 2.1105 | 0.0028533  |
| AT5G49300 | 21.0983461  | 4.88626106  | 2.1103 | 0.003024   |
| AT5G23730 | 31.23704549 | 7.235425032 | 2.1101 | 0.00017152 |
| AT4G24780 | 113.1265406 | 26.21666992 | 2.1094 | 8.98E-15   |
| AT5G12940 | 36.69634516 | 8.503973576 | 2.1094 | 3.60E-05   |
| AT4G34160 | 32.59160857 | 7.564307988 | 2.1072 | 0.00011775 |
| AT5G23010 | 46.75294982 | 10.85313755 | 2.1069 | 2.06E-06   |
| AT3G22600 | 311.3442708 | 72.44821688 | 2.1035 | 7.88E-40   |
| AT3G54580 | 605.3665531 | 141.3257045 | 2.0988 | 4.80E-77   |
| AT4G23500 | 28.97944036 | 6.765592238 | 2.0987 | 0.00034478 |
| AT5G42860 | 40.80108176 | 9.537605724 | 2.0969 | 1.20E-05   |
| AT2G16890 | 94.20370487 | 22.03515805 | 2.096  | 2.71E-12   |
| AT1G67360 | 126.9595029 | 29.928349   | 2.0848 | 2.60E-16   |
| AT3G20110 | 26.10612475 | 6.154809605 | 2.0846 | 0.00081583 |
| AT1G13300 | 62.35094889 | 14.70576646 | 2.084  | 2.90E-08   |
| AT5G60890 | 60.42172269 | 14.28291695 | 2.0808 | 5.19E-08   |

|           |             |             |        |            |
|-----------|-------------|-------------|--------|------------|
| AT5G16770 | 20.35949351 | 4.839277781 | 2.0728 | 0.0041711  |
| AT2G38170 | 36.49110833 | 8.691906694 | 2.0698 | 4.77E-05   |
| AT3G28050 | 46.46561826 | 11.08805394 | 2.0672 | 2.99E-06   |
| AT4G37800 | 68.79538534 | 16.4441478  | 2.0647 | 5.66E-09   |
| AT4G16260 | 125.1534188 | 29.928349   | 2.0641 | 6.54E-16   |
| AT2G18150 | 106.7231515 | 25.55890401 | 2.062  | 1.30E-13   |
| AT1G19050 | 26.27031421 | 6.295759443 | 2.061  | 0.00085577 |
| AT1G45130 | 114.8094826 | 27.53220174 | 2.06   | 1.34E-14   |
| AT5G05180 | 23.47909333 | 5.637993531 | 2.0581 | 0.0018747  |
| AT5G09760 | 28.36372988 | 6.812575517 | 2.0578 | 0.00048964 |
| AT3G62040 | 61.16057527 | 14.70576646 | 2.0562 | 5.33E-08   |
| AT5G11110 | 59.51868064 | 14.32990023 | 2.0543 | 8.57E-08   |
| AT5G16590 | 74.13154292 | 17.90062946 | 2.0501 | 1.51E-09   |
| AT5G58860 | 131.1463342 | 31.76069689 | 2.0459 | 1.76E-16   |
| AT4G24140 | 44.16696577 | 10.71218771 | 2.0437 | 6.63E-06   |
| AT4G12480 | 46.01409724 | 11.1820205  | 2.0409 | 4.07E-06   |
| AT5G54040 | 22.9044302  | 5.591010252 | 2.0344 | 0.0023849  |
| AT4G20820 | 33.86407691 | 8.269057179 | 2.034  | 0.00012046 |
| AT3G60330 | 28.65106144 | 7.000508635 | 2.0331 | 0.00050481 |
| AT5G60450 | 51.22711271 | 12.54453561 | 2.0298 | 1.06E-06   |
| AT4G29800 | 23.31490386 | 5.73196009  | 2.0242 | 0.0022139  |
| AT1G78580 | 52.54062842 | 12.92040184 | 2.0238 | 7.73E-07   |
| AT3G17609 | 53.07424418 | 13.06135168 | 2.0227 | 6.73E-07   |
| AT3G12610 | 50.36511803 | 12.40358577 | 2.0217 | 1.43E-06   |
| AT5G10170 | 95.76350477 | 23.67957283 | 2.0158 | 5.83E-12   |
| AT2G33620 | 35.62911365 | 8.832856532 | 2.0121 | 8.36E-05   |
| AT2G28160 | 28.36372988 | 7.047491914 | 2.0089 | 0.00060778 |
| AT1G72180 | 24.01270908 | 5.966876487 | 2.0088 | 0.0019464  |

|           |             |             |        |            |
|-----------|-------------|-------------|--------|------------|
| AT3G06125 | 35.54701892 | 8.832856532 | 2.0088 | 8.71E-05   |
| AT1G56320 | 24.38213538 | 6.060843046 | 2.0082 | 0.0017646  |
| AT1G06690 | 24.54632484 | 6.107826326 | 2.0068 | 0.0016983  |
| AT5G65390 | 95.88664687 | 23.86750595 | 2.0063 | 6.50E-12   |
| AT3G30180 | 21.50881976 | 5.356093855 | 2.0057 | 0.0037916  |
| AT3G16770 | 153.9276223 | 38.38533929 | 2.0036 | 8.34E-19   |
| AT5G46790 | 49.01055495 | 12.26263593 | 1.9988 | 2.47E-06   |
| AT1G12040 | 52.00701267 | 13.0143684  | 1.9986 | 1.10E-06   |
| AT3G63110 | 22.12453025 | 5.544026972 | 1.9966 | 0.0033267  |
| AT4G11320 | 727.7697984 | 182.6709904 | 1.9942 | 2.63E-87   |
| AT5G67210 | 26.35240894 | 6.624642399 | 1.992  | 0.0011054  |
| AT2G01830 | 89.52430515 | 22.69292396 | 1.98   | 5.42E-11   |
| AT1G60390 | 44.61848679 | 11.32297034 | 1.9784 | 9.26E-06   |
| AT1G70230 | 27.95325622 | 7.094475194 | 1.9782 | 0.00077086 |
| AT5G61820 | 231.4250493 | 58.77608256 | 1.9772 | 1.18E-27   |
| AT3G16420 | 2029.176536 | 516.2992576 | 1.9746 | 1.68E-240  |
| AT3G45650 | 50.89873379 | 12.96738512 | 1.9727 | 1.84E-06   |
| AT5G22740 | 174.6975895 | 44.58713218 | 1.9702 | 7.05E-21   |
| AT4G08930 | 40.96527122 | 10.47727131 | 1.9671 | 2.64E-05   |
| AT2G26980 | 62.80246991 | 16.11526484 | 1.9624 | 8.54E-08   |
| AT1G21440 | 64.40331718 | 16.53811436 | 1.9613 | 5.66E-08   |
| AT1G53830 | 33.61779272 | 8.644923415 | 1.9593 | 0.00019194 |
| AT3G23470 | 39.81594498 | 10.24235492 | 1.9588 | 3.76E-05   |
| AT3G26570 | 22.45290918 | 5.77894337  | 1.958  | 0.0034876  |
| AT5G52882 | 148.5504174 | 38.29137273 | 1.9559 | 1.12E-17   |
| AT3G57040 | 28.938393   | 7.470341429 | 1.9537 | 0.00066776 |
| AT1G08320 | 61.57104893 | 15.92733173 | 1.9507 | 1.33E-07   |
| AT3G11410 | 81.52006879 | 21.09549246 | 1.9502 | 6.94E-10   |

|           |             |             |        |            |
|-----------|-------------|-------------|--------|------------|
| AT2G27840 | 64.77274348 | 16.77303076 | 1.9492 | 5.81E-08   |
| AT1G80690 | 22.65814601 | 5.872909928 | 1.9479 | 0.0034254  |
| AT4G02330 | 38.78976083 | 10.0544218  | 1.9478 | 5.26E-05   |
| AT3G43960 | 27.46068782 | 7.141458473 | 1.9431 | 0.0010185  |
| AT5G53760 | 37.72252931 | 9.8195054   | 1.9417 | 7.20E-05   |
| AT5G63380 | 32.42741911 | 8.456990297 | 1.939  | 0.00029176 |
| AT5G03555 | 47.90227607 | 12.49755233 | 1.9384 | 5.23E-06   |
| AT5G42030 | 27.66592465 | 7.235425032 | 1.935  | 0.0010004  |
| AT4G36640 | 40.92422386 | 10.71218771 | 1.9337 | 3.31E-05   |
| AT4G22120 | 65.42950133 | 17.14889699 | 1.9318 | 5.87E-08   |
| AT3G45410 | 21.50881976 | 5.637993531 | 1.9317 | 0.0048676  |
| AT4G29720 | 27.41964046 | 7.188441752 | 1.9315 | 0.0010802  |
| AT3G61590 | 24.01270908 | 6.295759443 | 1.9313 | 0.0025921  |
| AT3G61820 | 72.16126935 | 18.93426161 | 1.9302 | 1.02E-08   |
| AT5G01340 | 33.28941379 | 8.738889974 | 1.9295 | 0.00024569 |
| AT2G26355 | 55.8244177  | 14.65878318 | 1.9291 | 7.26E-07   |
| AT1G11450 | 24.01270908 | 6.342742723 | 1.9206 | 0.0026926  |
| AT1G76790 | 152.7372487 | 40.40562031 | 1.9184 | 9.24E-18   |
| AT4G23670 | 1068.052462 | 283.0272753 | 1.916  | 3.83E-122  |
| AT1G75820 | 58.32830702 | 15.45749893 | 1.9159 | 4.29E-07   |
| AT3G16410 | 54.05938096 | 14.32990023 | 1.9155 | 1.30E-06   |
| AT4G04810 | 25.36727216 | 6.765592238 | 1.9067 | 0.0020316  |
| AT4G13550 | 30.29295608 | 8.081124062 | 1.9064 | 0.00059018 |
| AT3G45160 | 80.08341098 | 21.37739214 | 1.9054 | 1.81E-09   |
| AT4G13860 | 29.88248242 | 7.987157503 | 1.9035 | 0.00066275 |
| AT1G33560 | 69.00062217 | 18.46442882 | 1.9019 | 3.21E-08   |
| AT4G38080 | 312.5756918 | 83.77118722 | 1.8997 | 1.55E-35   |
| AT4G15390 | 180.9778365 | 48.72166077 | 1.8932 | 1.23E-20   |



|           |             |             |        |            |
|-----------|-------------|-------------|--------|------------|
| AT4G16890 | 24.42318274 | 6.57765912  | 1.8926 | 0.0027015  |
| AT3G06035 | 56.85060185 | 15.31654909 | 1.8921 | 7.80E-07   |
| AT2G22230 | 32.75579803 | 8.832856532 | 1.8908 | 0.00034397 |
| AT3G53510 | 54.83928092 | 14.79973302 | 1.8896 | 1.33E-06   |
| AT1G18880 | 77.90790058 | 21.04850918 | 1.8881 | 3.92E-09   |
| AT1G01610 | 105.8611568 | 28.75376701 | 1.8804 | 3.62E-12   |
| AT4G31840 | 26.80392997 | 7.282408311 | 1.88   | 0.001581   |
| AT4G27654 | 55.12661248 | 14.98766614 | 1.879  | 1.36E-06   |
| AT5G26260 | 461.6186775 | 125.5863059 | 1.878  | 1.28E-51   |
| AT1G80050 | 31.56542442 | 8.597940135 | 1.8763 | 0.00049681 |
| AT1G49860 | 80.53493201 | 21.94119149 | 1.876  | 2.35E-09   |
| AT1G59970 | 29.26677193 | 7.987157503 | 1.8735 | 0.00088294 |
| AT5G66040 | 228.592781  | 62.44077836 | 1.8722 | 1.26E-25   |
| AT1G65690 | 37.80462405 | 10.33632147 | 1.8708 | 0.00010848 |
| AT2G24270 | 32.63265593 | 8.926823091 | 1.8701 | 0.00039487 |
| AT1G05710 | 39.89803971 | 10.94710411 | 1.8658 | 6.65E-05   |
| AT3G20015 | 29.75934032 | 8.17509062  | 1.864  | 0.00081879 |
| AT5G10280 | 25.94193528 | 7.141458473 | 1.861  | 0.0021189  |
| AT4G31730 | 27.74801939 | 7.658274547 | 1.8573 | 0.0013783  |
| AT5G34940 | 30.29295608 | 8.363023738 | 1.8569 | 0.00074326 |
| AT5G46900 | 34.64397687 | 9.584589003 | 1.8538 | 0.00026356 |
| AT3G54810 | 234.9961701 | 65.11882529 | 1.8515 | 5.51E-26   |
| AT1G68850 | 48.47693919 | 13.43721792 | 1.8511 | 8.88E-06   |
| AT4G27595 | 30.66238237 | 8.503973576 | 1.8503 | 0.00070323 |
| AT5G36160 | 51.7196811  | 14.3768835  | 1.847  | 4.14E-06   |
| AT2G01890 | 86.6920369  | 24.24337218 | 1.8383 | 8.46E-10   |
| AT2G41820 | 39.98013444 | 11.1820205  | 1.8381 | 7.76E-05   |
| AT1G22550 | 49.99569173 | 14.00101727 | 1.8363 | 6.88E-06   |

|           |             |             |        |            |
|-----------|-------------|-------------|--------|------------|
| AT1G30270 | 152.3267751 | 42.66081772 | 1.8362 | 7.86E-17   |
| AT2G02680 | 41.58098171 | 11.6518533  | 1.8354 | 5.36E-05   |
| AT1G18980 | 23.2738565  | 6.53067584  | 1.8334 | 0.0044558  |
| AT1G18660 | 106.5179147 | 30.02231555 | 1.827  | 7.71E-12   |
| AT5G08330 | 34.06931374 | 9.631572283 | 1.8226 | 0.00035841 |
| AT5G66280 | 53.15633891 | 15.03464942 | 1.822  | 3.62E-06   |
| AT3G56240 | 245.8326747 | 69.58223683 | 1.8209 | 1.26E-26   |
| AT3G19030 | 320.1284071 | 90.77169585 | 1.8183 | 1.55E-34   |
| AT1G80870 | 25.49041426 | 7.235425032 | 1.8168 | 0.0028115  |
| AT1G78060 | 79.67293732 | 22.64594068 | 1.8148 | 6.36E-09   |
| AT3G19370 | 184.0974363 | 52.38635656 | 1.8132 | 6.14E-20   |
| AT3G27150 | 67.81024856 | 19.31012784 | 1.8121 | 1.17E-07   |
| AT5G40830 | 30.621335   | 8.738889974 | 1.809  | 0.00086603 |
| AT4G02970 | 60.70905425 | 17.33683011 | 1.8081 | 6.68E-07   |
| AT4G34260 | 55.9475598  | 16.02129828 | 1.8041 | 2.17E-06   |
| AT1G80280 | 38.05090824 | 10.90012083 | 1.8036 | 0.000154   |
| AT2G04780 | 114.2758668 | 32.74734576 | 1.8031 | 1.81E-12   |
| AT2G34420 | 25.57250899 | 7.329391591 | 1.8028 | 0.002916   |
| AT3G51950 | 162.4654745 | 46.65439647 | 1.8    | 1.68E-17   |
| AT5G25810 | 33.61779272 | 9.678555562 | 1.7964 | 0.00045926 |
| AT5G11790 | 137.9191496 | 39.84182095 | 1.7915 | 7.69E-15   |
| AT1G75780 | 70.56042208 | 20.39074327 | 1.7909 | 7.67E-08   |
| AT2G46680 | 40.80108176 | 11.79280314 | 1.7907 | 8.70E-05   |
| AT3G19680 | 151.3826856 | 43.83539971 | 1.788  | 3.28E-16   |
| AT3G16240 | 155.8978959 | 45.15093153 | 1.7878 | 1.12E-16   |
| AT1G53300 | 86.73308426 | 25.13605449 | 1.7868 | 1.74E-09   |
| AT3G28200 | 52.82795999 | 15.31654909 | 1.7862 | 5.29E-06   |
| AT2G18570 | 27.78906675 | 8.081124062 | 1.7819 | 0.0019161  |

|           |             |             |        |            |
|-----------|-------------|-------------|--------|------------|
| AT2G02130 | 368.6463936 | 107.5447266 | 1.7773 | 1.25E-38   |
| AT1G19230 | 26.92707207 | 7.893190944 | 1.7704 | 0.0024497  |
| AT5G05960 | 83.81872128 | 24.6662217  | 1.7647 | 4.68E-09   |
| AT3G26520 | 1014.157271 | 298.5317575 | 1.7643 | 5.87E-105  |
| AT5G07030 | 178.6381366 | 52.62127296 | 1.7633 | 1.01E-18   |
| AT5G56090 | 70.60146944 | 20.86057607 | 1.7589 | 1.10E-07   |
| AT5G62220 | 48.96950759 | 14.47085006 | 1.7587 | 1.64E-05   |
| AT5G17820 | 175.8879631 | 52.01049033 | 1.7578 | 2.25E-18   |
| AT5G20110 | 25.73669845 | 7.611291267 | 1.7576 | 0.0033703  |
| AT3G14680 | 85.41956855 | 25.27700433 | 1.7567 | 3.60E-09   |
| AT1G56010 | 38.37928717 | 11.36995362 | 1.7551 | 0.00019283 |
| AT2G05920 | 382.5204033 | 113.5585864 | 1.7521 | 2.25E-39   |
| AT1G63000 | 226.4172706 | 67.32703942 | 1.7497 | 2.12E-23   |
| AT4G13010 | 127.1647397 | 37.82153994 | 1.7494 | 2.46E-13   |
| AT1G04680 | 94.0395154  | 28.00203454 | 1.7477 | 5.59E-10   |
| AT5G08260 | 36.86053463 | 10.99408739 | 1.7453 | 0.00029073 |
| AT1G36160 | 825.6677662 | 246.3803173 | 1.7447 | 2.59E-84   |
| AT5G56530 | 40.96527122 | 12.26263593 | 1.7401 | 0.0001172  |
| AT1G25520 | 42.15564484 | 12.63850217 | 1.7379 | 9.06E-05   |
| AT5G04830 | 169.3203846 | 50.78892506 | 1.7372 | 1.85E-17   |
| AT3G61270 | 38.05090824 | 11.4169369  | 1.7368 | 0.00023375 |
| AT4G34610 | 27.05021416 | 8.128107341 | 1.7346 | 0.0027722  |
| AT4G23510 | 25.94193528 | 7.799224385 | 1.7339 | 0.0035436  |
| AT4G04640 | 27.50173519 | 8.269057179 | 1.7337 | 0.0025243  |
| AT5G60660 | 59.02611224 | 17.75967962 | 1.7327 | 2.07E-06   |
| AT1G23030 | 69.37004847 | 20.90755935 | 1.7303 | 2.01E-07   |
| AT2G01520 | 383.0950665 | 115.4849008 | 1.73   | 7.98E-39   |
| AT5G10430 | 171.0033266 | 51.58764081 | 1.7289 | 1.59E-17   |

|           |             |             |        |            |
|-----------|-------------|-------------|--------|------------|
| AT2G37180 | 125.3586556 | 37.86852322 | 1.727  | 5.98E-13   |
| AT4G26220 | 57.67154917 | 17.43079667 | 1.7262 | 2.99E-06   |
| AT1G55210 | 115.302051  | 34.90857661 | 1.7238 | 6.31E-12   |
| AT5G12420 | 112.1824512 | 34.01589431 | 1.7216 | 1.34E-11   |
| AT1G45201 | 113.4959669 | 34.43874382 | 1.7205 | 1.01E-11   |
| AT5G06390 | 96.95387839 | 29.4585162  | 1.7186 | 4.53E-10   |
| AT5G59050 | 26.51659841 | 8.081124062 | 1.7143 | 0.0033921  |
| AT1G30840 | 41.29365015 | 12.59151889 | 1.7135 | 0.00012993 |
| AT2G14890 | 315.3258653 | 96.45667267 | 1.7089 | 1.57E-31   |
| AT1G04250 | 122.0748664 | 37.39869042 | 1.7067 | 1.91E-12   |
| AT5G23920 | 31.27809286 | 9.584589003 | 1.7064 | 0.0012373  |
| AT3G57540 | 28.8152509  | 8.832856532 | 1.7059 | 0.0021424  |
| AT2G47400 | 87.18460529 | 26.73348599 | 1.7054 | 4.97E-09   |
| AT5G46110 | 26.22926685 | 8.081124062 | 1.6985 | 0.0038524  |
| AT2G24580 | 43.14078162 | 13.29626808 | 1.698  | 9.57E-05   |
| AT3G16180 | 30.45714554 | 9.396655886 | 1.6966 | 0.0015619  |
| AT4G14760 | 81.52006879 | 25.18303777 | 1.6947 | 2.03E-08   |
| AT1G20950 | 157.1703642 | 48.62769421 | 1.6925 | 9.78E-16   |
| AT4G01450 | 88.53916837 | 27.48521847 | 1.6877 | 4.75E-09   |
| AT3G63120 | 67.89234329 | 21.09549246 | 1.6863 | 4.57E-07   |
| AT1G33800 | 74.09049555 | 23.0687902  | 1.6833 | 1.23E-07   |
| AT1G41830 | 180.2389839 | 56.23898547 | 1.6803 | 8.13E-18   |
| AT1G64370 | 152.6962014 | 47.68802862 | 1.679  | 3.79E-15   |
| AT1G09560 | 508.4126747 | 158.8504677 | 1.6783 | 1.60E-49   |
| AT1G70850 | 1059.51461  | 331.23212   | 1.6775 | 5.56E-103  |
| AT1G44575 | 29.10258246 | 9.114756209 | 1.6749 | 0.0023251  |
| AT1G51850 | 42.81240269 | 13.4842012  | 1.6668 | 0.00012827 |
| AT1G77690 | 132.8703236 | 41.90908525 | 1.6647 | 4.21E-13   |

|           |             |             |        |            |
|-----------|-------------|-------------|--------|------------|
| AT5G58900 | 48.68217602 | 15.36353237 | 1.6639 | 3.71E-05   |
| AT2G47800 | 131.3926184 | 41.48623573 | 1.6632 | 5.99E-13   |
| AT3G27390 | 82.50520557 | 26.21666992 | 1.654  | 2.85E-08   |
| AT2G21050 | 30.8676192  | 9.8195054   | 1.6524 | 0.0017822  |
| AT3G49670 | 28.938393   | 9.208722768 | 1.6519 | 0.0026714  |
| AT3G11430 | 37.18891356 | 11.83978642 | 1.6512 | 0.00047385 |
| AT5G57350 | 56.35803346 | 17.94761274 | 1.6508 | 7.96E-06   |
| AT3G30875 | 29.0615351  | 9.255706047 | 1.6507 | 0.0026224  |
| AT2G30520 | 160.4131062 | 51.21177458 | 1.6472 | 1.58E-15   |
| AT5G18270 | 73.72106926 | 23.53862299 | 1.647  | 2.04E-07   |
| AT3G27060 | 38.2150977  | 12.21565265 | 1.6454 | 0.00039525 |
| AT5G44510 | 26.72183524 | 8.550956856 | 1.6439 | 0.0043845  |
| AT5G27420 | 74.62411131 | 23.91448923 | 1.6418 | 1.80E-07   |
| AT2G35840 | 39.69280288 | 12.73246872 | 1.6404 | 0.00029975 |
| AT1G63940 | 249.116464  | 79.91855831 | 1.6402 | 9.72E-24   |
| AT2G43360 | 74.74725341 | 24.00845579 | 1.6385 | 1.82E-07   |
| AT1G78100 | 55.7012756  | 17.90062946 | 1.6377 | 1.03E-05   |
| AT1G79270 | 192.7584305 | 62.06491212 | 1.6349 | 2.17E-18   |
| AT2G23540 | 157.0061748 | 50.55400866 | 1.6349 | 4.58E-15   |
| AT1G78340 | 65.51159607 | 21.09549246 | 1.6348 | 1.35E-06   |
| AT3G01860 | 27.95325622 | 9.02078965  | 1.6317 | 0.0035744  |
| AT4G00040 | 54.55194936 | 17.61872979 | 1.6305 | 1.41E-05   |
| AT2G30200 | 73.84421135 | 23.86750595 | 1.6294 | 2.47E-07   |
| AT2G28550 | 90.50944193 | 29.27058308 | 1.6286 | 7.29E-09   |
| AT2G36290 | 251.5382586 | 81.65693965 | 1.6231 | 1.18E-23   |
| AT5G27930 | 28.03535095 | 9.114756209 | 1.621  | 0.003688   |
| AT2G33850 | 45.80886041 | 14.89369958 | 1.6209 | 9.45E-05   |
| AT1G01630 | 77.41533219 | 25.18303777 | 1.6202 | 1.32E-07   |

|           |             |             |        |            |
|-----------|-------------|-------------|--------|------------|
| AT5G49990 | 29.02048773 | 9.443639165 | 1.6197 | 0.0030453  |
| AT5G61030 | 72.32545881 | 23.53862299 | 1.6195 | 3.82E-07   |
| AT3G03520 | 73.10535877 | 23.86750595 | 1.6149 | 3.43E-07   |
| AT5G02270 | 604.01199   | 197.235807  | 1.6147 | 5.23E-56   |
| AT2G43800 | 37.31205565 | 12.21565265 | 1.6109 | 0.00058946 |
| AT2G18980 | 96.78968892 | 31.71371361 | 1.6097 | 2.65E-09   |
| AT3G12110 | 53.19738628 | 17.43079667 | 1.6097 | 2.24E-05   |
| AT3G26650 | 76.84066907 | 25.27700433 | 1.604  | 1.80E-07   |
| AT4G02280 | 63.82865406 | 21.0015259  | 1.6037 | 2.67E-06   |
| AT2G33480 | 30.94971393 | 10.19537164 | 1.602  | 0.0022505  |
| AT4G30020 | 59.51868064 | 19.68599408 | 1.5962 | 6.91E-06   |
| AT1G78140 | 30.8676192  | 10.24235492 | 1.5915 | 0.0024099  |
| AT2G46535 | 51.63758637 | 17.14889699 | 1.5903 | 3.65E-05   |
| AT2G35380 | 49.74940754 | 16.53811436 | 1.5889 | 5.39E-05   |
| AT2G36080 | 27.41964046 | 9.114756209 | 1.5889 | 0.004834   |
| AT1G68560 | 127.7394029 | 42.51986788 | 1.587  | 6.62E-12   |
| AT5G24030 | 39.36442395 | 13.10833496 | 1.5864 | 0.00045221 |
| AT5G59090 | 236.55597   | 78.7909596  | 1.5861 | 1.26E-21   |
| AT4G40060 | 119.2425981 | 39.84182095 | 1.5815 | 4.25E-11   |
| AT4G34138 | 177.4067157 | 59.3868652  | 1.5788 | 3.01E-16   |
| AT4G27860 | 88.86754729 | 29.78739916 | 1.577  | 2.23E-08   |
| AT2G23340 | 35.83435048 | 12.02771953 | 1.575  | 0.00097307 |
| AT3G02230 | 381.1658403 | 127.9354699 | 1.575  | 2.36E-34   |
| AT4G23400 | 176.3805315 | 59.19893208 | 1.575  | 4.14E-16   |
| AT2G04160 | 44.78267626 | 15.03464942 | 1.5746 | 0.00016452 |
| AT4G36190 | 28.938393   | 9.725538842 | 1.5731 | 0.0038282  |
| AT2G44940 | 37.96881351 | 12.779452   | 1.571  | 0.000658   |
| AT3G16430 | 129.9149133 | 43.78841643 | 1.5689 | 6.27E-12   |

|           |             |             |        |            |
|-----------|-------------|-------------|--------|------------|
| AT5G57070 | 75.19877443 | 25.37097089 | 1.5675 | 3.98E-07   |
| AT1G36060 | 34.23350321 | 11.55788674 | 1.5665 | 0.0014019  |
| AT4G39350 | 190.2545412 | 64.36709282 | 1.5635 | 3.50E-17   |
| AT4G37150 | 43.83858684 | 14.8467163  | 1.5621 | 0.00021883 |
| AT4G25630 | 166.0365953 | 56.23898547 | 1.5619 | 4.97E-15   |
| AT5G02480 | 162.0960482 | 54.97043693 | 1.5601 | 1.15E-14   |
| AT5G55550 | 36.94262936 | 12.54453561 | 1.5582 | 0.00086442 |
| AT1G31770 | 61.94047523 | 21.09549246 | 1.5539 | 6.46E-06   |
| AT3G15020 | 41.74517118 | 14.23593367 | 1.5521 | 0.00035371 |
| AT2G36380 | 340.0774269 | 116.1426667 | 1.55   | 4.61E-30   |
| AT1G61580 | 59.559728   | 20.34375999 | 1.5498 | 1.08E-05   |
| AT4G34620 | 99.00624669 | 33.82796119 | 1.5493 | 4.49E-09   |
| AT5G42825 | 35.46492419 | 12.12168609 | 1.5488 | 0.0012154  |
| AT4G31920 | 43.79753947 | 14.98766614 | 1.5471 | 0.0002457  |
| AT2G29750 | 59.02611224 | 20.20281015 | 1.5468 | 1.23E-05   |
| AT5G65310 | 195.5496514 | 66.99815646 | 1.5453 | 2.17E-17   |
| AT3G14350 | 107.338862  | 36.88187435 | 1.5412 | 9.91E-10   |
| AT5G25220 | 35.99853994 | 12.40358577 | 1.5372 | 0.0011731  |
| AT5G66052 | 46.54771299 | 16.06828156 | 1.5345 | 0.00015659 |
| AT4G00030 | 32.63265593 | 11.27598706 | 1.5331 | 0.002303   |
| AT5G63800 | 38.3382398  | 13.2492848  | 1.5329 | 0.00077024 |
| AT3G21190 | 58.04097546 | 20.1088436  | 1.5292 | 1.77E-05   |
| AT4G22130 | 74.50096921 | 25.84080369 | 1.5276 | 7.46E-07   |
| AT4G01660 | 95.14779429 | 33.02924544 | 1.5264 | 1.37E-08   |
| AT3G24190 | 115.8356667 | 40.21768719 | 1.5262 | 2.47E-10   |
| AT1G28290 | 810.726525  | 281.7117434 | 1.525  | 8.00E-70   |
| AT4G29270 | 78.68780054 | 27.34426863 | 1.5249 | 3.43E-07   |
| AT1G30120 | 155.4874222 | 54.1247379  | 1.5224 | 1.17E-13   |

|           |             |             |        |            |
|-----------|-------------|-------------|--------|------------|
| AT1G56550 | 33.86407691 | 11.79280314 | 1.5218 | 0.0019373  |
| AT5G10480 | 92.68495233 | 32.27751297 | 1.5218 | 2.39E-08   |
| AT3G52960 | 97.65168361 | 34.01589431 | 1.5214 | 9.09E-09   |
| AT1G66400 | 44.08487104 | 15.36353237 | 1.5208 | 0.00028066 |
| AT5G13650 | 183.4817258 | 64.03820986 | 1.5186 | 5.44E-16   |
| AT2G40080 | 234.9551227 | 82.07978916 | 1.5173 | 2.55E-20   |
| AT5G60120 | 49.05160232 | 17.19588027 | 1.5122 | 0.00011518 |
| AT1G47670 | 54.18252306 | 19.02822817 | 1.5097 | 4.44E-05   |
| AT2G17630 | 32.50951384 | 11.4169369  | 1.5097 | 0.0026575  |
| AT1G22440 | 164.3126059 | 57.7894337  | 1.5076 | 3.13E-14   |
| AT1G34000 | 33.69988745 | 11.8867697  | 1.5034 | 0.0022054  |
| AT5G65640 | 66.00416446 | 23.3037066  | 1.502  | 5.08E-06   |
| AT5G59450 | 54.75718619 | 19.35711112 | 1.5002 | 4.34E-05   |
| AT2G43290 | 113.0444458 | 39.98277079 | 1.4994 | 7.01E-10   |
| AT3G55360 | 84.06500548 | 29.83438244 | 1.4945 | 1.84E-07   |
| AT1G14480 | 47.65599187 | 16.91398059 | 1.4944 | 0.00017302 |
| AT1G29025 | 38.42033453 | 13.67213431 | 1.4906 | 0.00098334 |
| AT5G54770 | 81.56111615 | 29.08264997 | 1.4877 | 3.24E-07   |
| AT2G39890 | 32.38637174 | 11.55788674 | 1.4865 | 0.0030586  |
| AT1G12140 | 68.05653275 | 24.29035546 | 1.4864 | 4.11E-06   |
| AT1G65510 | 33.69988745 | 12.02771953 | 1.4864 | 0.0024171  |
| AT3G26770 | 36.32691887 | 12.96738512 | 1.4862 | 0.001489   |
| AT5G40240 | 33.65884008 | 12.02771953 | 1.4846 | 0.002456   |
| AT1G15290 | 42.03250274 | 15.03464942 | 1.4832 | 0.00053389 |
| AT4G35300 | 76.18391121 | 27.25030207 | 1.4832 | 9.39E-07   |
| AT3G54260 | 55.37289667 | 19.8739272  | 1.4783 | 4.70E-05   |
| AT3G49780 | 223.0103392 | 80.05950814 | 1.478  | 1.13E-18   |
| AT1G18670 | 32.30427701 | 11.60487002 | 1.477  | 0.0032587  |



|           |             |             |        |            |
|-----------|-------------|-------------|--------|------------|
| AT5G66310 | 34.93130843 | 12.59151889 | 1.4721 | 0.0020928  |
| AT5G62440 | 56.93269658 | 20.53169311 | 1.4714 | 3.76E-05   |
| AT5G39850 | 30.33400344 | 10.94710411 | 1.4704 | 0.0048146  |
| AT2G48030 | 39.77489761 | 14.3768835  | 1.4681 | 0.00088467 |
| AT5G44400 | 73.14640613 | 26.45158632 | 1.4674 | 2.01E-06   |
| AT5G63760 | 32.71475067 | 11.83978642 | 1.4663 | 0.0031975  |
| AT2G24570 | 58.61563858 | 21.2364423  | 1.4647 | 2.94E-05   |
| AT4G17770 | 45.60362358 | 16.53811436 | 1.4634 | 0.00032125 |
| AT1G58080 | 84.72176333 | 30.72706475 | 1.4632 | 2.52E-07   |
| AT1G11840 | 548.8443302 | 199.2560881 | 1.4618 | 8.35E-45   |
| AT4G13290 | 36.61425043 | 13.29626808 | 1.4614 | 0.0016399  |
| AT1G52280 | 45.27524465 | 16.4441478  | 1.4611 | 0.000346   |
| AT2G46650 | 64.11598562 | 23.3037066  | 1.4601 | 1.12E-05   |
| AT1G07870 | 47.65599187 | 17.33683011 | 1.4588 | 0.00022956 |
| AT1G27930 | 38.17405034 | 14.00101727 | 1.4471 | 0.0013477  |
| AT5G57740 | 39.85699234 | 14.65878318 | 1.4431 | 0.0010237  |
| AT5G62020 | 46.34247616 | 17.05493043 | 1.4421 | 0.00032888 |
| AT4G39955 | 56.0707019  | 20.67264295 | 1.4395 | 5.88E-05   |
| AT5G10100 | 42.52507113 | 15.69241533 | 1.4382 | 0.00066465 |
| AT5G45100 | 37.68148195 | 13.90705071 | 1.438  | 0.0015576  |
| AT5G47560 | 65.3474066  | 24.14940563 | 1.4361 | 1.16E-05   |
| AT1G77510 | 71.54555886 | 26.45158632 | 1.4355 | 3.89E-06   |
| AT1G76930 | 834.9444709 | 309.1499786 | 1.4334 | 2.49E-66   |
| AT2G36830 | 588.9065594 | 218.0963831 | 1.4331 | 7.70E-47   |
| AT3G52430 | 102.0847991 | 37.82153994 | 1.4325 | 1.73E-08   |
| AT3G54400 | 76.75857434 | 28.47186733 | 1.4308 | 1.64E-06   |
| AT2G36910 | 156.0620854 | 57.97736681 | 1.4286 | 1.19E-12   |
| AT2G24300 | 34.11036111 | 12.68548545 | 1.427  | 0.0030885  |

|           |             |             |        |            |
|-----------|-------------|-------------|--------|------------|
| AT5G21020 | 266.5205472 | 99.46360255 | 1.422  | 3.77E-21   |
| AT2G27000 | 36.61425043 | 13.67213431 | 1.4212 | 0.0020818  |
| AT2G21970 | 90.6736314  | 33.87494447 | 1.4205 | 1.60E-07   |
| AT1G54030 | 99.58090981 | 37.21075731 | 1.4201 | 3.31E-08   |
| AT1G06430 | 78.31837424 | 29.27058308 | 1.4199 | 1.42E-06   |
| AT1G23330 | 50.61140222 | 18.93426161 | 1.4185 | 0.00018637 |
| AT4G37540 | 60.99638581 | 22.8338738  | 1.4175 | 3.04E-05   |
| AT3G55230 | 59.19030171 | 22.22309117 | 1.4133 | 4.35E-05   |
| AT5G66570 | 62.43304362 | 23.49163971 | 1.4102 | 2.55E-05   |
| AT5G27950 | 68.38491168 | 25.74683713 | 1.4093 | 9.12E-06   |
| AT1G30400 | 336.6294482 | 126.8548545 | 1.408  | 2.81E-26   |
| AT4G04830 | 300.1383399 | 113.1357369 | 1.4076 | 1.82E-23   |
| AT2G26900 | 56.93269658 | 21.4713587  | 1.4068 | 6.82E-05   |
| AT2G45970 | 43.42811318 | 16.39716452 | 1.4052 | 0.00071201 |
| AT3G62830 | 334.700222  | 126.5259715 | 1.4034 | 5.04E-26   |
| AT4G14130 | 87.59507895 | 33.123212   | 1.403  | 3.53E-07   |
| AT2G04030 | 177.5709051 | 67.23307286 | 1.4012 | 5.58E-14   |
| AT1G66200 | 771.4031484 | 292.3769479 | 1.3997 | 2.08E-59   |
| AT1G10120 | 62.84351728 | 23.82052267 | 1.3996 | 2.65E-05   |
| AT5G49810 | 144.5277755 | 54.87647037 | 1.3971 | 1.98E-11   |
| AT5G20960 | 423.649864  | 161.246615  | 1.3936 | 1.45E-32   |
| AT1G19140 | 56.89164921 | 21.65929182 | 1.3932 | 7.78E-05   |
| AT1G67730 | 138.3706706 | 52.80920608 | 1.3897 | 6.83E-11   |
| AT3G08030 | 94.08056277 | 35.98919204 | 1.3863 | 1.48E-07   |
| AT1G47480 | 59.8060122  | 22.92784036 | 1.3832 | 5.23E-05   |
| AT3G05490 | 126.4258871 | 48.53372765 | 1.3812 | 6.45E-10   |
| AT3G56370 | 47.94332344 | 18.41744554 | 1.3803 | 0.00039936 |
| AT1G69252 | 58.53354385 | 22.55197413 | 1.376  | 6.93E-05   |

|           |             |             |        |            |
|-----------|-------------|-------------|--------|------------|
| AT5G24165 | 69.53423793 | 26.82745255 | 1.374  | 1.12E-05   |
| AT5G08710 | 35.05445053 | 13.53118448 | 1.3733 | 0.0035315  |
| AT3G18130 | 102.1258465 | 39.46595472 | 1.3717 | 4.78E-08   |
| AT4G31990 | 167.7605847 | 64.83692561 | 1.3715 | 7.07E-13   |
| AT2G30970 | 89.03173676 | 34.43874382 | 1.3703 | 4.42E-07   |
| AT5G63590 | 34.4797874  | 13.34325136 | 1.3696 | 0.0039587  |
| AT1G20225 | 68.22072222 | 26.45158632 | 1.3669 | 1.51E-05   |
| AT1G64330 | 89.72954198 | 34.81461006 | 1.3659 | 4.19E-07   |
| AT5G49350 | 37.35310302 | 14.51783334 | 1.3634 | 0.0025828  |
| AT1G05570 | 276.5361044 | 107.5917099 | 1.3619 | 9.70E-21   |
| AT5G53460 | 1223.539884 | 476.175537  | 1.3615 | 9.10E-91   |
| AT2G16400 | 41.49888698 | 16.16224812 | 1.3604 | 0.0013304  |
| AT5G12900 | 49.7904549  | 19.4040944  | 1.3595 | 0.00034651 |
| AT5G54160 | 383.5876349 | 149.5007951 | 1.3594 | 1.47E-28   |
| AT4G21960 | 1453.815607 | 566.9472329 | 1.3586 | 1.65E-107  |
| AT3G01220 | 35.17759262 | 13.71911759 | 1.3585 | 0.0037603  |
| AT4G20260 | 650.6007504 | 253.897642  | 1.3575 | 3.74E-48   |
| AT4G30080 | 39.93908708 | 15.59844877 | 1.3564 | 0.0017713  |
| AT4G29100 | 71.05299047 | 27.81410142 | 1.3531 | 1.10E-05   |
| AT5G07580 | 76.51229014 | 29.97533227 | 1.3519 | 4.54E-06   |
| AT4G03200 | 59.6828701  | 23.39767315 | 1.351  | 7.27E-05   |
| AT1G50750 | 46.71190246 | 18.32347898 | 1.3501 | 0.00061581 |
| AT3G56170 | 46.1782867  | 18.13554586 | 1.3484 | 0.00067851 |
| AT5G03190 | 37.31205565 | 14.65878318 | 1.3479 | 0.0028423  |
| AT1G20560 | 44.1259184  | 17.33683011 | 1.3478 | 0.00094607 |
| AT3G55010 | 47.82018134 | 18.79331177 | 1.3474 | 0.00052505 |
| AT2G16720 | 35.25968736 | 13.90705071 | 1.3422 | 0.0040663  |
| AT1G17220 | 72.32545881 | 28.56583389 | 1.3402 | 1.04E-05   |

|           |             |             |        |            |
|-----------|-------------|-------------|--------|------------|
| AT4G13930 | 567.110408  | 224.2511927 | 1.3385 | 3.26E-41   |
| AT5G10580 | 70.10890105 | 27.81410142 | 1.3338 | 1.60E-05   |
| AT5G24660 | 63.82865406 | 25.32398761 | 1.3337 | 4.43E-05   |
| AT2G03480 | 39.77489761 | 15.83336517 | 1.3289 | 0.0021656  |
| AT5G01890 | 75.2398218  | 29.97533227 | 1.3277 | 7.49E-06   |
| AT5G37790 | 46.1782867  | 18.41744554 | 1.3261 | 0.0007975  |
| AT2G46700 | 45.39838675 | 18.13554586 | 1.3238 | 0.00091731 |
| AT2G46750 | 120.3098296 | 48.06389485 | 1.3237 | 5.64E-09   |
| AT1G04040 | 120.4329717 | 48.25182797 | 1.3196 | 5.99E-09   |
| AT4G29700 | 63.86970143 | 25.60588729 | 1.3187 | 5.12E-05   |
| AT5G65970 | 56.68641238 | 22.73990724 | 1.3178 | 0.00016187 |
| AT3G61380 | 40.5137502  | 16.25621468 | 1.3174 | 0.0020775  |
| AT3G02910 | 126.3437924 | 50.74194178 | 1.3161 | 2.51E-09   |
| AT2G34710 | 69.53423793 | 27.95505126 | 1.3146 | 2.19E-05   |
| AT1G28580 | 148.0988964 | 59.66876487 | 1.3115 | 8.49E-11   |
| AT4G24240 | 54.38775989 | 21.94119149 | 1.3096 | 0.00025217 |
| AT1G64440 | 47.94332344 | 19.35711112 | 1.3085 | 0.00069157 |
| AT3G26590 | 36.98367673 | 14.94068286 | 1.3076 | 0.0037825  |
| AT2G45400 | 102.4542254 | 41.39226918 | 1.3075 | 1.33E-07   |
| AT4G37300 | 103.6035517 | 41.86210197 | 1.3074 | 1.11E-07   |
| AT2G02120 | 47.20447085 | 19.12219473 | 1.3037 | 0.00080334 |
| AT4G35040 | 64.32122245 | 26.07572008 | 1.3026 | 5.62E-05   |
| AT3G63200 | 108.1598093 | 43.88238299 | 1.3015 | 5.98E-08   |
| AT3G16470 | 328.6662592 | 133.3855303 | 1.301  | 3.85E-23   |
| AT1G76090 | 129.1350133 | 52.43333984 | 1.3003 | 2.25E-09   |
| AT3G46290 | 52.66377052 | 21.42437542 | 1.2976 | 0.00036519 |
| AT1G43710 | 163.5737533 | 66.76324007 | 1.2928 | 1.18E-11   |
| AT3G52500 | 49.29788651 | 20.20281015 | 1.287  | 0.0006655  |

|           |             |             |        |            |
|-----------|-------------|-------------|--------|------------|
| AT5G48300 | 49.83150227 | 20.43772655 | 1.2858 | 0.00061961 |
| AT3G23090 | 83.73662655 | 34.39176054 | 1.2838 | 3.49E-06   |
| AT1G75270 | 121.1718243 | 49.80227619 | 1.2828 | 1.10E-08   |
| AT4G01480 | 150.2333594 | 61.78301245 | 1.2819 | 1.25E-10   |
| AT5G26820 | 63.82865406 | 26.2636532  | 1.2811 | 7.57E-05   |
| AT3G06390 | 38.91290293 | 16.02129828 | 1.2803 | 0.0033292  |
| AT5G57685 | 82.9567266  | 34.20382742 | 1.2782 | 4.23E-06   |
| AT1G27200 | 47.04028139 | 19.4040944  | 1.2775 | 0.00099994 |
| AT4G14960 | 485.220913  | 200.2427369 | 1.2769 | 3.57E-33   |
| AT5G03300 | 203.5949351 | 84.10007018 | 1.2755 | 3.93E-14   |
| AT5G40910 | 60.25753322 | 24.94812138 | 1.2722 | 0.00014312 |
| AT4G30460 | 101.4280413 | 42.00305181 | 1.2719 | 2.79E-07   |
| AT1G37130 | 354.8544787 | 147.0576646 | 1.2708 | 3.44E-24   |
| AT1G15210 | 234.7498859 | 97.44332153 | 1.2685 | 4.10E-16   |
| AT4G26130 | 45.80886041 | 19.02822817 | 1.2675 | 0.0012951  |
| AT1G21310 | 6046.277005 | 2519.854226 | 1.2627 | 0          |
| AT1G64950 | 75.81448492 | 31.61974705 | 1.2616 | 1.54E-05   |
| AT3G23640 | 89.31906832 | 37.25774059 | 1.2614 | 2.05E-06   |
| AT3G03780 | 507.0170643 | 211.6126905 | 1.2606 | 4.64E-34   |
| AT5G10770 | 77.74371112 | 32.51242936 | 1.2577 | 1.21E-05   |
| AT5G37770 | 215.9091449 | 90.30186306 | 1.2576 | 1.09E-14   |
| AT3G24503 | 418.149517  | 174.9187493 | 1.2573 | 4.85E-28   |
| AT5G20070 | 122.1569611 | 51.21177458 | 1.2542 | 1.67E-08   |
| AT4G12390 | 43.71544474 | 18.37046226 | 1.2508 | 0.0020009  |
| AT4G30440 | 312.2062655 | 131.2712827 | 1.2499 | 7.32E-21   |
| AT3G12700 | 86.60994217 | 36.50600812 | 1.2464 | 3.79E-06   |
| AT3G22850 | 167.2680163 | 70.61586898 | 1.2441 | 2.51E-11   |
| AT2G46890 | 39.15918712 | 16.53811436 | 1.2436 | 0.004019   |

|           |             |             |        |            |
|-----------|-------------|-------------|--------|------------|
| AT2G41220 | 395.7787025 | 167.636341  | 1.2394 | 4.77E-26   |
| AT3G15820 | 71.1350852  | 30.16326539 | 1.2378 | 4.08E-05   |
| AT2G26730 | 70.14994842 | 29.78739916 | 1.2357 | 4.81E-05   |
| AT5G44480 | 49.21579178 | 20.90755935 | 1.2351 | 0.0010028  |
| AT1G44170 | 115.4662404 | 49.097527   | 1.2337 | 6.71E-08   |
| AT3G21690 | 137.3034391 | 58.40021633 | 1.2333 | 2.75E-09   |
| AT3G19170 | 139.3558074 | 59.33988192 | 1.2317 | 2.12E-09   |
| AT3G27300 | 96.2150258  | 40.96941966 | 1.2317 | 1.15E-06   |
| AT3G55340 | 41.70412381 | 17.75967962 | 1.2316 | 0.0030218  |
| AT1G53240 | 225.3910865 | 96.08080643 | 1.2301 | 7.12E-15   |
| AT3G06930 | 38.54347663 | 16.4441478  | 1.2289 | 0.0048146  |
| AT5G15350 | 199.2439143 | 85.08671904 | 1.2275 | 3.66E-13   |
| AT1G26450 | 40.3906081  | 17.28984683 | 1.2241 | 0.0038056  |
| AT2G37170 | 563.9497609 | 241.7289727 | 1.2222 | 2.66E-36   |
| AT2G40840 | 75.97867438 | 32.60639592 | 1.2204 | 2.49E-05   |
| AT3G19710 | 76.75857434 | 33.02924544 | 1.2166 | 2.33E-05   |
| AT3G23600 | 284.1298671 | 122.2974764 | 1.2162 | 2.38E-18   |
| AT1G80270 | 44.94686572 | 19.35711112 | 1.2154 | 0.002143   |
| AT5G67470 | 65.42950133 | 28.23695094 | 1.2124 | 0.0001224  |
| AT2G39900 | 55.9475598  | 24.14940563 | 1.2121 | 0.00047039 |
| AT1G35320 | 44.29010787 | 19.12219473 | 1.2117 | 0.0024099  |
| AT5G42180 | 45.48048148 | 19.6390108  | 1.2115 | 0.002048   |
| AT3G05890 | 146.3338596 | 63.19251083 | 1.2114 | 1.23E-09   |
| AT2G28720 | 59.88810693 | 25.88778696 | 1.21   | 0.00027619 |
| AT1G51070 | 152.4909645 | 66.05849088 | 1.2069 | 5.71E-10   |
| AT1G60950 | 76.67647961 | 33.21717856 | 1.2069 | 2.65E-05   |
| AT4G15920 | 57.6305018  | 24.99510466 | 1.2052 | 0.00039525 |
| AT1G64650 | 85.83004221 | 37.25774059 | 1.2039 | 7.54E-06   |

|           |             |             |        |            |
|-----------|-------------|-------------|--------|------------|
| AT3G28550 | 989.4467564 | 429.6151071 | 1.2036 | 3.36E-62   |
| AT5G56540 | 98.88310459 | 42.9427174  | 1.2033 | 1.23E-06   |
| AT5G61790 | 458.3348883 | 199.2091048 | 1.2021 | 6.63E-29   |
| AT3G22240 | 71.21717993 | 30.96198114 | 1.2017 | 6.06E-05   |
| AT1G06550 | 344.1411162 | 149.6887283 | 1.201  | 9.29E-22   |
| AT4G20270 | 66.94825387 | 29.17661652 | 1.1982 | 0.0001146  |
| AT3G29360 | 203.7180772 | 88.79839812 | 1.198  | 5.04E-13   |
| AT3G58550 | 60.99638581 | 26.63951944 | 1.1952 | 0.00027288 |
| AT1G30690 | 156.9651274 | 68.59558796 | 1.1943 | 4.16E-10   |
| AT3G05165 | 159.1406378 | 69.58223683 | 1.1935 | 3.11E-10   |
| AT4G09670 | 53.44367047 | 23.39767315 | 1.1917 | 0.00078923 |
| AT4G16340 | 126.7132187 | 55.53423628 | 1.1901 | 3.13E-08   |
| AT4G26010 | 58.32830702 | 25.60588729 | 1.1877 | 0.00042082 |
| AT4G24830 | 89.89373144 | 39.512938   | 1.1859 | 5.53E-06   |
| AT5G37990 | 141.777602  | 62.3468118  | 1.1852 | 4.28E-09   |
| AT5G35970 | 67.19453807 | 29.55248276 | 1.1851 | 0.00012746 |
| AT5G26780 | 87.47193685 | 38.47930585 | 1.1847 | 7.83E-06   |
| AT5G56000 | 67.85129592 | 29.88136572 | 1.1831 | 0.00011884 |
| AT1G74030 | 197.3146881 | 86.91906694 | 1.1828 | 2.03E-12   |
| AT1G54000 | 275.6741098 | 121.4987606 | 1.182  | 3.67E-17   |
| AT1G14210 | 47.32761295 | 20.86057607 | 1.1819 | 0.0019706  |
| AT5G42270 | 196.0011724 | 86.40225087 | 1.1817 | 2.51E-12   |
| AT1G12000 | 237.007491  | 104.5377967 | 1.1809 | 8.51E-15   |
| AT3G23490 | 76.55333751 | 33.78097791 | 1.1803 | 3.73E-05   |
| AT1G78290 | 101.6743255 | 44.86903185 | 1.1802 | 1.20E-06   |
| AT4G06744 | 143.009023  | 63.19251083 | 1.1783 | 4.24E-09   |
| AT3G28860 | 145.0203439 | 64.08519314 | 1.1782 | 3.21E-09   |
| AT1G33170 | 44.08487104 | 19.49806096 | 1.177  | 0.0031326  |

|           |             |             |        |            |
|-----------|-------------|-------------|--------|------------|
| AT3G25530 | 82.01263718 | 36.27109172 | 1.177  | 1.84E-05   |
| AT1G19700 | 44.45429733 | 19.68599408 | 1.1752 | 0.0030231  |
| AT3G44320 | 149.0429858 | 66.15245743 | 1.1719 | 2.15E-09   |
| AT2G05990 | 156.1852275 | 69.39430371 | 1.1704 | 8.41E-10   |
| AT4G34135 | 83.49034235 | 37.11679075 | 1.1695 | 1.66E-05   |
| AT5G09870 | 186.2729467 | 83.01945475 | 1.1659 | 1.55E-11   |
| AT3G15530 | 84.02395811 | 37.49265698 | 1.1642 | 1.66E-05   |
| AT5G28540 | 523.9696264 | 233.8357817 | 1.164  | 1.35E-31   |
| AT5G48560 | 87.26670002 | 38.94913865 | 1.1638 | 1.08E-05   |
| AT2G30860 | 1041.617958 | 465.2284329 | 1.1628 | 1.83E-62   |
| AT2G43710 | 100.4839519 | 44.91601513 | 1.1617 | 1.91E-06   |
| AT5G23890 | 185.5340941 | 82.97247147 | 1.161  | 1.98E-11   |
| AT5G02050 | 66.66092231 | 29.83438244 | 1.1599 | 0.00017941 |
| AT5G64030 | 97.61063624 | 43.69444987 | 1.1596 | 2.89E-06   |
| AT4G17520 | 310.1128498 | 138.882574  | 1.1589 | 9.75E-19   |
| AT4G13660 | 113.7832984 | 51.02384146 | 1.157  | 3.45E-07   |
| AT1G62800 | 56.85060185 | 25.51192073 | 1.156  | 0.00068195 |
| AT1G35720 | 1122.686506 | 504.0366217 | 1.1554 | 1.01E-66   |
| AT4G19120 | 95.02465219 | 42.66081772 | 1.1554 | 4.33E-06   |
| AT2G05940 | 164.887269  | 74.13961494 | 1.1532 | 4.04E-10   |
| AT2G45470 | 70.31413788 | 31.71371361 | 1.1487 | 0.00012438 |
| AT1G74770 | 78.85199    | 35.56634253 | 1.1486 | 4.04E-05   |
| AT3G60750 | 434.3221792 | 196.2961414 | 1.1457 | 1.10E-25   |
| AT5G47870 | 67.07139597 | 30.35119851 | 1.1439 | 0.00020116 |
| AT5G56950 | 185.9445678 | 84.14705345 | 1.1439 | 3.12E-11   |
| AT2G43150 | 2447.243958 | 1108.147629 | 1.143  | 3.03E-143  |
| AT3G44100 | 71.05299047 | 32.23052969 | 1.1405 | 0.00012375 |
| AT5G08240 | 109.7606566 | 49.80227619 | 1.1401 | 7.92E-07   |



|           |             |             |        |            |
|-----------|-------------|-------------|--------|------------|
| AT4G36920 | 55.16765984 | 25.04208793 | 1.1395 | 0.0009755  |
| AT2G21250 | 66.33254338 | 30.11628211 | 1.1392 | 0.0002336  |
| AT2G39700 | 105.2864937 | 47.92294502 | 1.1355 | 1.54E-06   |
| AT3G13690 | 49.54417071 | 22.55197413 | 1.1355 | 0.0020892  |
| AT1G78610 | 43.14078162 | 19.6390108  | 1.1353 | 0.0047016  |
| AT2G22970 | 47.32761295 | 21.56532526 | 1.134  | 0.002789   |
| AT1G79530 | 231.0966703 | 105.6653954 | 1.129  | 1.34E-13   |
| AT2G22170 | 210.2035611 | 96.22175627 | 1.1274 | 2.17E-12   |
| AT2G01950 | 64.73169611 | 29.64644932 | 1.1266 | 0.00032604 |
| AT2G12400 | 141.2439863 | 64.74295905 | 1.1254 | 1.76E-08   |
| AT3G43600 | 100.9354729 | 46.27853024 | 1.125  | 3.21E-06   |
| AT4G03020 | 181.5114523 | 83.25437115 | 1.1245 | 9.83E-11   |
| AT1G53730 | 55.8244177  | 25.65287057 | 1.1218 | 0.001044   |
| AT3G46700 | 106.8873409 | 49.19149356 | 1.1196 | 1.64E-06   |
| AT4G17340 | 166.0365953 | 76.44179563 | 1.1191 | 8.46E-10   |
| AT4G12470 | 50.61140222 | 23.3037066  | 1.1189 | 0.0020758  |
| AT3G09390 | 257.1617477 | 118.4448474 | 1.1185 | 6.75E-15   |
| AT4G05390 | 75.69134282 | 34.86159334 | 1.1185 | 8.75E-05   |
| AT1G77590 | 78.19523215 | 36.03617532 | 1.1176 | 6.44E-05   |
| AT1G23190 | 110.1711302 | 50.78892506 | 1.1172 | 1.12E-06   |
| AT3G63410 | 47.28656558 | 21.80024165 | 1.1171 | 0.0031634  |
| AT2G35940 | 63.6644646  | 29.41153292 | 1.1141 | 0.00042187 |
| AT2G41475 | 65.79892763 | 30.39818179 | 1.1141 | 0.00032373 |
| AT4G02540 | 66.82511178 | 30.91499786 | 1.1121 | 0.00029073 |
| AT3G45600 | 97.28225732 | 45.00998169 | 1.1119 | 6.22E-06   |
| AT1G01090 | 198.1766828 | 91.71136144 | 1.1116 | 1.70E-11   |
| AT3G15950 | 1116.529401 | 516.863057  | 1.1112 | 6.78E-63   |
| AT1G67030 | 50.73454432 | 23.49163971 | 1.1108 | 0.0021732  |

|           |             |             |        |            |
|-----------|-------------|-------------|--------|------------|
| AT2G47180 | 54.46985462 | 25.23002105 | 1.1103 | 0.0013672  |
| AT4G12420 | 178.4739472 | 82.69057179 | 1.1099 | 2.21E-10   |
| AT1G48920 | 620.6361733 | 288.1014695 | 1.1072 | 6.62E-35   |
| AT3G27820 | 120.4740191 | 56.00406908 | 1.1051 | 3.79E-07   |
| AT3G54010 | 106.9283883 | 49.75529291 | 1.1037 | 2.13E-06   |
| AT4G15160 | 54.26461779 | 25.27700433 | 1.1022 | 0.0015025  |
| AT3G48115 | 49.70836017 | 23.16275676 | 1.1017 | 0.0026433  |
| AT5G35460 | 65.30635924 | 30.49214835 | 1.0988 | 0.00040088 |
| AT3G44590 | 55.49603877 | 25.98175352 | 1.0949 | 0.0013736  |
| AT2G37220 | 192.0606253 | 89.9729801  | 1.094  | 6.32E-11   |
| AT2G01140 | 499.8748226 | 234.3525978 | 1.0929 | 1.14E-27   |
| AT5G46470 | 58.61563858 | 27.48521847 | 1.0926 | 0.00095671 |
| AT3G53480 | 242.6309802 | 113.7935028 | 1.0923 | 1.22E-13   |
| AT1G53280 | 79.63188995 | 37.39869042 | 1.0904 | 7.52E-05   |
| AT5G46290 | 157.4576958 | 73.95168182 | 1.0903 | 5.19E-09   |
| AT3G54040 | 105.65592   | 49.66132636 | 1.0892 | 3.17E-06   |
| AT2G21790 | 65.96311709 | 31.00896442 | 1.089  | 0.00040838 |
| AT1G15500 | 387.076661  | 182.1541743 | 1.0875 | 2.34E-21   |
| AT3G09820 | 414.2910646 | 195.215526  | 1.0856 | 8.72E-23   |
| AT3G13470 | 75.65029546 | 35.66030909 | 1.085  | 0.00013062 |
| AT1G08190 | 199.3260091 | 94.01354213 | 1.0842 | 3.49E-11   |
| AT4G23800 | 55.53708614 | 26.2636532  | 1.0804 | 0.0015505  |
| AT5G56500 | 139.0274285 | 65.7765912  | 1.0797 | 6.40E-08   |
| AT1G72130 | 49.05160232 | 23.20974004 | 1.0796 | 0.0033646  |
| AT2G05380 | 65.26531187 | 30.91499786 | 1.078  | 0.00049661 |
| AT4G10480 | 197.3557355 | 93.54370934 | 1.0771 | 5.54E-11   |
| AT1G23820 | 143.009023  | 67.84385549 | 1.0758 | 4.29E-08   |
| AT1G09850 | 56.23489136 | 26.68650271 | 1.0754 | 0.0014872  |

|           |             |             |        |            |
|-----------|-------------|-------------|--------|------------|
| AT1G75840 | 86.4457527  | 41.06338622 | 1.0739 | 4.08E-05   |
| AT3G52880 | 410.186328  | 194.9336263 | 1.0733 | 3.25E-22   |
| AT1G74450 | 102.0847991 | 48.53372765 | 1.0727 | 6.34E-06   |
| AT4G37520 | 236.2686384 | 112.3370211 | 1.0726 | 5.64E-13   |
| AT1G19570 | 367.9485884 | 175.3885821 | 1.0689 | 7.31E-20   |
| AT4G18040 | 75.03458497 | 35.8482422  | 1.0657 | 0.00017716 |
| AT5G20885 | 57.42526497 | 27.48521847 | 1.063  | 0.001438   |
| AT5G54800 | 110.6226513 | 52.95015591 | 1.0629 | 2.71E-06   |
| AT1G04820 | 367.7023042 | 176.046348  | 1.0626 | 1.09E-19   |
| AT1G56110 | 254.16529   | 121.733677  | 1.062  | 9.71E-14   |
| AT1G47128 | 934.7716649 | 447.7976362 | 1.0618 | 1.75E-49   |
| AT3G15353 | 92.64390496 | 44.39919906 | 1.0612 | 2.33E-05   |
| AT3G53420 | 764.3840488 | 366.5635461 | 1.0602 | 1.97E-40   |
| AT2G28890 | 60.17543849 | 28.94170013 | 1.056  | 0.0011073  |
| AT5G64290 | 61.7352384  | 29.6934326  | 1.056  | 0.00092725 |
| AT3G50530 | 64.44436455 | 31.10293098 | 1.051  | 0.00071303 |
| AT3G02630 | 67.6460591  | 32.6533792  | 1.0508 | 0.00049539 |
| AT4G13340 | 578.1931969 | 279.2686129 | 1.0499 | 2.96E-30   |
| AT5G63980 | 56.89164921 | 27.48521847 | 1.0496 | 0.0017276  |
| AT1G66330 | 47.90227607 | 23.16275676 | 1.0483 | 0.0048466  |
| AT3G25860 | 133.2807973 | 64.50804265 | 1.0469 | 2.54E-07   |
| AT2G26650 | 150.0691699 | 72.73011655 | 1.045  | 3.73E-08   |
| AT1G33240 | 63.00770674 | 30.58611491 | 1.0427 | 0.00090937 |
| AT3G48690 | 110.9099828 | 53.93680478 | 1.04   | 3.86E-06   |
| AT2G21660 | 1731.952559 | 842.4571834 | 1.0397 | 5.63E-89   |
| AT3G16400 | 780.556711  | 379.7658476 | 1.0394 | 3.64E-40   |
| AT2G06850 | 59.35449117 | 28.89471685 | 1.0386 | 0.0014314  |
| AT1G20620 | 500.9420541 | 243.9841701 | 1.0379 | 7.74E-26   |

|           |             |             |        |            |
|-----------|-------------|-------------|--------|------------|
| AT1G14120 | 51.88387057 | 25.27700433 | 1.0375 | 0.0033456  |
| AT5G15490 | 93.62904175 | 45.62076432 | 1.0373 | 2.93E-05   |
| AT3G06650 | 221.8199656 | 108.108526  | 1.0369 | 1.12E-11   |
| AT2G10410 | 181.5524996 | 88.51649844 | 1.0364 | 1.21E-09   |
| AT3G07460 | 51.92491793 | 25.32398761 | 1.0359 | 0.0033703  |
| AT2G42490 | 248.8701798 | 121.404794  | 1.0356 | 5.14E-13   |
| AT4G12600 | 87.63612632 | 42.75478428 | 1.0354 | 5.93E-05   |
| AT3G59970 | 271.8977521 | 132.7747477 | 1.0341 | 3.78E-14   |
| AT5G51040 | 220.6706394 | 107.779643  | 1.0338 | 1.42E-11   |
| AT4G08390 | 178.7202314 | 87.38889974 | 1.0322 | 1.89E-09   |
| AT4G21910 | 49.37998124 | 24.14940563 | 1.0319 | 0.0046278  |
| AT1G48480 | 51.47339691 | 25.18303777 | 1.0314 | 0.0036679  |
| AT4G29680 | 74.37782711 | 36.50600812 | 1.0267 | 0.00029964 |
| AT3G09980 | 88.58021573 | 43.55350003 | 1.0242 | 6.20E-05   |
| AT1G62640 | 68.50805378 | 33.68701135 | 1.0241 | 0.00059257 |
| AT3G01930 | 52.86900735 | 26.0287368  | 1.0223 | 0.0033777  |
| AT1G05000 | 55.12661248 | 27.15633551 | 1.0215 | 0.0026658  |
| AT1G65010 | 122.7316242 | 60.5144639  | 1.0202 | 1.44E-06   |
| AT5G67420 | 78.7288479  | 38.90215537 | 1.017  | 0.00020585 |
| AT3G01720 | 128.3961607 | 63.47441051 | 1.0164 | 8.18E-07   |
| AT5G58300 | 51.76072847 | 25.60588729 | 1.0154 | 0.0040211  |
| AT3G62130 | 50.89873379 | 25.18303777 | 1.0152 | 0.004439   |
| AT3G21220 | 49.913597   | 24.71320498 | 1.0142 | 0.0049808  |
| AT5G54960 | 138.8221917 | 68.7365378  | 1.0141 | 2.69E-07   |
| AT5G52540 | 56.44012819 | 27.95505126 | 1.0136 | 0.0024664  |
| AT5G13420 | 418.4368486 | 207.6191118 | 1.0111 | 7.03E-21   |
| AT5G58620 | 103.8087885 | 51.54065753 | 1.0101 | 1.40E-05   |
| AT2G28000 | 173.7535001 | 86.30828431 | 1.0095 | 6.07E-09   |

|           |             |             |         |            |
|-----------|-------------|-------------|---------|------------|
| AT3G46560 | 61.44790684 | 30.53913163 | 1.0087  | 0.001489   |
| AT3G15090 | 57.5073597  | 28.61281717 | 1.0071  | 0.0023251  |
| AT3G45310 | 55.7012756  | 27.81410142 | 1.0019  | 0.0029341  |
| AT1G45160 | 66.53778021 | 33.26416183 | 1.0002  | 0.00093087 |
| AT5G11740 | 280.1072253 | 562.2958882 | -1.0054 | 1.61E-15   |
| AT3G06860 | 130.4074816 | 261.9787661 | -1.0064 | 1.61E-07   |
| AT5G57560 | 407.6003439 | 819.4353765 | -1.0075 | 1.68E-22   |
| AT4G33940 | 45.19314992 | 90.91264569 | -1.0084 | 0.0049566  |
| AT1G17290 | 129.4223449 | 260.8041841 | -1.0109 | 1.50E-07   |
| AT1G71880 | 152.5730593 | 307.5525471 | -1.0113 | 8.12E-09   |
| AT3G06380 | 45.76781304 | 92.41611063 | -1.0138 | 0.0042602  |
| AT2G03730 | 51.88387057 | 104.8666797 | -1.0152 | 0.0019873  |
| AT1G45145 | 213.8567766 | 432.6690202 | -1.0166 | 2.63E-12   |
| AT2G48020 | 45.97304987 | 93.02689327 | -1.0169 | 0.0039606  |
| AT1G73500 | 77.33323746 | 156.6422536 | -1.0183 | 7.76E-05   |
| AT1G03290 | 48.60008129 | 98.47695368 | -1.0188 | 0.0027918  |
| AT4G30920 | 63.4181804  | 128.5932358 | -1.0198 | 0.00043463 |
| AT5G58020 | 54.67509145 | 110.974506  | -1.0213 | 0.0012529  |
| AT5G05410 | 201.4604721 | 409.0364307 | -1.0217 | 8.96E-12   |
| AT3G27260 | 81.76635298 | 166.1328761 | -1.0228 | 3.95E-05   |
| AT4G22330 | 70.68356418 | 143.8158183 | -1.0248 | 0.0001542  |
| AT5G62640 | 45.07000782 | 91.71136144 | -1.0249 | 0.003929   |
| AT1G19770 | 262.9494263 | 535.2805025 | -1.0255 | 2.27E-15   |
| AT4G03390 | 48.18960763 | 98.14807072 | -1.0262 | 0.0026199  |
| AT5G53310 | 49.09264968 | 100.0743852 | -1.0275 | 0.0022927  |
| AT3G05545 | 70.80670627 | 144.4735842 | -1.0288 | 0.00013761 |
| AT3G10300 | 76.88171644 | 157.0651031 | -1.0307 | 5.97E-05   |
| AT5G44290 | 101.3048992 | 207.8070449 | -1.0365 | 2.05E-06   |

|           |             |             |         |            |
|-----------|-------------|-------------|---------|------------|
| AT1G25682 | 47.40970768 | 97.39633825 | -1.0387 | 0.0023775  |
| AT1G14900 | 52.13015476 | 107.1218771 | -1.0391 | 0.0012627  |
| AT5G25350 | 83.69557918 | 172.1937191 | -1.0408 | 1.84E-05   |
| AT2G44380 | 46.67085509 | 96.08080643 | -1.0417 | 0.0024882  |
| AT3G03790 | 41.78621854 | 86.07336791 | -1.0425 | 0.0046596  |
| AT4G27960 | 132.0493763 | 271.9862046 | -1.0425 | 2.63E-08   |
| AT1G12200 | 55.9475598  | 115.2499844 | -1.0426 | 0.00071689 |
| AT5G53550 | 51.76072847 | 106.6520443 | -1.043  | 0.0012368  |
| AT1G08940 | 42.11459747 | 87.2479499  | -1.0508 | 0.0039448  |
| AT4G31860 | 68.13862749 | 141.2787212 | -1.052  | 0.00011286 |
| AT2G22010 | 60.13439113 | 124.6936236 | -1.0521 | 0.00033929 |
| AT3G62240 | 43.42811318 | 90.2078965  | -1.0546 | 0.0031313  |
| AT4G17140 | 137.7960075 | 286.7389543 | -1.0572 | 5.83E-09   |
| AT5G65630 | 195.1802251 | 406.9221831 | -1.0599 | 1.49E-12   |
| AT2G45000 | 40.30851337 | 84.19403673 | -1.0626 | 0.0042699  |
| AT3G50930 | 167.9247741 | 350.7771642 | -1.0627 | 6.01E-11   |
| AT1G33980 | 56.0707019  | 117.4581986 | -1.0668 | 0.00044118 |
| AT4G22820 | 60.21648586 | 126.2910551 | -1.0685 | 0.00023661 |
| AT5G50960 | 51.9659653  | 109.3770745 | -1.0737 | 0.00069068 |
| AT4G33430 | 116.8618509 | 246.0044511 | -1.0739 | 5.51E-08   |
| AT4G16760 | 216.1143818 | 455.5028941 | -1.0757 | 2.15E-14   |
| AT3G02750 | 68.46700641 | 144.3796177 | -1.0764 | 5.92E-05   |
| AT1G28200 | 70.72461154 | 149.5947617 | -1.0808 | 3.81E-05   |
| AT1G78420 | 56.93269658 | 120.7000448 | -1.0841 | 0.0002741  |
| AT4G01000 | 127.3699766 | 270.0598902 | -1.0843 | 7.13E-09   |
| AT1G69840 | 38.42033453 | 81.46900653 | -1.0844 | 0.0041137  |
| AT1G02360 | 49.09264968 | 104.3498636 | -1.0878 | 0.00080893 |
| AT5G42570 | 82.66939504 | 175.7644483 | -1.0882 | 5.17E-06   |

|           |             |             |         |            |
|-----------|-------------|-------------|---------|------------|
| AT3G51130 | 42.93554479 | 91.33549521 | -1.089  | 0.0019923  |
| AT2G04400 | 51.18606535 | 109.2361247 | -1.0936 | 0.00053343 |
| AT3G25730 | 39.32337659 | 83.95912034 | -1.0943 | 0.0031305  |
| AT1G62380 | 150.9311646 | 322.7751297 | -1.0966 | 1.02E-10   |
| AT2G02860 | 50.89873379 | 109.0481916 | -1.0993 | 0.00050019 |
| AT3G12140 | 40.92422386 | 87.76476597 | -1.1007 | 0.0022456  |
| AT1G64280 | 53.36157574 | 114.498252  | -1.1015 | 0.00032867 |
| AT2G39570 | 244.2318274 | 525.3200473 | -1.1049 | 2.16E-17   |
| AT1G67580 | 62.80246991 | 135.1239116 | -1.1054 | 6.86E-05   |
| AT5G26760 | 35.50597155 | 76.39481235 | -1.1054 | 0.0047971  |
| AT1G62570 | 104.5065937 | 225.143875  | -1.1073 | 9.03E-08   |
| AT4G05070 | 38.95395029 | 84.00610362 | -1.1087 | 0.0026893  |
| AT2G42680 | 116.3282351 | 250.8907121 | -1.1089 | 1.27E-08   |
| AT3G45980 | 122.4442926 | 264.2809468 | -1.1099 | 4.57E-09   |
| AT4G12040 | 131.7620447 | 284.4837569 | -1.1104 | 1.00E-09   |
| AT2G20900 | 52.54062842 | 113.6055697 | -1.1125 | 0.00029955 |
| AT3G18830 | 74.17259028 | 160.5888491 | -1.1144 | 8.89E-06   |
| AT2G03240 | 143.3374019 | 310.6534436 | -1.1159 | 1.14E-10   |
| AT3G48360 | 174.5744474 | 378.4503158 | -1.1163 | 6.81E-13   |
| AT4G18710 | 157.252459  | 341.0986086 | -1.1171 | 1.09E-11   |
| AT4G25810 | 122.1980085 | 265.0796625 | -1.1172 | 3.36E-09   |
| AT1G29930 | 60.62695952 | 131.647149  | -1.1186 | 7.07E-05   |
| AT4G21660 | 174.9028263 | 381.6451788 | -1.1257 | 3.34E-13   |
| AT5G13800 | 43.46916055 | 94.85924116 | -1.1258 | 0.00099679 |
| AT5G56870 | 203.1434141 | 443.9450073 | -1.1279 | 2.43E-15   |
| AT5G51070 | 127.082645  | 277.8591145 | -1.1286 | 8.54E-10   |
| AT5G22450 | 83.98291075 | 183.7985891 | -1.13   | 1.11E-06   |
| AT5G44070 | 63.58236987 | 139.1644737 | -1.1301 | 3.30E-05   |

|           |             |             |         |            |
|-----------|-------------|-------------|---------|------------|
| AT5G57910 | 46.3014288  | 101.4838836 | -1.1321 | 0.00056383 |
| AT5G13160 | 39.32337659 | 86.26130103 | -1.1333 | 0.0017547  |
| AT5G15970 | 316.1468126 | 694.8827027 | -1.1362 | 4.29E-24   |
| AT3G52240 | 40.06222917 | 88.14063221 | -1.1376 | 0.0014452  |
| AT4G27520 | 109.2680882 | 240.4134408 | -1.1376 | 1.13E-08   |
| AT3G57280 | 42.0735501  | 92.60404375 | -1.1382 | 0.0010191  |
| AT3G63070 | 62.43304362 | 137.5200589 | -1.1393 | 3.17E-05   |
| AT5G43180 | 49.913597   | 110.128807  | -1.1417 | 0.00025674 |
| AT4G27585 | 34.64397687 | 76.48877891 | -1.1426 | 0.0033233  |
| AT1G75380 | 62.43304362 | 137.8959251 | -1.1432 | 2.88E-05   |
| AT5G08630 | 36.86053463 | 81.60995637 | -1.1467 | 0.0021674  |
| AT3G61070 | 40.1443239  | 88.89236468 | -1.1469 | 0.0012242  |
| AT4G33150 | 219.8086447 | 487.4045408 | -1.1489 | 2.19E-17   |
| AT5G51980 | 40.3906081  | 89.78504699 | -1.1525 | 0.0010711  |
| AT3G25900 | 33.24836642 | 74.04564838 | -1.1551 | 0.0035532  |
| AT5G49440 | 138.5348601 | 308.5861793 | -1.1554 | 2.71E-11   |
| AT5G52580 | 56.02965453 | 124.8815567 | -1.1563 | 6.40E-05   |
| AT5G55100 | 45.9320025  | 102.3765659 | -1.1563 | 0.00038385 |
| AT5G39660 | 39.98013444 | 89.12728107 | -1.1566 | 0.0010751  |
| AT1G01770 | 41.78621854 | 93.16784311 | -1.1568 | 0.00078297 |
| AT1G22020 | 34.80816633 | 77.66336089 | -1.1578 | 0.0026276  |
| AT5G27380 | 79.18036893 | 176.9390303 | -1.16   | 9.33E-07   |
| AT1G60940 | 80.32969518 | 179.7580271 | -1.1621 | 7.09E-07   |
| AT2G47160 | 40.43165547 | 90.58376274 | -1.1638 | 0.00088356 |
| AT5G57580 | 70.80670627 | 158.897451  | -1.1661 | 3.49E-06   |
| AT1G13880 | 33.37150852 | 75.1262638  | -1.1707 | 0.0028219  |
| AT1G47380 | 42.11459747 | 94.95320772 | -1.1729 | 0.000562   |
| AT5G18130 | 55.16765984 | 124.5526738 | -1.1749 | 4.85E-05   |



|           |             |             |         |            |
|-----------|-------------|-------------|---------|------------|
| AT4G37820 | 46.58876036 | 105.2425459 | -1.1757 | 0.00023517 |
| AT2G44080 | 33.53569799 | 75.87799628 | -1.178  | 0.0024821  |
| AT5G47120 | 127.0005503 | 287.3967203 | -1.1782 | 6.24E-11   |
| AT3G09440 | 780.3514742 | 1766.148457 | -1.1784 | 3.75E-65   |
| AT3G11340 | 45.48048148 | 102.9873485 | -1.1791 | 0.00027023 |
| AT2G19270 | 35.34178209 | 80.05950814 | -1.1797 | 0.0017398  |
| AT5G18650 | 70.72461154 | 160.5418658 | -1.1827 | 2.17E-06   |
| AT2G30250 | 51.76072847 | 117.693115  | -1.1851 | 7.25E-05   |
| AT1G53210 | 237.4179647 | 540.072797  | -1.1857 | 2.34E-20   |
| AT3G53110 | 96.87178366 | 220.8214133 | -1.1887 | 1.17E-08   |
| AT1G02170 | 40.76003439 | 92.93292671 | -1.189  | 0.00054352 |
| AT3G45960 | 67.56396436 | 154.0581732 | -1.1891 | 3.25E-06   |
| AT1G19180 | 291.4362983 | 664.5315042 | -1.1892 | 4.23E-25   |
| AT3G11420 | 86.19946851 | 197.1418405 | -1.1935 | 7.70E-08   |
| AT3G17000 | 50.69349696 | 116.0487002 | -1.1949 | 7.16E-05   |
| AT5G62460 | 36.16272941 | 82.78453835 | -1.1949 | 0.0011752  |
| AT5G50430 | 30.16981398 | 69.11240404 | -1.1958 | 0.0036341  |
| AT5G18470 | 46.75294982 | 107.2628269 | -1.198  | 0.00014458 |
| AT1G16840 | 32.14008754 | 73.81073198 | -1.1995 | 0.0023922  |
| AT5G23830 | 44.45429733 | 102.1886328 | -1.2008 | 0.00021513 |
| AT1G73920 | 66.20940129 | 152.4137585 | -1.2029 | 2.83E-06   |
| AT5G50210 | 36.86053463 | 84.89878593 | -1.2037 | 0.00089352 |
| AT1G55810 | 82.7104424  | 190.6581479 | -1.2048 | 1.00E-07   |
| AT3G26020 | 37.64043458 | 86.7781171  | -1.205  | 0.00075115 |
| AT5G23050 | 107.8314304 | 248.7294813 | -1.2058 | 6.35E-10   |
| AT5G16630 | 28.24058778 | 65.16580857 | -1.2063 | 0.0046278  |
| AT5G44090 | 63.37713304 | 146.3059321 | -1.207  | 4.39E-06   |
| AT5G41100 | 33.16627169 | 76.58274547 | -1.2073 | 0.0017539  |

|           |             |             |         |            |
|-----------|-------------|-------------|---------|------------|
| AT5G65660 | 115.6304299 | 267.005977  | -1.2074 | 1.21E-10   |
| AT3G54020 | 51.51444427 | 119.0086468 | -1.208  | 4.54E-05   |
| AT1G21450 | 61.57104893 | 142.5002865 | -1.2106 | 5.67E-06   |
| AT2G20560 | 33.65884008 | 77.89827729 | -1.2106 | 0.0015094  |
| AT4G33910 | 29.71829295 | 68.83050436 | -1.2117 | 0.0032319  |
| AT1G11380 | 27.66592465 | 64.13217642 | -1.2129 | 0.0047808  |
| AT1G61340 | 74.13154292 | 171.8648361 | -1.2131 | 4.18E-07   |
| AT2G33830 | 656.5526185 | 1523.761718 | -1.2147 | 1.73E-59   |
| AT4G21980 | 71.5045115  | 165.9919262 | -1.215  | 6.71E-07   |
| AT1G27300 | 54.92137565 | 127.6065869 | -1.2163 | 1.88E-05   |
| AT5G02490 | 34.64397687 | 80.52934094 | -1.2169 | 0.0011228  |
| AT1G04985 | 34.93130843 | 81.42202325 | -1.2209 | 0.00099727 |
| AT1G06760 | 197.6020197 | 460.7650213 | -1.2214 | 2.13E-18   |
| AT4G33540 | 33.53569799 | 78.36811009 | -1.2246 | 0.001252   |
| AT3G20060 | 27.37859309 | 63.99122658 | -1.2248 | 0.0043745  |
| AT5G13750 | 71.70974832 | 167.8242741 | -1.2267 | 4.38E-07   |
| AT5G16830 | 68.54910115 | 160.4478992 | -1.2269 | 8.43E-07   |
| AT4G19880 | 222.8051024 | 522.1721676 | -1.2287 | 5.18E-21   |
| AT1G30720 | 61.77628576 | 144.8024672 | -1.229  | 3.28E-06   |
| AT4G21570 | 92.15133657 | 216.1700686 | -1.2301 | 5.25E-09   |
| AT3G04350 | 54.34671253 | 127.5596036 | -1.2309 | 1.47E-05   |
| AT1G69830 | 33.33046116 | 78.27414353 | -1.2317 | 0.0011729  |
| AT1G59870 | 557.7516086 | 1310.927463 | -1.2329 | 1.30E-52   |
| AT1G01350 | 28.938393   | 68.03178861 | -1.2332 | 0.0028564  |
| AT5G10980 | 208.5206191 | 490.2705208 | -1.2334 | 6.75E-20   |
| AT1G22280 | 68.71329061 | 161.6224812 | -1.234  | 6.53E-07   |
| AT2G18440 | 140.5051337 | 330.9502203 | -1.236  | 1.25E-13   |
| AT2G31260 | 37.27100829 | 87.81174925 | -1.2364 | 0.00048089 |

|           |             |             |         |            |
|-----------|-------------|-------------|---------|------------|
| AT5G17380 | 106.2305831 | 250.6557957 | -1.2385 | 1.76E-10   |
| AT1G71697 | 55.12661248 | 130.143684  | -1.2393 | 1.01E-05   |
| AT1G31930 | 60.54486478 | 143.0640859 | -1.2406 | 3.06E-06   |
| AT3G62010 | 78.64675317 | 185.8658534 | -1.2408 | 6.16E-08   |
| AT3G02340 | 28.03535095 | 66.34039055 | -1.2426 | 0.0030555  |
| AT4G02380 | 355.8806628 | 844.571431  | -1.2468 | 1.04E-34   |
| AT5G14120 | 112.6339722 | 267.2878767 | -1.2468 | 2.84E-11   |
| AT1G14000 | 67.31768017 | 159.8840999 | -1.248  | 5.62E-07   |
| AT2G31955 | 26.14717211 | 62.15887868 | -1.2493 | 0.0041909  |
| AT1G01340 | 38.2150977  | 90.91264569 | -1.2503 | 0.00030871 |
| AT4G21390 | 30.33400344 | 72.30726704 | -1.2532 | 0.0016243  |
| AT5G09390 | 35.21863999 | 83.95912034 | -1.2533 | 0.00056141 |
| AT2G47730 | 529.0594998 | 1261.688986 | -1.2539 | 3.10E-52   |
| AT5G63320 | 63.99284353 | 152.6956581 | -1.2547 | 9.50E-07   |
| AT1G72416 | 34.35664531 | 81.9858226  | -1.2548 | 0.00066147 |
| AT2G46740 | 40.18537127 | 95.89287331 | -1.2548 | 0.00018407 |
| AT5G61440 | 29.22572456 | 69.77016995 | -1.2554 | 0.0020103  |
| AT2G38560 | 26.59869314 | 63.52139379 | -1.2559 | 0.0035043  |
| AT2G32240 | 179.3359419 | 429.098291  | -1.2586 | 4.08E-18   |
| AT1G56145 | 63.62341723 | 152.507725  | -1.2613 | 8.43E-07   |
| AT1G19020 | 105.5738252 | 253.1928928 | -1.262  | 6.17E-11   |
| AT4G36648 | 180.1158418 | 432.3401373 | -1.2632 | 2.27E-18   |
| AT3G58750 | 85.13223699 | 204.3772655 | -1.2635 | 5.98E-09   |
| AT5G26740 | 84.5165265  | 203.1557002 | -1.2653 | 6.36E-09   |
| AT4G05020 | 93.67008911 | 225.1908583 | -1.2655 | 7.92E-10   |
| AT1G61690 | 54.05938096 | 130.4255837 | -1.2706 | 5.64E-06   |
| AT1G23800 | 46.46561826 | 112.149088  | -1.2712 | 3.17E-05   |
| AT3G54620 | 94.24475223 | 227.493039  | -1.2713 | 5.30E-10   |

|           |             |             |         |            |
|-----------|-------------|-------------|---------|------------|
| ATCG01130 | 102.4952728 | 247.4609327 | -1.2716 | 7.61E-11   |
| AT4G20380 | 37.18891356 | 89.87901355 | -1.2731 | 0.00025743 |
| AT5G10400 | 33.82302955 | 81.84487276 | -1.2749 | 0.00053662 |
| AT1G30730 | 86.28156324 | 208.8406771 | -1.2753 | 2.81E-09   |
| AT2G23320 | 71.66870096 | 173.7441673 | -1.2775 | 7.81E-08   |
| AT2G39350 | 42.27878693 | 102.5175157 | -1.2779 | 7.17E-05   |
| AT2G46140 | 49.25683915 | 119.5254629 | -1.2789 | 1.39E-05   |
| AT3G22750 | 24.01270908 | 58.35323305 | -1.281  | 0.0046278  |
| AT2G23140 | 25.16203533 | 61.17222981 | -1.2816 | 0.0035184  |
| AT4G19860 | 99.66300454 | 242.5746717 | -1.2833 | 8.24E-11   |
| AT2G03470 | 35.87539785 | 87.38889974 | -1.2845 | 0.00028494 |
| AT4G21470 | 36.20377677 | 88.28158204 | -1.286  | 0.00025674 |
| AT2G02220 | 62.39199625 | 152.3197919 | -1.2877 | 4.94E-07   |
| AT4G30530 | 158.1144537 | 386.5784231 | -1.2898 | 4.26E-17   |
| AT5G62480 | 35.30073472 | 86.30828431 | -1.2898 | 0.0002966  |
| AT2G31800 | 70.39623261 | 172.1467358 | -1.2901 | 6.78E-08   |
| AT1G71950 | 55.78337033 | 136.4864267 | -1.2909 | 2.19E-06   |
| AT2G22470 | 203.5538878 | 498.6805278 | -1.2927 | 5.32E-22   |
| AT4G27450 | 54.05938096 | 132.492848  | -1.2933 | 3.10E-06   |
| AT2G43820 | 23.72537752 | 58.21228321 | -1.2949 | 0.0041973  |
| AT3G49790 | 40.3906081  | 99.18170287 | -1.2961 | 7.72E-05   |
| AT2G27550 | 40.59584493 | 99.98041862 | -1.3003 | 6.74E-05   |
| AT1G05960 | 75.1166797  | 185.5369705 | -1.3045 | 1.25E-08   |
| AT1G21680 | 45.02896045 | 111.303389  | -1.3056 | 2.04E-05   |
| AT4G39670 | 23.72537752 | 58.68211601 | -1.3065 | 0.0036578  |
| AT3G50950 | 66.49673285 | 164.6763944 | -1.3083 | 9.33E-08   |
| AT5G57015 | 34.31559794 | 84.99275248 | -1.3085 | 0.00027159 |
| AT4G19200 | 159.5100641 | 395.5052462 | -1.31   | 5.81E-18   |

|           |             |             |         |            |
|-----------|-------------|-------------|---------|------------|
| AT2G33700 | 37.72252931 | 93.6376759  | -1.3117 | 0.00010913 |
| AT3G45040 | 30.53924027 | 75.831013   | -1.3121 | 0.00064643 |
| AT2G18750 | 110.704746  | 275.2280509 | -1.3139 | 1.06E-12   |
| AT5G12480 | 70.10890105 | 174.4958998 | -1.3155 | 2.90E-08   |
| AT5G45190 | 55.24975458 | 137.5200589 | -1.3156 | 1.24E-06   |
| AT4G24590 | 33.53569799 | 83.48928754 | -1.3159 | 0.00028952 |
| AT1G55450 | 50.81663905 | 126.6669213 | -1.3177 | 3.57E-06   |
| AT3G52060 | 74.8703955  | 186.6645692 | -1.318  | 7.80E-09   |
| AT5G23340 | 27.46068782 | 68.54860468 | -1.3198 | 0.0012292  |
| AT4G15420 | 23.1507144  | 57.88340025 | -1.3221 | 0.0035025  |
| AT1G42990 | 82.05368455 | 205.2229645 | -1.3226 | 1.04E-09   |
| AT3G19190 | 59.6828701  | 149.5007951 | -1.3248 | 3.04E-07   |
| AT3G03310 | 32.34532437 | 81.09314029 | -1.326  | 0.00032856 |
| AT3G44190 | 204.9905456 | 514.1850101 | -1.3267 | 9.57E-24   |
| AT3G51730 | 179.6232734 | 451.4153487 | -1.3295 | 5.80E-21   |
| AT2G06025 | 40.267466   | 101.4369003 | -1.3329 | 3.71E-05   |
| AT3G22370 | 92.1102892  | 232.1913669 | -1.3339 | 4.47E-11   |
| AT1G32460 | 107.2157199 | 270.3887731 | -1.3345 | 7.95E-13   |
| AT1G55520 | 23.23280913 | 58.63513273 | -1.3356 | 0.0029235  |
| AT5G46410 | 52.99214945 | 133.7613965 | -1.3358 | 1.25E-06   |
| AT3G02875 | 22.86338284 | 57.74245042 | -1.3366 | 0.0031735  |
| AT4G03320 | 28.97944036 | 73.24693263 | -1.3377 | 0.00064643 |
| AT1G03230 | 50.44721276 | 127.6065869 | -1.3389 | 2.24E-06   |
| AT1G63440 | 65.18321714 | 165.0992439 | -1.3408 | 4.22E-08   |
| AT1G06620 | 24.50527748 | 62.1118954  | -1.3418 | 0.0019597  |
| AT3G08690 | 31.36018759 | 79.63665863 | -1.3445 | 0.00031129 |
| AT5G16360 | 65.3474066  | 166.461759  | -1.349  | 3.02E-08   |
| AT2G17440 | 79.63188995 | 203.1557002 | -1.3512 | 5.73E-10   |

|           |             |             |         |            |
|-----------|-------------|-------------|---------|------------|
| AT3G07280 | 30.70342973 | 78.41509336 | -1.3527 | 0.0003234  |
| AT3G23590 | 30.70342973 | 78.46207664 | -1.3536 | 0.00031879 |
| AT3G10340 | 45.15210255 | 115.4379176 | -1.3543 | 6.18E-06   |
| AT2G26670 | 70.51937471 | 180.415793  | -1.3552 | 5.81E-09   |
| AT1G15110 | 53.48471784 | 137.0502261 | -1.3575 | 5.82E-07   |
| AT1G32700 | 35.99853994 | 92.41611063 | -1.3602 | 6.63E-05   |
| AT3G28580 | 24.42318274 | 62.72267804 | -1.3607 | 0.0015576  |
| AT3G51600 | 21.26253557 | 54.64155397 | -1.3617 | 0.0036037  |
| AT1G63090 | 35.75225575 | 92.0402444  | -1.3642 | 6.55E-05   |
| AT1G32230 | 396.8459341 | 1021.886328 | -1.3646 | 2.78E-49   |
| AT2G30600 | 76.67647961 | 197.56469   | -1.3655 | 6.98E-10   |
| AT3G12740 | 109.5554197 | 283.0272753 | -1.3693 | 5.24E-14   |
| AT1G21000 | 67.85129592 | 175.3415988 | -1.3697 | 6.97E-09   |
| AT4G17490 | 97.24120995 | 251.4075282 | -1.3704 | 1.63E-12   |
| AT1G28330 | 245.299059  | 634.6031552 | -1.3713 | 5.51E-31   |
| AT4G24060 | 51.8428232  | 134.2312293 | -1.3725 | 5.93E-07   |
| AT1G34300 | 31.77066125 | 82.26772228 | -1.3726 | 0.00017064 |
| AT2G24100 | 43.92068157 | 113.7465195 | -1.3729 | 5.50E-06   |
| AT3G16800 | 27.62487729 | 71.55553457 | -1.3731 | 0.00054211 |
| AT1G75180 | 22.69919337 | 58.82306584 | -1.3737 | 0.0021202  |
| AT5G13330 | 21.63196186 | 56.09803564 | -1.3748 | 0.002805   |
| AT2G46500 | 139.4379022 | 362.006168  | -1.3764 | 5.92E-18   |
| AT4G36780 | 81.10959513 | 210.7669915 | -1.3777 | 1.14E-10   |
| AT3G06760 | 39.40547132 | 102.564499  | -1.3801 | 1.68E-05   |
| AT1G70590 | 43.46916055 | 113.2766867 | -1.3818 | 5.03E-06   |
| AT2G45820 | 416.0971487 | 1084.327106 | -1.3818 | 1.95E-53   |
| AT1G09060 | 31.56542442 | 82.31470556 | -1.3828 | 0.00015083 |
| AT2G42400 | 21.05729874 | 54.92345365 | -1.3831 | 0.0029844  |

|           |             |             |         |            |
|-----------|-------------|-------------|---------|------------|
| AT1G60140 | 92.93123652 | 243.2324376 | -1.3881 | 2.17E-12   |
| AT5G61590 | 26.39345631 | 69.15938732 | -1.3897 | 0.00059848 |
| AT5G40590 | 20.85206191 | 54.64155397 | -1.3898 | 0.002924   |
| AT5G25280 | 67.89234329 | 178.0196458 | -1.3907 | 3.09E-09   |
| AT4G01700 | 26.7628826  | 70.28698602 | -1.393  | 0.00051161 |
| AT4G17260 | 20.975204   | 55.15837005 | -1.3949 | 0.0026677  |
| AT4G18140 | 22.61709864 | 59.48083176 | -1.395  | 0.0016564  |
| AT5G47230 | 91.04305769 | 239.426792  | -1.395  | 2.63E-12   |
| AT3G18290 | 69.205859   | 182.3421075 | -1.3977 | 1.60E-09   |
| AT3G54140 | 30.29295608 | 79.91855831 | -1.3995 | 0.0001625  |
| AT5G54540 | 53.81309677 | 142.077437  | -1.4006 | 1.44E-07   |
| AT1G14040 | 82.17682664 | 216.9687844 | -1.4007 | 2.82E-11   |
| AT1G27290 | 67.81024856 | 179.3351776 | -1.4031 | 1.95E-09   |
| AT4G34710 | 375.8296827 | 995.0118917 | -1.4046 | 1.77E-50   |
| AT2G23790 | 49.01055495 | 130.0967007 | -1.4084 | 4.80E-07   |
| AT1G15380 | 132.0083289 | 351.9517462 | -1.4147 | 2.63E-18   |
| AT2G32560 | 25.16203533 | 67.18608958 | -1.4169 | 0.00057729 |
| AT5G04760 | 34.27455057 | 91.5704116  | -1.4177 | 3.46E-05   |
| AT5G01830 | 46.87609192 | 125.4453561 | -1.4201 | 6.67E-07   |
| AT2G46270 | 49.7904549  | 133.3855303 | -1.4217 | 2.58E-07   |
| AT5G01100 | 74.33677975 | 199.584971  | -1.4249 | 1.02E-10   |
| AT1G28380 | 67.35872753 | 181.3554586 | -1.4289 | 7.96E-10   |
| AT4G08770 | 51.06292325 | 137.5670422 | -1.4298 | 1.35E-07   |
| AT4G33980 | 29.02048773 | 78.36811009 | -1.4332 | 0.00013313 |
| AT2G44410 | 27.87116148 | 75.31419692 | -1.4341 | 0.00018939 |
| AT1G76590 | 30.8676192  | 83.5832541  | -1.4371 | 6.88E-05   |
| AT2G15490 | 40.55479756 | 109.8469073 | -1.4375 | 3.10E-06   |
| AT3G05360 | 19.08702517 | 51.72859065 | -1.4384 | 0.0028398  |

|           |             |             |         |            |
|-----------|-------------|-------------|---------|------------|
| AT1G15230 | 29.18467719 | 79.16682584 | -1.4397 | 0.00011284 |
| AT5G05440 | 80.69912147 | 218.9420821 | -1.4399 | 6.54E-12   |
| AT1G32530 | 40.06222917 | 108.7193086 | -1.4403 | 3.40E-06   |
| AT2G30620 | 160.618343  | 436.5686324 | -1.4426 | 2.28E-23   |
| AT5G63620 | 58.69773332 | 159.7901333 | -1.4448 | 6.93E-09   |
| AT5G27030 | 40.71898703 | 110.9275227 | -1.4458 | 2.40E-06   |
| AT2G29460 | 17.03465687 | 46.46646335 | -1.4477 | 0.0049146  |
| AT3G05580 | 43.96172894 | 119.9483124 | -1.4481 | 7.81E-07   |
| AT4G00755 | 18.88178834 | 51.54065753 | -1.4487 | 0.0026957  |
| AT5G45110 | 117.436514  | 321.3656313 | -1.4523 | 1.63E-17   |
| AT3G62650 | 81.56111615 | 223.3115271 | -1.4531 | 2.54E-12   |
| AT3G13650 | 42.40192903 | 116.2836166 | -1.4554 | 1.08E-06   |
| AT1G72680 | 32.63265593 | 89.64409715 | -1.4579 | 2.59E-05   |
| AT5G40690 | 50.57035486 | 139.2114569 | -1.4609 | 6.00E-08   |
| AT1G79245 | 750.4689918 | 2067.311278 | -1.4619 | 2.91E-112  |
| AT5G27920 | 50.2830233  | 138.6476576 | -1.4633 | 6.13E-08   |
| AT1G77220 | 27.33754573 | 75.40816348 | -1.4638 | 0.00013565 |
| AT3G55880 | 27.41964046 | 75.69006316 | -1.4649 | 0.00012961 |
| AT2G42330 | 24.91575114 | 68.92447092 | -1.468  | 0.00028885 |
| AT4G05050 | 641.7755667 | 1777.142544 | -1.4694 | 2.24E-97   |
| AT3G24070 | 33.04312959 | 91.5704116  | -1.4705 | 1.74E-05   |
| AT5G43830 | 133.5270815 | 370.4631583 | -1.4722 | 1.40E-20   |
| AT3G54640 | 85.13223699 | 236.8427116 | -1.4762 | 2.21E-13   |
| AT1G08930 | 265.494363  | 739.4228516 | -1.4777 | 5.41E-41   |
| AT1G20780 | 42.11459747 | 117.3172487 | -1.478  | 6.49E-07   |
| AT5G65300 | 52.74586525 | 147.0106813 | -1.4788 | 1.57E-08   |
| AT1G63800 | 38.29719244 | 106.7460109 | -1.4789 | 2.39E-06   |
| AT1G17340 | 33.28941379 | 92.88594343 | -1.4804 | 1.30E-05   |



|           |             |             |         |            |
|-----------|-------------|-------------|---------|------------|
| AT5G57655 | 221.5326341 | 618.7228068 | -1.4818 | 1.57E-34   |
| AT3G22530 | 16.66523058 | 46.60741319 | -1.4837 | 0.0038077  |
| AT2G22850 | 16.58313585 | 46.51344663 | -1.4879 | 0.003749   |
| AT2G43400 | 45.9320025  | 128.9221187 | -1.4889 | 1.26E-07   |
| AT5G04340 | 131.2694763 | 369.0066766 | -1.4911 | 6.12E-21   |
| AT2G18196 | 18.71759888 | 52.62127296 | -1.4913 | 0.0017396  |
| AT1G13210 | 68.95957481 | 194.2758604 | -1.4943 | 2.74E-11   |
| AT3G10985 | 133.0755604 | 375.2554528 | -1.4956 | 2.15E-21   |
| AT4G39090 | 419.2167485 | 1184.354508 | -1.4983 | 4.12E-67   |
| AT1G62770 | 38.87185556 | 110.0348404 | -1.5012 | 1.11E-06   |
| AT4G30280 | 153.4350539 | 435.2061173 | -1.5041 | 5.36E-25   |
| AT4G14040 | 50.93978115 | 144.5205675 | -1.5044 | 1.25E-08   |
| AT1G18270 | 322.9606753 | 916.5967984 | -1.5049 | 2.35E-52   |
| AT5G54640 | 30.8676192  | 87.90571581 | -1.5099 | 1.66E-05   |
| AT5G08500 | 34.35664531 | 97.86617105 | -1.5102 | 4.59E-06   |
| AT1G16370 | 17.65036736 | 50.31909227 | -1.5114 | 0.0020063  |
| AT2G21500 | 28.07639831 | 80.1534747  | -1.5134 | 4.32E-05   |
| AT3G45970 | 94.0395154  | 268.4624586 | -1.5134 | 9.55E-16   |
| AT4G05010 | 21.30358293 | 60.84334686 | -1.514  | 0.00051457 |
| AT3G23080 | 15.6800938  | 44.82204857 | -1.5153 | 0.0038804  |
| AT5G43520 | 31.15495076 | 89.08029779 | -1.5156 | 1.33E-05   |
| AT4G36730 | 55.53708614 | 158.8034845 | -1.5157 | 1.55E-09   |
| AT4G35750 | 293.1192403 | 838.181705  | -1.5158 | 1.73E-48   |
| AT3G10960 | 24.09480382 | 68.92447092 | -1.5163 | 0.00017842 |
| AT1G75220 | 65.75788026 | 188.2150174 | -1.5171 | 3.17E-11   |
| AT2G40000 | 692.2227795 | 1981.707743 | -1.5174 | 1.17E-114  |
| AT3G26460 | 49.05160232 | 140.5269888 | -1.5185 | 1.57E-08   |
| AT3G49590 | 32.71475067 | 93.96655886 | -1.5222 | 6.44E-06   |

|           |             |             |         |            |
|-----------|-------------|-------------|---------|------------|
| AT4G14500 | 46.34247616 | 133.1975972 | -1.5232 | 3.75E-08   |
| AT1G66480 | 34.43874004 | 98.99376975 | -1.5233 | 3.31E-06   |
| AT4G12550 | 20.60577771 | 59.24591536 | -1.5237 | 0.00058304 |
| AT1G78850 | 183.7690574 | 528.7028434 | -1.5246 | 5.42E-31   |
| AT1G53840 | 199.8185775 | 575.1693068 | -1.5253 | 1.01E-33   |
| AT4G11360 | 39.81594498 | 114.6861851 | -1.5263 | 4.04E-07   |
| AT1G13260 | 114.3579616 | 329.6346885 | -1.5273 | 1.63E-19   |
| AT2G25735 | 14.61286228 | 42.19098493 | -1.5297 | 0.0049867  |
| AT3G59350 | 95.51722058 | 276.2146998 | -1.532  | 1.63E-16   |
| AT5G63770 | 41.41679225 | 119.9952957 | -1.5347 | 1.74E-07   |
| AT2G18690 | 152.2446803 | 441.1729938 | -1.535  | 3.36E-26   |
| AT4G00550 | 19.1691199  | 55.58121956 | -1.5358 | 0.00084205 |
| AT5G55700 | 22.00138815 | 63.80329346 | -1.536  | 0.00028934 |
| AT3G20500 | 32.30427701 | 93.82560902 | -1.5383 | 5.27E-06   |
| AT1G57990 | 123.1010505 | 358.3414722 | -1.5415 | 1.70E-21   |
| AT2G41250 | 26.22926685 | 76.58274547 | -1.5458 | 4.77E-05   |
| AT2G41630 | 113.7832984 | 332.406702  | -1.5467 | 4.38E-20   |
| AT1G20440 | 1653.880469 | 4834.25057  | -1.5474 | 1.78E-289  |
| AT3G01830 | 17.03465687 | 49.94322603 | -1.5518 | 0.0015728  |
| AT5G11530 | 27.74801939 | 81.37503997 | -1.5522 | 2.34E-05   |
| AT1G50460 | 57.5073597  | 168.6699731 | -1.5524 | 1.72E-10   |
| AT4G15530 | 115.0557668 | 337.5278794 | -1.5527 | 1.60E-20   |
| AT4G25170 | 58.69773332 | 172.2876857 | -1.5534 | 1.02E-10   |
| AT5G17460 | 62.72037518 | 184.2214386 | -1.5544 | 1.96E-11   |
| AT1G56140 | 93.71113648 | 275.9797834 | -1.5583 | 5.76E-17   |
| AT4G34890 | 114.07063   | 336.0244145 | -1.5586 | 1.47E-20   |
| AT1G53190 | 24.58737221 | 72.49520016 | -1.56   | 7.08E-05   |
| AT1G30320 | 16.33685165 | 48.20484469 | -1.561  | 0.0018627  |

|           |             |             |         |            |
|-----------|-------------|-------------|---------|------------|
| AT4G01120 | 66.98930124 | 197.6586566 | -1.561  | 2.58E-12   |
| AT1G17380 | 17.65036736 | 52.43333984 | -1.5708 | 0.0009755  |
| AT3G43230 | 48.80531812 | 145.4602331 | -1.5755 | 2.48E-09   |
| AT1G20450 | 596.2540379 | 1777.565394 | -1.5759 | 1.44E-109  |
| AT3G59110 | 18.18398312 | 54.26568774 | -1.5774 | 0.00072476 |
| AT5G48970 | 18.43026731 | 55.01742021 | -1.5778 | 0.00065551 |
| AT5G01410 | 101.3459465 | 302.8072359 | -1.5791 | 5.81E-19   |
| AT2G40970 | 29.34886666 | 87.81174925 | -1.5811 | 6.78E-06   |
| AT3G51430 | 18.34817258 | 54.92345365 | -1.5818 | 0.00064379 |
| AT2G44790 | 461.331346  | 1383.187746 | -1.5841 | 4.96E-86   |
| AT2G36310 | 80.37074254 | 241.2121566 | -1.5856 | 2.63E-15   |
| AT5G08660 | 29.88248242 | 89.69108043 | -1.5857 | 4.92E-06   |
| AT1G11100 | 15.3106675  | 45.99663056 | -1.587  | 0.0021109  |
| AT5G54500 | 238.3620541 | 716.6829444 | -1.5882 | 7.70E-45   |
| AT5G13310 | 13.66877286 | 41.1103695  | -1.5886 | 0.0040463  |
| AT5G51440 | 28.32268251 | 85.1806856  | -1.5886 | 8.90E-06   |
| AT1G16670 | 26.68078787 | 80.29442454 | -1.5895 | 1.74E-05   |
| AT1G25220 | 32.96103486 | 99.46360255 | -1.5934 | 1.13E-06   |
| AT5G20910 | 20.31844615 | 61.31317965 | -1.5934 | 0.00024134 |
| AT1G51760 | 50.40616539 | 152.1788421 | -1.5941 | 6.43E-10   |
| AT4G17900 | 68.38491168 | 206.6324629 | -1.5953 | 2.63E-13   |
| AT4G39640 | 32.46846647 | 98.14807072 | -1.5959 | 1.31E-06   |
| AT5G54810 | 148.9608911 | 451.462332  | -1.5997 | 1.08E-28   |
| AT1G54710 | 30.33400344 | 91.94627784 | -1.5999 | 2.99E-06   |
| AT1G35670 | 70.76565891 | 214.5256539 | -1.6    | 7.36E-14   |
| AT1G19530 | 241.153275  | 731.4356941 | -1.6008 | 2.30E-46   |
| AT5G42900 | 17.28094107 | 52.43333984 | -1.6013 | 0.00077683 |
| AT3G50910 | 55.49603877 | 168.5760066 | -1.6029 | 4.99E-11   |

|           |             |             |         |            |
|-----------|-------------|-------------|---------|------------|
| AT1G17170 | 103.2341254 | 313.8483066 | -1.6041 | 3.80E-20   |
| AT1G08720 | 28.07639831 | 85.36861872 | -1.6043 | 7.11E-06   |
| AT1G17060 | 16.21370955 | 49.3324434  | -1.6053 | 0.0011622  |
| AT4G20780 | 35.71120838 | 108.6723253 | -1.6055 | 2.54E-07   |
| AT5G18400 | 60.70905425 | 185.3490373 | -1.6103 | 3.65E-12   |
| AT3G03640 | 44.08487104 | 134.7010621 | -1.6114 | 5.41E-09   |
| AT4G27020 | 34.6029295  | 106.1352282 | -1.6169 | 3.06E-07   |
| AT1G52720 | 22.57605128 | 69.25335388 | -1.6171 | 6.19E-05   |
| AT5G54730 | 49.09264968 | 150.7223604 | -1.6183 | 4.63E-10   |
| AT2G35510 | 43.38706582 | 133.5264801 | -1.6218 | 5.24E-09   |
| AT5G67340 | 15.84428326 | 48.8626106  | -1.6248 | 0.0010808  |
| AT5G17650 | 17.93769892 | 55.44026972 | -1.6279 | 0.00041347 |
| AT1G01650 | 67.522917   | 208.9816269 | -1.6299 | 6.46E-14   |
| AT4G23100 | 237.4590121 | 736.0400555 | -1.6321 | 3.74E-48   |
| AT1G23760 | 15.92637799 | 49.37942668 | -1.6325 | 0.00095147 |
| AT4G28260 | 83.57243709 | 259.4886523 | -1.6346 | 2.97E-17   |
| AT3G17860 | 26.43450368 | 82.26772228 | -1.6379 | 7.38E-06   |
| AT1G62975 | 38.17405034 | 118.9616635 | -1.6398 | 3.19E-08   |
| AT3G12350 | 22.28871971 | 69.53525355 | -1.6414 | 4.64E-05   |
| AT5G60270 | 15.1875254  | 47.40612894 | -1.6422 | 0.0011821  |
| AT4G30780 | 43.30497108 | 135.4997779 | -1.6457 | 2.44E-09   |
| AT4G32070 | 89.68849461 | 280.8190611 | -1.6466 | 7.66E-19   |
| AT1G15530 | 15.26962014 | 47.82897846 | -1.6472 | 0.0010739  |
| AT1G21130 | 20.72891981 | 64.97787545 | -1.6483 | 8.50E-05   |
| AT3G51500 | 18.34817258 | 57.60150058 | -1.6505 | 0.00025169 |
| AT4G33070 | 33.69988745 | 105.8533286 | -1.6513 | 1.86E-07   |
| AT1G29760 | 34.02826638 | 107.0279105 | -1.6532 | 1.52E-07   |
| AT4G30790 | 37.76357668 | 118.8207137 | -1.6537 | 2.57E-08   |

|           |             |             |         |            |
|-----------|-------------|-------------|---------|------------|
| AT1G66580 | 340.9394216 | 1076.997714 | -1.6594 | 2.73E-72   |
| AT1G13195 | 16.95256214 | 53.56093855 | -1.6597 | 0.00042396 |
| AT1G03370 | 54.10042833 | 171.0661204 | -1.6608 | 8.00E-12   |
| AT4G35985 | 49.83150227 | 157.5819192 | -1.661  | 6.22E-11   |
| AT1G59740 | 27.25545099 | 86.30828431 | -1.663  | 2.99E-06   |
| AT2G35800 | 31.89380335 | 101.0140508 | -1.6632 | 3.22E-07   |
| AT3G15070 | 21.46777239 | 68.03178861 | -1.664  | 4.63E-05   |
| AT2G28400 | 15.6800938  | 49.70830963 | -1.6646 | 0.00072232 |
| AT1G02400 | 57.95888073 | 183.939539  | -1.6661 | 9.85E-13   |
| AT1G09940 | 67.2766328  | 214.1497876 | -1.6704 | 8.18E-15   |
| AT1G23390 | 23.1507144  | 73.81073198 | -1.6728 | 1.76E-05   |
| AT1G18570 | 36.03958731 | 114.9680848 | -1.6736 | 3.25E-08   |
| AT4G23730 | 15.47485697 | 49.52037652 | -1.6781 | 0.00067611 |
| AT5G64300 | 86.36365797 | 276.4026329 | -1.6783 | 4.05E-19   |
| AT3G05500 | 81.47902142 | 260.8511674 | -1.6787 | 4.39E-18   |
| AT3G48520 | 83.73662655 | 268.180559  | -1.6793 | 1.38E-18   |
| AT1G10150 | 11.37012037 | 36.45902484 | -1.681  | 0.0047376  |
| AT4G28300 | 83.61348445 | 268.3215088 | -1.6822 | 1.21E-18   |
| AT4G02880 | 37.14786619 | 119.2435632 | -1.6826 | 1.43E-08   |
| AT1G29640 | 16.29580428 | 52.38635656 | -1.6847 | 0.00041722 |
| AT2G41430 | 618.2964734 | 1987.815569 | -1.6848 | 1.22E-136  |
| AT5G01720 | 11.61640457 | 37.35170714 | -1.685  | 0.0040416  |
| AT1G56220 | 137.7139128 | 442.9113752 | -1.6853 | 1.25E-30   |
| AT2G31810 | 94.36789433 | 303.9348346 | -1.6874 | 3.71E-21   |
| AT1G34260 | 26.43450368 | 85.1806856  | -1.6881 | 2.59E-06   |
| AT1G25560 | 47.45075504 | 152.9775578 | -1.6888 | 6.64E-11   |
| AT5G06560 | 34.93130843 | 112.7598706 | -1.6907 | 3.42E-08   |
| AT1G36370 | 77.94894795 | 251.7364112 | -1.6913 | 1.13E-17   |

|           |             |             |         |            |
|-----------|-------------|-------------|---------|------------|
| AT3G53180 | 87.80031578 | 283.8729743 | -1.6929 | 6.71E-20   |
| AT4G29950 | 88.33393154 | 285.6113556 | -1.693  | 5.10E-20   |
| AT5G64410 | 38.05090824 | 123.2841252 | -1.696  | 5.99E-09   |
| AT5G28770 | 36.49110833 | 118.2569143 | -1.6963 | 1.31E-08   |
| AT3G20660 | 28.61001407 | 92.79197687 | -1.6975 | 6.99E-07   |
| AT4G09150 | 74.9935376  | 243.5143373 | -1.6992 | 3.07E-17   |
| AT5G27520 | 30.00562451 | 97.53728809 | -1.7007 | 3.18E-07   |
| AT5G06570 | 29.84143505 | 97.34935497 | -1.7059 | 3.05E-07   |
| ATMG00020 | 18.43026731 | 60.13859767 | -1.7062 | 0.00010473 |
| AT2G41190 | 13.13515711 | 42.89573412 | -1.7074 | 0.0015282  |
| AT3G07310 | 18.55340941 | 60.65541374 | -1.709  | 9.42E-05   |
| AT4G24390 | 12.84782554 | 42.09701837 | -1.7122 | 0.0016847  |
| AT5G47040 | 80.53493201 | 263.9520638 | -1.7126 | 7.26E-19   |
| AT4G34310 | 25.61355636 | 84.00610362 | -1.7136 | 2.26E-06   |
| AT3G28740 | 20.81101454 | 68.40765485 | -1.7168 | 2.58E-05   |
| AT2G46260 | 71.58660623 | 235.3392467 | -1.717  | 5.99E-17   |
| AT3G47950 | 13.21725184 | 43.45953347 | -1.7173 | 0.0013134  |
| AT1G19310 | 15.14647804 | 49.84925947 | -1.7186 | 0.00048075 |
| AT1G14860 | 30.21086134 | 99.60455239 | -1.7211 | 1.70E-07   |
| AT1G08570 | 62.43304362 | 205.9277137 | -1.7218 | 6.02E-15   |
| AT5G18490 | 26.18821948 | 86.59018399 | -1.7253 | 1.30E-06   |
| AT2G02180 | 66.04521182 | 218.754149  | -1.7278 | 6.09E-16   |
| AT4G17090 | 28.97944036 | 95.98683987 | -1.7278 | 2.76E-07   |
| AT3G09370 | 11.00069408 | 36.45902484 | -1.7287 | 0.0036749  |
| AT5G54170 | 28.56896671 | 94.76527461 | -1.7299 | 3.26E-07   |
| AT4G34230 | 120.7203033 | 400.9553066 | -1.7318 | 5.74E-29   |
| AT3G13110 | 67.31768017 | 224.7210255 | -1.7391 | 1.59E-16   |
| AT5G47240 | 11.00069408 | 36.74092451 | -1.7398 | 0.0033219  |

|           |             |             |         |            |
|-----------|-------------|-------------|---------|------------|
| AT5G47370 | 28.28163514 | 94.57734149 | -1.7416 | 2.85E-07   |
| AT3G56040 | 12.72468345 | 42.56685116 | -1.7421 | 0.0012941  |
| AT1G12950 | 32.46846647 | 108.625342  | -1.7422 | 2.86E-08   |
| AT4G14370 | 21.71405659 | 72.68313327 | -1.743  | 9.86E-06   |
| AT1G11185 | 13.70982023 | 46.04361384 | -1.7478 | 0.00071564 |
| AT1G26270 | 167.9247741 | 564.8329853 | -1.75   | 2.40E-41   |
| AT4G38810 | 35.42387682 | 119.1495966 | -1.75   | 4.46E-09   |
| AT3G47160 | 29.10258246 | 98.14807072 | -1.7538 | 1.34E-07   |
| AT1G30420 | 39.03604502 | 131.6941322 | -1.7543 | 5.18E-10   |
| AT3G20340 | 30.621335   | 103.4571813 | -1.7564 | 5.36E-08   |
| AT5G01750 | 104.7939253 | 354.7237597 | -1.7591 | 2.70E-26   |
| AT1G30820 | 163.8610849 | 554.8255468 | -1.7596 | 5.70E-41   |
| AT2G24500 | 71.29927467 | 241.7289727 | -1.7614 | 4.33E-18   |
| AT3G14590 | 42.52507113 | 144.3326344 | -1.763  | 5.24E-11   |
| AT1G76180 | 909.4454401 | 3086.895425 | -1.7631 | 3.81E-228  |
| AT2G27830 | 38.50242927 | 130.7544666 | -1.7638 | 5.03E-10   |
| AT3G14780 | 13.70982023 | 46.60741319 | -1.7653 | 0.00058304 |
| AT5G02160 | 11.00069408 | 37.39869042 | -1.7654 | 0.0026195  |
| AT5G59690 | 76.9227638  | 261.5559166 | -1.7656 | 1.32E-19   |
| AT5G11520 | 125.4817977 | 426.749127  | -1.7659 | 9.02E-32   |
| AT1G55510 | 48.51798656 | 165.1462272 | -1.7672 | 1.45E-12   |
| AT5G43620 | 26.14717211 | 89.26823091 | -1.7715 | 4.55E-07   |
| AT2G38400 | 146.9495701 | 504.3185214 | -1.779  | 6.36E-38   |
| AT4G11850 | 90.38629983 | 310.8413767 | -1.782  | 1.48E-23   |
| AT2G35710 | 33.28941379 | 114.498252  | -1.7822 | 5.50E-09   |
| AT1G15430 | 24.99784587 | 86.12035119 | -1.7846 | 6.55E-07   |
| AT3G07350 | 11.12383617 | 38.33835601 | -1.7851 | 0.0020167  |
| AT4G37790 | 38.13300297 | 131.6001657 | -1.787  | 2.77E-10   |

|           |             |             |         |            |
|-----------|-------------|-------------|---------|------------|
| AT5G13200 | 44.20801313 | 152.7896247 | -1.7892 | 6.96E-12   |
| AT1G80840 | 134.265934  | 464.1948007 | -1.7896 | 2.95E-35   |
| AT3G49570 | 11.00069408 | 38.05645634 | -1.7905 | 0.0020514  |
| AT2G33150 | 266.6847366 | 925.288705  | -1.7948 | 2.43E-70   |
| AT2G02710 | 62.59723308 | 217.2506841 | -1.7952 | 8.70E-17   |
| AT2G36320 | 292.8729561 | 1016.859117 | -1.7958 | 2.36E-77   |
| AT4G30390 | 19.1691199  | 66.57530695 | -1.7962 | 1.58E-05   |
| AT3G25495 | 12.35525715 | 42.9427174  | -1.7973 | 0.00086402 |
| AT5G52660 | 10.87755198 | 37.86852322 | -1.7996 | 0.0020133  |
| AT1G17420 | 9.399846804 | 32.74734576 | -1.8007 | 0.0047016  |
| AT1G62320 | 10.95964671 | 38.19740617 | -1.8013 | 0.0018865  |
| AT3G45300 | 183.5227732 | 639.9592491 | -1.802  | 5.22E-49   |
| AT4G38060 | 43.71544474 | 152.507725  | -1.8027 | 5.38E-12   |
| AT1G66500 | 51.39130218 | 179.3351776 | -1.8031 | 5.07E-14   |
| AT4G17500 | 90.91991559 | 317.6539522 | -1.8048 | 1.53E-24   |
| AT5G13210 | 31.64751915 | 110.6456231 | -1.8058 | 7.12E-09   |
| AT4G36430 | 57.13793341 | 199.8668707 | -1.8065 | 1.25E-15   |
| AT2G23450 | 56.97374395 | 199.3500546 | -1.8069 | 1.35E-15   |
| AT1G78280 | 60.66800688 | 212.364423  | -1.8075 | 1.37E-16   |
| AT5G02810 | 29.96457715 | 105.1015961 | -1.8105 | 1.74E-08   |
| AT1G19400 | 41.70412381 | 146.6817984 | -1.8144 | 1.14E-11   |
| AT4G21830 | 32.71475067 | 115.2030012 | -1.8162 | 2.74E-09   |
| AT4G21850 | 81.72530562 | 287.8665531 | -1.8165 | 1.70E-22   |
| AT2G30140 | 17.32198843 | 61.12524654 | -1.8192 | 3.24E-05   |
| AT1G08800 | 52.49958106 | 185.4430039 | -1.8206 | 1.06E-14   |
| AT5G21170 | 77.0459059  | 272.550004  | -1.8227 | 2.02E-21   |
| AT5G66650 | 67.6460591  | 239.3328254 | -1.8229 | 7.23E-19   |
| AT2G38250 | 17.28094107 | 61.21921309 | -1.8248 | 3.04E-05   |



|           |             |             |         |            |
|-----------|-------------|-------------|---------|------------|
| AT2G15695 | 31.93485071 | 113.2297034 | -1.826  | 3.27E-09   |
| AT4G13830 | 17.4861779  | 62.1118954  | -1.8287 | 2.51E-05   |
| AT4G34410 | 63.2950383  | 224.9559419 | -1.8295 | 7.25E-18   |
| AT2G29440 | 19.74378302 | 70.28698602 | -1.8319 | 5.78E-06   |
| AT4G08555 | 23.72537752 | 84.52291969 | -1.8329 | 4.66E-07   |
| AT2G27150 | 27.66592465 | 98.61790352 | -1.8337 | 3.82E-08   |
| AT2G26660 | 19.94901985 | 71.36760145 | -1.839  | 4.45E-06   |
| AT2G26530 | 82.66939504 | 295.8537106 | -1.8395 | 1.49E-23   |
| AT1G68440 | 234.7498859 | 841.7524342 | -1.8423 | 1.23E-66   |
| AT1G09070 | 423.1572956 | 1519.533223 | -1.8444 | 2.11E-120  |
| AT1G77000 | 18.47131468 | 66.34039055 | -1.8446 | 1.02E-05   |
| AT2G30720 | 10.09765203 | 36.27109172 | -1.8448 | 0.0020758  |
| AT2G34500 | 19.45645146 | 70.14603619 | -1.8501 | 4.91E-06   |
| AT1G67070 | 12.23211505 | 44.21126594 | -1.8537 | 0.00048699 |
| AT5G03030 | 18.47131468 | 66.76324007 | -1.8538 | 8.65E-06   |
| AT1G33590 | 59.14925434 | 214.1028044 | -1.8559 | 2.14E-17   |
| AT5G47860 | 15.59799906 | 56.52088515 | -1.8574 | 5.24E-05   |
| AT5G13740 | 45.39838675 | 164.6294111 | -1.8585 | 1.65E-13   |
| AT3G29160 | 50.48826013 | 183.4227229 | -1.8612 | 4.97E-15   |
| AT3G54130 | 16.95256214 | 61.59507933 | -1.8613 | 2.04E-05   |
| AT4G31780 | 22.49395654 | 81.84487276 | -1.8634 | 5.17E-07   |
| AT5G16110 | 212.4611662 | 773.0628797 | -1.8634 | 2.76E-62   |
| AT3G30775 | 796.6883258 | 2899.244207 | -1.8636 | 1.85E-233  |
| AT5G21940 | 172.1937002 | 627.50868   | -1.8656 | 1.13E-50   |
| AT4G14680 | 19.94901985 | 72.73011655 | -1.8662 | 2.62E-06   |
| AT3G13450 | 44.90581836 | 163.8306954 | -1.8672 | 1.54E-13   |
| AT5G62540 | 36.61425043 | 134.2782126 | -1.8747 | 2.99E-11   |
| AT3G45730 | 42.1966922  | 154.9038723 | -1.8762 | 6.48E-13   |

|           |             |             |         |            |
|-----------|-------------|-------------|---------|------------|
| AT4G11280 | 243.3698328 | 894.6086236 | -1.8781 | 6.32E-73   |
| AT5G11920 | 13.70982023 | 50.50702538 | -1.8813 | 0.00012894 |
| AT5G60200 | 19.0459778  | 70.24000274 | -1.8828 | 3.46E-06   |
| AT2G40420 | 22.20662498 | 81.9858226  | -1.8844 | 3.92E-07   |
| AT3G59930 | 73.1874535  | 270.2478233 | -1.8846 | 2.42E-22   |
| AT5G35110 | 9.194609974 | 33.96891103 | -1.8854 | 0.0025354  |
| AT3G62770 | 37.96881351 | 140.2920724 | -1.8855 | 7.86E-12   |
| AT4G03430 | 99.29357825 | 368.067011  | -1.8902 | 1.89E-30   |
| AT5G28050 | 240.9890855 | 894.4676737 | -1.8921 | 9.81E-74   |
| AT2G29670 | 9.687178366 | 36.03617532 | -1.8953 | 0.0016564  |
| AT1G03740 | 57.91783336 | 215.559286  | -1.896  | 4.50E-18   |
| AT1G70700 | 11.86268876 | 44.21126594 | -1.898  | 0.00036656 |
| AT2G34600 | 8.455757387 | 31.5257805  | -1.8985 | 0.0036772  |
| AT1G72360 | 27.1323089  | 101.389917  | -1.9018 | 8.30E-09   |
| AT1G53440 | 32.6737033  | 122.579376  | -1.9075 | 1.41E-10   |
| AT5G13700 | 12.92992028 | 48.53372765 | -1.9083 | 0.00015268 |
| AT2G43140 | 21.50881976 | 80.76425734 | -1.9088 | 3.66E-07   |
| AT3G53650 | 10.09765203 | 37.9155065  | -1.9088 | 0.0010827  |
| AT4G20830 | 439.3299578 | 1651.368305 | -1.9103 | 5.34E-138  |
| AT1G09950 | 13.13515711 | 49.42640996 | -1.9118 | 0.00012592 |
| AT5G66850 | 31.68856652 | 119.384513  | -1.9136 | 2.33E-10   |
| AT5G20010 | 214.2262029 | 810.1796705 | -1.9191 | 3.09E-68   |
| AT1G55920 | 75.85553229 | 286.9268875 | -1.9194 | 2.36E-24   |
| AT1G58200 | 21.26253557 | 80.48235766 | -1.9204 | 3.37E-07   |
| AT5G17490 | 8.291567923 | 31.38483066 | -1.9204 | 0.0034196  |
| AT5G58650 | 13.95610442 | 52.95015591 | -1.9237 | 5.92E-05   |
| AT1G22830 | 9.03042051  | 34.29779398 | -1.9253 | 0.0019629  |
| AT5G22290 | 17.85560419 | 67.84385549 | -1.9258 | 3.48E-06   |

|           |             |             |         |            |
|-----------|-------------|-------------|---------|------------|
| AT1G72330 | 13.17620447 | 50.13115915 | -1.9278 | 9.78E-05   |
| AT4G33030 | 16.37789902 | 62.3468118  | -1.9286 | 9.57E-06   |
| AT4G32190 | 18.47131468 | 70.42793586 | -1.9309 | 2.04E-06   |
| AT3G23250 | 76.01972175 | 289.9338173 | -1.9313 | 7.84E-25   |
| AT3G62150 | 38.29719244 | 146.1649823 | -1.9323 | 9.60E-13   |
| AT3G14260 | 11.28802564 | 43.17763379 | -1.9355 | 0.00034956 |
| AT5G64310 | 134.8405972 | 516.1113245 | -1.9364 | 3.93E-44   |
| AT3G06420 | 34.15140848 | 130.8484332 | -1.9379 | 1.64E-11   |
| AT5G21990 | 63.74655933 | 244.3600363 | -1.9386 | 4.26E-21   |
| AT5G16650 | 15.14647804 | 58.07133337 | -1.9388 | 1.98E-05   |
| AT3G54150 | 15.80323589 | 60.60843046 | -1.9393 | 1.21E-05   |
| AT3G06780 | 22.61709864 | 86.91906694 | -1.9423 | 7.51E-08   |
| AT5G07440 | 816.226872  | 3137.8253   | -1.9427 | 4.40E-269  |
| AT3G13080 | 65.3474066  | 251.6424446 | -1.9452 | 8.01E-22   |
| AT1G77680 | 25.81879319 | 99.46360255 | -1.9457 | 6.24E-09   |
| AT3G13520 | 134.9637393 | 521.0915521 | -1.949  | 5.58E-45   |
| AT1G28480 | 19.292262   | 74.56246445 | -1.9504 | 7.41E-07   |
| AT2G16060 | 16.21370955 | 62.72267804 | -1.9518 | 7.17E-06   |
| AT2G19810 | 13.70982023 | 53.13808903 | -1.9545 | 4.50E-05   |
| AT5G27610 | 9.810320463 | 38.05645634 | -1.9558 | 0.00081694 |
| AT5G46710 | 11.49326247 | 44.63411546 | -1.9574 | 0.0002305  |
| AT5G46910 | 33.24836642 | 129.1570351 | -1.9578 | 1.55E-11   |
| AT2G20562 | 8.045283727 | 31.2908641  | -1.9595 | 0.0029221  |
| AT2G25460 | 105.1223042 | 409.4592802 | -1.9617 | 9.55E-36   |
| AT3G29240 | 77.98999532 | 304.3107009 | -1.9642 | 1.08E-26   |
| AT3G14770 | 55.9475598  | 218.5192326 | -1.9656 | 2.68E-19   |
| AT1G05060 | 11.78059403 | 46.1375804  | -1.9695 | 0.00015729 |
| AT1G32170 | 113.0854932 | 443.4751745 | -1.9714 | 5.57E-39   |

|           |             |             |         |            |
|-----------|-------------|-------------|---------|------------|
| AT5G55970 | 19.70273566 | 77.28749466 | -1.9718 | 3.42E-07   |
| AT4G29670 | 55.20870721 | 216.6399014 | -1.9723 | 3.14E-19   |
| AT4G32870 | 31.89380335 | 125.5863059 | -1.9773 | 2.16E-11   |
| AT3G57750 | 9.276704706 | 36.55299139 | -1.9783 | 0.00096468 |
| AT4G13110 | 8.045283727 | 31.76069689 | -1.981  | 0.002429   |
| AT3G03990 | 108.3650461 | 429.7090736 | -1.9875 | 3.15E-38   |
| AT3G14075 | 20.76996717 | 82.54962195 | -1.9908 | 9.67E-08   |
| AT1G73080 | 69.28795373 | 275.415984  | -1.9909 | 1.11E-24   |
| AT2G16900 | 64.19808035 | 255.3071404 | -1.9916 | 6.46E-23   |
| AT5G42940 | 58.86192278 | 234.3056145 | -1.993  | 4.47E-21   |
| AT5G43190 | 25.53146162 | 101.8127665 | -1.9956 | 1.89E-09   |
| AT4G21680 | 16.74732531 | 66.90418991 | -1.9982 | 2.05E-06   |
| AT5G13820 | 22.16557762 | 88.610465   | -1.9992 | 2.57E-08   |
| AT4G37610 | 79.26246366 | 316.9022197 | -1.9993 | 1.61E-28   |
| AT5G38710 | 14.12029389 | 56.61485171 | -2.0034 | 1.53E-05   |
| AT1G26250 | 74.33677975 | 298.0619247 | -2.0035 | 6.48E-27   |
| AT5G54080 | 54.71613882 | 219.599848  | -2.0048 | 5.92E-20   |
| AT3G46930 | 27.37859309 | 109.9408739 | -2.0056 | 3.11E-10   |
| AT5G16970 | 34.80816633 | 140.1981058 | -2.01   | 5.95E-13   |
| AT3G07565 | 19.1691199  | 77.24051138 | -2.0106 | 2.22E-07   |
| AT4G15260 | 13.46353603 | 54.31267102 | -2.0122 | 2.26E-05   |
| AT1G64660 | 283.6783461 | 1146.767884 | -2.0152 | 9.14E-104  |
| AT1G21400 | 107.4209567 | 435.8169    | -2.0204 | 1.06E-39   |
| AT5G51130 | 10.01555729 | 40.6405367  | -2.0207 | 0.00034109 |
| AT4G04610 | 128.9297765 | 523.8165823 | -2.0225 | 9.55E-48   |
| AT4G22530 | 10.67231515 | 43.45953347 | -2.0258 | 0.00018637 |
| AT4G34350 | 129.8328185 | 529.3606093 | -2.0276 | 2.03E-48   |
| AT2G30870 | 573.6779866 | 2339.297483 | -2.0278 | 1.50E-213  |

|           |             |             |         |            |
|-----------|-------------|-------------|---------|------------|
| AT5G47220 | 22.98652494 | 93.82560902 | -2.0292 | 5.84E-09   |
| AT1G78895 | 19.99006722 | 81.84487276 | -2.0336 | 6.62E-08   |
| AT5G16010 | 45.15210255 | 184.9261878 | -2.0341 | 3.11E-17   |
| AT3G08860 | 40.18537127 | 165.0992439 | -2.0386 | 1.76E-15   |
| AT5G19230 | 73.1874535  | 301.4917041 | -2.0425 | 5.38E-28   |
| AT2G38870 | 25.12098796 | 103.5511479 | -2.0434 | 6.39E-10   |
| AT5G66700 | 8.866231046 | 36.55299139 | -2.0436 | 0.00068534 |
| AT5G18630 | 47.45075504 | 196.8599408 | -2.0527 | 1.51E-18   |
| AT2G15890 | 46.87609192 | 194.7456932 | -2.0547 | 2.24E-18   |
| AT4G21990 | 232.6154229 | 966.7749408 | -2.0552 | 4.85E-90   |
| AT3G48390 | 11.61640457 | 48.29881125 | -2.0558 | 5.58E-05   |
| AT1G03905 | 24.66946694 | 102.6584655 | -2.0571 | 6.26E-10   |
| AT5G02230 | 52.86900735 | 220.9623631 | -2.0633 | 6.55E-21   |
| AT1G32200 | 13.91505706 | 58.16529993 | -2.0635 | 6.68E-06   |
| AT1G25230 | 24.71051431 | 103.5041646 | -2.0665 | 4.54E-10   |
| AT2G17280 | 17.93769892 | 75.22023036 | -2.0681 | 1.77E-07   |
| AT1G29400 | 94.24475223 | 395.5052462 | -2.0692 | 2.55E-37   |
| AT3G23920 | 95.51722058 | 401.0492732 | -2.0699 | 7.39E-38   |
| AT1G70290 | 94.12161014 | 396.1630121 | -2.0735 | 1.72E-37   |
| AT5G35735 | 152.6962014 | 642.8252291 | -2.0738 | 1.10E-60   |
| AT5G52750 | 9.728225732 | 40.96941966 | -2.0743 | 0.00023237 |
| AT5G22220 | 6.895957481 | 29.12963325 | -2.0787 | 0.0026834  |
| AT5G07460 | 18.06084102 | 76.62972875 | -2.085  | 1.09E-07   |
| AT5G10695 | 39.98013444 | 169.985505  | -2.0881 | 1.81E-16   |
| AT2G05520 | 17.81455682 | 75.78402972 | -2.0888 | 1.26E-07   |
| AT1G53920 | 11.16488354 | 47.5000955  | -2.089  | 5.24E-05   |
| AT2G19800 | 141.2850336 | 603.5941908 | -2.095  | 8.00E-58   |
| AT3G11170 | 22.45290918 | 96.55063922 | -2.1044 | 1.15E-09   |

|           |             |             |         |            |
|-----------|-------------|-------------|---------|------------|
| AT4G17615 | 32.96103486 | 142.1714035 | -2.1088 | 4.95E-14   |
| AT1G19380 | 54.59299672 | 235.8090794 | -2.1108 | 5.09E-23   |
| AT3G01970 | 20.72891981 | 89.59711387 | -2.1118 | 4.74E-09   |
| AT2G20670 | 83.98291075 | 363.697566  | -2.1146 | 2.06E-35   |
| AT3G02550 | 19.66168829 | 85.22766888 | -2.1159 | 1.16E-08   |
| AT5G57660 | 12.43735188 | 53.98378806 | -2.1178 | 1.05E-05   |
| AT1G58180 | 48.27170236 | 209.9212925 | -2.1206 | 1.15E-20   |
| AT3G17790 | 26.80392997 | 116.9413825 | -2.1253 | 9.34E-12   |
| AT1G23870 | 123.0189558 | 538.5223488 | -2.1301 | 8.01E-53   |
| AT5G47450 | 28.56896671 | 125.1164731 | -2.1308 | 1.39E-12   |
| AT1G09932 | 13.99715179 | 61.40714621 | -2.1333 | 1.83E-06   |
| AT2G35390 | 19.00493044 | 83.72420394 | -2.1393 | 1.21E-08   |
| AT2G25900 | 65.79892763 | 289.8868341 | -2.1394 | 9.53E-29   |
| AT5G40010 | 7.51166797  | 33.123212   | -2.1406 | 0.00086603 |
| AT1G54100 | 330.3902486 | 1457.468311 | -2.1412 | 8.91E-144  |
| AT3G12580 | 306.2954448 | 1355.655545 | -2.146  | 3.54E-134  |
| AT5G58787 | 15.72114116 | 69.72318667 | -2.1489 | 2.48E-07   |
| AT3G55840 | 12.02687823 | 53.37300543 | -2.1498 | 9.33E-06   |
| AT2G15480 | 51.92491793 | 231.2047181 | -2.1547 | 3.15E-23   |
| AT4G23060 | 7.265383774 | 32.41846281 | -2.1577 | 0.00093249 |
| AT2G38290 | 18.34817258 | 81.89185604 | -2.1581 | 1.45E-08   |
| AT4G36500 | 85.21433172 | 381.2693126 | -2.1616 | 2.91E-38   |
| AT4G12400 | 37.84567141 | 169.4686889 | -2.1628 | 3.10E-17   |
| AT4G21410 | 57.30212287 | 256.7636221 | -2.1638 | 6.64E-26   |
| AT1G76070 | 29.38991402 | 131.9290486 | -2.1664 | 1.52E-13   |
| AT5G43450 | 6.854910115 | 30.77404803 | -2.1665 | 0.0012891  |
| AT4G26260 | 18.84074097 | 84.80481937 | -2.1703 | 6.46E-09   |
| AT1G11960 | 35.75225575 | 161.0116986 | -2.1711 | 1.76E-16   |

|           |             |             |         |            |
|-----------|-------------|-------------|---------|------------|
| AT5G05850 | 7.30643114  | 33.02924544 | -2.1765 | 0.00074641 |
| AT5G15120 | 6.198152259 | 28.0960011  | -2.1805 | 0.002218   |
| AT1G69890 | 82.50520557 | 374.78562   | -2.1835 | 3.81E-38   |
| AT3G19210 | 7.183289042 | 32.6533792  | -2.1845 | 0.00078246 |
| AT5G16120 | 46.34247616 | 210.9549246 | -2.1865 | 1.19E-21   |
| AT1G15030 | 17.73246209 | 80.81124062 | -2.1882 | 1.30E-08   |
| AT2G43510 | 6.321294357 | 28.84773357 | -2.1902 | 0.0018028  |
| AT5G65110 | 114.3579616 | 522.2191508 | -2.1911 | 2.77E-53   |
| AT3G03150 | 33.00208223 | 150.7693437 | -2.1917 | 1.16E-15   |
| AT4G18510 | 14.24343599 | 65.16580857 | -2.1938 | 4.46E-07   |
| AT4G23550 | 14.28448335 | 65.58865808 | -2.199  | 3.87E-07   |
| AT3G51450 | 8.578899485 | 39.41897144 | -2.2    | 0.00015595 |
| AT3G43430 | 36.5321557  | 167.8712574 | -2.2001 | 1.78E-17   |
| AT1G20630 | 38.99499766 | 179.241211  | -2.2005 | 1.26E-18   |
| AT5G15870 | 33.82302955 | 155.5146549 | -2.201  | 3.12E-16   |
| AT3G22890 | 254.16529   | 1169.695725 | -2.2023 | 4.93E-120  |
| AT4G19870 | 5.746631234 | 26.54555288 | -2.2077 | 0.0028165  |
| AT3G02840 | 24.62841957 | 114.4512687 | -2.2163 | 3.53E-12   |
| AT3G60140 | 133.0755604 | 618.8167733 | -2.2173 | 3.69E-64   |
| AT1G05340 | 71.87393779 | 334.4739662 | -2.2184 | 7.91E-35   |
| AT1G13990 | 22.04243552 | 102.7994154 | -2.2215 | 5.06E-11   |
| AT2G31945 | 9.112515242 | 42.51986788 | -2.2222 | 6.68E-05   |
| AT5G04040 | 58.04097546 | 271.4224053 | -2.2254 | 1.94E-28   |
| AT4G18250 | 8.784136315 | 41.1103695  | -2.2265 | 9.03E-05   |
| AT5G60800 | 10.34393622 | 48.48674437 | -2.2288 | 1.60E-05   |
| AT4G38940 | 17.56827263 | 82.59660523 | -2.2331 | 5.07E-09   |
| AT2G43500 | 5.17196811  | 24.38432202 | -2.2372 | 0.0041391  |
| AT4G35110 | 9.974509927 | 47.12422927 | -2.2402 | 2.03E-05   |

|           |             |             |         |            |
|-----------|-------------|-------------|---------|------------|
| AT5G45350 | 54.59299672 | 258.0321706 | -2.2408 | 2.67E-27   |
| AT2G47550 | 28.77420354 | 136.3924602 | -2.2449 | 1.13E-14   |
| AT4G18340 | 71.05299047 | 336.8701135 | -2.2452 | 1.21E-35   |
| AT4G39780 | 12.84782554 | 60.93731342 | -2.2458 | 7.48E-07   |
| AT1G14870 | 192.7994779 | 915.6571328 | -2.2477 | 1.17E-96   |
| AT4G39230 | 15.4338096  | 73.48184902 | -2.2513 | 3.59E-08   |
| AT3G57520 | 643.6637456 | 3066.927531 | -2.2524 | 0          |
| AT5G51260 | 5.58244177  | 26.63951944 | -2.2546 | 0.0023221  |
| AT2G04050 | 10.59022042 | 50.74194178 | -2.2604 | 7.45E-06   |
| AT3G10020 | 95.27093638 | 457.1003256 | -2.2624 | 9.17E-49   |
| AT2G40880 | 8.332615289 | 40.02975407 | -2.2642 | 9.36E-05   |
| AT2G45180 | 7.7169048   | 37.06980747 | -2.2642 | 0.00019066 |
| AT4G33666 | 9.276704706 | 44.58713218 | -2.2649 | 3.15E-05   |
| AT3G04320 | 13.54563077 | 65.11882529 | -2.2652 | 2.32E-07   |
| AT3G16330 | 8.743088949 | 42.42590132 | -2.2787 | 4.85E-05   |
| AT5G19120 | 94.08056277 | 457.9460246 | -2.2832 | 1.88E-49   |
| AT4G30490 | 22.12453025 | 108.5783588 | -2.295  | 4.06E-12   |
| AT1G17300 | 10.67231515 | 52.38635656 | -2.2953 | 3.90E-06   |
| AT1G19540 | 5.910820698 | 29.03566669 | -2.2964 | 0.0011084  |
| AT1G33600 | 7.7169048   | 37.96248978 | -2.2985 | 0.00012757 |
| AT5G14730 | 27.74801939 | 136.6273766 | -2.2998 | 3.64E-15   |
| AT1G03090 | 147.5652806 | 727.5830652 | -2.3018 | 2.51E-79   |
| AT4G34030 | 98.0211099  | 486.089009  | -2.3101 | 2.70E-53   |
| AT1G28190 | 11.8216414  | 58.72909928 | -2.3126 | 7.20E-07   |
| AT4G36790 | 19.33330937 | 96.08080643 | -2.3132 | 6.83E-11   |
| AT5G20250 | 882.3131312 | 4399.702219 | -2.318  | 0          |
| AT3G13100 | 8.866231046 | 44.3052325  | -2.3211 | 2.37E-05   |
| AT1G04310 | 18.22503048 | 91.14756209 | -2.3223 | 2.08E-10   |



|           |             |             |         |           |
|-----------|-------------|-------------|---------|-----------|
| AT3G05390 | 7.675857434 | 38.62025569 | -2.331  | 9.08E-05  |
| AT3G43190 | 12.88887291 | 64.88390889 | -2.3317 | 1.33E-07  |
| AT1G76650 | 89.81163671 | 452.4019976 | -2.3326 | 2.91E-50  |
| AT3G01650 | 30.9907613  | 156.2663874 | -2.3341 | 1.29E-17  |
| AT5G02970 | 29.43096139 | 148.7960459 | -2.3379 | 7.80E-17  |
| AT4G38470 | 193.825662  | 981.95054   | -2.3409 | 1.94E-109 |
| AT3G47040 | 4.392068157 | 22.36404101 | -2.3482 | 0.0046725 |
| AT1G10070 | 119.6530718 | 610.6416827 | -2.3515 | 1.64E-68  |
| AT4G19720 | 9.44089417  | 48.25182797 | -2.3536 | 7.12E-06  |
| AT3G15450 | 624.5767204 | 3200.078145 | -2.3572 | 0         |
| AT5G24490 | 30.90866656 | 158.4276182 | -2.3577 | 4.37E-18  |
| AT2G16660 | 43.75649211 | 224.6740422 | -2.3603 | 1.64E-25  |
| AT1G27760 | 135.1689761 | 696.1512513 | -2.3646 | 1.16E-78  |
| AT4G15610 | 296.3209348 | 1527.80228  | -2.3662 | 1.31E-172 |
| AT4G05320 | 1192.138649 | 6147.527197 | -2.3665 | 0         |
| AT5G54940 | 268.0803471 | 1383.516629 | -2.3676 | 1.89E-156 |
| AT4G15760 | 44.70058153 | 232.1443837 | -2.3767 | 1.41E-26  |
| AT5G63130 | 10.13869939 | 52.85618936 | -2.3822 | 1.83E-06  |
| AT3G09940 | 62.51513835 | 327.1915579 | -2.3879 | 1.43E-37  |
| AT3G19970 | 19.4154041  | 101.7657832 | -2.39   | 5.47E-12  |
| AT2G42270 | 57.58945444 | 302.2904198 | -2.3921 | 8.07E-35  |
| AT4G12120 | 13.87400969 | 73.05899951 | -2.3967 | 8.66E-09  |
| AT1G80380 | 309.3329498 | 1629.66203  | -2.3973 | 2.79E-187 |
| AT1G07040 | 34.56188213 | 182.4830573 | -2.4005 | 3.08E-21  |
| AT2G03760 | 22.61709864 | 119.4314963 | -2.4007 | 4.63E-14  |
| AT5G42380 | 73.26954823 | 388.2698212 | -2.4058 | 5.89E-45  |
| AT2G36950 | 67.522917   | 363.2277333 | -2.4274 | 1.50E-42  |
| AT5G19110 | 18.14293575 | 97.86617105 | -2.4314 | 8.49E-12  |

|           |             |             |         |            |
|-----------|-------------|-------------|---------|------------|
| AT5G05730 | 32.7968454  | 176.9860136 | -2.432  | 5.89E-21   |
| AT1G13480 | 9.522988902 | 51.39970769 | -2.4323 | 1.85E-06   |
| AT5G38200 | 13.58667813 | 73.48184902 | -2.4352 | 5.25E-09   |
| AT4G15130 | 13.34039394 | 72.21330048 | -2.4365 | 7.19E-09   |
| AT3G14050 | 40.96527122 | 221.9959953 | -2.4381 | 2.83E-26   |
| AT5G53050 | 7.10119431  | 38.66723897 | -2.445  | 4.85E-05   |
| AT5G54490 | 16.41894638 | 89.78504699 | -2.4511 | 5.67E-11   |
| AT1G70670 | 36.81948726 | 201.5112855 | -2.4523 | 4.59E-24   |
| AT4G32480 | 71.70974832 | 394.5185974 | -2.4599 | 5.26E-47   |
| AT4G25110 | 3.899499766 | 21.4713587  | -2.4611 | 0.004166   |
| AT2G41880 | 12.51944662 | 69.06542076 | -2.4638 | 1.28E-08   |
| AT4G05120 | 7.51166797  | 41.48623573 | -2.4654 | 2.05E-05   |
| AT5G63790 | 142.3933125 | 788.6613285 | -2.4695 | 3.12E-94   |
| AT1G11260 | 174.5744474 | 966.9628739 | -2.4696 | 1.68E-115  |
| AT3G02555 | 6.157104893 | 34.2508107  | -2.4758 | 0.00013459 |
| AT1G60730 | 45.27524465 | 252.1122774 | -2.4773 | 2.05E-30   |
| AT4G18950 | 121.2128717 | 677.7338057 | -2.4832 | 1.45E-81   |
| AT2G02230 | 27.87116148 | 155.8435379 | -2.4833 | 5.44E-19   |
| AT4G39660 | 173.8766422 | 973.4935497 | -2.4851 | 3.33E-117  |
| AT5G06730 | 6.649673285 | 37.25774059 | -2.4862 | 5.69E-05   |
| AT1G72900 | 31.23704549 | 175.1066824 | -2.4869 | 2.53E-21   |
| AT4G20070 | 29.59515085 | 166.8846085 | -2.4954 | 1.95E-20   |
| AT3G26910 | 26.96811943 | 152.2728086 | -2.4973 | 1.06E-18   |
| AT5G11070 | 41.25260279 | 233.3189656 | -2.4997 | 1.74E-28   |
| AT4G35770 | 130.1201501 | 740.8793333 | -2.5094 | 2.37E-90   |
| AT4G36670 | 15.5569517  | 88.89236468 | -2.5145 | 3.30E-11   |
| AT1G28760 | 7.224336408 | 41.3452859  | -2.5168 | 1.60E-05   |
| AT1G56660 | 657.2914711 | 3779.898797 | -2.5237 | 0          |

|           |             |             |         |            |
|-----------|-------------|-------------|---------|------------|
| AT3G53620 | 53.36157574 | 307.1766809 | -2.5252 | 7.02E-38   |
| AT5G40780 | 36.49110833 | 210.0622423 | -2.5252 | 5.32E-26   |
| AT5G20830 | 53.11529155 | 306.8477979 | -2.5303 | 6.21E-38   |
| AT1G68290 | 3.899499766 | 22.55197413 | -2.5319 | 0.0025495  |
| AT3G60450 | 56.52222292 | 328.4601065 | -2.5388 | 9.59E-41   |
| AT1G65390 | 4.351020791 | 25.37097089 | -2.5438 | 0.0011297  |
| AT5G17850 | 18.59445678 | 108.5783588 | -2.5458 | 8.77E-14   |
| AT4G37030 | 4.966731281 | 29.03566669 | -2.5475 | 0.00041029 |
| AT1G67810 | 16.41894638 | 96.55063922 | -2.5559 | 2.28E-12   |
| AT1G08310 | 3.44797874  | 20.29677671 | -2.5574 | 0.004364   |
| AT4G36040 | 135.7025918 | 801.0649142 | -2.5615 | 3.37E-100  |
| AT5G27760 | 55.41394404 | 328.7420062 | -2.5686 | 2.33E-41   |
| AT1G06570 | 64.23912772 | 381.9270785 | -2.5718 | 4.16E-48   |
| AT1G68390 | 3.981594498 | 23.67957283 | -2.5722 | 0.0016533  |
| AT1G11210 | 21.63196186 | 128.6872024 | -2.5726 | 1.83E-16   |
| AT2G32140 | 9.071467876 | 54.03077134 | -2.5744 | 3.22E-07   |
| AT5G04250 | 10.63126778 | 63.33346067 | -2.5747 | 2.30E-08   |
| AT1G68500 | 7.429573238 | 44.35221578 | -2.5777 | 4.84E-06   |
| AT5G01810 | 138.0833391 | 829.9596311 | -2.5875 | 4.36E-105  |
| AT4G24960 | 48.31274973 | 290.4506334 | -2.5878 | 6.32E-37   |
| AT5G48180 | 165.5850743 | 995.4817245 | -2.5878 | 4.71E-126  |
| AT5G50450 | 4.392068157 | 26.45158632 | -2.5904 | 0.00071606 |
| AT5G49700 | 9.23565734  | 55.86311924 | -2.5966 | 1.62E-07   |
| AT1G02660 | 32.9199875  | 199.5379877 | -2.5996 | 1.31E-25   |
| AT5G65280 | 17.03465687 | 103.2692482 | -2.5999 | 1.82E-13   |
| AT2G28210 | 3.612168204 | 21.98817477 | -2.6058 | 0.0023975  |
| AT1G01470 | 167.5143005 | 1021.510461 | -2.6083 | 1.39E-130  |
| AT3G59480 | 5.869773332 | 35.8482422  | -2.6105 | 4.56E-05   |

|           |             |             |         |            |
|-----------|-------------|-------------|---------|------------|
| AT3G47420 | 33.82302955 | 206.9143626 | -2.613  | 1.07E-26   |
| AT1G71695 | 14.36657808 | 87.99968237 | -2.6148 | 1.26E-11   |
| AT4G36880 | 3.242741911 | 19.8739272  | -2.6156 | 0.0042011  |
| AT1G08630 | 37.96881351 | 233.2719824 | -2.6191 | 3.72E-30   |
| AT1G68410 | 79.05722683 | 486.089009  | -2.6203 | 1.47E-62   |
| AT1G76680 | 180.2800313 | 1112.141207 | -2.625  | 2.98E-143  |
| AT5G20790 | 6.075010161 | 37.49265698 | -2.6256 | 2.65E-05   |
| AT2G34790 | 16.17266219 | 100.6851678 | -2.6382 | 2.29E-13   |
| AT5G62520 | 40.30851337 | 250.9846787 | -2.6384 | 1.04E-32   |
| AT5G02320 | 7.10119431  | 44.25824922 | -2.6398 | 3.46E-06   |
| AT2G22880 | 29.0615351  | 181.4964084 | -2.6428 | 8.75E-24   |
| AT5G23360 | 10.91859934 | 68.40765485 | -2.6474 | 2.78E-09   |
| AT5G22920 | 60.87324371 | 382.021045  | -2.6498 | 7.22E-50   |
| AT1G67850 | 7.798999532 | 49.14451028 | -2.6557 | 7.50E-07   |
| AT1G76410 | 19.12807254 | 120.7470281 | -2.6582 | 4.37E-16   |
| AT1G74360 | 12.68363608 | 80.24744126 | -2.6615 | 7.24E-11   |
| AT4G22212 | 174.2871158 | 1103.120418 | -2.6621 | 1.75E-144  |
| AT1G23550 | 4.843589183 | 30.72706475 | -2.6654 | 0.00015818 |
| AT3G26740 | 11.5753572  | 73.57581558 | -2.6682 | 4.99E-10   |
| AT5G66050 | 39.69280288 | 253.051943  | -2.6725 | 1.76E-33   |
| AT5G54710 | 3.119599813 | 20.01487704 | -2.6816 | 0.0034028  |
| AT2G23120 | 356.0448523 | 2288.038725 | -2.684  | 7.69E-303  |
| AT4G03960 | 8.619946851 | 55.39328645 | -2.684  | 9.75E-08   |
| AT5G23510 | 20.23635142 | 130.2846339 | -2.6866 | 1.57E-17   |
| AT5G25250 | 11.41116774 | 73.48184902 | -2.6869 | 4.27E-10   |
| AT3G15630 | 55.16765984 | 356.2742079 | -2.6911 | 2.09E-47   |
| AT2G29500 | 7.265383774 | 47.03026271 | -2.6945 | 1.10E-06   |
| AT1G14640 | 3.530073472 | 22.97482364 | -2.7023 | 0.0013542  |

|           |             |             |         |            |
|-----------|-------------|-------------|---------|------------|
| AT3G03110 | 19.78483039 | 129.0160853 | -2.7051 | 1.67E-17   |
| AT2G32020 | 22.78128811 | 149.3598453 | -2.7129 | 2.98E-20   |
| AT5G51830 | 42.4429764  | 282.1815762 | -2.733  | 2.79E-38   |
| AT5G02580 | 6.033962796 | 40.12372063 | -2.7333 | 6.99E-06   |
| AT5G50720 | 7.881094264 | 52.43333984 | -2.734  | 1.67E-07   |
| AT1G67480 | 218.5361763 | 1457.750211 | -2.7378 | 2.44E-197  |
| AT3G49160 | 9.112515242 | 60.89033014 | -2.7403 | 1.20E-08   |
| AT4G02520 | 166.0776427 | 1123.088311 | -2.7575 | 2.42E-153  |
| AT1G67980 | 14.07924652 | 95.28209068 | -2.7586 | 2.46E-13   |
| AT5G57500 | 2.832268251 | 19.21616129 | -2.7623 | 0.0035204  |
| AT2G35980 | 16.62418321 | 112.994787  | -2.7649 | 8.96E-16   |
| AT1G80820 | 35.09549789 | 238.6280762 | -2.7654 | 7.21E-33   |
| AT3G16150 | 61.07848054 | 415.8020229 | -2.7672 | 4.26E-57   |
| AT5G52760 | 3.65321557  | 24.94812138 | -2.7717 | 0.00061059 |
| AT2G32120 | 5.623489136 | 38.47930585 | -2.7745 | 9.39E-06   |
| AT4G28350 | 11.20593091 | 77.14654482 | -2.7833 | 5.34E-11   |
| AT5G28610 | 26.55764577 | 183.0938399 | -2.7854 | 1.68E-25   |
| AT2G20500 | 4.145783962 | 28.61281717 | -2.7869 | 0.00018839 |
| AT3G19930 | 88.7444052  | 612.6619637 | -2.7874 | 9.17E-85   |
| AT1G61360 | 24.34108801 | 168.1061738 | -2.7879 | 1.83E-23   |
| AT2G45170 | 50.11883383 | 346.2197861 | -2.7883 | 5.24E-48   |
| AT5G64810 | 6.075010161 | 42.28495148 | -2.7992 | 2.56E-06   |
| AT3G17770 | 51.10397061 | 356.6030909 | -2.8028 | 1.03E-49   |
| AT5G56550 | 10.67231515 | 74.46849789 | -2.8028 | 1.02E-10   |
| AT3G51890 | 20.44158825 | 142.8291695 | -2.8047 | 3.96E-20   |
| AT3G06850 | 167.0627794 | 1168.427176 | -2.8061 | 9.90E-163  |
| AT5G63160 | 61.11952791 | 427.5478428 | -2.8064 | 1.17E-59   |
| AT4G29190 | 10.79545725 | 75.97196283 | -2.815  | 5.65E-11   |

|           |             |             |         |            |
|-----------|-------------|-------------|---------|------------|
| AT4G28240 | 14.98228857 | 106.4171279 | -2.8284 | 2.94E-15   |
| AT1G80670 | 25.61355636 | 183.7046226 | -2.8424 | 3.63E-26   |
| AT5G38940 | 11.24697827 | 80.90520717 | -2.8467 | 8.50E-12   |
| AT1G21790 | 7.388525872 | 53.23205559 | -2.8489 | 5.99E-08   |
| AT1G76700 | 31.40123496 | 226.2714737 | -2.8492 | 3.00E-32   |
| AT5G65207 | 34.23350321 | 248.1656819 | -2.8578 | 1.87E-35   |
| AT2G18193 | 33.98721901 | 246.8971334 | -2.8608 | 2.56E-35   |
| AT3G60930 | 4.843589183 | 35.33142613 | -2.8668 | 1.65E-05   |
| AT5G61560 | 4.022641864 | 29.36454964 | -2.8679 | 0.00011031 |
| AT3G05950 | 3.201694545 | 23.44465643 | -2.8724 | 0.00071574 |
| AT4G01010 | 3.283789276 | 24.05543907 | -2.8729 | 0.00059166 |
| AT1G47510 | 3.612168204 | 26.82745255 | -2.8928 | 0.00023033 |
| AT5G07010 | 31.27809286 | 232.8021496 | -2.8959 | 9.00E-34   |
| AT2G41730 | 6.895957481 | 51.49367425 | -2.9006 | 7.49E-08   |
| AT4G13300 | 4.392068157 | 32.8882956  | -2.9046 | 3.08E-05   |
| AT1G07150 | 15.51590433 | 116.2366333 | -2.9052 | 4.05E-17   |
| AT2G34930 | 12.10897296 | 91.71136144 | -2.921  | 1.13E-13   |
| AT3G61390 | 3.406931374 | 25.98175352 | -2.931  | 0.00026761 |
| AT5G18670 | 65.63473816 | 500.888742  | -2.932  | 2.39E-73   |
| AT4G02890 | 155.4463749 | 1186.421772 | -2.9321 | 1.70E-173  |
| AT4G37390 | 5.541394404 | 42.33193476 | -2.9334 | 1.24E-06   |
| AT2G45760 | 2.996457715 | 22.97482364 | -2.9387 | 0.00069068 |
| AT1G14540 | 10.50812568 | 81.14012357 | -2.9489 | 2.80E-12   |
| AT4G01026 | 4.104736596 | 32.04259657 | -2.9646 | 3.20E-05   |
| AT1G74010 | 7.881094264 | 62.01792884 | -2.9762 | 1.36E-09   |
| AT5G16370 | 88.21078944 | 698.3124821 | -2.9848 | 3.52E-104  |
| AT1G30755 | 20.31844615 | 160.9647153 | -2.9859 | 3.15E-24   |
| AT5G23350 | 16.00847272 | 127.4656371 | -2.9932 | 2.58E-19   |

|           |             |             |         |            |
|-----------|-------------|-------------|---------|------------|
| AT3G55940 | 6.731768017 | 53.70188839 | -2.9959 | 1.94E-08   |
| AT1G04100 | 5.500347038 | 43.97634954 | -2.9991 | 5.07E-07   |
| AT3G19250 | 2.462841957 | 19.73297736 | -3.0022 | 0.0017079  |
| AT1G52240 | 11.24697827 | 90.16091322 | -3.003  | 7.60E-14   |
| AT3G29670 | 2.421794591 | 19.45107768 | -3.0057 | 0.0018609  |
| AT3G61060 | 36.69634516 | 295.1489614 | -3.0077 | 1.67E-44   |
| AT4G14630 | 17.97874629 | 144.6145341 | -3.0078 | 5.73E-22   |
| AT1G78830 | 62.26885415 | 501.0296918 | -3.0083 | 2.02E-75   |
| AT1G12610 | 13.79191496 | 111.5852886 | -3.0163 | 4.11E-17   |
| AT3G06500 | 65.83997499 | 533.3072048 | -3.0179 | 1.55E-80   |
| AT5G47740 | 15.14647804 | 122.7203259 | -3.0183 | 8.91E-19   |
| AT4G28290 | 3.735310302 | 30.68008147 | -3.038  | 3.85E-05   |
| AT2G47950 | 2.914362983 | 24.00845579 | -3.0423 | 0.00036943 |
| AT1G61820 | 80.20655308 | 670.7332971 | -3.0639 | 7.18E-103  |
| AT5G39610 | 8.291567923 | 69.72318667 | -3.0719 | 4.55E-11   |
| AT4G30430 | 2.627031421 | 22.12912461 | -3.0744 | 0.00064163 |
| AT2G04040 | 4.351020791 | 36.78790779 | -3.0798 | 4.03E-06   |
| AT1G25400 | 112.5518775 | 953.9015222 | -3.0833 | 3.67E-147  |
| AT2G38820 | 9.03042051  | 76.53576219 | -3.0833 | 3.80E-12   |
| AT1G80920 | 129.545487  | 1103.825167 | -3.091  | 1.06E-170  |
| AT1G30135 | 2.011320932 | 17.19588027 | -3.0958 | 0.0032615  |
| AT3G17690 | 5.746631234 | 49.19149356 | -3.0976 | 4.96E-08   |
| AT3G06490 | 5.089873379 | 43.78841643 | -3.1048 | 3.15E-07   |
| AT3G50970 | 236.4328279 | 2041.752374 | -3.1103 | 0          |
| AT5G52710 | 4.761494451 | 41.3452859  | -3.1182 | 6.94E-07   |
| AT5G46590 | 2.011320932 | 17.61872979 | -3.1309 | 0.0026448  |
| AT1G09460 | 26.31136158 | 231.1577348 | -3.1351 | 1.93E-36   |
| AT5G61390 | 4.761494451 | 41.86210197 | -3.1362 | 5.29E-07   |

|           |             |             |         |            |
|-----------|-------------|-------------|---------|------------|
| AT3G45060 | 3.571120838 | 31.43181394 | -3.1378 | 2.08E-05   |
| AT2G18700 | 83.65453182 | 738.5771526 | -3.1422 | 3.31E-116  |
| AT5G64250 | 81.84844772 | 726.5024498 | -3.1499 | 1.34E-114  |
| AT1G05680 | 19.74378302 | 176.0933313 | -3.1569 | 5.00E-28   |
| AT5G28145 | 3.530073472 | 31.76069689 | -3.1695 | 1.65E-05   |
| AT5G62350 | 79.59084259 | 716.9178608 | -3.1711 | 7.50E-114  |
| AT2G27690 | 3.899499766 | 35.37840941 | -3.1815 | 4.35E-06   |
| AT1G43670 | 41.90936064 | 380.7524965 | -3.1835 | 8.89E-61   |
| AT3G13430 | 21.38567766 | 194.8866431 | -3.1879 | 2.73E-31   |
| AT1G76600 | 35.21863999 | 321.6005477 | -3.1909 | 1.80E-51   |
| AT3G11020 | 3.817405034 | 35.00254317 | -3.1968 | 4.68E-06   |
| AT5G08790 | 104.3013569 | 958.9287331 | -3.2007 | 1.23E-153  |
| AT2G32150 | 129.8328185 | 1194.033063 | -3.2011 | 2.82E-191  |
| AT2G30395 | 3.160647179 | 29.12963325 | -3.2042 | 3.76E-05   |
| AT2G35420 | 1.682942004 | 15.64543205 | -3.2167 | 0.004492   |
| AT5G45630 | 4.06368923  | 37.82153994 | -3.2183 | 1.56E-06   |
| AT2G43120 | 85.29642646 | 799.7963657 | -3.2291 | 2.78E-129  |
| AT4G36010 | 21.63196186 | 202.9677671 | -3.23   | 5.38E-33   |
| AT3G12920 | 24.09480382 | 226.3654403 | -3.2319 | 8.88E-37   |
| AT1G66050 | 1.765036736 | 16.63208092 | -3.2362 | 0.0030588  |
| AT1G30760 | 16.95256214 | 160.5888491 | -3.2438 | 2.86E-26   |
| AT4G24380 | 30.90866656 | 295.1959446 | -3.2556 | 3.25E-48   |
| AT3G23240 | 1.806084102 | 17.28984683 | -3.259  | 0.0023309  |
| AT3G02800 | 11.94478349 | 114.4512687 | -3.2603 | 6.33E-19   |
| AT3G48450 | 18.63550414 | 180.4627763 | -3.2756 | 9.10E-30   |
| AT3G09350 | 32.63265593 | 318.6875844 | -3.2878 | 1.65E-52   |
| AT5G13080 | 18.84074097 | 184.0335055 | -3.288  | 1.85E-30   |
| AT5G44260 | 2.503889323 | 24.61923842 | -3.2975 | 0.00014826 |



|           |             |             |         |            |
|-----------|-------------|-------------|---------|------------|
| AT4G03510 | 18.55340941 | 184.1274721 | -3.3109 | 1.13E-30   |
| AT4G34380 | 4.884636549 | 48.48674437 | -3.3113 | 1.99E-08   |
| AT5G64510 | 2.052368298 | 20.39074327 | -3.3126 | 0.00067851 |
| AT2G18550 | 2.791220885 | 27.76711814 | -3.3144 | 4.42E-05   |
| AT5G05600 | 24.42318274 | 247.8837823 | -3.3433 | 1.53E-41   |
| AT4G01870 | 80.94540566 | 823.6638716 | -3.347  | 9.12E-138  |
| AT5G41080 | 217.0995185 | 2216.436207 | -3.3518 | 0          |
| AT3G20670 | 23.72537752 | 244.7359025 | -3.3667 | 2.76E-41   |
| AT2G13960 | 1.477705174 | 15.41051565 | -3.3825 | 0.0037258  |
| AT1G15010 | 21.79615132 | 232.0974004 | -3.4126 | 1.15E-39   |
| AT3G15500 | 14.48972018 | 154.4340395 | -3.4139 | 1.68E-26   |
| AT1G75860 | 26.47555104 | 283.4501248 | -3.4204 | 1.75E-48   |
| AT1G21120 | 30.82657183 | 334.8498325 | -3.4413 | 1.52E-57   |
| AT4G24230 | 82.75148977 | 900.4345502 | -3.4438 | 1.48E-154  |
| AT5G65600 | 1.682942004 | 18.32347898 | -3.4446 | 0.0011241  |
| AT5G25450 | 3.037505081 | 33.123212   | -3.4469 | 3.85E-06   |
| AT5G22300 | 6.280246991 | 68.87748764 | -3.4551 | 3.40E-12   |
| AT4G36410 | 10.34393622 | 114.2163523 | -3.4649 | 5.81E-20   |
| AT5G28630 | 21.75510396 | 240.5074074 | -3.4667 | 1.18E-41   |
| AT2G01340 | 7.142241676 | 79.21380912 | -3.4713 | 5.25E-14   |
| AT1G80160 | 21.63196186 | 240.2255077 | -3.4732 | 1.13E-41   |
| AT5G40000 | 9.276704706 | 103.4571813 | -3.4793 | 3.42E-18   |
| AT3G17110 | 36.81948726 | 413.7347586 | -3.4902 | 5.89E-72   |
| AT5G64530 | 2.873315617 | 32.74734576 | -3.5106 | 3.62E-06   |
| AT2G17840 | 218.8235079 | 2497.631134 | -3.5127 | 0          |
| AT1G14890 | 13.01201501 | 148.7020794 | -3.5145 | 3.43E-26   |
| AT2G32210 | 6.608625919 | 75.78402972 | -3.5195 | 1.40E-13   |
| AT4G18280 | 26.43450368 | 305.8141658 | -3.5322 | 9.01E-54   |

|           |             |             |         |           |
|-----------|-------------|-------------|---------|-----------|
| AT5G55090 | 2.175510396 | 25.27700433 | -3.5384 | 6.26E-05  |
| AT5G40880 | 8.907278412 | 104.2089138 | -3.5484 | 1.26E-18  |
| AT5G14470 | 7.552715336 | 91.94627784 | -3.6057 | 1.03E-16  |
| AT1G05560 | 1.354563077 | 16.49113108 | -3.6058 | 0.0017646 |
| AT3G15356 | 4.186831327 | 51.11780802 | -3.6099 | 1.63E-09  |
| AT3G19390 | 181.7987838 | 2245.236957 | -3.6265 | 0         |
| AT3G09405 | 3.201694545 | 39.79483768 | -3.6357 | 1.42E-07  |
| AT5G14070 | 1.190373613 | 14.8467163  | -3.6407 | 0.0031955 |
| AT1G14260 | 2.011320932 | 25.27700433 | -3.6516 | 4.80E-05  |
| AT3G03660 | 2.13446303  | 26.92141911 | -3.6568 | 2.44E-05  |
| AT1G77380 | 12.23211505 | 156.5013038 | -3.6774 | 1.32E-28  |
| AT1G22400 | 9.112515242 | 117.2702655 | -3.6858 | 1.47E-21  |
| AT5G42830 | 4.392068157 | 56.52088515 | -3.6858 | 1.21E-10  |
| AT5G52310 | 90.34525247 | 1175.991484 | -3.7023 | 1.29E-214 |
| AT4G24040 | 2.750173519 | 35.98919204 | -3.71   | 5.19E-07  |
| AT1G08050 | 14.28448335 | 189.0137331 | -3.726  | 7.47E-35  |
| AT5G10625 | 18.01979365 | 239.5677418 | -3.7328 | 3.80E-44  |
| AT4G35480 | 12.27316242 | 164.770361  | -3.7469 | 1.49E-30  |
| AT5G41610 | 3.406931374 | 45.99663056 | -3.755  | 6.95E-09  |
| AT3G02480 | 2.627031421 | 35.47237597 | -3.7552 | 5.59E-07  |
| AT3G19240 | 124.4145662 | 1698.915384 | -3.7714 | 0         |
| AT5G03545 | 65.01902767 | 900.904383  | -3.7924 | 1.63E-167 |
| AT4G18170 | 2.832268251 | 39.37198816 | -3.7971 | 9.67E-08  |
| AT3G46080 | 4.638352353 | 64.97787545 | -3.8083 | 1.86E-12  |
| AT2G17880 | 4.392068157 | 62.86362787 | -3.8393 | 3.85E-12  |
| AT5G12340 | 7.265383774 | 105.1015961 | -3.8546 | 4.87E-20  |
| AT1G60750 | 4.06368923  | 58.96401568 | -3.859  | 1.84E-11  |
| AT1G63180 | 23.84851962 | 348.1930838 | -3.8679 | 8.03E-66  |

|           |             |             |         |            |
|-----------|-------------|-------------|---------|------------|
| AT5G67080 | 2.668078787 | 39.79483768 | -3.8987 | 5.81E-08   |
| AT5G06760 | 3.119599813 | 46.79534631 | -3.9069 | 2.78E-09   |
| AT2G32190 | 11.329073   | 170.9721538 | -3.9157 | 9.38E-33   |
| AT5G48570 | 13.42248867 | 203.7194996 | -3.9239 | 5.11E-39   |
| AT4G12735 | 1.559799906 | 23.67957283 | -3.9242 | 5.30E-05   |
| AT5G08350 | 32.38637174 | 492.8076179 | -3.9276 | 3.87E-94   |
| AT2G30400 | 3.037505081 | 46.41948007 | -3.9338 | 2.97E-09   |
| AT2G46240 | 13.91505706 | 213.4450384 | -3.9391 | 5.72E-41   |
| AT2G31081 | 0           | 14.56481662 | -3.9474 | 0.0024821  |
| AT1G69680 | 11.24697827 | 173.6032175 | -3.9482 | 1.90E-33   |
| AT3G28210 | 33.33046116 | 515.5005419 | -3.9511 | 6.83E-99   |
| AT1G10160 | 8.455757387 | 131.9760319 | -3.9642 | 1.42E-25   |
| AT3G47340 | 166.2007848 | 2616.968664 | -3.9769 | 0          |
| AT5G13220 | 3.078552447 | 48.48674437 | -3.9773 | 1.03E-09   |
| AT5G54165 | 1.272468345 | 20.1088436  | -3.9821 | 0.00022488 |
| AT2G26380 | 1.51875254  | 24.33733874 | -4.0022 | 3.47E-05   |
| AT1G72800 | 5.089873379 | 81.84487276 | -4.0072 | 3.84E-16   |
| AT1G74000 | 2.832268251 | 46.18456368 | -4.0274 | 2.37E-09   |
| AT4G22710 | 24.79260904 | 408.0967651 | -4.0409 | 1.56E-79   |
| AT1G54050 | 2.668078787 | 44.0703161  | -4.0459 | 5.60E-09   |
| AT1G74310 | 43.67439738 | 723.166637  | -4.0495 | 5.18E-141  |
| AT4G22690 | 29.10258246 | 483.1290624 | -4.0532 | 2.54E-94   |
| AT5G49620 | 2.791220885 | 46.3724968  | -4.0543 | 1.99E-09   |
| AT1G22985 | 6.321294357 | 105.3834958 | -4.0593 | 7.97E-21   |
| AT4G28085 | 10.50812568 | 175.8584149 | -4.0648 | 1.47E-34   |
| AT5G46330 | 1.067231515 | 17.90062946 | -4.0681 | 0.00051597 |
| AT1G15040 | 79.42665312 | 1357.252976 | -4.0949 | 1.21E-266  |
| AT5G57510 | 4.884636549 | 83.95912034 | -4.1034 | 8.34E-17   |

|           |             |             |         |           |
|-----------|-------------|-------------|---------|-----------|
| AT5G19890 | 14.57181491 | 253.6157424 | -4.1214 | 3.89E-50  |
| AT5G24600 | 2.503889323 | 43.74143315 | -4.1268 | 5.05E-09  |
| AT4G35180 | 2.052368298 | 35.98919204 | -4.1322 | 1.58E-07  |
| AT1G59860 | 2.011320932 | 35.51935925 | -4.1424 | 1.89E-07  |
| AT5G65690 | 61.94047523 | 1105.328632 | -4.1574 | 3.22E-219 |
| AT4G01360 | 19.12807254 | 344.2464884 | -4.1697 | 1.68E-68  |
| AT5G49690 | 2.709126153 | 49.61434308 | -4.1949 | 2.92E-10  |
| AT2G40340 | 9.851367829 | 182.9059068 | -4.2146 | 9.29E-37  |
| AT2G41100 | 138.6990496 | 2588.073947 | -4.2218 | 0         |
| AT1G29395 | 1.477705174 | 27.76711814 | -4.2319 | 5.03E-06  |
| AT3G23550 | 1.559799906 | 29.55248276 | -4.2438 | 2.21E-06  |
| AT1G10170 | 85.62480538 | 1623.366271 | -4.2448 | 0         |
| AT5G48430 | 10.63126778 | 202.8268173 | -4.2539 | 6.05E-41  |
| AT5G28646 | 1.272468345 | 24.29035546 | -4.2547 | 2.33E-05  |
| AT5G06980 | 1.847131468 | 35.42539269 | -4.2614 | 1.50E-07  |
| AT4G25580 | 5.17196811  | 101.4369003 | -4.2937 | 9.19E-21  |
| AT5G57220 | 6.649673285 | 131.4592158 | -4.3052 | 7.84E-27  |
| AT3G12510 | 4.268926059 | 84.56990297 | -4.3082 | 2.00E-17  |
| AT4G16680 | 12.72468345 | 253.051943  | -4.3137 | 1.96E-51  |
| AT3G05630 | 2.503889323 | 50.08417587 | -4.3221 | 1.56E-10  |
| AT3G14210 | 0           | 13.20230152 | -4.3293 | 0.0031264 |
| AT4G21840 | 0           | 12.779452   | -4.3754 | 0.0036406 |
| AT2G47520 | 2.298652494 | 48.29881125 | -4.3931 | 2.92E-10  |
| AT1G01480 | 1.682942004 | 36.13014188 | -4.4241 | 7.67E-08  |
| AT1G15330 | 5.58244177  | 124.0358577 | -4.4737 | 7.09E-26  |
| AT5G02020 | 6.116057527 | 137.4260923 | -4.4899 | 1.10E-28  |
| AT5G39720 | 1.108278881 | 24.94812138 | -4.4925 | 1.22E-05  |
| AT4G20730 | 2.339699859 | 53.84283822 | -4.5244 | 1.49E-11  |

|           |             |             |         |            |
|-----------|-------------|-------------|---------|------------|
| AT1G73010 | 15.92637799 | 370.6041081 | -4.5404 | 2.44E-77   |
| AT5G52640 | 37.06577146 | 863.4587093 | -4.542  | 5.85E-180  |
| AT1G43160 | 22.94547757 | 535.0455861 | -4.5434 | 1.29E-111  |
| AT3G12320 | 0           | 16.35018124 | -4.5503 | 0.00062894 |
| AT1G71000 | 0           | 17.43079667 | -4.5602 | 0.00037845 |
| AT5G39120 | 1.108278881 | 26.40460304 | -4.5744 | 5.54E-06   |
| AT2G34390 | 1.354563077 | 32.51242936 | -4.5851 | 3.11E-07   |
| AT5G20150 | 27.95325622 | 672.1427955 | -4.5877 | 7.76E-141  |
| AT5G26340 | 30.8676192  | 747.4100091 | -4.5977 | 1.01E-156  |
| AT5G52670 | 1.108278881 | 26.96840239 | -4.6049 | 4.10E-06   |
| AT1G56060 | 0           | 17.33683011 | -4.6349 | 0.00037166 |
| AT5G38410 | 2.585984055 | 64.74295905 | -4.6459 | 5.84E-14   |
| AT3G02040 | 16.54208848 | 428.1116421 | -4.6938 | 1.01E-90   |
| AT1G63530 | 7.265383774 | 188.3559672 | -4.6963 | 4.91E-40   |
| AT2G39400 | 6.116057527 | 158.897451  | -4.6994 | 7.64E-34   |
| AT5G43360 | 0           | 13.39023464 | -4.7431 | 0.0021885  |
| AT2G17660 | 5.418252306 | 145.4602331 | -4.7467 | 3.89E-31   |
| AT2G30750 | 0           | 15.64543205 | -4.7669 | 0.00074326 |
| AT3G46090 | 1.354563077 | 36.88187435 | -4.767  | 2.91E-08   |
| AT1G64160 | 4.802541817 | 131.0833496 | -4.7705 | 3.81E-28   |
| AT1G56250 | 3.817405034 | 106.8869607 | -4.8073 | 4.36E-23   |
| AT5G39150 | 0           | 15.31654909 | -4.8431 | 0.0008287  |
| AT4G36820 | 1.108278881 | 33.02924544 | -4.8974 | 1.57E-07   |
| AT2G44578 | 2.011320932 | 60.93731342 | -4.9211 | 1.81E-13   |
| AT1G66090 | 2.709126153 | 83.39532098 | -4.9441 | 2.71E-18   |
| AT5G52050 | 23.06861967 | 721.4282556 | -4.9669 | 3.99E-156  |
| AT3G44870 | 0           | 12.87341856 | -4.971  | 0.0024981  |
| AT2G05580 | 0           | 31.43181394 | -4.9958 | 3.06E-07   |

|            |             |             |         |            |
|------------|-------------|-------------|---------|------------|
| AT5G43650  | 0           | 18.37046226 | -4.9985 | 0.00017568 |
| AT1G59660  | 14.81809911 | 473.7793897 | -4.9988 | 7.98E-103  |
| AT3G53600  | 0           | 14.6117999  | -5.0162 | 0.0010586  |
| AT5G24640  | 1.149326247 | 37.53964026 | -5.0296 | 1.47E-08   |
| AT1G77120  | 18.59445678 | 609.6080506 | -5.0349 | 1.51E-132  |
| AT2G24130  | 2.462841957 | 81.32805669 | -5.0454 | 5.73E-18   |
| AT1G69490  | 12.39630452 | 427.923709  | -5.1094 | 1.62E-93   |
| AT1G26380  | 0           | 22.73990724 | -5.1137 | 1.94E-05   |
| AT1G21529  | 0           | 17.33683011 | -5.1158 | 0.00027412 |
| AT4G37370  | 4.022641864 | 143.6278852 | -5.158  | 1.23E-31   |
| AT5G39580  | 23.06861967 | 834.657959  | -5.1772 | 7.56E-183  |
| AT3G60120  | 0           | 11.98073625 | -5.1892 | 0.0035263  |
| AT1G52890  | 0           | 16.86699731 | -5.2233 | 0.00032863 |
| AT1G16030  | 7.265383774 | 284.4837569 | -5.2912 | 8.93E-63   |
| AT2G36770  | 0           | 19.68599408 | -5.2991 | 7.89E-05   |
| AT3G47380  | 1.51875254  | 60.37351406 | -5.313  | 1.24E-13   |
| AT4G06746  | 4.022641864 | 160.4948825 | -5.3182 | 1.42E-35   |
| AT4G34210  | 0           | 20.01487704 | -5.323  | 6.66E-05   |
| AT3G28600  | 0           | 23.02180692 | -5.3241 | 1.51E-05   |
| AT5G33355  | 15.02333594 | 617.8301245 | -5.3619 | 1.57E-136  |
| AT2G36800  | 0           | 15.31654909 | -5.3737 | 0.00066628 |
| AT2G22860  | 19.1691199  | 795.0040712 | -5.3741 | 1.19E-175  |
| AT1G06225  | 0           | 20.76660951 | -5.3762 | 4.51E-05   |
| Novel00001 | 1.477705174 | 62.53474492 | -5.4032 | 3.78E-14   |
| AT5G38430  | 0           | 21.14247574 | -5.4237 | 3.68E-05   |
| AT1G02920  | 12.60154135 | 558.5372258 | -5.47   | 6.93E-124  |
| AT5G01380  | 3.940547132 | 175.3415988 | -5.4756 | 4.81E-39   |
| AT5G26000  | 0           | 22.27007445 | -5.477  | 2.06E-05   |

|           |             |             |         |            |
|-----------|-------------|-------------|---------|------------|
| AT5G59080 | 2.216557762 | 102.9873485 | -5.538  | 4.16E-23   |
| AT5G20230 | 22.78128811 | 1122.289596 | -5.6225 | 9.36E-250  |
| AT5G01760 | 0           | 12.40358577 | -5.6543 | 0.0026407  |
| AT3G19615 | 0           | 39.32500488 | -5.656  | 3.84E-09   |
| AT1G26240 | 1.067231515 | 55.44026972 | -5.699  | 1.11E-12   |
| AT1G71520 | 0           | 44.02333282 | -5.7448 | 3.51E-10   |
| AT5G43370 | 0           | 19.8739272  | -5.7494 | 6.44E-05   |
| AT1G07400 | 2.503889323 | 136.0165939 | -5.7635 | 1.58E-30   |
| AT1G11925 | 0           | 27.34426863 | -5.7732 | 1.54E-06   |
| AT4G13420 | 0           | 11.22900378 | -5.7738 | 0.0046361  |
| AT3G60420 | 0           | 22.5989574  | -5.7828 | 1.65E-05   |
| AT3G22740 | 1.436657808 | 79.68364191 | -5.7935 | 4.75E-18   |
| AT2G11810 | 0           | 39.0431052  | -5.8061 | 4.28E-09   |
| AT4G33720 | 2.832268251 | 158.6625346 | -5.8079 | 1.45E-35   |
| AT1G63040 | 0           | 35.37840941 | -5.8445 | 2.70E-08   |
| AT1G19250 | 0           | 19.4040944  | -5.8849 | 8.05E-05   |
| AT1G70130 | 0           | 38.90215537 | -5.8883 | 4.56E-09   |
| AT5G52400 | 0           | 12.49755233 | -5.9282 | 0.0024878  |
| AT1G32970 | 0           | 18.0415793  | -5.9725 | 0.00015963 |
| AT1G14550 | 0           | 21.7062751  | -6.0466 | 2.57E-05   |
| AT2G24850 | 0           | 28.23695094 | -6.1042 | 9.88E-07   |
| AT1G10155 | 0           | 11.69883658 | -6.1549 | 0.0036893  |
| AT2G43620 | 0           | 40.8754531  | -6.2593 | 1.81E-09   |
| AT5G62360 | 1.436657808 | 113.2766867 | -6.301  | 2.16E-25   |
| AT4G33467 | 0           | 48.43976109 | -6.3973 | 4.30E-11   |
| AT2G02250 | 0           | 14.8467163  | -6.4986 | 0.00083387 |
| AT3G22910 | 6.854910115 | 650.2955706 | -6.5678 | 2.09E-143  |
| AT1G02930 | 5.705583868 | 573.4309254 | -6.6511 | 4.16E-126  |

|           |             |             |         |            |
|-----------|-------------|-------------|---------|------------|
| AT3G16120 | 0           | 29.88136572 | -6.7004 | 5.46E-07   |
| AT1G17710 | 0           | 22.50499085 | -6.7768 | 2.15E-05   |
| AT3G03670 | 0           | 31.90164673 | -6.7948 | 2.16E-07   |
| AT3G27690 | 0           | 95.70494019 | -6.7948 | 3.77E-21   |
| AT2G31345 | 0           | 14.70576646 | -6.8999 | 0.0010028  |
| AT4G21920 | 0           | 86.35526759 | -6.9513 | 5.54E-19   |
| AT3G16530 | 1.108278881 | 140.8558717 | -6.9898 | 1.13E-30   |
| AT3G44860 | 0           | 21.04850918 | -7.0022 | 4.91E-05   |
| AT4G32950 | 1.149326247 | 152.3197919 | -7.0502 | 4.86E-33   |
| AT2G15780 | 0           | 28.47186733 | -7.1161 | 1.47E-06   |
| AT1G75600 | 0           | 84.38196985 | -7.1981 | 2.60E-18   |
| AT5G55150 | 0           | 37.35170714 | -7.2447 | 2.31E-08   |
| AT2G10940 | 0           | 19.4040944  | -7.2999 | 0.00012894 |
| AT5G14740 | 0           | 20.24979343 | -7.3614 | 8.97E-05   |
| AT4G36600 | 0           | 13.71911759 | -7.3847 | 0.0019669  |
| AT3G19920 | 0           | 34.57969366 | -7.3965 | 1.04E-07   |
| AT2G42560 | 0           | 92.41611063 | -7.4362 | 1.07E-19   |
| AT3G09922 | 0           | 58.58814945 | -7.4791 | 1.29E-12   |
| AT1G34047 | 0           | 149.8296781 | -7.5858 | 2.33E-31   |
| AT1G48710 | 0           | 15.83336517 | -7.5915 | 0.00081584 |
| AT4G33930 | 0           | 116.3775831 | -7.6619 | 2.76E-24   |
| AT3G63380 | 6.239199625 | 1289.878953 | -7.6917 | 4.42E-266  |
| AT5G61890 | 0           | 17.14889699 | -7.7066 | 0.00048079 |
| AT1G80660 | 0           | 42.56685116 | -8.0182 | 6.28E-09   |
| AT4G37710 | 0           | 21.98817477 | -8.0652 | 7.06E-05   |
| AT1G69930 | 0           | 67.84385549 | -8.1058 | 8.28E-14   |
| AT5G64750 | 1.600847272 | 527.8571444 | -8.3652 | 2.31E-102  |
| AT2G38240 | 2.011320932 | 680.2709028 | -8.4018 | 2.37E-131  |



|           |   |             |         |           |
|-----------|---|-------------|---------|-----------|
| AT1G69920 | 0 | 133.9493296 | -8.5022 | 8.41E-26  |
| AT1G05675 | 0 | 79.40174223 | -8.5957 | 2.56E-15  |
| AT3G55970 | 0 | 36.0831586  | -8.7798 | 4.11E-07  |
| AT3G01500 | 0 | 38.71422225 | -8.8814 | 1.66E-07  |
| AT5G12030 | 0 | 214.3377207 | -8.8909 | 2.38E-39  |
| AT5G38420 | 0 | 48.06389485 | -9.1934 | 7.22E-09  |
| AT4G25200 | 0 | 29.59946604 | -9.4941 | 1.73E-05  |
| AT2G02010 | 0 | 535.4214524 | -9.5012 | 9.20E-91  |
| AT3G46230 | 0 | 679.8950366 | -9.8458 | 6.77E-110 |
| AT3G43250 | 0 | 38.1504229  | -9.8602 | 1.36E-06  |
| AT1G53540 | 0 | 256.8106054 | -10.026 | 1.37E-40  |
| AT2G36255 | 0 | 102.8933819 | -10.292 | 6.87E-16  |
| AT5G12020 | 0 | 108.9072417 | -10.374 | 1.38E-16  |
