# Supplementary figures and images for: Expression of Root Genes in Arabidopsis Seedlings Grown by Standard and Improved Growing Methods
Source: MDPI journal article supplement (doi:10.3390/ijms18050951), 2017-05-03

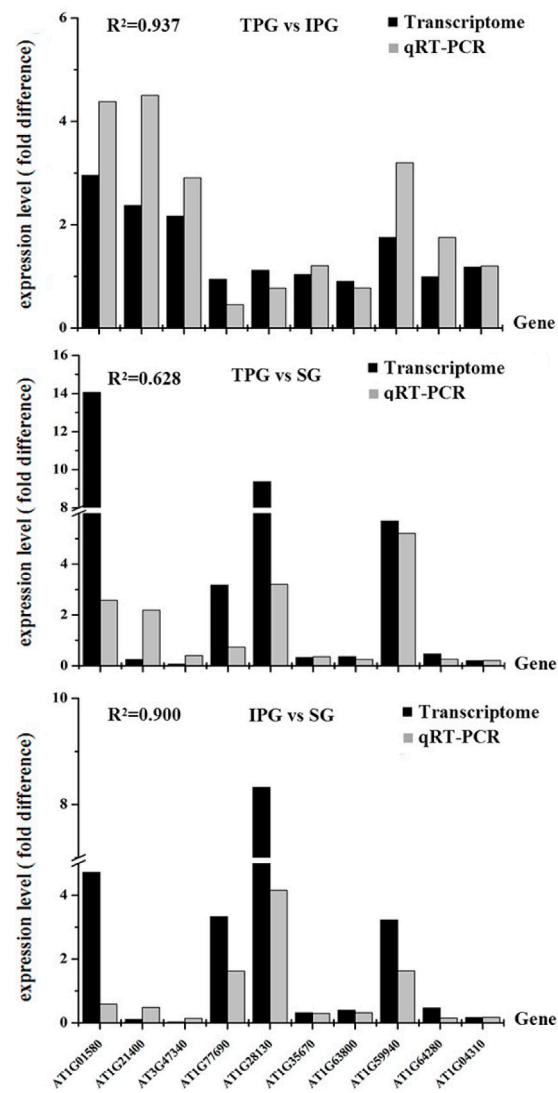

**Figure S1.** Validation of the transcriptome results by qRT-PCR.

Supplement: s1 [file s1]
